# Supplementary material for: DNA Barcoding the Native Flowering Plants and Conifers of Wales
Source: PLoS One. 2012 Jun 6;7(6):e37945. doi: 10.1371/journal.pone.0037945 (PMC3368937; doi:10.1371/journal.pone.0037945)
Supplement: Dataset S2 — Sequence quality scores. (XLSX) [file pone.0037945.s005.xlsx]

## Sheet: rbcL quality statistics
ID	BOLD ID	GENBANK ID	Collection type	Order	Family	Genus	Species	Year collected	Primer type	Forward primer	Reverse primer	Forward read length	Forward 5' trimmed	Forward 3' trimmed	Forward total trimmed	Forward trimmed length	Forward trimmed bases QV < 20	Forward trimmed bases QV < 30	Forward trimmed bases QV > 20	Forward trimmed bases QV > 30	Forward trimmed mean QV	Forward trimmed %	Forward trimmed % QV < 20	Forward trimmed % QV < 30	Forward trimmed % QV > 20	Forward trimmed % QV > 30	Reverse read length	Reverse 5' trimmed	Reverse 3' trimmed	Reverse total trimmed	Reverse trimmed length	Reverse trimmed bases QV < 20	Reverse trimmed bases QV < 30	Reverse trimmed bases QV > 20	Reverse trimmed bases QV > 30	Reverse trimmed mean QV	Reverse trimmed %	Reverse trimmed % QV < 20	Reverse trimmed % QV < 30	Reverse trimmed % QV > 20	Reverse trimmed % QV > 30	Contig seq length	Contig total bases used	Contig QV < 20	Contig QV < 30	Contig QV >= 20	Contig QV >= 30	Contig mean QV	Contig % QV < 20
NMW2000	POWNA1221-12	JN890989	Herbarium	Alismatales	Alismataceae	Alisma	Alisma_lanceolatum	1987	rbcL	rbcLa-F	rbcLa-R	576	158	6	164	412	6	18	406	394	50	28.47	1.46	4.37	98.54	95.63	587	8	47	55	532	23	34	509	498	55	9.37	4.32	6.39	95.68	93.61	596	944	29	52	915	892	53	3.07
NMW2001	POWNA1220-12	JN890988	Herbarium	Alismatales	Alismataceae	Alisma	Alisma_lanceolatum	1967	rbcL	rbcLa-F	rbcLr590	567	31	5	36	531	10	22	521	509	56	6.35	1.88	4.14	98.12	95.86	571	13	30	43	528	9	15	519	513	59	7.53	1.7	2.84	98.3	97.16	578	1059	19	37	1040	1022	57	1.79
NMW021	POWNA021-10	JN890789	Herbarium	Alismatales	Alismataceae	Alisma	Alisma_lanceolatum	1994	rbcL	rbcLa-F	rbcLr590	552	24	16	40	512	11	21	501	491	55	7.25	2.15	4.1	97.85	95.9	549	4	34	38	511	9	18	502	493	57	6.92	1.76	3.52	98.24	96.48	563	1023	20	39	1003	984	56	1.96
NMW2002	POWNA1219-12	JN890987	Herbarium	Alismatales	Alismataceae	Alisma	Alisma_plantago-aquatica	1968	rbcL	rbcLa-F	rbcLr590	567	28	20	48	519	6	10	513	509	56	8.47	1.16	1.93	98.84	98.07	571	16	32	48	523	9	13	514	510	59	8.41	1.72	2.49	98.28	97.51	564	1042	15	23	1027	1019	58	1.44
NMW5206	POWNB228-10	JN892482	Fresh	Alismatales	Alismataceae	Alisma	Alisma_plantago-aquatica	2010	rbcL	rbcLa-F	rbcLa-R	573	22	15	37	536	4	13	532	523	59	6.46	0.75	2.43	99.25	97.57	573	9	39	48	525	26	68	499	457	44	8.38	4.95	12.95	95.05	87.05	576	1061	30	81	1031	980	51	2.83
NMW2003	POWNA1218-12	JN890986	Herbarium	Alismatales	Alismataceae	Alisma	Alisma_plantago-aquatica	1990	rbcL	rbcLa-F	rbcLr590	565	28	16	44	521	4	6	517	515	60	7.79	0.77	1.15	99.23	98.85	568	12	25	37	531	4	11	527	520	59	6.51	0.75	2.07	99.25	97.93	567	1052	8	17	1044	1035	60	0.76
NMW022	POWNA022-10	JN890787	Herbarium	Alismatales	Alismataceae	Alisma	Alisma_plantago-aquatica	1999	rbcL	rbcLa-F	rbcLr590	555	18	17	35	520	4	14	516	506	57	6.31	0.77	2.69	99.23	97.31	547	3	19	22	525	5	16	520	509	58	4.02	0.95	3.05	99.05	96.95	563	1045	9	30	1036	1015	57	0.86
NMW081	POWNA066-10	JN893068	Herbarium	Alismatales	Alismataceae	Baldellia	Baldellia_ranunculoides	1999	rbcL	rbcLa-F	rbcLr590	553	16	16	32	521	4	11	517	510	57	5.79	0.77	2.11	99.23	97.89	562	18	19	37	525	4	12	521	513	57	6.58	0.76	2.29	99.24	97.71	563	1046	8	23	1038	1023	57	0.76
NMW515	POWNA440-10	JN892505	Herbarium	Alismatales	Alismataceae	Luronium	Luronium_natans	1989	rbcL	rbcLa-F	rbcLr590	642	27	97	124	518	7	17	511	501	55	19.31	1.35	3.28	98.65	96.72	647	90	48	138	509	13	24	496	485	54	21.33	2.55	4.72	97.45	95.28	570	1027	20	41	1007	986	55	1.95
NMW2007	POWNA1222-12	JN890990	Herbarium	Alismatales	Alismataceae	Luronium	Luronium_natans	1998	rbcL	rbcLa-F	rbcLr590	569	31	14	45	524	4	5	520	519	60	7.91	0.76	0.95	99.24	99.05	570	12	30	42	528	4	8	524	520	60	7.37	0.76	1.52	99.24	98.48	572	1052	8	13	1044	1039	60	0.76
NMW2006	POWNA1223-12	JN890991	Herbarium	Alismatales	Alismataceae	Luronium	Luronium_natans	1978	rbcL	rbcLa-F	rbcLr590	611	27	65	92	519	4	5	515	514	60	15.06	0.77	0.96	99.23	99.04	567	15	23	38	529	4	9	525	520	59	6.7	0.76	1.7	99.24	98.3	564	1048	8	14	1040	1034	59	0.76
NMW743	POWNA631-10	JN890853	Herbarium	Alismatales	Alismataceae	Sagittaria	Sagittaria_sagittifolia	1999	rbcL	rbcLa-F	rbcLr590	646	30	98	128	518	10	20	508	498	54	19.81	1.93	3.86	98.07	96.14	638	83	46	129	509	13	32	496	477	53	20.22	2.55	6.29	97.45	93.71	570	1027	23	52	1004	975	53	2.24
NMW6033	POWNA1566-12	JN891493	Fresh	Alismatales	Araceae	Arum	Arum_italicum	2011	rbcL	rbcLa-F	rbcLr590	564	28	0	28	536	4	9	532	527	58	4.96	0.75	1.68	99.25	98.32	567	3	47	50	517	4	10	513	507	60	8.82	0.77	1.93	99.23	98.07	588	1053	8	19	1045	1034	59	0.76
NMW6043	POWNA1693-12	JN891717	Fresh	Alismatales	Araceae	Arum	Arum_italicum	2011	rbcL	rbcLa-F	rbcLr590	563	28	10	38	525	4	7	521	518	56	6.75	0.76	1.33	99.24	98.67	568	10	30	40	528	4	10	524	518	59	7.04	0.76	1.89	99.24	98.11	574	1053	8	17	1045	1036	58	0.76
NMW5363	POWNA960-12	JN892226	Fresh	Alismatales	Araceae	Arum	Arum_italicum	2010	rbcL	rbcLa-F	rbcLr590	641	27	81	108	533	4	8	529	525	56	16.85	0.75	1.5	99.25	98.5	567	14	25	39	528	4	10	524	518	60	6.88	0.76	1.89	99.24	98.11	577	1061	8	18	1053	1043	58	0.75
NMW6044	POWNA1699-12	JN891723	Fresh	Alismatales	Araceae	Arum	Arum_italicum	2011	rbcL	rbcLa-F	rbcLr590	567	33	1	34	533	4	5	529	528	58	6	0.75	0.94	99.25	99.06	571	0	32	32	539	4	13	535	526	59	5.6	0.74	2.41	99.26	97.59	590	1072	8	18	1064	1054	59	0.75
NMW2077	POWNA1079-12	JN890768	Herbarium	Alismatales	Araceae	Arum	Arum_maculatum	1974	rbcL	rbcLa-F	rbcLr590	573	49	6	55	518	4	8	514	510	57	9.6	0.77	1.54	99.23	98.46	573	0	55	55	518	4	5	514	513	60	9.6	0.77	0.97	99.23	99.03	589	1036	8	13	1028	1023	58	0.77
NMW5160	POWNB048-10	JN892245	Fresh	Alismatales	Araceae	Arum	Arum_maculatum	2010	rbcL	rbcLa-F	rbcLr590	565	29	12	41	524	4	6	520	518	60	7.26	0.76	1.15	99.24	98.85	566	15	25	40	526	4	7	522	519	59	7.07	0.76	1.33	99.24	98.67	568	1050	8	13	1042	1037	59	0.76
NBGW6008	POWNB207-10	JN893086	Fresh	Alismatales	Araceae	Arum	Arum_maculatum	2010	rbcL	rbcLa-F	rbcLr590	562	23	13	36	526	4	7	522	519	59	6.41	0.76	1.33	99.24	98.67	563	12	21	33	530	4	12	526	518	59	5.86	0.75	2.26	99.25	97.74	569	1056	8	19	1048	1037	59	0.76
NMW482	POWNA413-10	JN891584	Herbarium	Alismatales	Araceae	Lemna	Lemna_gibba	1997	rbcL	rbcLa-F	rbcLr590	556	30	13	43	513	13	25	500	488	52	7.73	2.53	4.87	97.47	95.13	556	3	83	86	470	6	22	464	448	52	15.47	1.28	4.68	98.72	95.32	567	983	19	47	964	936	52	1.93
NMW2085	POWNA2521-12	JN892885	Herbarium	Alismatales	Araceae	Lemna	Lemna_minor	1987	rbcL	rbcLa-F	rbcLr590	575	38	18	56	519	10	38	509	481	46	9.74	1.93	7.32	98.07	92.68	571	11	37	48	523	4	11	519	512	59	8.41	0.76	2.1	99.24	97.9	571	1042	14	49	1028	993	53	1.34
NMW2086	POWNA2520-12	JN892884	Herbarium	Alismatales	Araceae	Lemna	Lemna_minor	1978	rbcL	rbcLa-F	rbcLr590	573	40	6	46	527	4	5	523	522	60	8.03	0.76	0.95	99.24	99.05	573	0	42	42	531	4	7	527	524	60	7.33	0.75	1.32	99.25	98.68	588	1058	8	12	1050	1046	60	0.76
NMW483	POWNA414-10	JN891585	Herbarium	Alismatales	Araceae	Lemna	Lemna_minor	2002	rbcL	rbcLa-F	rbcLr590	551	16	12	28	523	7	17	516	506	56	5.08	1.34	3.25	98.66	96.75	561	12	22	34	527	10	20	517	507	56	6.06	1.9	3.8	98.1	96.2	570	1050	17	37	1033	1013	56	1.62
NMW2083	POWNA2517-12	JN892881	Herbarium	Alismatales	Araceae	Lemna	Lemna_trisulca	2002	rbcL	rbcLa-F	rbcLr590	668	29	109	138	530	5	10	525	520	55	20.66	0.94	1.89	99.06	98.11	812	259	22	281	531	4	8	527	523	60	34.61	0.75	1.51	99.25	98.49	580	1061	9	18	1052	1043	57	0.85
NMW481	POWNA415-10	JN891583	Herbarium	Alismatales	Araceae	Lemna	Lemna_trisulca	1999	rbcL	rbcLa-F	rbcLr590	559	127	23	150	409	23	113	386	296	36	26.83	5.62	27.63	94.38	72.37	562	8	124	132	430	7	43	423	387	44	23.49	1.63	10	98.37	90	561	839	30	156	809	683	40	3.58
NMW2082	POWNA2518-12	JN892882	Herbarium	Alismatales	Araceae	Lemna	Lemna_trisulca	1988	rbcL	rbcLa-F	rbcLa-R	584	55	1	56	528	4	8	524	520	57	9.59	0.76	1.52	99.24	98.48	585	9	53	62	523	4	5	519	518	60	10.6	0.76	0.96	99.24	99.04	593	1051	8	13	1043	1038	58	0.76
NMW5205	POWNB068-10	JN892481	Fresh	Alismatales	Araceae	Lemna	Lemna_trisulca	2010	rbcL	rbcLa-F	rbcLr590	566	31	1	32	534	4	9	530	525	59	5.65	0.75	1.69	99.25	98.31	567	14	26	40	527	4	6	523	521	60	7.05	0.76	1.14	99.24	98.86	580	1061	8	15	1053	1046	59	0.75
NMW2084	POWNA2522-12	JN892886	Herbarium	Alismatales	Araceae	Lemna	Lemna_trisulca	2005	rbcL	rbcLa-F	rbcLr590	569	34	11	45	524	10	38	514	486	48	7.91	1.91	7.25	98.09	92.75	568	13	27	40	528	4	8	524	520	60	7.04	0.76	1.52	99.24	98.48	572	1052	14	46	1038	1006	54	1.33
NMW6035	POWNA1565-12	JN891492	Fresh	Alismatales	Araceae	Spirodela	Spirodela_polyrhiza	2011	rbcL	rbcLa-F	rbcLr590	567	32	0	32	535	4	10	531	525	58	5.64	0.75	1.87	99.25	98.13	567	1	53	54	513	4	10	509	503	60	9.52	0.78	1.95	99.22	98.05	591	1048	8	20	1040	1028	59	0.76
NMW2088	POWNA2524-12	JN892888	Herbarium	Alismatales	Araceae	Spirodela	Spirodela_polyrhiza	1957	rbcL	rbcLa-F	rbcLr590	552	28	1	29	523	4	6	519	517	59	5.25	0.76	1.15	99.24	98.85	568	11	35	46	522	4	8	518	514	60	8.1	0.77	1.53	99.23	98.47	569	1045	8	14	1037	1031	59	0.77
NMW5365	POWNA2069-12	JN892224	Fresh	Alismatales	Araceae	Spirodela	Spirodela_polyrhiza	2010	rbcL	rbcLa-F	rbcLr590	650	25	93	118	532	4	9	528	523	56	18.15	0.75	1.69	99.25	98.31	569	16	24	40	529	4	6	525	523	60	7.03	0.76	1.13	99.24	98.87	578	1061	8	15	1053	1046	58	0.75
NMW484	POWNA726-10	JN891580	Herbarium	Alismatales	Araceae	Spirodela	Spirodela_polyrhiza	2002	rbcL	rbcLa-F	rbcLr590	555	21	12	33	522	10	21	512	501	56	5.95	1.92	4.02	98.08	95.98	560	11	26	37	523	18	79	505	444	40	6.61	3.44	15.11	96.56	84.89	569	1045	28	100	1017	945	48	2.68
NMW2087	POWNA2519-12	JN892883	Herbarium	Alismatales	Araceae	Spirodela	Spirodela_polyrhiza	2005	rbcL	rbcLa-F	rbcLr590	567	17	7	24	543	4	11	539	532	59	4.23	0.74	2.03	99.26	97.97	567	1	30	31	536	4	8	532	528	59	5.47	0.75	1.49	99.25	98.51	588	1079	8	19	1071	1060	59	0.74
NMW2089	POWNA2523-12	JN892887	Herbarium	Alismatales	Araceae	Wolffia	Wolffia_arrhiza	1955	rbcL	rbcLa-F	rbcLr590	571	40	13	53	518	4	14	514	504	56	9.28	0.77	2.7	99.23	97.3	571	12	47	59	512	4	12	508	500	57	10.33	0.78	2.34	99.22	97.66	574	1030	8	26	1022	1004	56	0.78
NMW5217	POWNB143-10	JN892246	Fresh	Alismatales	Araceae	Wolffia	Wolffia_arrhiza	2010	rbcL	rbcLa-F	rbcLr590	567	31	11	42	525	5	15	520	510	53	7.41	0.95	2.86	99.05	97.14	570	22	27	49	521	9	49	512	472	45	8.6	1.73	9.4	98.27	90.6	563	1046	14	64	1032	982	49	1.34
NMW2010	POWNA1410-12	JN891257	Herbarium	Alismatales	Butomaceae	Butomus	Butomus_umbellatus	2006	rbcL	rbcLa-F	rbcLr590	566	31	10	41	525	4	8	521	517	56	7.24	0.76	1.52	99.24	98.48	569	12	35	47	522	4	6	518	516	56	8.26	0.77	1.15	99.23	98.85	571	1047	8	14	1039	1033	56	0.76
NMW107	POWNA088-10	JN890979	Herbarium	Alismatales	Butomaceae	Butomus	Butomus_umbellatus	2002	rbcL	rbcLa-F	rbcLr590	555	17	19	36	519	4	8	515	511	58	6.49	0.77	1.54	99.23	98.46	565	17	19	36	529	7	19	522	510	58	6.37	1.32	3.59	98.68	96.41	564	1048	11	27	1037	1021	58	1.05
NMW435	POWNA364-10	JN892728	Herbarium	Alismatales	Hydrocharitaceae	Hydrocharis	Hydrocharis_morsus-ranae	1997	rbcL	rbcLa-F	rbcLr590	563	27	15	42	521	11	17	510	504	55	7.46	2.11	3.26	97.89	96.74	641	94	26	120	521	13	27	508	494	55	18.72	2.5	5.18	97.5	94.82	565	1042	24	44	1018	998	55	2.3
NMW2013	POWNA1411-12	JN891258	Herbarium	Alismatales	Hydrocharitaceae	Hydrocharis	Hydrocharis_morsus-ranae	1962	rbcL	rbcLa-F	rbcLa-R	575	29	17	46	529	4	6	525	523	59	8	0.76	1.13	99.24	98.87	577	16	32	48	529	4	6	525	523	60	8.32	0.76	1.13	99.24	98.87	574	1058	8	12	1050	1046	59	0.76
NMW5195	POWNB083-10	JN892489	Fresh	Alismatales	Juncaginaceae	Triglochin	Triglochin_maritimum	2010	rbcL	rbcLa-F	rbcLr590	569	27	16	43	526	4	20	522	506	57	7.56	0.76	3.8	99.24	96.2	565	14	31	45	520	4	9	516	511	57	7.96	0.77	1.73	99.23	98.27	568	1046	8	29	1038	1017	57	0.76
NMW988	POWNA773-10	JN892771	Herbarium	Alismatales	Juncaginaceae	Triglochin	Triglochin_palustris	2002	rbcL	rbcLa-F	rbcLr590	562	35	13	48	514	16	25	498	489	52	8.54	3.11	4.86	96.89	95.14	563	14	77	91	472	7	27	465	445	52	16.16	1.48	5.72	98.52	94.28	568	986	23	52	963	934	52	2.33
NMW2018	POWNA1402-12	JN891427	Herbarium	Alismatales	Juncaginaceae	Triglochin	Triglochin_palustris	1963	rbcL	rbcLa-F	rbcLr590	568	29	15	44	524	4	6	520	518	60	7.75	0.76	1.15	99.24	98.85	569	11	50	61	508	4	6	504	502	60	10.72	0.79	1.18	99.21	98.82	570	1032	8	12	1024	1020	60	0.78
NMW2017	POWNA1413-12	JN891487	Herbarium	Alismatales	Juncaginaceae	Triglochin	Triglochin_palustris	1994	rbcL	rbcLa-F	rbcLr590	567	30	30	60	507	6	11	501	496	52	10.58	1.18	2.17	98.82	97.83	573	13	31	44	529	4	10	525	519	59	7.68	0.76	1.89	99.24	98.11	555	1036	10	21	1026	1015	56	0.97
NMW6354	POWNA1007-12	JN890676	Fresh	Alismatales	Juncaginaceae	Triglochin	Triglochin_palustris	2011	rbcL	rbcLa-F	rbcLr590	569	33	3	36	533	4	10	529	523	57	6.33	0.75	1.88	99.25	98.12	566	10	26	36	530	4	7	526	523	60	6.36	0.75	1.32	99.25	98.68	581	1063	8	17	1055	1046	59	0.75
NMW2020	POWNA1612-12	JN891567	Herbarium	Alismatales	Potamogetonaceae	Groenlandia	Groenlandia_densa	1988	rbcL	rbcLa-F	rbcLr590	567	43	14	57	510	52	128	458	382	37	10.05	10.2	25.1	89.8	74.9	571	11	45	56	515	4	5	511	510	60	9.81	0.78	0.97	99.22	99.03	569	1025	56	133	969	892	49	5.46
NMW2021	POWNA1611-12	JN891566	Herbarium	Alismatales	Potamogetonaceae	Groenlandia	Groenlandia_densa	1976	rbcL	rbcLa-F	rbcLr590	571	37	5	42	529	4	9	525	520	57	7.36	0.76	1.7	99.24	98.3	572	11	36	47	525	4	11	521	514	56	8.22	0.76	2.1	99.24	97.9	578	1054	8	20	1046	1034	56	0.76
NMW5271	POWNB123-10	JN893692	Fresh	Alismatales	Potamogetonaceae	Groenlandia	Groenlandia_densa	2010	rbcL	rbcLa-F	rbcLr590	570	32	16	48	522	4	11	518	511	58	8.42	0.77	2.11	99.23	97.89	568	12	30	42	526	4	11	522	515	57	7.39	0.76	2.09	99.24	97.91	573	1048	8	22	1040	1026	57	0.76
NMW2022	POWNA1614-12	JN891569	Herbarium	Alismatales	Potamogetonaceae	Potamogeton	Potamogeton_alpinus	1989	rbcL	rbcLa-F	rbcLr590	564	38	12	50	514	4	5	510	509	56	8.87	0.78	0.97	99.22	99.03	568	11	40	51	517	4	13	513	504	56	8.98	0.77	2.51	99.23	97.49	571	1031	8	18	1023	1013	56	0.78
NMW2023	POWNA1613-12	JN891568	Herbarium	Alismatales	Potamogetonaceae	Potamogeton	Potamogeton_alpinus	1992	rbcL	rbcLa-F	rbcLr590	550	26	3	29	521	4	5	517	516	59	5.27	0.77	0.96	99.23	99.04	570	10	32	42	528	4	8	524	520	59	7.37	0.76	1.52	99.24	98.48	570	1049	8	13	1041	1036	59	0.76
NMW653	POWNA553-10	JN891373	Herbarium	Alismatales	Potamogetonaceae	Potamogeton	Potamogeton_berchtoldii	1996	rbcL	rbcLa-F	rbcLr590	620	47	68	115	505	13	26	492	479	54	18.55	2.57	5.15	97.43	94.85	620	72	24	96	524	13	25	511	499	53	15.48	2.48	4.77	97.52	95.23	571	1029	26	51	1003	978	53	2.53
NMW2026	POWNA1610-12	JN891565	Herbarium	Alismatales	Potamogetonaceae	Potamogeton	Potamogeton_berchtoldii	1987	rbcL	rbcLa-F	rbcLr590	572	42	3	45	527	4	6	523	521	58	7.87	0.76	1.14	99.24	98.86	569	4	50	54	515	6	37	509	478	49	9.49	1.17	7.18	98.83	92.82	585	1042	10	43	1032	999	54	0.96
NMW2025	POWNA1608-12	JN891563	Herbarium	Alismatales	Potamogetonaceae	Potamogeton	Potamogeton_berchtoldii	1998	rbcL	rbcLa-F	rbcLr590	567	27	17	44	523	4	5	519	518	60	7.76	0.76	0.96	99.24	99.04	570	12	35	47	523	4	7	519	516	60	8.25	0.76	1.34	99.24	98.66	570	1046	8	12	1038	1034	60	0.76
NMW655	POWNA873-10	JN891374	Herbarium	Alismatales	Potamogetonaceae	Potamogeton	Potamogeton_coloratus	1987	rbcL	rbcLa-F	rbcLr506	552	72	90	162	390	4	9	386	381	54	29.35	1.03	2.31	98.97	97.69	950	477	54	531	419	4	6	415	413	60	55.89	0.95	1.43	99.05	98.57	490	809	8	15	801	794	57	0.99
NMW2027	POWNA1609-12	JN891564	Herbarium	Alismatales	Potamogetonaceae	Potamogeton	Potamogeton_coloratus	2006	rbcL	rbcLa-F	rbcLr590	564	27	5	32	532	4	6	528	526	60	5.67	0.75	1.13	99.25	98.87	571	14	35	49	522	4	6	518	516	60	8.58	0.77	1.15	99.23	98.85	577	1054	8	12	1046	1042	60	0.76
NMW656	POWNA554-10	JN891376	Herbarium	Alismatales	Potamogetonaceae	Potamogeton	Potamogeton_compressus	2001	rbcL	rbcLa-F	rbcLr590	619	42	67	109	510	10	14	500	496	56	17.61	1.96	2.75	98.04	97.25	620	74	26	100	520	10	17	510	503	54	16.13	1.92	3.27	98.08	96.73	568	1030	20	31	1010	999	55	1.94
NMW2030	POWNA1749-12	JN891789	Herbarium	Alismatales	Potamogetonaceae	Potamogeton	Potamogeton_compressus	1960	rbcL	rbcLa-F	rbcLr590	567	30	4	34	533	4	5	529	528	60	6	0.75	0.94	99.25	99.06	571	12	34	46	525	4	7	521	518	60	8.06	0.76	1.33	99.24	98.67	579	1058	8	12	1050	1046	60	0.76
NMW2029	POWNA1615-12	JN891574	Herbarium	Alismatales	Potamogetonaceae	Potamogeton	Potamogeton_compressus	2000	rbcL	rbcLa-F	rbcLr590	561	24	11	35	526	4	11	522	515	59	6.24	0.76	2.09	99.24	97.91	568	11	27	38	530	4	7	526	523	60	6.69	0.75	1.32	99.25	98.68	573	1056	8	18	1048	1038	60	0.76
NMW2031	POWNA1750-12	JN891790	Herbarium	Alismatales	Potamogetonaceae	Potamogeton	Potamogeton_crispus	1988	rbcL	rbcLa-F	rbcLr590	556	28	5	33	523	4	6	519	517	59	5.94	0.76	1.15	99.24	98.85	571	11	35	46	525	4	8	521	517	59	8.06	0.76	1.52	99.24	98.48	571	1048	8	14	1040	1034	59	0.76
NMW2033	POWNA1748-12	JN891788	Herbarium	Alismatales	Potamogetonaceae	Potamogeton	Potamogeton_crispus	2003	rbcL	rbcLa-F	rbcLr590	566	29	4	33	533	4	5	529	528	60	5.83	0.75	0.94	99.25	99.06	572	11	33	44	528	4	9	524	519	60	7.69	0.76	1.7	99.24	98.3	582	1061	8	14	1053	1047	60	0.75
NMW2032	POWNA1747-12	JN891787	Herbarium	Alismatales	Potamogetonaceae	Potamogeton	Potamogeton_crispus	1991	rbcL	rbcLa-F	rbcLr590	835	27	286	313	522	4	8	518	514	59	37.49	0.77	1.53	99.23	98.47	569	7	35	42	527	4	11	523	516	58	7.38	0.76	2.09	99.24	97.91	572	1049	8	19	1041	1030	59	0.76
NMW2036	POWNA1751-12	JN891791	Herbarium	Alismatales	Potamogetonaceae	Potamogeton	Potamogeton_filiformis	1993	rbcL	rbcLa-F	rbcLa-R	576	49	13	62	514	11	13	503	501	58	10.76	2.14	2.53	97.86	97.47	583	14	92	106	477	4	7	473	470	60	18.18	0.84	1.47	99.16	98.53	579	991	15	20	976	971	59	1.51
NMW2035	POWNA1753-12	JN891793	Herbarium	Alismatales	Potamogetonaceae	Potamogeton	Potamogeton_filiformis	1988	rbcL	rbcLa-F	rbcLajf634R	623	81	44	125	498	19	83	479	415	39	20.06	3.82	16.67	96.18	83.33	629	11	83	94	535	4	5	531	530	59	14.94	0.75	0.93	99.25	99.07	604	1033	23	88	1010	945	49	2.23
NMW5110	POWNB043-10	JN891033	Fresh	Alismatales	Potamogetonaceae	Potamogeton	Potamogeton_filiformis	2010	rbcL	rbcLa-F	rbcLr590	566	29	9	38	528	4	11	524	517	57	6.71	0.76	2.08	99.24	97.92	569	12	32	44	525	4	8	521	517	58	7.73	0.76	1.52	99.24	98.48	577	1053	8	19	1045	1034	57	0.76
NMW660	POWNA555-10	JN891637	Herbarium	Alismatales	Potamogetonaceae	Potamogeton	Potamogeton_friesii	1976	rbcL	rbcLa-F	rbcLr590	564	81	2	83	481	11	46	470	435	46	14.72	2.29	9.56	97.71	90.44	620	67	86	153	467	10	46	457	421	45	24.68	2.14	9.85	97.86	90.15	580	948	21	92	927	856	46	2.22
NMW2037	POWNA1752-12	JN891792	Herbarium	Alismatales	Potamogetonaceae	Potamogeton	Potamogeton_friesii	1974	rbcL	rbcLa-F	rbcLr590	566	28	14	42	524	4	7	520	517	60	7.42	0.76	1.34	99.24	98.66	569	14	33	47	522	4	6	518	516	60	8.26	0.77	1.15	99.23	98.85	567	1046	8	13	1038	1033	60	0.76
NMW2041	POWNA2914-12	JN893419	Herbarium	Alismatales	Potamogetonaceae	Potamogeton	Potamogeton_gramineus	1966	rbcL	rbcLa-F	rbcLa-R	585	51	6	57	528	4	5	524	523	59	9.74	0.76	0.95	99.24	99.05	583	15	45	60	523	4	4	519	519	60	10.29	0.76	0.76	99.24	99.24	584	1051	8	9	1043	1042	59	0.76
NMW2040	POWNA2915-12	JN893420	Herbarium	Alismatales	Potamogetonaceae	Potamogeton	Potamogeton_gramineus	1963	rbcL	rbcLa-F	rbcLr590	568	32	13	45	523	4	9	519	514	58	7.92	0.76	1.72	99.24	98.28	572	10	35	45	527	5	10	522	517	59	7.87	0.95	1.9	99.05	98.1	572	1050	9	19	1041	1031	58	0.86
NMW2039	POWNA1754-12	JN891795	Herbarium	Alismatales	Potamogetonaceae	Potamogeton	Potamogeton_gramineus	1990	rbcL	rbcLa-F	rbcLr590	600	27	56	83	517	4	7	513	510	60	13.83	0.77	1.35	99.23	98.65	568	17	27	44	524	4	7	520	517	59	7.75	0.76	1.34	99.24	98.66	561	1041	8	14	1033	1027	59	0.77
NMW5109	POWNB044-10	JN890803	Fresh	Alismatales	Potamogetonaceae	Potamogeton	Potamogeton_gramineus	2010	rbcL	rbcLa-F	rbcLr590	556	27	5	32	524	4	9	520	515	58	5.76	0.76	1.72	99.24	98.28	569	16	27	43	526	4	8	522	518	56	7.56	0.76	1.52	99.24	98.48	568	1050	8	17	1042	1033	57	0.76
NMW2046	POWNA2912-12	JN893416	Herbarium	Alismatales	Potamogetonaceae	Potamogeton	Potamogeton_natans	2003	rbcL	rbcLa-F	rbcLr590	569	31	5	36	533	4	6	529	527	60	6.33	0.75	1.13	99.25	98.87	571	14	35	49	522	4	5	518	517	60	8.58	0.77	0.96	99.23	99.04	577	1055	8	11	1047	1044	60	0.76
NMW663	POWNA556-10	JN891639	Herbarium	Alismatales	Potamogetonaceae	Potamogeton	Potamogeton_natans	2002	rbcL	rbcLa-F	rbcLr590	561	19	13	32	529	11	20	518	509	55	5.7	2.08	3.78	97.92	96.22	565	14	25	39	526	13	22	513	504	57	6.9	2.47	4.18	97.53	95.82	567	1055	24	42	1031	1013	56	2.27
NMW2045	POWNA2913-12	JN893417	Herbarium	Alismatales	Potamogetonaceae	Potamogeton	Potamogeton_natans	1999	rbcL	rbcLa-F	rbcLr590	564	26	12	38	526	4	9	522	517	59	6.74	0.76	1.71	99.24	98.29	564	11	24	35	529	4	7	525	522	60	6.21	0.76	1.32	99.24	98.68	570	1055	8	16	1047	1039	59	0.76
NMW665	POWNA557-10	JN891634	Herbarium	Alismatales	Potamogetonaceae	Potamogeton	Potamogeton_obtusifolius	1993	rbcL	rbcLa-F	rbcLr590	721	80	166	246	475	4	9	471	466	55	34.12	0.84	1.89	99.16	98.11	725	173	35	208	517	14	24	503	493	51	28.69	2.71	4.64	97.29	95.36	576	992	18	33	974	959	53	1.81
NMW2047	POWNA2911-12	JN893415	Herbarium	Alismatales	Potamogetonaceae	Potamogeton	Potamogeton_obtusifolius	1988	rbcL	rbcLa-F	rbcLr590	566	29	4	33	533	4	8	529	525	59	5.83	0.75	1.5	99.25	98.5	572	9	38	47	525	4	9	521	516	60	8.22	0.76	1.71	99.24	98.29	578	1058	8	17	1050	1041	59	0.76
NMW666	POWNA558-10	JN891635	Herbarium	Alismatales	Potamogetonaceae	Potamogeton	Potamogeton_pectinatus	1998	rbcL	rbcLa-F	rbcLr590	615	78	57	135	480	5	19	475	461	50	21.95	1.04	3.96	98.96	96.04	589	31	80	111	478	9	46	469	432	44	18.85	1.88	9.62	98.12	90.38	586	958	14	65	944	893	47	1.46
NMW2049	POWNA1281-12	JN893424	Herbarium	Alismatales	Potamogetonaceae	Potamogeton	Potamogeton_pectinatus	2005	rbcL	rbcLa-F	rbcLr590	568	30	10	40	528	22	61	506	467	46	7.04	4.17	11.55	95.83	88.45	567	6	31	37	530	6	16	524	514	56	6.53	1.13	3.02	98.87	96.98	580	1058	28	77	1030	981	51	2.65
NMW659	POWNA559-10	JN891364	Herbarium	Alismatales	Potamogetonaceae	Potamogeton	Potamogeton_perfoliatus	2003	rbcL	rbcLa-F	rbcLr590	896	30	349	379	517	4	21	513	496	48	42.3	0.77	4.06	99.23	95.94	650	95	41	136	514	4	8	510	506	57	20.92	0.78	1.56	99.22	98.44	567	1031	8	29	1023	1002	53	0.78
NMW2052	POWNA3045-12	JN893623	Herbarium	Alismatales	Potamogetonaceae	Potamogeton	Potamogeton_perfoliatus	1988	rbcL	rbcLa-F	rbcLr590	574	40	4	44	530	4	5	526	525	60	7.67	0.75	0.94	99.25	99.06	572	0	38	38	534	4	7	530	527	59	6.64	0.75	1.31	99.25	98.69	589	1064	8	12	1056	1052	60	0.75
NMW6243	POWNA2301-12	JN892166	Fresh	Alismatales	Potamogetonaceae	Potamogeton	Potamogeton_polygonifolius	2011	rbcL	rbcLa-F	rbcLr590	567	31	9	40	527	4	11	523	516	57	7.05	0.76	2.09	99.24	97.91	569	12	38	50	519	11	16	508	503	57	8.79	2.12	3.08	97.88	96.92	572	1046	15	27	1031	1019	57	1.43
NMW2055	POWNA3044-12	JN893621	Herbarium	Alismatales	Potamogetonaceae	Potamogeton	Potamogeton_polygonifolius	1988	rbcL	rbcLa-F	rbcLr590	575	42	4	46	529	4	6	525	523	60	8	0.76	1.13	99.24	98.87	575	2	46	48	527	4	6	523	521	58	8.35	0.76	1.14	99.24	98.86	590	1056	8	12	1048	1044	59	0.76
NMW5060	POWNB021-10	JN891052	Fresh	Alismatales	Potamogetonaceae	Potamogeton	Potamogeton_polygonifolius	2010	rbcL	rbcLa-F	rbcLr590	564	27	12	39	525	4	9	521	516	58	6.91	0.76	1.71	99.24	98.29	566	14	31	45	521	4	5	517	516	59	7.95	0.77	0.96	99.23	99.04	570	1046	8	14	1038	1032	59	0.76
NMW667	POWNA560-10	JN891636	Herbarium	Alismatales	Potamogetonaceae	Potamogeton	Potamogeton_praelongus	2001	rbcL	rbcLa-F	rbcLr590	563	24	16	40	523	11	20	512	503	55	7.1	2.1	3.82	97.9	96.18	623	72	27	99	524	12	22	512	502	56	15.89	2.29	4.2	97.71	95.8	570	1047	23	42	1024	1005	55	2.2
NMW2056	POWNA2235-12	JN893622	Herbarium	Alismatales	Potamogetonaceae	Potamogeton	Potamogeton_praelongus	1948	rbcL	rbcLa-F	rbcLajf634R	626	23	114	137	489	11	60	478	429	44	21.88	2.25	12.27	97.75	87.73	631	16	31	47	584	5	20	579	564	50	7.45	0.86	3.42	99.14	96.58	584	1073	16	80	1057	993	47	1.49
NMW664	POWNA561-10	JN891633	Herbarium	Alismatales	Potamogetonaceae	Potamogeton	Potamogeton_pusillus	2005	rbcL	rbcLa-F	rbcLr590	561	27	10	37	524	13	20	511	504	56	6.6	2.48	3.82	97.52	96.18	645	90	28	118	527	14	28	513	499	54	18.29	2.66	5.31	97.34	94.69	571	1051	27	48	1024	1003	55	2.57
NMW5272	POWNB114-10	JN893695	Fresh	Alismatales	Potamogetonaceae	Potamogeton	Potamogeton_pusillus	2010	rbcL	rbcLa-F	rbcLr590	568	29	15	44	524	4	7	520	517	58	7.75	0.76	1.34	99.24	98.66	566	11	31	42	524	4	8	520	516	57	7.42	0.76	1.53	99.24	98.47	571	1048	8	15	1040	1033	58	0.76
NMW2059	POWNA3047-12	JN893628	Herbarium	Alismatales	Potamogetonaceae	Potamogeton	Potamogeton_pusillus	1998	rbcL	rbcLa-F	rbcLr590	562	14	7	21	541	4	17	537	524	59	3.74	0.74	3.14	99.26	96.86	568	10	31	41	527	4	8	523	519	59	7.22	0.76	1.52	99.24	98.48	577	1068	8	25	1060	1043	59	0.75
NMW2062	POWNA929-12	JN890548	Herbarium	Alismatales	Potamogetonaceae	Potamogeton	Potamogeton_trichoides	1998	rbcL	rbcLa-F	rbcLr590	565	29	6	35	530	4	6	526	524	60	6.19	0.75	1.13	99.25	98.87	571	14	33	47	524	4	5	520	519	60	8.23	0.76	0.95	99.24	99.05	577	1054	8	11	1046	1043	60	0.76
NMW2061	POWNA927-12	JN890545	Herbarium	Alismatales	Potamogetonaceae	Potamogeton	Potamogeton_trichoides	1988	rbcL	rbcLa-F	rbcLr590	565	28	14	42	523	4	7	519	516	59	7.43	0.76	1.34	99.24	98.66	570	13	31	44	526	5	9	521	517	59	7.72	0.95	1.71	99.05	98.29	567	1049	9	16	1040	1033	59	0.86
NMW2060	POWNA928-12	JN890546	Herbarium	Alismatales	Potamogetonaceae	Potamogeton	Potamogeton_trichoides	2005	rbcL	rbcLa-F	rbcLr590	552	23	6	29	523	4	6	519	517	60	5.25	0.76	1.15	99.24	98.85	569	10	28	38	531	4	13	527	518	59	6.68	0.75	2.45	99.25	97.55	570	1054	8	19	1046	1035	59	0.76
NMW2067	POWNA931-12	JN890550	Herbarium	Alismatales	Potamogetonaceae	Zannichellia	Zannichellia_palustris	1986	rbcL	rbcLa-F	rbcLr590	573	40	4	44	529	4	4	525	525	60	7.68	0.76	0.76	99.24	99.24	578	5	45	50	528	4	7	524	521	59	8.65	0.76	1.33	99.24	98.67	586	1057	8	11	1049	1046	59	0.76
NMW2066	POWNA932-12	JN890551	Herbarium	Alismatales	Potamogetonaceae	Zannichellia	Zannichellia_palustris	2004	rbcL	rbcLa-F	rbcLr590	564	28	8	36	528	9	29	519	499	49	6.38	1.7	5.49	98.3	94.51	569	15	27	42	527	4	8	523	519	59	7.38	0.76	1.52	99.24	98.48	571	1055	13	37	1042	1018	54	1.23
NMW910	POWNA833-10	JN891167	Herbarium	Alismatales	Potamogetonaceae	Zannichellia	Zannichellia_palustris	1990	rbcL	rbcLa-F	rbcLr590	558	24	18	42	516	4	15	512	501	52	7.53	0.78	2.91	99.22	97.09	558	18	20	38	520	7	24	513	496	49	6.81	1.35	4.62	98.65	95.38	566	1036	11	39	1025	997	50	1.06
NMW868	POWNA624-10	JN892148	Herbarium	Alismatales	Ruppiaceae	Ruppia	Ruppia_maritima	1994	rbcL	rbcLa-F	rbcLr590	636	22	96	118	518	10	18	508	500	56	18.55	1.93	3.47	98.07	96.53	619	72	23	95	524	13	25	511	499	55	15.35	2.48	4.77	97.52	95.23	568	1042	23	43	1019	999	56	2.21
NMW2064	POWNA930-12	JN890549	Herbarium	Alismatales	Ruppiaceae	Ruppia	Ruppia_maritima	1987	rbcL	rbcLa-F	rbcLr590	570	32	7	39	531	4	6	527	525	60	6.84	0.75	1.13	99.25	98.87	558	10	36	46	512	4	14	508	498	58	8.24	0.78	2.73	99.22	97.27	578	1043	8	20	1035	1023	59	0.77
NMW2068	POWNA933-12	JN890552	Herbarium	Alismatales	Zosteraceae	Zostera	Zostera_marina	1989	rbcL	rbcLa-F	rbcLa-R	580	91	4	95	485	5	11	480	474	53	16.38	1.03	2.27	98.97	97.73	579	14	89	103	476	7	10	469	466	58	17.79	1.47	2.1	98.53	97.9	588	961	12	21	949	940	56	1.25
NMW2071	POWNA1082-12	JN890770	Herbarium	Alismatales	Zosteraceae	Zostera	Zostera_noltei	1971	rbcL	rbcLa-F	rbcLr590	560	33	5	38	522	4	9	518	513	54	6.79	0.77	1.72	99.23	98.28	575	12	40	52	523	4	18	519	505	55	9.04	0.76	3.44	99.24	96.56	569	1045	8	27	1037	1018	55	0.77
NMW2073	POWNA1081-12	JN890769	Herbarium	Alismatales	Zosteraceae	Zostera	Zostera_noltei	1972	rbcL	rbcLa-F	rbcLr590	571	37	4	41	530	4	7	526	523	60	7.18	0.75	1.32	99.25	98.68	577	2	42	44	533	4	7	529	526	59	7.63	0.75	1.31	99.25	98.69	590	1063	8	14	1055	1049	60	0.75
NMW4048	POWNA2946-12	JN893476	Herbarium	Apiales	Apiaceae	Aegopodium	Aegopodium_podagraria	1999	rbcL	rbcLa-F	rbcLr590	568	29	6	35	533	4	9	529	524	60	6.16	0.75	1.69	99.25	98.31	568	13	29	42	526	4	9	522	517	60	7.39	0.76	1.71	99.24	98.29	577	1059	8	18	1051	1041	60	0.76
NMW007	POWNA007-10	JN891275	Herbarium	Apiales	Apiaceae	Aegopodium	Aegopodium_podagraria	2007	rbcL	rbcLa-F	rbcLr590	554	23	7	30	524	4	14	520	510	57	5.42	0.76	2.67	99.24	97.33	565	16	24	40	525	8	16	517	509	56	7.08	1.52	3.05	98.48	96.95	566	1049	12	30	1037	1019	57	1.14
NMW4047	POWNA2940-12	JN893470	Herbarium	Apiales	Apiaceae	Aegopodium	Aegopodium_podagraria	1933	rbcL	rbcLa-F	rbcLr590	567	31	1	32	535	4	10	531	525	60	5.64	0.75	1.87	99.25	98.13	569	13	26	39	530	4	6	526	524	59	6.85	0.75	1.13	99.25	98.87	582	1065	8	16	1057	1049	60	0.75
NMW008	POWNA008-10	JN891276	Herbarium	Apiales	Apiaceae	Aethusa	Aethusa_cynapium	1994	rbcL	rbcLa-F	rbcLr590	699	30	151	181	518	4	20	514	498	50	25.89	0.77	3.86	99.23	96.14	798	254	24	278	520	8	13	512	507	57	34.84	1.54	2.5	98.46	97.5	566	1038	12	33	1026	1005	54	1.16
NMW4049	POWNA2945-12	JN891604	Herbarium	Apiales	Apiaceae	Aethusa	Aethusa_cynapium	1974	rbcL	rbcLa-F	rbcLr590	573	40	4	44	529	4	5	525	524	59	7.68	0.76	0.95	99.24	99.05	573	0	38	38	535	7	11	528	524	59	6.63	1.31	2.06	98.69	97.94	589	1064	11	16	1053	1048	59	1.03
NMW4050	POWNA3086-12	JN893699	Herbarium	Apiales	Apiaceae	Aethusa	Aethusa_cynapium	1982	rbcL	rbcLa-F	rbcLr590	564	26	7	33	531	4	12	527	519	59	5.85	0.75	2.26	99.25	97.74	565	10	27	37	528	4	8	524	520	59	6.55	0.76	1.52	99.24	98.48	573	1059	8	20	1051	1039	59	0.76
NMW4052	POWNA3084-12	JN893697	Herbarium	Apiales	Apiaceae	Angelica	Angelica_sylvestris	1928	rbcL	rbcLa-F	rbcLr590	565	30	8	38	527	4	5	523	522	60	6.73	0.76	0.95	99.24	99.05	570	46	38	84	486	9	24	477	462	52	14.74	1.85	4.94	98.15	95.06	543	1013	13	29	1000	984	56	1.28
NMW4051	POWNA3087-12	JN893700	Herbarium	Apiales	Apiaceae	Angelica	Angelica_sylvestris	1999	rbcL	rbcLa-F	rbcLr590	564	30	6	36	528	4	5	524	523	60	6.38	0.76	0.95	99.24	99.05	575	14	32	46	529	4	5	525	524	60	8	0.76	0.95	99.24	99.05	576	1057	8	10	1049	1047	60	0.76
NMW4054	POWNA3090-12	JN893703	Herbarium	Apiales	Apiaceae	Anthriscus	Anthriscus_caucalis	1961	rbcL	rbcLa-F	rbcLr590	539	42	1	43	496	5	12	491	484	58	7.98	1.01	2.42	98.99	97.58	476	16	31	47	429	10	21	419	408	51	9.87	2.33	4.9	97.67	95.1	577	925	15	33	910	892	55	1.62
NMW047	POWNA041-10	JN892202	Herbarium	Apiales	Apiaceae	Anthriscus	Anthriscus_caucalis	1985	rbcL	rbcLa-F	rbcLr590	554	28	154	182	372	37	82	335	290	37	32.85	9.95	22.04	90.05	77.96	561	11	42	53	508	27	39	481	469	50	9.45	5.31	7.68	94.69	92.32	509	880	64	121	816	759	44	7.27
NMW4056	POWNA3088-12	JN893701	Herbarium	Apiales	Apiaceae	Anthriscus	Anthriscus_sylvestris	1962	rbcL	rbcLa-F	rbcLr590	565	24	12	36	529	4	11	525	518	59	6.37	0.76	2.08	99.24	97.92	568	17	32	49	519	4	7	515	512	60	8.63	0.77	1.35	99.23	98.65	567	1048	8	18	1040	1030	59	0.76
NMW4057	POWNA3089-12	JN893702	Herbarium	Apiales	Apiaceae	Anthriscus	Anthriscus_sylvestris	1967	rbcL	rbcLa-F	rbcLr590	568	37	4	41	527	4	5	523	522	60	7.22	0.76	0.95	99.24	99.05	568	2	35	37	531	5	10	526	521	59	6.51	0.94	1.88	99.06	98.12	584	1058	9	15	1049	1043	60	0.85
NBGW5029	POWNA042-10	JN891074	Herbarium	Apiales	Apiaceae	Anthriscus	Anthriscus_sylvestris	2008	rbcL	rbcLa-F	rbcLr590	560	13	14	27	533	7	16	526	517	57	4.82	1.31	3	98.69	97	561	13	19	32	529	7	20	522	509	58	5.7	1.32	3.78	98.68	96.22	567	1062	14	36	1048	1026	58	1.32
NMW4058	POWNA3092-12	JN893705	Herbarium	Apiales	Apiaceae	Apium	Apium_graveolens	1960	rbcL	rbcLa-F	rbcLr590	565	26	18	44	521	4	7	517	514	60	7.79	0.77	1.34	99.23	98.66	566	15	27	42	524	4	7	520	517	60	7.42	0.76	1.34	99.24	98.66	561	1045	8	14	1037	1031	60	0.77
NMW051	POWNA046-10	JN892407	Herbarium	Apiales	Apiaceae	Apium	Apium_graveolens	1991	rbcL	rbcLa-F	rbcLr590	553	21	16	37	516	16	49	500	467	48	6.69	3.1	9.5	96.9	90.5	564	15	25	40	524	11	55	513	469	49	7.09	2.1	10.5	97.9	89.5	569	1040	27	104	1013	936	48	2.6
NMW4060	POWNA2589-12	JN892974	Herbarium	Apiales	Apiaceae	Apium	Apium_inundatum	1965	rbcL	rbcLa-F	rbcLr590	578	49	26	75	503	9	32	494	471	52	12.98	1.79	6.36	98.21	93.64	481	186	171	357	124	10	39	114	85	35	74.22	8.06	31.45	91.94	68.55	503	627	19	71	608	556	49	3.03
NMW4062	POWNA2588-12	JN892973	Herbarium	Apiales	Apiaceae	Apium	Apium_inundatum	1973	rbcL	rbcLa-F	rbcLr590	570	30	13	43	527	4	15	523	512	58	7.54	0.76	2.85	99.24	97.15	570	11	32	43	527	4	8	523	519	59	7.54	0.76	1.52	99.24	98.48	573	1054	8	23	1046	1031	59	0.76
NMW4063	POWNA2587-12	JN892972	Herbarium	Apiales	Apiaceae	Apium	Apium_nodiflorum	2003	rbcL	rbcLa-F	rbcLr590	572	31	7	38	534	4	8	530	526	59	6.64	0.75	1.5	99.25	98.5	572	4	66	70	502	5	12	497	490	55	12.24	1	2.39	99	97.61	585	1036	9	20	1027	1016	57	0.87
NMW053	POWNA047-10	JN892406	Herbarium	Apiales	Apiaceae	Apium	Apium_nodiflorum	2003	rbcL	rbcLa-F	rbcLr590	555	17	16	33	522	7	15	515	507	57	5.95	1.34	2.87	98.66	97.13	555	21	23	44	511	7	13	504	498	57	7.93	1.37	2.54	98.63	97.46	564	1033	14	28	1019	1005	57	1.36
NMW6212	POWNA3131-12	JN893767	Fresh	Apiales	Apiaceae	Apium	Apium_nodiflorum	2011	rbcL	rbcLa-F	rbcLr590	566	42	3	45	521	4	9	517	512	58	7.95	0.77	1.73	99.23	98.27	568	8	35	43	525	4	11	521	514	59	7.57	0.76	2.1	99.24	97.9	580	1046	8	20	1038	1026	58	0.76
NMW4064	POWNA2593-12	JN892978	Herbarium	Apiales	Apiaceae	Apium	Apium_nodiflorum	2003	rbcL	rbcLa-F	rbcLr590	562	25	6	31	531	4	9	527	522	58	5.52	0.75	1.69	99.25	98.31	568	8	31	39	529	4	12	525	517	59	6.87	0.76	2.27	99.24	97.73	577	1060	8	21	1052	1039	59	0.75
NMW4065	POWNA2592-12	JN892977	Herbarium	Apiales	Apiaceae	Berula	Berula_erecta	2000	rbcL	rbcLa-F	rbcLr590	565	30	4	34	531	4	7	527	524	60	6.02	0.75	1.32	99.25	98.68	569	13	27	40	529	4	8	525	521	59	7.03	0.76	1.51	99.24	98.49	575	1060	8	15	1052	1045	60	0.75
NMW084	POWNA070-10	JN893071	Herbarium	Apiales	Apiaceae	Berula	Berula_erecta	1997	rbcL	rbcLa-F	rbcLr590	555	17	18	35	520	5	13	515	507	57	6.31	0.96	2.5	99.04	97.5	563	12	21	33	530	9	18	521	512	56	5.86	1.7	3.4	98.3	96.6	570	1050	14	31	1036	1019	57	1.33
NMW4066	POWNA2591-12	JN892976	Herbarium	Apiales	Apiaceae	Berula	Berula_erecta	1997	rbcL	rbcLa-F	rbcLr590	566	29	9	38	528	4	7	524	521	59	6.71	0.76	1.33	99.24	98.67	565	2	26	28	537	5	13	532	524	59	4.96	0.93	2.42	99.07	97.58	582	1065	9	20	1056	1045	59	0.85
NMW4069	POWNA2586-12	JN892970	Herbarium	Apiales	Apiaceae	Bupleurum	Bupleurum_tenuissimum	1956	rbcL	rbcLa-F	rbcLr590	570	32	12	44	526	4	6	522	520	60	7.72	0.76	1.14	99.24	98.86	574	12	33	45	529	4	9	525	520	59	7.84	0.76	1.7	99.24	98.3	573	1055	8	15	1047	1040	59	0.76
NMW4067	POWNA2590-12	JN892975	Herbarium	Apiales	Apiaceae	Bupleurum	Bupleurum_tenuissimum	2006	rbcL	rbcLa-F	rbcLr590	566	31	2	33	533	4	9	529	524	60	5.83	0.75	1.69	99.25	98.31	567	20	21	41	526	4	9	522	517	60	7.23	0.76	1.71	99.24	98.29	571	1059	8	18	1051	1041	60	0.76
NBGW5019	POWNA150-10	JN891884	Fresh	Apiales	Apiaceae	Carum	Carum_verticillatum	2008	rbcL	rbcLa-F	rbcLr590	563	146	18	164	399	8	23	391	376	55	29.13	2.01	5.76	97.99	94.24	563	17	36	53	510	12	22	498	488	57	9.41	2.35	4.31	97.65	95.69	563	909	20	45	889	864	56	2.2
NMW4071	POWNA2766-12	JN893496	Herbarium	Apiales	Apiaceae	Carum	Carum_verticillatum	1982	rbcL	rbcLa-F	rbcLr590	565	27	1	28	537	4	17	533	520	58	4.96	0.74	3.17	99.26	96.83	569	16	32	48	521	4	7	517	514	59	8.44	0.77	1.34	99.23	98.66	578	1058	8	24	1050	1034	59	0.76
NMW4070	POWNA2765-12	JN893227	Herbarium	Apiales	Apiaceae	Carum	Carum_verticillatum	1979	rbcL	rbcLa-F	rbcLr590	670	28	111	139	531	4	6	527	525	57	20.75	0.75	1.13	99.25	98.87	566	13	24	37	529	4	8	525	521	60	6.54	0.76	1.51	99.24	98.49	578	1060	8	14	1052	1046	58	0.75
NMW202	POWNA167-10	JN892460	Herbarium	Apiales	Apiaceae	Chaerophyllum	Chaerophyllum_temulum	1991	rbcL	rbcLa-F	rbcLr590	553	17	12	29	524	5	17	519	507	57	5.24	0.95	3.24	99.05	96.76	562	17	26	43	519	6	15	513	504	58	7.65	1.16	2.89	98.84	97.11	565	1043	11	32	1032	1011	57	1.05
NMW6391	POWNA1357-12	JN891193	Fresh	Apiales	Apiaceae	Chaerophyllum	Chaerophyllum_temulum	2011	rbcL	rbcLa-F	rbcLr590	565	29	4	33	532	4	9	528	523	57	5.84	0.75	1.69	99.25	98.31	566	12	30	42	524	4	7	520	517	59	7.42	0.76	1.34	99.24	98.66	574	1056	8	16	1048	1040	58	0.76
NMW4073	POWNA2768-12	JN893230	Herbarium	Apiales	Apiaceae	Chaerophyllum	Chaerophyllum_temulum	1955	rbcL	rbcLa-F	rbcLr590	564	29	2	31	533	4	9	529	524	59	5.5	0.75	1.69	99.25	98.31	569	13	28	41	528	4	16	524	512	59	7.21	0.76	3.03	99.24	96.97	578	1061	8	25	1053	1036	59	0.75
NMW4072	POWNA2767-12	JN893229	Herbarium	Apiales	Apiaceae	Chaerophyllum	Chaerophyllum_temulum	1980	rbcL	rbcLa-F	rbcLr590	565	31	7	38	527	4	5	523	522	60	6.73	0.76	0.95	99.24	99.05	566	19	19	38	528	4	12	524	516	59	6.71	0.76	2.27	99.24	97.73	566	1055	8	17	1047	1038	60	0.76
NMW4074	POWNA2769-12	JN893231	Herbarium	Apiales	Apiaceae	Cicuta	Cicuta_virosa	1985	rbcL	rbcLa-F	rbcLr590	564	26	3	29	535	4	11	531	524	59	5.14	0.75	2.06	99.25	97.94	571	14	37	51	520	4	7	516	513	59	8.93	0.77	1.35	99.23	98.65	576	1055	8	18	1047	1037	59	0.76
NMW4075	POWNA2770-12	JN893232	Herbarium	Apiales	Apiaceae	Cicuta	Cicuta_virosa	1970	rbcL	rbcLa-F	rbcLr590	568	35	4	39	529	4	6	525	523	60	6.87	0.76	1.13	99.24	98.87	570	13	36	49	521	4	4	517	517	60	8.6	0.77	0.77	99.23	99.23	577	1050	8	10	1042	1040	60	0.76
NMW218	POWNA182-10	JN892686	Herbarium	Apiales	Apiaceae	Cicuta	Cicuta_virosa	1985	rbcL	rbcLa-F	rbcLr590	564	24	17	41	523	4	13	519	510	57	7.27	0.76	2.49	99.24	97.51	564	20	25	45	519	9	13	510	506	57	7.98	1.73	2.5	98.27	97.5	563	1042	13	26	1029	1016	57	1.25
NMW236	POWNA193-10	JN893157	Herbarium	Apiales	Apiaceae	Conium	Conium_maculatum	1987	rbcL	rbcLa-F	rbcLr590	553	20	10	30	523	23	68	500	455	43	5.42	4.4	13	95.6	87	562	11	43	54	508	28	47	480	461	48	9.61	5.51	9.25	94.49	90.75	573	1031	51	115	980	916	45	4.95
NMW4076	POWNA2771-12	JN893233	Herbarium	Apiales	Apiaceae	Conium	Conium_maculatum	1962	rbcL	rbcLa-F	rbcLr590	571	30	5	35	536	4	12	532	524	60	6.13	0.75	2.24	99.25	97.76	570	11	30	41	529	4	8	525	521	60	7.19	0.76	1.51	99.24	98.49	579	1065	8	20	1057	1045	60	0.75
NMW4077	POWNA2772-12	JN893511	Herbarium	Apiales	Apiaceae	Conium	Conium_maculatum	1957	rbcL	rbcLa-F	rbcLr590	562	28	3	31	531	4	8	527	523	59	5.52	0.75	1.51	99.25	98.49	564	8	26	34	530	4	13	526	517	59	6.03	0.75	2.45	99.25	97.55	580	1061	8	21	1053	1040	59	0.75
NMW5010	POWNB090-10	JN893624	Fresh	Apiales	Apiaceae	Conopodium	Conopodium_majus	2010	rbcL	rbcLa-F	rbcLr590	571	44	6	50	521	4	8	517	513	59	8.76	0.77	1.54	99.23	98.46	571	9	38	47	524	4	15	520	509	59	8.23	0.76	2.86	99.24	97.14	581	1045	8	23	1037	1022	59	0.77
NMW4078	POWNA2762-12	JN893224	Herbarium	Apiales	Apiaceae	Conopodium	Conopodium_majus	1967	rbcL	rbcLa-F	rbcLr590	665	27	108	135	530	4	8	526	522	58	20.3	0.75	1.51	99.25	98.49	570	11	33	44	526	4	9	522	517	60	7.72	0.76	1.71	99.24	98.29	579	1056	8	17	1048	1039	59	0.76
NMW4080	POWNA1273-12	JN891083	Herbarium	Apiales	Apiaceae	Conopodium	Conopodium_majus	1969	rbcL	rbcLa-F	rbcLr590	563	26	1	27	536	4	14	532	522	59	4.8	0.75	2.61	99.25	97.39	568	11	30	41	527	4	8	523	519	59	7.22	0.76	1.52	99.24	98.48	581	1063	8	22	1055	1041	59	0.75
NMW4079	POWNA2763-12	JN893225	Herbarium	Apiales	Apiaceae	Conopodium	Conopodium_majus	1993	rbcL	rbcLa-F	rbcLr590	563	24	8	32	531	4	14	527	517	56	5.68	0.75	2.64	99.25	97.36	568	11	28	39	529	8	17	521	512	58	6.87	1.51	3.21	98.49	96.79	575	1060	12	31	1048	1029	57	1.13
NBGW6010	POWNB205-10	JN890876	Fresh	Apiales	Apiaceae	Conopodium	Conopodium_majus	2010	rbcL	rbcLa-F	rbcLr590	567	30	11	41	526	4	6	522	520	59	7.23	0.76	1.14	99.24	98.86	568	12	25	37	531	4	12	527	519	59	6.51	0.75	2.26	99.25	97.74	572	1057	8	18	1049	1039	59	0.76
NMW4082	POWNA1275-12	JN891085	Herbarium	Apiales	Apiaceae	Crithmum	Crithmum_maritimum	1955	rbcL	rbcLa-F	rbcLr590	565	32	2	34	531	4	6	527	525	60	6.02	0.75	1.13	99.25	98.87	568	11	31	42	526	4	10	522	516	59	7.39	0.76	1.9	99.24	98.1	579	1057	8	16	1049	1041	59	0.76
NMW247	POWNA205-10	JN891588	Herbarium	Apiales	Apiaceae	Crithmum	Crithmum_maritimum	1987	rbcL	rbcLa-F	rbcLr590	555	18	16	34	521	9	15	512	506	57	6.13	1.73	2.88	98.27	97.12	562	13	26	39	523	10	19	513	504	56	6.94	1.91	3.63	98.09	96.37	567	1044	19	34	1025	1010	57	1.82
NMW4083	POWNA1274-12	JN891084	Herbarium	Apiales	Apiaceae	Daucus	Daucus_carota	1962	rbcL	rbcLa-F	rbcLr590	563	29	1	30	533	4	10	529	523	59	5.33	0.75	1.88	99.25	98.12	571	16	41	57	514	4	7	510	507	59	9.98	0.78	1.36	99.22	98.64	576	1047	8	17	1039	1030	59	0.76
NMW261	POWNA217-10	JN892036	Herbarium	Apiales	Apiaceae	Daucus	Daucus_carota	1976	rbcL	rbcLa-F	rbcLr590	555	17	18	35	520	4	11	516	509	57	6.31	0.77	2.12	99.23	97.88	563	17	26	43	520	8	12	512	508	58	7.64	1.54	2.31	98.46	97.69	564	1040	12	23	1028	1017	57	1.15
NMW4084	POWNA1276-12	JN891086	Herbarium	Apiales	Apiaceae	Daucus	Daucus_carota	1994	rbcL	rbcLa-F	rbcLr590	572	33	15	48	524	4	5	520	519	60	8.39	0.76	0.95	99.24	99.05	570	12	29	41	529	4	7	525	522	60	7.19	0.76	1.32	99.24	98.68	573	1053	8	12	1045	1041	60	0.76
NMW6363	POWNA1489-12	JN891381	Fresh	Apiales	Apiaceae	Daucus	Daucus_carota	2011	rbcL	rbcLa-F	rbcLr590	569	33	3	36	533	9	15	524	518	57	6.33	1.69	2.81	98.31	97.19	567	12	28	40	527	4	14	523	513	59	7.05	0.76	2.66	99.24	97.34	578	1060	13	29	1047	1031	58	1.23
NMW4086	POWNA1278-12	JN891088	Herbarium	Apiales	Apiaceae	Eryngium	Eryngium_campestre		rbcL	rbcLa-F	rbcLr590	566	24	0	24	542	4	15	538	527	59	4.24	0.74	2.77	99.26	97.23	566	13	23	36	530	4	13	526	517	59	6.36	0.75	2.45	99.25	97.55	580	1072	8	28	1064	1044	59	0.75
NMW316	POWNA256-10	JN892017	Herbarium	Apiales	Apiaceae	Eryngium	Eryngium_campestre	1951	rbcL	rbcLa-F	rbcLr590	544	21	5	26	518	7	13	511	505	57	4.78	1.35	2.51	98.65	97.49	562	12	19	31	531	8	23	523	508	57	5.52	1.51	4.33	98.49	95.67	571	1049	15	36	1034	1013	57	1.43
NMW4087	POWNA1277-12	JN891087	Herbarium	Apiales	Apiaceae	Eryngium	Eryngium_maritimum	1983	rbcL	rbcLa-F	rbcLr590	573	48	35	83	490	5	17	485	473	53	14.49	1.02	3.47	98.98	96.53	574	7	70	77	497	9	52	488	445	44	13.41	1.81	10.46	98.19	89.54	556	987	14	69	973	918	49	1.42
NMW4088	POWNA1272-12	JN891082	Herbarium	Apiales	Apiaceae	Eryngium	Eryngium_maritimum	1951	rbcL	rbcLa-F	rbcLr590	566	33	3	36	530	4	7	526	523	59	6.36	0.75	1.32	99.25	98.68	568	11	32	43	525	4	7	521	518	59	7.57	0.76	1.33	99.24	98.67	579	1055	8	14	1047	1041	59	0.76
NMW6413	POWNA2776-12	JN893255	Fresh	Apiales	Apiaceae	Eryngium	Eryngium_maritimum	2011	rbcL	rbcLa-F	rbcLr590	570	34	5	39	531	4	10	527	521	58	6.84	0.75	1.88	99.25	98.12	570	9	34	43	527	4	7	523	520	59	7.54	0.76	1.33	99.24	98.67	581	1058	8	17	1050	1041	59	0.76
NMW317	POWNA257-10	JN892018	Herbarium	Apiales	Apiaceae	Eryngium	Eryngium_maritimum	1961	rbcL	rbcLa-F	rbcLr590	553	17	16	33	520	5	12	515	508	57	5.97	0.96	2.31	99.04	97.69	566	14	21	35	531	9	17	522	514	56	6.18	1.69	3.2	98.31	96.8	569	1051	14	29	1037	1022	57	1.33
NMW4089	POWNA1271-12	JN891081	Herbarium	Apiales	Apiaceae	Foeniculum	Foeniculum_vulgare	1989	rbcL	rbcLa-F	rbcLr590	562	27	2	29	533	4	5	529	528	59	5.16	0.75	0.94	99.25	99.06	567	9	35	44	523	4	8	519	515	59	7.76	0.76	1.53	99.24	98.47	580	1056	8	13	1048	1043	59	0.76
NMW4090	POWNA1482-12	JN891369	Herbarium	Apiales	Apiaceae	Foeniculum	Foeniculum_vulgare	1979	rbcL	rbcLa-F	rbcLr590	568	31	4	35	533	4	8	529	525	60	6.16	0.75	1.5	99.25	98.5	568	13	28	41	527	4	5	523	522	60	7.22	0.76	0.95	99.24	99.05	578	1060	8	13	1052	1047	60	0.75
NMW358	POWNA296-10	JN891041	Herbarium	Apiales	Apiaceae	Foeniculum	Foeniculum_vulgare	1999	rbcL	rbcLa-F	rbcLr590	555	17	16	33	522	7	15	515	507	57	5.95	1.34	2.87	98.66	97.13	563	14	21	35	528	9	20	519	508	57	6.22	1.7	3.79	98.3	96.21	567	1050	16	35	1034	1015	57	1.52
NMW4092	POWNA1480-12	JN891367	Herbarium	Apiales	Apiaceae	Heracleum	Heracleum_sphondylium	1962	rbcL	rbcLa-F	rbcLr590	571	35	8	43	528	4	7	524	521	60	7.53	0.76	1.33	99.24	98.67	575	12	38	50	525	4	6	521	519	60	8.7	0.76	1.14	99.24	98.86	576	1053	8	13	1045	1040	60	0.76
NMW4091	POWNA2421-12	JN892744	Herbarium	Apiales	Apiaceae	Heracleum	Heracleum_sphondylium	1982	rbcL	rbcLa-F	rbcLr590	569	32	4	36	533	4	11	529	522	60	6.33	0.75	2.06	99.25	97.94	569	11	28	39	530	4	8	526	522	60	6.85	0.75	1.51	99.25	98.49	579	1063	8	19	1055	1044	60	0.75
NBGW5033	POWNA353-10	JN893491	Fresh	Apiales	Apiaceae	Heracleum	Heracleum_sphondylium	2008	rbcL	rbcLa-F	rbcLr590	568	94	20	114	454	21	42	433	412	54	20.07	4.63	9.25	95.37	90.75	562	14	13	27	535	8	18	527	517	56	4.8	1.5	3.36	98.5	96.64	566	989	29	60	960	929	55	2.93
NMW4096	POWNA2021-12	JN890689	Herbarium	Apiales	Apiaceae	Meum	Meum_athamanticum	1930	rbcL	rbcLa-F	rbcLr590	994	27	446	473	521	4	5	517	516	60	47.59	0.77	0.96	99.23	99.04	570	12	31	43	527	4	10	523	517	59	7.54	0.76	1.9	99.24	98.1	569	1048	8	15	1040	1033	59	0.76
NMW4097	POWNA1478-12	JN891365	Herbarium	Apiales	Apiaceae	Oenanthe	Oenanthe_aquatica	1967	rbcL	rbcLa-F	rbcLr590	524	50	49	99	425	18	35	407	390	45	18.89	4.24	8.24	95.76	91.76	572	12	39	51	521	11	20	510	501	55	8.92	2.11	3.84	97.89	96.16	521	946	29	55	917	891	51	3.07
NMW4098	POWNA1484-12	JN891375	Herbarium	Apiales	Apiaceae	Oenanthe	Oenanthe_aquatica	1973	rbcL	rbcLa-F	rbcLr590	579	92	9	101	478	30	72	448	406	45	17.44	6.28	15.06	93.72	84.94	571	14	31	45	526	63	153	463	373	41	7.88	11.98	29.09	88.02	70.91	574	1004	93	225	911	779	43	9.26
NMW576	POWNA495-10	JN890585	Herbarium	Apiales	Apiaceae	Oenanthe	Oenanthe_aquatica	1990	rbcL	rbcLa-F	rbcLr590	560	23	14	37	523	11	17	512	506	56	6.61	2.1	3.25	97.9	96.75	562	19	20	39	523	11	22	512	501	57	6.94	2.1	4.21	97.9	95.79	563	1046	22	39	1024	1007	56	2.1
NMW4100	POWNA2093-12	JN892276	Herbarium	Apiales	Apiaceae	Oenanthe	Oenanthe_crocata	1999	rbcL	rbcLa-F	rbcLr590	574	57	63	120	454	9	34	445	420	49	20.91	1.98	7.49	98.02	92.51	569	12	31	43	526	4	8	522	518	59	7.56	0.76	1.52	99.24	98.48	526	980	13	42	967	938	55	1.33
NMW4099	POWNA2065-12	JN892220	Herbarium	Apiales	Apiaceae	Oenanthe	Oenanthe_crocata	2003	rbcL	rbcLa-F	rbcLr590	571	32	9	41	530	4	7	526	523	60	7.18	0.75	1.32	99.25	98.68	571	12	23	35	536	4	12	532	524	60	6.13	0.75	2.24	99.25	97.76	574	1066	8	19	1058	1047	60	0.75
NBGW5030	POWNA496-10	JN892368	Fresh	Apiales	Apiaceae	Oenanthe	Oenanthe_crocata	2008	rbcL	rbcLa-F	rbcLr590	563	76	17	93	470	4	7	466	463	58	16.52	0.85	1.49	99.15	98.51	550	14	15	29	521	9	14	512	507	56	5.27	1.73	2.69	98.27	97.31	565	991	13	21	978	970	57	1.31
NMW4102	POWNA2094-12	JN892277	Herbarium	Apiales	Apiaceae	Oenanthe	Oenanthe_fistulosa	1997	rbcL	rbcLa-F	rbcLr590	574	36	19	55	519	6	16	513	503	56	9.58	1.16	3.08	98.84	96.92	567	10	33	43	524	6	10	518	514	59	7.58	1.15	1.91	98.85	98.09	569	1043	12	26	1031	1017	57	1.15
NMW577	POWNA497-10	JN890586	Herbarium	Apiales	Apiaceae	Oenanthe	Oenanthe_fistulosa	2003	rbcL	rbcLa-F	rbcLr590	558	19	18	37	521	5	14	516	507	57	6.63	0.96	2.69	99.04	97.31	565	15	21	36	529	5	15	524	514	57	6.37	0.95	2.84	99.05	97.16	568	1050	10	29	1040	1021	57	0.95
NMW4103	POWNA2095-12	JN892278	Herbarium	Apiales	Apiaceae	Oenanthe	Oenanthe_lachenalii	1982	rbcL	rbcLa-F	rbcLr590	1050	30	494	524	526	4	9	522	517	58	49.9	0.76	1.71	99.24	98.29	578	13	45	58	520	4	11	516	509	57	10.03	0.77	2.12	99.23	97.88	573	1046	8	20	1038	1026	58	0.76
NMW4104	POWNA2096-12	JN892279	Herbarium	Apiales	Apiaceae	Oenanthe	Oenanthe_lachenalii	1987	rbcL	rbcLa-F	rbcLr590	571	32	6	38	533	4	7	529	526	60	6.65	0.75	1.31	99.25	98.69	575	6	43	49	526	4	6	522	520	60	8.52	0.76	1.14	99.24	98.86	587	1059	8	13	1051	1046	60	0.76
NMW578	POWNA498-10	JN890581	Herbarium	Apiales	Apiaceae	Oenanthe	Oenanthe_lachenalii	1998	rbcL	rbcLa-F	rbcLr590	557	19	17	36	521	4	13	517	508	58	6.46	0.77	2.5	99.23	97.5	565	18	20	38	527	4	14	523	513	58	6.73	0.76	2.66	99.24	97.34	566	1048	8	27	1040	1021	58	0.76
NMW6471	POWNA2427-12	JN892758	Fresh	Apiales	Apiaceae	Oenanthe	Oenanthe_lachenalii	2011	rbcL	rbcLa-F	rbcLr590	569	30	5	35	534	4	12	530	522	57	6.15	0.75	2.25	99.25	97.75	567	11	27	38	529	4	6	525	523	60	6.7	0.76	1.13	99.24	98.87	579	1063	8	18	1055	1045	58	0.75
NMW579	POWNA499-10	JN890582	Herbarium	Apiales	Apiaceae	Oenanthe	Oenanthe_pimpinelloides		rbcL	rbcLa-F	rbcLr590	545	28	3	31	514	12	18	502	496	57	5.69	2.33	3.5	97.67	96.5	565	13	37	50	515	12	22	503	493	57	8.85	2.33	4.27	97.67	95.73	569	1029	24	40	1005	989	57	2.33
NMW6192	POWNA1994-12	JN892132	Fresh	Apiales	Apiaceae	Oenanthe	Oenanthe_pimpinelloides	2011	rbcL	rbcLa-F	rbcLr590	568	33	2	35	533	4	10	529	523	57	6.16	0.75	1.88	99.25	98.12	568	15	27	42	526	4	9	522	517	59	7.39	0.76	1.71	99.24	98.29	576	1059	8	19	1051	1040	58	0.76
NMW4105	POWNA2097-12	JN892280	Herbarium	Apiales	Apiaceae	Oenanthe	Oenanthe_pimpinelloides	1991	rbcL	rbcLa-F	rbcLr590	573	33	6	39	534	4	7	530	527	60	6.81	0.75	1.31	99.25	98.69	568	10	28	38	530	4	7	526	523	60	6.69	0.75	1.32	99.25	98.68	580	1064	8	14	1056	1050	60	0.75
NMW4108	POWNA2091-12	JN892273	Herbarium	Apiales	Apiaceae	Pastinaca	Pastinaca_sativa	1988	rbcL	rbcLa-F	rbcLr590	578	51	16	67	511	9	28	502	483	47	11.59	1.76	5.48	98.24	94.52	577	6	43	49	528	4	9	524	519	57	8.49	0.76	1.7	99.24	98.3	576	1039	13	37	1026	1002	52	1.25
NMW610	POWNA518-10	JN893745	Herbarium	Apiales	Apiaceae	Pastinaca	Pastinaca_sativa	1994	rbcL	rbcLa-F	rbcLr590	554	15	18	33	521	4	10	517	511	58	5.96	0.77	1.92	99.23	98.08	563	18	26	44	519	4	10	515	509	58	7.82	0.77	1.93	99.23	98.07	563	1040	8	20	1032	1020	58	0.77
NMW6361	POWNA1490-12	JN891383	Fresh	Apiales	Apiaceae	Pastinaca	Pastinaca_sativa	2011	rbcL	rbcLa-F	rbcLr590	567	30	1	31	536	4	13	532	523	57	5.47	0.75	2.43	99.25	97.57	569	9	33	42	527	5	7	522	520	60	7.38	0.95	1.33	99.05	98.67	583	1063	9	20	1054	1043	58	0.85
NMW4107	POWNA2098-12	JN892281	Herbarium	Apiales	Apiaceae	Pastinaca	Pastinaca_sativa	1962	rbcL	rbcLa-F	rbcLr590	1050	28	502	530	520	4	4	516	516	60	50.48	0.77	0.77	99.23	99.23	565	16	17	33	532	4	10	528	522	59	5.84	0.75	1.88	99.25	98.12	564	1052	8	14	1044	1038	59	0.76
NMW4110	POWNA1945-12	JN892077	Herbarium	Apiales	Apiaceae	Petroselinum	Petroselinum_crispum	1941	rbcL	rbcLa-F	rbcLr590	563	28	13	41	522	8	20	514	502	57	7.28	1.53	3.83	98.47	96.17	569	14	34	48	521	6	16	515	505	58	8.44	1.15	3.07	98.85	96.93	568	1043	14	36	1029	1007	58	1.34
NMW620	POWNA527-10	JN890658	Herbarium	Apiales	Apiaceae	Petroselinum	Petroselinum_crispum	1952	rbcL	rbcLa-F	rbcLr590	554	25	15	40	514	8	20	506	494	56	7.22	1.56	3.89	98.44	96.11	552	13	24	37	515	13	27	502	488	55	6.7	2.52	5.24	97.48	94.76	570	1029	21	47	1008	982	55	2.04
NMW4109	POWNA2092-12	JN892274	Herbarium	Apiales	Apiaceae	Petroselinum	Petroselinum_crispum	1943	rbcL	rbcLa-F	rbcLr590	571	31	6	37	534	4	8	530	526	60	6.48	0.75	1.5	99.25	98.5	571	12	24	36	535	4	12	531	523	59	6.3	0.75	2.24	99.25	97.76	580	1069	8	20	1061	1049	60	0.75
NMW4111	POWNA1944-12	JN892076	Herbarium	Apiales	Apiaceae	Petroselinum	Petroselinum_segetum	1958	rbcL	rbcLa-F	rbcLr590	552	24	2	26	526	4	10	522	516	59	4.71	0.76	1.9	99.24	98.1	567	12	34	46	521	4	6	517	515	59	8.11	0.77	1.15	99.23	98.85	567	1047	8	16	1039	1031	59	0.76
NMW621	POWNA528-10	JN890659	Herbarium	Apiales	Apiaceae	Petroselinum	Petroselinum_segetum	1967	rbcL	rbcLa-F	rbcLr590	551	27	3	30	521	9	14	512	507	57	5.44	1.73	2.69	98.27	97.31	562	13	26	39	523	9	20	514	503	56	6.94	1.72	3.82	98.28	96.18	567	1044	18	34	1026	1010	57	1.72
NMW623	POWNA529-10	JN890749	Herbarium	Apiales	Apiaceae	Peucedanum	Peucedanum_ostruthium		rbcL	rbcLa-F	rbcLr590	637	31	93	124	513	14	41	499	472	45	19.47	2.73	7.99	97.27	92.01	565	9	81	90	475	5	22	470	453	50	15.93	1.05	4.63	98.95	95.37	572	988	19	63	969	925	47	1.92
NMW4115	POWNA1948-12	JN892079	Herbarium	Apiales	Apiaceae	Peucedanum	Peucedanum_ostruthium	1916	rbcL	rbcLa-F	rbcLr590	579	63	1	64	515	4	9	511	506	59	11.05	0.78	1.75	99.22	98.25	571	8	59	67	504	4	12	500	492	60	11.73	0.79	2.38	99.21	97.62	585	1019	8	21	1011	998	59	0.79
NMW4113	POWNA1942-12	JN892075	Herbarium	Apiales	Apiaceae	Peucedanum	Peucedanum_ostruthium	1904	rbcL	rbcLa-F	rbcLr590	568	37	3	40	528	4	7	524	521	60	7.04	0.76	1.33	99.24	98.67	571	10	37	47	524	4	10	520	514	59	8.23	0.76	1.91	99.24	98.09	579	1052	8	17	1044	1035	59	0.76
NMW4117	POWNA1946-12	JN892078	Herbarium	Apiales	Apiaceae	Pimpinella	Pimpinella_saxifraga	2007	rbcL	rbcLa-F	rbcLr590	564	30	2	32	532	4	4	528	528	59	5.67	0.75	0.75	99.25	99.25	567	18	29	47	520	4	7	516	513	59	8.29	0.77	1.35	99.23	98.65	570	1052	8	11	1044	1041	59	0.76
NMW629	POWNA538-10	JN891330	Herbarium	Apiales	Apiaceae	Pimpinella	Pimpinella_saxifraga	1991	rbcL	rbcLa-F	rbcLr590	564	25	16	41	523	4	14	519	509	57	7.27	0.76	2.68	99.24	97.32	564	20	23	43	521	7	13	514	508	57	7.62	1.34	2.5	98.66	97.5	563	1044	11	27	1033	1017	57	1.05
NMW4118	POWNA1941-12	JN892074	Herbarium	Apiales	Apiaceae	Sanicula	Sanicula_europaea	1993	rbcL	rbcLa-F	rbcLr590	570	31	11	42	528	4	5	524	523	60	7.37	0.76	0.95	99.24	99.05	568	12	30	42	526	4	8	522	518	60	7.39	0.76	1.52	99.24	98.48	573	1054	8	13	1046	1041	60	0.76
NMW4119	POWNA1940-12	JN892073	Herbarium	Apiales	Apiaceae	Sanicula	Sanicula_europaea	1978	rbcL	rbcLa-F	rbcLr590	564	30	1	31	533	4	6	529	527	59	5.5	0.75	1.13	99.25	98.87	569	12	28	40	529	4	11	525	518	59	7.03	0.76	2.08	99.24	97.92	580	1062	8	17	1054	1045	59	0.75
NMW766	POWNA653-10	JN893724	Herbarium	Apiales	Apiaceae	Sanicula	Sanicula_europaea	1999	rbcL	rbcLa-F	rbcLr590	555	19	13	32	523	4	12	519	511	57	5.77	0.76	2.29	99.24	97.71	564	17	20	37	527	7	17	520	510	57	6.56	1.33	3.23	98.67	96.77	567	1050	11	29	1039	1021	57	1.05
NMW6229	POWNA2637-12	JN891682	Fresh	Apiales	Apiaceae	Sanicula	Sanicula_europaea	2011	rbcL	rbcLa-F	rbcLr590	564	28	7	35	529	4	8	525	521	56	6.21	0.76	1.51	99.24	98.49	568	6	27	33	535	4	15	531	520	58	5.81	0.75	2.8	99.25	97.2	579	1064	8	23	1056	1041	57	0.75
NMW859	POWNA660-10	JN892790	Herbarium	Apiales	Apiaceae	Scandix	Scandix_pecten-veneris	2003	rbcL	rbcLa-F	rbcLr590	547	28	5	33	514	6	12	508	502	58	6.03	1.17	2.33	98.83	97.67	561	13	32	45	516	12	21	504	495	56	8.02	2.33	4.07	97.67	95.93	569	1030	18	33	1012	997	57	1.75
NMW4122	POWNA2398-12	JN892713	Herbarium	Apiales	Apiaceae	Silaum	Silaum_silaus	1979	rbcL	rbcLa-F	rbcLr590	571	33	11	44	527	4	5	523	522	60	7.71	0.76	0.95	99.24	99.05	568	13	28	41	527	4	7	523	520	60	7.22	0.76	1.33	99.24	98.67	572	1054	8	12	1046	1042	60	0.76
NMW833	POWNA678-10	JN891403	Herbarium	Apiales	Apiaceae	Silaum	Silaum_silaus	1985	rbcL	rbcLa-F	rbcLr590	557	19	18	37	520	4	11	516	509	58	6.64	0.77	2.12	99.23	97.88	563	20	20	40	523	5	14	518	509	57	7.1	0.96	2.68	99.04	97.32	563	1043	9	25	1034	1018	58	0.86
NMW4123	POWNA3149-12	JN893790	Herbarium	Apiales	Apiaceae	Silaum	Silaum_silaus	1992	rbcL	rbcLa-F	rbcLr590	566	28	4	32	534	4	10	530	524	58	5.65	0.75	1.87	99.25	98.13	567	10	26	36	531	4	10	527	521	59	6.35	0.75	1.88	99.25	98.12	579	1065	8	20	1057	1045	59	0.75
NMW4125	POWNA2402-12	JN890547	Herbarium	Apiales	Apiaceae	Sison	Sison_amomum	1992	rbcL	rbcLa-F	rbcLr590	565	29	176	205	360	4	10	356	350	54	36.28	1.11	2.78	98.89	97.22	566	14	26	40	526	4	4	522	522	60	7.07	0.76	0.76	99.24	99.24	526	886	8	14	878	872	58	0.9
NMW717	POWNA689-10	JN892989	Herbarium	Apiales	Apiaceae	Sison	Sison_amomum	1994	rbcL	rbcLa-F	rbcLr590	554	18	15	33	521	4	12	517	509	58	5.96	0.77	2.3	99.23	97.7	552	14	24	38	514	7	14	507	500	57	6.88	1.36	2.72	98.64	97.28	566	1035	11	26	1024	1009	57	1.06
NMW4124	POWNA2401-12	JN892716	Herbarium	Apiales	Apiaceae	Sison	Sison_amomum	2005	rbcL	rbcLa-F	rbcLr590	565	30	22	52	513	4	6	509	507	59	9.2	0.78	1.17	99.22	98.83	568	12	23	35	533	4	13	529	520	59	6.16	0.75	2.44	99.25	97.56	559	1046	8	19	1038	1027	59	0.76
NMW4127	POWNA2400-12	JN892715	Herbarium	Apiales	Apiaceae	Smyrnium	Smyrnium_olusatrum	1976	rbcL	rbcLa-F	rbcLr590	581	70	5	75	506	7	32	499	474	47	12.91	1.38	6.32	98.62	93.68	573	12	63	75	498	4	8	494	490	59	13.09	0.8	1.61	99.2	98.39	577	1004	11	40	993	964	53	1.1
NMW6006	POWNA1809-12	JN891883	Fresh	Apiales	Apiaceae	Smyrnium	Smyrnium_olusatrum	2011	rbcL	rbcLa-F	rbcLr590	566	30	5	35	531	4	9	527	522	57	6.18	0.75	1.69	99.25	98.31	570	12	30	42	528	4	11	524	517	59	7.37	0.76	2.08	99.24	97.92	578	1059	8	20	1051	1039	58	0.76
NMW4128	POWNA2403-12	JN892718	Herbarium	Apiales	Apiaceae	Torilis	Torilis_arvensis	1978	rbcL	rbcLa-F	rbcLr590	572	34	5	39	533	4	5	529	528	60	6.82	0.75	0.94	99.25	99.06	566	10	28	38	528	4	7	524	521	60	6.71	0.76	1.33	99.24	98.67	581	1061	8	12	1053	1049	60	0.75
NMW971	POWNA755-10	JN890678	Herbarium	Apiales	Apiaceae	Torilis	Torilis_arvensis	2001	rbcL	rbcLa-F	rbcLr590	556	16	18	34	522	4	11	518	511	58	6.12	0.77	2.11	99.23	97.89	561	18	19	37	524	7	15	517	509	57	6.6	1.34	2.86	98.66	97.14	564	1046	11	26	1035	1020	58	1.05
NMW4129	POWNA2404-12	JN892719	Herbarium	Apiales	Apiaceae	Torilis	Torilis_arvensis	1953	rbcL	rbcLa-F	rbcLr590	567	33	8	41	526	4	8	522	518	59	7.23	0.76	1.52	99.24	98.48	572	3	31	34	538	4	10	534	528	59	5.94	0.74	1.86	99.26	98.14	585	1064	8	18	1056	1046	59	0.75
NMW972	POWNA756-10	JN890679	Herbarium	Apiales	Apiaceae	Torilis	Torilis_japonica	1993	rbcL	rbcLa-F	rbcLr590	556	22	15	37	519	4	11	515	508	57	6.65	0.77	2.12	99.23	97.88	563	15	24	39	524	10	17	514	507	56	6.93	1.91	3.24	98.09	96.76	567	1043	14	28	1029	1015	57	1.34
NMW4130	POWNA2254-12	JN892515	Herbarium	Apiales	Apiaceae	Torilis	Torilis_japonica	1981	rbcL	rbcLa-F	rbcLr590	571	38	11	49	522	4	7	518	515	59	8.58	0.77	1.34	99.23	98.66	568	11	27	38	530	4	10	526	520	59	6.69	0.75	1.89	99.25	98.11	573	1052	8	17	1044	1035	59	0.76
NMW4131	POWNA2253-12	JN892514	Herbarium	Apiales	Apiaceae	Torilis	Torilis_japonica	1970	rbcL	rbcLa-F	rbcLr590	577	32	7	39	538	4	11	534	527	59	6.76	0.74	2.04	99.26	97.96	568	11	27	38	530	4	8	526	522	60	6.69	0.75	1.51	99.25	98.49	580	1068	8	19	1060	1049	60	0.75
NMW973	POWNA757-10	JN891349	Herbarium	Apiales	Apiaceae	Torilis	Torilis_nodosa	1990	rbcL	rbcLa-F	rbcLr590	561	23	13	36	525	4	17	521	508	57	6.42	0.76	3.24	99.24	96.76	566	17	25	42	524	5	12	519	512	57	7.42	0.95	2.29	99.05	97.71	567	1049	9	29	1040	1020	57	0.86
NMW4132	POWNA2256-12	JN892517	Herbarium	Apiales	Apiaceae	Torilis	Torilis_nodosa	1947	rbcL	rbcLa-F	rbcLr590	571	33	13	46	525	4	5	521	520	60	8.06	0.76	0.95	99.24	99.05	570	11	29	40	530	4	12	526	518	59	7.02	0.75	2.26	99.25	97.74	572	1055	8	17	1047	1038	60	0.76
NMW4133	POWNA2255-12	JN892516	Herbarium	Apiales	Apiaceae	Torilis	Torilis_nodosa	1955	rbcL	rbcLa-F	rbcLr590	569	34	7	41	528	4	5	524	523	60	7.21	0.76	0.95	99.24	99.05	564	9	27	36	528	4	10	524	518	59	6.38	0.76	1.89	99.24	98.11	575	1056	8	15	1048	1041	59	0.76
NMW4134	POWNA2250-12	JN892511	Herbarium	Apiales	Araliaceae	Hedera	Hedera_helix	1973	rbcL	rbcLa-F	rbcLr590	576	45	14	59	517	4	4	513	513	60	10.24	0.77	0.77	99.23	99.23	577	7	44	51	526	4	6	522	520	60	8.84	0.76	1.14	99.24	98.86	577	1043	8	10	1035	1033	60	0.77
NMW883	POWNA346-10	JN893032	Herbarium	Apiales	Araliaceae	Hedera	Hedera_helix	1989	rbcL	rbcLa-F	rbcLr590	553	18	13	31	522	4	11	518	511	57	5.61	0.77	2.11	99.23	97.89	562	16	20	36	526	4	16	522	510	58	6.41	0.76	3.04	99.24	96.96	565	1048	8	27	1040	1021	57	0.76
NMW4135	POWNA2249-12	JN892510	Herbarium	Apiales	Araliaceae	Hedera	Hedera_helix	1992	rbcL	rbcLa-F	rbcLr590	574	35	12	47	527	11	29	516	498	53	8.19	2.09	5.5	97.91	94.5	573	7	27	34	539	4	13	535	526	59	5.93	0.74	2.41	99.26	97.59	580	1066	15	42	1051	1024	56	1.41
NMW436	POWNA365-10	JN892731	Herbarium	Apiales	Araliaceae	Hydrocotyle	Hydrocotyle_vulgaris	2002	rbcL	rbcLa-F	rbcLr590	895	29	344	373	522	4	19	518	503	51	41.68	0.77	3.64	99.23	96.36	898	339	73	412	486	18	89	468	397	39	45.88	3.7	18.31	96.3	81.69	573	1008	22	108	986	900	45	2.18
NMW4093	POWNA1481-12	JN891368	Herbarium	Apiales	Araliaceae	Hydrocotyle	Hydrocotyle_vulgaris	1983	rbcL	rbcLa-F	rbcLr590	570	33	9	42	528	4	11	524	517	53	7.37	0.76	2.08	99.24	97.92	571	14	33	47	524	4	8	520	516	58	8.23	0.76	1.53	99.24	98.47	572	1052	8	19	1044	1033	56	0.76
NMW4094	POWNA1479-12	JN891366	Herbarium	Apiales	Araliaceae	Hydrocotyle	Hydrocotyle_vulgaris	1965	rbcL	rbcLa-F	rbcLr590	562	28	1	29	533	4	7	529	526	59	5.16	0.75	1.31	99.25	98.69	565	12	31	43	522	4	10	518	512	59	7.61	0.77	1.92	99.23	98.08	579	1055	8	17	1047	1038	59	0.76
NMW4136	POWNA2252-12	JN890731	Herbarium	Aquifoliales	Aquifoliaceae	Ilex	Ilex_aquifolium	1998	rbcL	rbcLa-F	rbcLr590	572	51	11	62	510	4	5	506	505	60	10.84	0.78	0.98	99.22	99.02	569	13	28	41	528	4	10	524	518	59	7.21	0.76	1.89	99.24	98.11	572	1038	8	15	1030	1023	60	0.77
NMW4137	POWNA2251-12	JN892512	Herbarium	Aquifoliales	Aquifoliaceae	Ilex	Ilex_aquifolium	1989	rbcL	rbcLa-F	rbcLr590	573	35	10	45	528	4	6	524	522	60	7.85	0.76	1.14	99.24	98.86	570	5	28	33	537	4	6	533	531	60	5.79	0.74	1.12	99.26	98.88	581	1065	8	12	1057	1053	60	0.75
NBGW3032	POWNA373-10	JN893708	Fresh	Aquifoliales	Aquifoliaceae	Ilex	Ilex_aquifolium	2008	rbcL	rbcLa-F	rbcLr590	554	17	14	31	523	7	13	516	510	58	5.6	1.34	2.49	98.66	97.51	552	14	17	31	521	6	16	515	505	57	5.62	1.15	3.07	98.85	96.93	569	1044	13	29	1031	1015	57	1.25
NMW5005	POWNB085-10	JN890596	Fresh	Asparagales	Amaryllidaceae	Allium	Allium_ampeloprasum	2010	rbcL	rbcLa-F	rbcLr590	567	38	44	82	485	22	119	463	366	37	14.46	4.54	24.54	95.46	75.46	565	7	44	51	514	6	43	508	471	46	9.03	1.17	8.37	98.83	91.63	539	999	28	162	971	837	42	2.8
NMW3790	POWNA2890-12	JN893388	Herbarium	Asparagales	Amaryllidaceae	Allium	Allium_oleraceum	1945	rbcL	rbcLa-F	rbcLr590	569	37	3	40	529	4	6	525	523	58	7.03	0.76	1.13	99.24	98.87	569	13	35	48	521	4	9	517	512	56	8.44	0.77	1.73	99.23	98.27	577	1050	8	15	1042	1035	57	0.76
NMW3789	POWNA1788-12	JN893124	Herbarium	Asparagales	Amaryllidaceae	Allium	Allium_oleraceum	1985	rbcL	rbcLa-F	rbcLr590	568	30	40	70	498	19	93	479	405	44	12.32	3.82	18.67	96.18	81.33	568	13	34	47	521	46	180	475	341	32	8.27	8.83	34.55	91.17	65.45	545	1019	65	273	954	746	38	6.38
NMW026	POWNA024-10	JN890785	Herbarium	Asparagales	Amaryllidaceae	Allium	Allium_schoenoprasum	1994	rbcL	rbcLa-F	rbcLr590	645	23	102	125	520	4	32	516	488	46	19.38	0.77	6.15	99.23	93.85	607	58	25	83	524	4	23	520	501	50	13.67	0.76	4.39	99.24	95.61	568	1044	8	55	1036	989	48	0.77
NMW027	POWNA025-10	JN890786	Herbarium	Asparagales	Amaryllidaceae	Allium	Allium_ursinum	1993	rbcL	rbcLa-F	rbcLr590	646	30	100	130	516	5	31	511	485	45	20.12	0.97	6.01	99.03	93.99	614	70	24	94	520	5	19	515	501	49	15.31	0.96	3.65	99.04	96.35	560	1036	10	50	1026	986	47	0.97
NMW3793	POWNA2891-12	JN893389	Herbarium	Asparagales	Amaryllidaceae	Allium	Allium_ursinum	1976	rbcL	rbcLa-F	rbcLr590	577	55	5	60	517	10	12	507	505	56	10.4	1.93	2.32	98.07	97.68	570	10	34	44	526	4	6	522	520	59	7.72	0.76	1.14	99.24	98.86	583	1043	14	18	1029	1025	58	1.34
NMW6164	POWNA1192-12	JN890947	Fresh	Asparagales	Amaryllidaceae	Allium	Allium_ursinum	2011	rbcL	rbcLa-F	rbcLr590	565	27	8	35	530	4	8	526	522	57	6.19	0.75	1.51	99.25	98.49	566	12	29	41	525	4	4	521	521	59	7.24	0.76	0.76	99.24	99.24	574	1055	8	12	1047	1043	58	0.76
NMW6215	POWNA3136-12	JN893772	Fresh	Asparagales	Amaryllidaceae	Allium	Allium_ursinum	2011	rbcL	rbcLa-F	rbcLr590	569	32	8	40	529	4	7	525	522	58	7.03	0.76	1.32	99.24	98.68	568	13	28	41	527	4	6	523	521	60	7.22	0.76	1.14	99.24	98.86	574	1056	8	13	1048	1043	59	0.76
NMW3797	POWNA2889-12	JN893387	Herbarium	Asparagales	Amaryllidaceae	Allium	Allium_vineale	1930	rbcL	rbcLa-F	rbcLr590	564	26	13	39	525	4	6	521	519	59	6.91	0.76	1.14	99.24	98.86	566	17	26	43	523	4	11	519	512	59	7.6	0.76	2.1	99.24	97.9	564	1048	8	17	1040	1031	59	0.76
NMW567	POWNA491-10	JN890813	Herbarium	Asparagales	Amaryllidaceae	Narcissus	Narcissus_pseudonarcissus	1994	rbcL	rbcLa-F	rbcLr590	625	36	73	109	516	4	30	512	486	46	17.44	0.78	5.81	99.22	94.19	616	68	23	91	525	4	12	521	513	53	14.77	0.76	2.29	99.24	97.71	568	1041	8	42	1033	999	49	0.77
NMW067	POWNA057-10	JN891750	Herbarium	Asparagales	Asparagaceae	Asparagus	Asparagus_officinalis	2001	rbcL	rbcLa-F	rbcLr590	544	22	1	23	521	4	29	517	492	45	4.23	0.77	5.57	99.23	94.43	561	20	24	44	517	5	9	512	508	56	7.84	0.97	1.74	99.03	98.26	562	1038	9	38	1029	1000	51	0.87
NMW3798	POWNA2896-12	JN893394	Herbarium	Asparagales	Asparagaceae	Asparagus	Asparagus_officinalis	1996	rbcL	rbcLa-F	rbcLr590	568	33	5	38	530	9	18	521	512	58	6.69	1.7	3.4	98.3	96.6	573	7	36	43	530	4	19	526	511	56	7.5	0.75	3.58	99.25	96.42	586	1060	13	37	1047	1023	57	1.23
NMW3799	POWNA2897-12	JN893395	Herbarium	Asparagales	Asparagaceae	Asparagus	Asparagus_officinalis	1997	rbcL	rbcLa-F	rbcLr590	579	43	8	51	528	4	6	524	522	60	8.81	0.76	1.14	99.24	98.86	570	10	30	40	530	4	5	526	525	60	7.02	0.75	0.94	99.25	99.06	579	1058	8	11	1050	1047	60	0.76
NMW3801	POWNA1877-12	JN891971	Herbarium	Asparagales	Asparagaceae	Asparagus	Asparagus_prostratus	1933	rbcL	rbcLa-F	rbcLr590	577	91	9	100	477	4	11	473	466	56	17.33	0.84	2.31	99.16	97.69	569	0	89	89	480	4	4	476	476	58	15.64	0.83	0.83	99.17	99.17	587	957	8	15	949	942	57	0.84
NMW068	POWNA058-10	JN891745	Herbarium	Asparagales	Asparagaceae	Asparagus	Asparagus_prostratus	1999	rbcL	rbcLa-F	rbcLr590	561	23	17	40	521	4	34	517	487	44	7.13	0.77	6.53	99.23	93.47	547	5	31	36	511	4	28	507	483	49	6.58	0.78	5.48	99.22	94.52	562	1032	8	62	1024	970	47	0.78
NMW6332	POWNA2955-12	JN893530	Fresh	Asparagales	Asparagaceae	Convallaria	Convallaria_majalis	2011	rbcL	rbcLa-F	rbcLr590	565	28	10	38	527	4	13	523	514	55	6.73	0.76	2.47	99.24	97.53	570	16	35	51	519	4	7	515	512	55	8.95	0.77	1.35	99.23	98.65	568	1046	8	20	1038	1026	55	0.76
NMW5003	POWNB091-10	JN890598	Fresh	Asparagales	Asparagaceae	Convallaria	Convallaria_majalis	2010	rbcL	rbcLa-F	rbcLr590	566	31	13	44	522	5	10	517	512	59	7.77	0.96	1.92	99.04	98.08	568	17	32	49	519	4	7	515	512	58	8.63	0.77	1.35	99.23	98.65	566	1041	9	17	1032	1024	58	0.86
NMW3804	POWNA1879-12	JN891973	Herbarium	Asparagales	Asparagaceae	Convallaria	Convallaria_majalis	1959	rbcL	rbcLa-F	rbcLr590	560	25	7	32	528	4	6	524	522	59	5.71	0.76	1.14	99.24	98.86	569	15	27	42	527	4	7	523	520	60	7.38	0.76	1.33	99.24	98.67	572	1055	8	13	1047	1042	60	0.76
NMW3806	POWNA1880-12	JN891975	Herbarium	Asparagales	Asparagaceae	Convallaria	Convallaria_majalis	1991	rbcL	rbcLa-F	rbcLr590	563	26	13	39	524	4	7	520	517	59	6.93	0.76	1.34	99.24	98.66	565	12	28	40	525	4	5	521	520	60	7.08	0.76	0.95	99.24	99.05	570	1049	8	12	1041	1037	60	0.76
NBGW6003	POWNB201-10	JN892600	Fresh	Asparagales	Asparagaceae	Hyacinthoides	Hyacinthoides_nonscripta	2010	rbcL	rbcLa-F	rbcLr590	566	29	13	42	524	4	5	520	519	60	7.42	0.76	0.95	99.24	99.05	570	16	33	49	521	4	5	517	516	60	8.6	0.77	0.96	99.23	99.04	567	1045	8	10	1037	1035	60	0.77
NBGW6024	POWNB151-10	JN892558	Fresh	Asparagales	Asparagaceae	Hyacinthoides	Hyacinthoides_nonscripta	2010	rbcL	rbcLa-F	rbcLr590	565	26	14	40	525	4	10	521	515	58	7.08	0.76	1.9	99.24	98.1	568	11	33	44	524	4	8	520	516	59	7.75	0.76	1.53	99.24	98.47	571	1049	8	18	1041	1031	59	0.76
NMW6254	POWNA1918-12	JN892824	Fresh	Asparagales	Asparagaceae	Hyacinthoides	Hyacinthoides_nonscripta	2011	rbcL	rbcLa-F	rbcLr590	565	27	8	35	530	4	7	526	523	59	6.19	0.75	1.32	99.25	98.68	564	13	29	42	522	4	5	518	517	60	7.45	0.77	0.96	99.23	99.04	573	1052	8	12	1044	1040	59	0.76
NBGW7214	POWNA1163-12	JN890904	Fresh	Asparagales	Asparagaceae	Hyacinthoides	Hyacinthoides_nonscripta	2011	rbcL	rbcLa-F	rbcLr590	563	29	6	35	528	4	6	524	522	58	6.22	0.76	1.14	99.24	98.86	568	10	28	38	530	4	8	526	522	60	6.69	0.75	1.51	99.25	98.49	576	1058	8	14	1050	1044	59	0.76
NMW6224	POWNA2298-12	JN893055	Fresh	Asparagales	Asparagaceae	Hyacinthoides	Hyacinthoides_nonscripta	2011	rbcL	rbcLa-F	rbcLr590	564	26	2	28	536	4	8	532	528	59	4.96	0.75	1.49	99.25	98.51	568	10	28	38	530	4	8	526	522	60	6.69	0.75	1.51	99.25	98.49	582	1066	8	16	1058	1050	59	0.75
NMW6225	POWNA2297-12	JN893054	Fresh	Asparagales	Asparagaceae	Hyacinthoides	Hyacinthoides_nonscripta	2011	rbcL	rbcLa-F	rbcLr590	564	28	4	32	532	4	9	528	523	58	5.67	0.75	1.69	99.25	98.31	567	11	26	37	530	4	8	526	522	60	6.53	0.75	1.51	99.25	98.49	580	1062	8	17	1054	1045	59	0.75
NMW3822	POWNA2176-12	JN891819	Herbarium	Asparagales	Asparagaceae	Polygonatum	Polygonatum_multiflorum	1988	rbcL	rbcLa-F	rbcLr590	567	31	8	39	528	24	72	504	456	45	6.88	4.55	13.64	95.45	86.36	566	9	47	56	510	25	62	485	448	46	9.89	4.9	12.16	95.1	87.84	574	1038	49	134	989	904	45	4.72
NMW6034	POWNA1564-12	JN891491	Fresh	Asparagales	Asparagaceae	Polygonatum	Polygonatum_multiflorum	2011	rbcL	rbcLa-F	rbcLr590	567	31	3	34	533	4	8	529	525	58	6	0.75	1.5	99.25	98.5	566	9	31	40	526	4	8	522	518	60	7.07	0.76	1.52	99.24	98.48	582	1059	8	16	1051	1043	59	0.76
NMW3824	POWNA2181-12	JN891841	Herbarium	Asparagales	Asparagaceae	Polygonatum	Polygonatum_multiflorum	2000	rbcL	rbcLa-F	rbcLa-R	571	26	19	45	526	4	7	522	519	58	7.88	0.76	1.33	99.24	98.67	578	18	19	37	541	4	8	537	533	59	6.4	0.74	1.48	99.26	98.52	572	1067	8	15	1059	1052	59	0.75
NMW5312	POWNB112-10	JN890573	Fresh	Asparagales	Asparagaceae	Polygonatum	Polygonatum_odoratum	2010	rbcL	rbcLa-F	rbcLr590	565	24	11	35	530	4	7	526	523	59	6.19	0.75	1.32	99.25	98.68	569	16	33	49	520	4	6	516	514	59	8.61	0.77	1.15	99.23	98.85	571	1050	8	13	1042	1037	59	0.76
NMW6328	POWNA2785-12	JN893756	Fresh	Asparagales	Asparagaceae	Polygonatum	Polygonatum_odoratum	2011	rbcL	rbcLa-F	rbcLr590	566	30	6	36	530	4	7	526	523	58	6.36	0.75	1.32	99.25	98.68	569	6	33	39	530	4	9	526	521	59	6.85	0.75	1.7	99.25	98.3	583	1060	8	16	1052	1044	59	0.75
NMW866	POWNA625-10	JN892146	Herbarium	Asparagales	Asparagaceae	Ruscus	Ruscus_aculeatus	1982	rbcL	rbcLa-F	rbcLr590	658	32	112	144	514	4	19	510	495	46	21.88	0.78	3.7	99.22	96.3	569	9	54	63	506	4	18	502	488	47	11.07	0.79	3.56	99.21	96.44	574	1020	8	37	1012	983	46	0.78
NMW3829	POWNA2186-12	JN892402	Herbarium	Asparagales	Asparagaceae	Ruscus	Ruscus_aculeatus	2006	rbcL	rbcLa-F	rbcLr590	561	28	4	32	529	4	8	525	521	59	5.7	0.76	1.51	99.24	98.49	566	14	28	42	524	4	8	520	516	59	7.42	0.76	1.53	99.24	98.47	575	1053	8	16	1045	1037	59	0.76
NMW3831	POWNA2040-12	JN892189	Herbarium	Asparagales	Asparagaceae	Scilla	Scilla_autumnalis	1959	rbcL	rbcLa-F	rbcLr590	570	64	3	67	503	29	83	474	420	47	11.75	5.77	16.5	94.23	83.5	573	34	60	94	479	60	124	419	355	43	16.4	12.53	25.89	87.47	74.11	560	982	89	207	893	775	45	9.06
NMW5247	POWNB105-10	JN893435	Fresh	Asparagales	Asparagaceae	Scilla	Scilla_autumnalis	2010	rbcL	rbcLa-F	rbcLr590	564	29	9	38	526	4	6	522	520	59	6.74	0.76	1.14	99.24	98.86	569	14	33	47	522	4	5	518	517	59	8.26	0.77	0.96	99.23	99.04	571	1048	8	11	1040	1037	59	0.76
NMW5114	POWNB045-10	JN891029	Fresh	Asparagales	Asparagaceae	Scilla	Scilla_verna	2010	rbcL	rbcLa-F	rbcLr590	568	28	15	43	525	4	9	521	516	59	7.57	0.76	1.71	99.24	98.29	567	15	31	46	521	4	6	517	515	59	8.11	0.77	1.15	99.23	98.85	569	1046	8	15	1038	1031	59	0.76
NBGW6042	POWNB163-10	JN893558	Fresh	Asparagales	Asparagaceae	Scilla	Scilla_verna	2010	rbcL	rbcLa-F	rbcLr590	566	26	16	42	524	4	10	520	514	58	7.42	0.76	1.91	99.24	98.09	567	9	25	34	533	4	13	529	520	58	6	0.75	2.44	99.25	97.56	570	1057	8	23	1049	1034	58	0.76
NMW421	POWNA376-10	JN892524	Herbarium	Asparagales	Iridaceae	Iris	Iris_foetidissima	1986	rbcL	rbcLa-F	rbcLr590	643	28	96	124	519	5	35	514	484	45	19.28	0.96	6.74	99.04	93.26	641	93	25	118	523	4	12	519	511	53	18.41	0.76	2.29	99.24	97.71	570	1042	9	47	1033	995	49	0.86
NBGW4036	POWNA377-10	JN890996	Fresh	Asparagales	Iridaceae	Iris	Iris_pseudacorus	2008	rbcL	rbcLa-F	rbcLr590	553	17	14	31	522	12	21	510	501	52	5.61	2.3	4.02	97.7	95.98	638	89	22	111	527	8	23	519	504	52	17.4	1.52	4.36	98.48	95.64	574	1049	20	44	1029	1005	52	1.91
NMW3785	POWNA2685-12	JN893113	Herbarium	Asparagales	Iridaceae	Iris	Iris_pseudacorus	1968	rbcL	rbcLa-F	rbcLr590	567	34	0	34	533	4	8	529	525	59	6	0.75	1.5	99.25	98.5	573	13	38	51	522	4	5	518	517	60	8.9	0.77	0.96	99.23	99.04	582	1055	8	13	1047	1042	60	0.76
NMW3784	POWNA2686-12	JN893114	Herbarium	Asparagales	Iridaceae	Iris	Iris_pseudacorus	1982	rbcL	rbcLa-F	rbcLr590	571	22	12	34	537	4	11	533	526	60	5.95	0.74	2.05	99.26	97.95	566	11	24	35	531	4	8	527	523	59	6.18	0.75	1.51	99.25	98.49	575	1068	8	19	1060	1049	59	0.75
NMW6404	POWNA2603-12	JN892999	Fresh	Asparagales	Orchidaceae	Anacamptis	Anacamptis_pyramidalis	2011	rbcL	rbcLa-F	rbcLr590	568	29	10	39	529	4	10	525	519	56	6.87	0.76	1.89	99.24	98.11	569	11	31	42	527	4	6	523	521	60	7.38	0.76	1.14	99.24	98.86	576	1056	8	16	1048	1040	58	0.76
NMW6396	POWNA1353-12	JN891189	Fresh	Asparagales	Orchidaceae	Anacamptis	Anacamptis_pyramidalis	2011	rbcL	rbcLa-F	rbcLr590	564	27	6	33	531	4	10	527	521	57	5.85	0.75	1.88	99.25	98.12	564	10	22	32	532	4	11	528	521	60	5.67	0.75	2.07	99.25	97.93	576	1063	8	21	1055	1042	58	0.75
NMW5105	POWNB035-10	JN890805	Fresh	Asparagales	Orchidaceae	Coeloglossum	Coeloglossum_viride	2010	rbcL	rbcLa-F	rbcLr590	567	29	10	39	528	4	9	524	519	59	6.88	0.76	1.7	99.24	98.3	570	1	29	30	540	4	11	536	529	59	5.26	0.74	2.04	99.26	97.96	584	1068	8	20	1060	1048	59	0.75
NBGW2029	POWNA209-10	JN893314	Fresh	Asparagales	Orchidaceae	Dactylorhiza	Dactylorhiza_fuchsii	2008	rbcL	rbcLa-F	rbcLr590	555	22	14	36	519	4	14	515	505	53	6.49	0.77	2.7	99.23	97.3	637	91	23	114	523	9	20	514	503	54	17.9	1.72	3.82	98.28	96.18	571	1042	13	34	1029	1008	53	1.25
NMW3847	POWNA1225-12	JN890995	Herbarium	Asparagales	Orchidaceae	Dactylorhiza	Dactylorhiza_fuchsii	1978	rbcL	rbcLa-F	rbcLa-R	586	66	0	66	520	3	9	517	511	59	11.26	0.58	1.73	99.42	98.27	585	6	69	75	510	4	8	506	502	58	12.82	0.78	1.57	99.22	98.43	597	1030	7	17	1023	1013	59	0.68
NBGW6095	POWNB172-10	JN890983	Fresh	Asparagales	Orchidaceae	Dactylorhiza	Dactylorhiza_fuchsii	2010	rbcL	rbcLa-F	rbcLr590	567	31	9	40	527	4	8	523	519	60	7.05	0.76	1.52	99.24	98.48	567	9	34	43	524	4	7	520	517	59	7.58	0.76	1.34	99.24	98.66	576	1051	8	15	1043	1036	60	0.76
NBGW6064	POWNB221-10	JN890700	Fresh	Asparagales	Orchidaceae	Dactylorhiza	Dactylorhiza_incarnata	2010	rbcL	rbcLa-F	rbcLr590	858	26	311	337	521	4	8	517	513	56	39.28	0.77	1.54	99.23	98.46	820	273	22	295	525	4	17	521	508	53	35.98	0.76	3.24	99.24	96.76	564	1046	8	25	1038	1021	55	0.76
NMW253	POWNA210-10	JN891813	Herbarium	Asparagales	Orchidaceae	Dactylorhiza	Dactylorhiza_incarnata	1984	rbcL	rbcLa-F	rbcLr590	566	55	10	65	501	9	64	492	437	40	11.48	1.8	12.77	98.2	87.23	562	14	71	85	477	6	34	471	443	48	15.12	1.26	7.13	98.74	92.87	571	978	15	98	963	880	44	1.53
NMW6350	POWNA1003-12	JN890672	Fresh	Asparagales	Orchidaceae	Dactylorhiza	Dactylorhiza_incarnata	2011	rbcL	rbcLa-F	rbcLr590	568	31	7	38	530	4	6	526	524	59	6.69	0.75	1.13	99.25	98.87	567	14	26	40	527	4	7	523	520	60	7.05	0.76	1.33	99.24	98.67	575	1057	8	13	1049	1044	59	0.76
NBGW2027	POWNA211-10	JN893308	Fresh	Asparagales	Orchidaceae	Dactylorhiza	Dactylorhiza_maculata	2008	rbcL	rbcLa-F	rbcLr590	561	26	13	39	522	7	19	515	503	54	6.95	1.34	3.64	98.66	96.36	566	18	27	45	521	8	19	513	502	54	7.95	1.54	3.65	98.46	96.35	568	1043	15	38	1028	1005	54	1.44
NMW6343	POWNA1152-12	JN890892	Fresh	Asparagales	Orchidaceae	Dactylorhiza	Dactylorhiza_maculata	2011	rbcL	rbcLa-F	rbcLr590	567	31	6	37	530	4	8	526	522	58	6.53	0.75	1.51	99.25	98.49	568	10	32	42	526	4	7	522	519	60	7.39	0.76	1.33	99.24	98.67	579	1056	8	15	1048	1041	59	0.76
NMW6344	POWNA1153-12	JN890893	Fresh	Asparagales	Orchidaceae	Dactylorhiza	Dactylorhiza_maculata	2011	rbcL	rbcLa-F	rbcLr590	570	31	14	45	525	4	12	521	513	56	7.89	0.76	2.29	99.24	97.71	567	7	31	38	529	4	8	525	521	59	6.7	0.76	1.51	99.24	98.49	574	1054	8	20	1046	1034	58	0.76
NMW254	POWNA212-10	JN891332	Herbarium	Asparagales	Orchidaceae	Dactylorhiza	Dactylorhiza_praetermissa	1994	rbcL	rbcLa-F	rbcLr590	645	31	97	128	517	6	57	511	460	42	19.84	1.16	11.03	98.84	88.97	610	64	42	106	504	4	14	500	490	51	17.38	0.79	2.78	99.21	97.22	566	1021	10	71	1011	950	46	0.98
NMW6190	POWNA1992-12	JN892130	Fresh	Asparagales	Orchidaceae	Dactylorhiza	Dactylorhiza_praetermissa	2011	rbcL	rbcLa-F	rbcLr590	566	32	3	35	531	4	7	527	524	58	6.18	0.75	1.32	99.25	98.68	569	9	31	40	529	4	8	525	521	60	7.03	0.76	1.51	99.24	98.49	580	1060	8	15	1052	1045	59	0.75
NMW3854	POWNA1084-12	JN890773	Herbarium	Asparagales	Orchidaceae	Dactylorhiza	Dactylorhiza_praetermissa	1984	rbcL	rbcLa-F	rbcLr590	572	48	0	48	524	3	7	521	517	59	8.39	0.57	1.34	99.43	98.66	568	6	30	36	532	7	13	525	519	59	6.34	1.32	2.44	98.68	97.56	587	1056	10	20	1046	1036	59	0.95
NMW255	POWNA213-10	JN891809	Herbarium	Asparagales	Orchidaceae	Dactylorhiza	Dactylorhiza_purpurella	1994	rbcL	rbcLa-F	rbcLr590	571	59	18	77	494	15	96	479	398	37	13.49	3.04	19.43	96.96	80.57	564	37	72	109	455	15	80	440	375	39	19.33	3.3	17.58	96.7	82.42	550	949	30	176	919	773	38	3.16
NMW3856	POWNA1083-12	JN890771	Herbarium	Asparagales	Orchidaceae	Dactylorhiza	Dactylorhiza_purpurella	1952	rbcL	rbcLa-F	rbcLr590	566	32	39	71	495	4	10	491	485	59	12.54	0.81	2.02	99.19	97.98	575	9	42	51	524	4	11	520	513	58	8.87	0.76	2.1	99.24	97.9	546	1019	8	21	1011	998	59	0.79
NMW5041	POWNB004-10	JN891573	Fresh	Asparagales	Orchidaceae	Dactylorhiza	Dactylorhiza_purpurella	2010	rbcL	rbcLa-F	rbcLr590	564	28	8	36	528	4	7	524	521	59	6.38	0.76	1.33	99.24	98.67	567	13	32	45	522	4	5	518	517	60	7.94	0.77	0.96	99.23	99.04	573	1050	8	12	1042	1038	60	0.76
NBGW6050	POWNB169-10	JN893778	Fresh	Asparagales	Orchidaceae	Dactylorhiza	Dactylorhiza_purpurella	2010	rbcL	rbcLa-F	rbcLr590	569	30	11	41	528	4	7	524	521	59	7.21	0.76	1.33	99.24	98.67	569	14	28	42	527	4	12	523	515	58	7.38	0.76	2.28	99.24	97.72	570	1055	8	19	1047	1036	58	0.76
NMW256	POWNA853-10	JN891811	Herbarium	Asparagales	Orchidaceae	Dactylorhiza	Dactylorhiza_traunsteinerioides	1956	rbcL	rbcLa-F	rbcLr506	464	63	10	73	391	25	58	366	333	48	15.73	6.39	14.83	93.61	85.17	484	15	110	125	359	5	26	354	333	53	25.83	1.39	7.24	98.61	92.76	488	750	30	84	720	666	50	4
NMW3858	POWNA1093-12	JN890784	Herbarium	Asparagales	Orchidaceae	Dactylorhiza	Dactylorhiza_traunsteinerioides	1955	rbcL	rbcLa-F	rbcLr590	573	45	48	93	480	38	116	442	364	44	16.23	7.92	24.17	92.08	75.83	572	15	57	72	500	87	157	413	343	41	12.59	17.4	31.4	82.6	68.6	534	980	125	273	855	707	42	12.76
NMW5069	POWNB011-10	JN891058	Fresh	Asparagales	Orchidaceae	Epipactis	Epipactis_atrorubens	2010	rbcL	rbcLa-F	rbcLr590	567	32	8	40	527	4	6	523	521	60	7.05	0.76	1.14	99.24	98.86	569	9	35	44	525	4	7	521	518	59	7.73	0.76	1.33	99.24	98.67	577	1052	8	13	1044	1039	59	0.76
NMW5157	POWNB049-10	JN892049	Fresh	Asparagales	Orchidaceae	Epipactis	Epipactis_helleborine	2010	rbcL	rbcLa-F	rbcLr590	570	34	10	44	526	6	19	520	507	52	7.72	1.14	3.61	98.86	96.39	565	12	31	43	522	4	13	518	509	52	7.61	0.77	2.49	99.23	97.51	574	1048	10	32	1038	1016	52	0.95
NMW6319	POWNA2623-12	JN893018	Fresh	Asparagales	Orchidaceae	Epipactis	Epipactis_helleborine	2011	rbcL	rbcLa-F	rbcLr590	565	28	5	33	532	4	8	528	524	59	5.84	0.75	1.5	99.25	98.5	569	12	27	39	530	4	11	526	519	59	6.85	0.75	2.08	99.25	97.92	578	1062	8	19	1054	1043	59	0.75
NMW5159	POWNB050-10	JN892050	Fresh	Asparagales	Orchidaceae	Epipactis	Epipactis_leptochila	2010	rbcL	rbcLa-F	rbcLr590	566	28	10	38	528	4	8	524	520	58	6.71	0.76	1.52	99.24	98.48	563	13	29	42	521	4	12	517	509	57	7.46	0.77	2.3	99.23	97.7	571	1049	8	20	1041	1029	57	0.76
NBGW6044	POWNB165-10	JN893553	Fresh	Asparagales	Orchidaceae	Epipactis	Epipactis_palustris	2010	rbcL	rbcLa-F	rbcLr590	565	25	16	41	524	4	10	520	514	58	7.26	0.76	1.91	99.24	98.09	571	14	33	47	524	4	9	520	515	59	8.23	0.76	1.72	99.24	98.28	569	1048	8	19	1040	1029	58	0.76
NMW5301	POWNB126-10	JN893642	Fresh	Asparagales	Orchidaceae	Epipactis	Epipactis_palustris	2010	rbcL	rbcLa-F	rbcLr590	564	26	9	35	529	4	10	525	519	59	6.21	0.76	1.89	99.24	98.11	568	8	29	37	531	4	12	527	519	59	6.51	0.75	2.26	99.25	97.74	577	1060	8	22	1052	1038	59	0.75
NMW300	POWNA856-10	JN892232	Herbarium	Asparagales	Orchidaceae	Epipactis	Epipactis_phyllanthes	1972	rbcL	rbcLa-F	rbcLr506	469	74	9	83	386	13	15	373	371	57	17.7	3.37	3.89	96.63	96.11	481	10	82	92	389	13	19	376	370	54	19.13	3.34	4.88	96.66	95.12	491	775	26	34	749	741	55	3.35
NMW3873	POWNA1414-12	JN891262	Herbarium	Asparagales	Orchidaceae	Epipactis	Epipactis_phyllanthes	1963	rbcL	rbcLa-F	rbcLr590	567	28	12	40	527	4	7	523	520	59	7.05	0.76	1.33	99.24	98.67	574	12	38	50	524	4	11	520	513	59	8.71	0.76	2.1	99.24	97.9	572	1051	8	18	1043	1033	59	0.76
NMW6353	POWNA1000-12	JN890669	Fresh	Asparagales	Orchidaceae	Gymnadenia	Gymnadenia_conopsea	2011	rbcL	rbcLa-F	rbcLr590	562	22	12	34	528	4	9	524	519	58	6.05	0.76	1.7	99.24	98.3	566	15	24	39	527	4	7	523	520	59	6.89	0.76	1.33	99.24	98.67	569	1055	8	16	1047	1039	59	0.76
NMW6347	POWNA1155-12	JN890895	Fresh	Asparagales	Orchidaceae	Gymnadenia	Gymnadenia_conopsea	2011	rbcL	rbcLa-F	rbcLr590	565	30	6	36	529	4	7	525	522	59	6.37	0.76	1.32	99.24	98.68	566	10	28	38	528	4	8	524	520	59	6.71	0.76	1.52	99.24	98.48	577	1057	8	15	1049	1042	59	0.76
NMW408	POWNA862-10	JN892965	Herbarium	Asparagales	Orchidaceae	Hammarbya	Hammarbya_paludosa	1953	rbcL	rbcLa-F	rbcLr506	480	77	11	88	392	4	9	388	383	57	18.33	1.02	2.3	98.98	97.7	464	2	43	45	419	12	25	407	394	54	9.7	2.86	5.97	97.14	94.03	490	811	16	34	795	777	55	1.97
NMW3877	POWNA1415-12	JN891265	Herbarium	Asparagales	Orchidaceae	Hammarbya	Hammarbya_paludosa	1998	rbcL	rbcLa-F	rbcLr590	564	29	8	37	527	4	6	523	521	59	6.56	0.76	1.14	99.24	98.86	567	10	32	42	525	4	7	521	518	60	7.41	0.76	1.33	99.24	98.67	575	1052	8	13	1044	1039	59	0.76
NMW3879	POWNA1417-12	JN891267	Herbarium	Asparagales	Orchidaceae	Herminium	Herminium_monorchis	1957	rbcL	rbcLa-F	rbcLr590	570	40	1	41	529	4	9	525	520	59	7.19	0.76	1.7	99.24	98.3	566	9	59	68	498	4	4	494	494	59	12.01	0.8	0.8	99.2	99.2	582	1027	8	13	1019	1014	59	0.78
NMW503	POWNA429-10	JN892710	Herbarium	Asparagales	Orchidaceae	Liparis	Liparis_loeselii	1984	rbcL	rbcLa-F	rbcLr590	619	35	72	107	512	7	51	505	461	42	17.29	1.37	9.96	98.63	90.04	623	73	34	107	516	4	29	512	487	50	17.17	0.78	5.62	99.22	94.38	569	1028	11	80	1017	948	46	1.07
NMW3883	POWNA2104-12	JN893838	Herbarium	Asparagales	Orchidaceae	Liparis	Liparis_loeselii	1985	rbcL	rbcLa-F	rbcLr590	565	24	13	37	528	7	31	521	497	50	6.55	1.33	5.87	98.67	94.13	571	7	62	69	502	13	46	489	456	51	12.08	2.59	9.16	97.41	90.84	577	1030	20	77	1010	953	51	1.94
NMW3882	POWNA2408-12	JN893837	Herbarium	Asparagales	Orchidaceae	Liparis	Liparis_loeselii	1958	rbcL	rbcLa-F	rbcLr590	576	42	7	49	527	4	7	523	520	60	8.51	0.76	1.33	99.24	98.67	574	6	33	39	535	9	18	526	517	58	6.79	1.68	3.36	98.32	96.64	586	1062	13	25	1049	1037	59	1.22
NMW5057	POWNB015-10	JN891315	Fresh	Asparagales	Orchidaceae	Neottia	Neottia_cordata	2010	rbcL	rbcLa-F	rbcLr590	566	31	10	41	525	4	6	521	519	60	7.24	0.76	1.14	99.24	98.86	566	14	25	39	527	4	8	523	519	59	6.89	0.76	1.52	99.24	98.48	571	1052	8	14	1044	1038	60	0.76
NMW3891	POWNA2585-12	JN893608	Herbarium	Asparagales	Orchidaceae	Neottia	Neottia_nidus-avis	1924	rbcL	rbcLa-F	rbcLajf634R	633	50	34	84	549	34	103	515	446	38	13.27	6.19	18.76	93.81	81.24	627	3	38	41	586	4	10	582	576	57	6.54	0.68	1.71	99.32	98.29	624	1135	38	113	1097	1022	47	3.35
NMW3887	POWNA2432-12	JN893841	Herbarium	Asparagales	Orchidaceae	Neottia	Neottia_ovata	1989	rbcL	rbcLa-F	rbcLr590	566	35	12	47	519	4	7	515	512	60	8.3	0.77	1.35	99.23	98.65	567	15	36	51	516	4	6	512	510	60	8.99	0.78	1.16	99.22	98.84	569	1035	8	13	1027	1022	60	0.77
NMW3888	POWNA3195-12	JN893842	Herbarium	Asparagales	Orchidaceae	Neottia	Neottia_ovata	1952	rbcL	rbcLa-F	rbcLr590	565	34	10	44	521	4	4	517	517	60	7.79	0.77	0.77	99.23	99.23	571	12	36	48	523	4	8	519	515	59	8.41	0.76	1.53	99.24	98.47	574	1044	8	12	1036	1032	60	0.77
NBGW6030	POWNB156-10	JN893312	Fresh	Asparagales	Orchidaceae	Neottia	Neottia_ovata	2010	rbcL	rbcLa-F	rbcLr590	566	28	13	41	525	4	6	521	519	59	7.24	0.76	1.14	99.24	98.86	568	12	28	40	528	4	8	524	520	59	7.04	0.76	1.52	99.24	98.48	571	1053	8	14	1045	1039	59	0.76
NBGW6061	POWNB170-10	JN890698	Fresh	Asparagales	Orchidaceae	Ophrys	Ophrys_apifera	2010	rbcL	rbcLa-F	rbcLr590	565	27	13	40	525	4	12	521	513	55	7.08	0.76	2.29	99.24	97.71	569	16	29	45	524	4	7	520	517	59	7.91	0.76	1.34	99.24	98.66	568	1049	8	19	1041	1030	57	0.76
NMW6053	POWNA1847-12	JN891943	Fresh	Asparagales	Orchidaceae	Ophrys	Ophrys_insectifera	2011	rbcL	rbcLa-F	rbcLr590	568	31	3	34	534	4	8	530	526	58	5.99	0.75	1.5	99.25	98.5	570	11	28	39	531	7	24	524	507	48	6.84	1.32	4.52	98.68	95.48	582	1065	11	32	1054	1033	53	1.03
NMW6052	POWNA1846-12	JN891942	Fresh	Asparagales	Orchidaceae	Ophrys	Ophrys_insectifera	2011	rbcL	rbcLa-F	rbcLr590	567	31	8	39	528	4	6	524	522	58	6.88	0.76	1.14	99.24	98.86	564	13	25	38	526	4	6	522	520	60	6.74	0.76	1.14	99.24	98.86	573	1054	8	12	1046	1042	59	0.76
NBGW6023	POWNB150-10	JN892565	Fresh	Asparagales	Orchidaceae	Orchis	Orchis_mascula	2010	rbcL	rbcLa-F	rbcLr590	566	27	11	38	528	4	10	524	518	59	6.71	0.76	1.89	99.24	98.11	567	14	32	46	521	4	5	517	516	59	8.11	0.77	0.96	99.23	99.04	572	1049	8	15	1041	1034	59	0.76
NMW6331	POWNA2964-12	JN893527	Fresh	Asparagales	Orchidaceae	Orchis	Orchis_mascula	2011	rbcL	rbcLa-F	rbcLr590	565	28	8	36	529	4	6	525	523	59	6.37	0.76	1.13	99.24	98.87	569	12	29	41	528	4	7	524	521	60	7.21	0.76	1.33	99.24	98.67	575	1057	8	13	1049	1044	59	0.76
NBGW2026	POWNA541-10	JN893307	Fresh	Asparagales	Orchidaceae	Platanthera	Platanthera_chlorantha	2008	rbcL	rbcLa-F	rbcLr590	647	79	98	177	470	11	17	459	453	53	27.36	2.34	3.62	97.66	96.38	597	56	26	82	515	8	21	507	494	55	13.74	1.55	4.08	98.45	95.92	569	985	19	38	966	947	54	1.93
NMW6490	POWNA1505-12	JN891411	Fresh	Asparagales	Orchidaceae	Platanthera	Platanthera_chlorantha	2011	rbcL	rbcLa-F	rbcLr590	571	35	4	39	532	4	9	528	523	56	6.83	0.75	1.69	99.25	98.31	569	8	31	39	530	4	7	526	523	60	6.85	0.75	1.32	99.25	98.68	582	1062	8	16	1054	1046	58	0.75
NMW5042	POWNB101-10	JN891570	Fresh	Asparagales	Orchidaceae	Platanthera	Platanthera_chlorantha	2010	rbcL	rbcLa-F	rbcLr590	566	28	13	41	525	5	10	520	515	59	7.24	0.95	1.9	99.05	98.1	564	10	20	30	534	4	14	530	520	59	5.32	0.75	2.62	99.25	97.38	573	1059	9	24	1050	1035	59	0.85
NMW3917	POWNA2229-12	JN892451	Herbarium	Asparagales	Orchidaceae	Pseudorchis	Pseudorchis_albida	1930	rbcL	rbcLa-F	rbcLr590	560	29	0	29	531	4	8	527	523	56	5.18	0.75	1.51	99.25	98.49	570	9	38	47	523	4	7	519	516	60	8.25	0.76	1.34	99.24	98.66	584	1054	8	15	1046	1039	58	0.76
NMW3921	POWNA1297-12	JN891782	Herbarium	Asparagales	Orchidaceae	Spiranthes	Spiranthes_spiralis	1993	rbcL	rbcLa-F	rbcLr590	564	29	11	40	524	5	18	519	506	49	7.09	0.95	3.44	99.05	96.56	567	19	31	50	517	6	23	511	494	47	8.82	1.16	4.45	98.84	95.55	566	1041	11	41	1030	1000	48	1.06
NMW2090	POWNA2698-12	JN892857	Herbarium	Asterales	Asteraceae	Achillea	Achillea_millefolium	1987	rbcL	rbcLa-F	rbcLr590	570	32	13	45	525	8	22	517	503	54	7.89	1.52	4.19	98.48	95.81	572	19	47	66	506	4	22	502	484	50	11.54	0.79	4.35	99.21	95.65	565	1031	12	44	1019	987	52	1.16
NMW6172	POWNA1036-12	JN890717	Fresh	Asterales	Asteraceae	Achillea	Achillea_millefolium	2011	rbcL	rbcLa-F	rbcLr590	563	27	3	30	533	4	7	529	526	59	5.33	0.75	1.31	99.25	98.69	567	10	29	39	528	4	7	524	521	60	6.88	0.76	1.33	99.24	98.67	577	1061	8	14	1053	1047	59	0.75
NMW2091	POWNA2699-12	JN892863	Herbarium	Asterales	Asteraceae	Achillea	Achillea_millefolium	1990	rbcL	rbcLa-F	rbcLr590	563	24	16	40	523	4	8	519	515	60	7.1	0.76	1.53	99.24	98.47	568	11	27	38	530	4	9	526	521	59	6.69	0.75	1.7	99.25	98.3	567	1053	8	17	1045	1036	59	0.76
NBGW2041	POWNA002-10	JN892238	Herbarium	Asterales	Asteraceae	Achillea	Achillea_millefolium	2008	rbcL	rbcLa-F	rbcLr590	544	22	4	26	518	9	14	509	504	57	4.78	1.74	2.7	98.26	97.3	561	15	18	33	528	9	19	519	509	57	5.88	1.7	3.6	98.3	96.4	566	1046	18	33	1028	1013	57	1.72
NMW2093	POWNA2700-12	JN892871	Herbarium	Asterales	Asteraceae	Achillea	Achillea_ptarmica	1994	rbcL	rbcLa-F	rbcLr590	566	27	12	39	527	4	7	523	520	58	6.89	0.76	1.33	99.24	98.67	573	268	37	305	268	14	61	254	207	38	53.23	5.22	22.76	94.78	77.24	527	795	18	68	777	727	52	2.26
NMW003	POWNA003-10	JN891887	Herbarium	Asterales	Asteraceae	Achillea	Achillea_ptarmica	2002	rbcL	rbcLa-F	rbcLr590	751	24	203	227	524	9	22	515	502	50	30.23	1.72	4.2	98.28	95.8	916	367	81	448	468	34	60	434	408	51	48.91	7.26	12.82	92.74	87.18	565	992	43	82	949	910	50	4.33
NMW2092	POWNA2919-12	JN893432	Herbarium	Asterales	Asteraceae	Achillea	Achillea_ptarmica	1999	rbcL	rbcLa-F	rbcLr590	565	26	17	43	522	4	6	518	516	59	7.61	0.77	1.15	99.23	98.85	569	14	27	41	528	4	10	524	518	59	7.21	0.76	1.89	99.24	98.11	564	1050	8	16	1042	1034	59	0.76
NMW2095	POWNA2933-12	JN893464	Herbarium	Asterales	Asteraceae	Antennaria	Antennaria_dioica	1937	rbcL	rbcLa-F	rbcLr590	574	39	8	47	527	4	4	523	523	60	8.19	0.76	0.76	99.24	99.24	570	110	216	326	244	40	100	204	144	31	57.19	16.39	40.98	83.61	59.02	527	771	44	104	727	667	50	5.71
NMW1002	POWNA037-10	JN891313	Herbarium	Asterales	Asteraceae	Antennaria	Antennaria_dioica	2002	rbcL	rbcLa-F	rbcLr590	796	28	247	275	521	4	13	517	508	51	34.55	0.77	2.5	99.23	97.5	564	25	21	46	518	4	11	514	507	57	8.16	0.77	2.12	99.23	97.88	559	1039	8	24	1031	1015	54	0.77
NMW2097	POWNA2947-12	JN893478	Herbarium	Asterales	Asteraceae	Anthemis	Anthemis_arvensis	1961	rbcL	rbcLa-F	rbcLr590	572	33	7	40	532	6	30	526	502	50	6.99	1.13	5.64	98.87	94.36	570	12	35	47	523	4	8	519	515	59	8.25	0.76	1.53	99.24	98.47	577	1055	10	38	1045	1017	55	0.95
NMW2099	POWNA2702-12	JN893133	Herbarium	Asterales	Asteraceae	Anthemis	Anthemis_cotula	1991	rbcL	rbcLa-F	rbcLr590	564	27	17	44	520	4	4	516	516	60	7.8	0.77	0.77	99.23	99.23	567	12	30	42	525	4	7	521	518	60	7.41	0.76	1.33	99.24	98.67	565	1045	8	11	1037	1034	60	0.77
NMW056	POWNA836-10	JN892410	Herbarium	Asterales	Asteraceae	Arctium	Arctium_lappa	1992	rbcL	rbcLa-F	rbcLr506	472	20	13	33	439	12	16	427	423	56	6.99	2.73	3.64	97.27	96.36	480	14	29	43	437	8	16	429	421	54	8.96	1.83	3.66	98.17	96.34	485	876	20	32	856	844	55	2.28
NMW2101	POWNA1956-12	JN892090	Herbarium	Asterales	Asteraceae	Arctium	Arctium_lappa	1999	rbcL	rbcLa-F	rbcLr590	563	25	13	38	525	4	7	521	518	60	6.75	0.76	1.33	99.24	98.67	570	15	32	47	523	4	5	519	518	60	8.25	0.76	0.96	99.24	99.04	570	1048	8	12	1040	1036	60	0.76
NMW057	POWNA050-10	JN892409	Herbarium	Asterales	Asteraceae	Arctium	Arctium_minus	1988	rbcL	rbcLa-F	rbcLr590	567	33	17	50	517	4	12	513	505	52	8.82	0.77	2.32	99.23	97.68	677	131	31	162	515	4	11	511	504	55	23.93	0.78	2.14	99.22	97.86	564	1032	8	23	1024	1009	54	0.78
NMW2103	POWNA1950-12	JN891934	Herbarium	Asterales	Asteraceae	Arctium	Arctium_minus	1973	rbcL	rbcLa-F	rbcLr590	563	26	17	43	520	4	6	516	514	60	7.64	0.77	1.15	99.23	98.85	567	12	25	37	530	4	5	526	525	59	6.53	0.75	0.94	99.25	99.06	567	1050	8	11	1042	1039	60	0.76
NMW063	POWNA054-10	JN891748	Herbarium	Asterales	Asteraceae	Artemisia	Artemisia_absinthium	1958	rbcL	rbcLa-F	rbcLr590	656	35	105	140	516	4	11	512	505	51	21.34	0.78	2.13	99.22	97.87	683	128	43	171	512	4	21	508	491	53	25.04	0.78	4.1	99.22	95.9	572	1028	8	32	1020	996	52	0.78
NMW2105	POWNA1101-12	JN890797	Herbarium	Asterales	Asteraceae	Artemisia	Artemisia_absinthium	1986	rbcL	rbcLa-F	rbcLr590	569	32	3	35	534	4	11	530	523	57	6.15	0.75	2.06	99.25	97.94	572	26	68	94	478	38	70	440	408	45	16.43	7.95	14.64	92.05	85.36	565	1012	42	81	970	931	51	4.15
NMW2104	POWNA1958-12	JN892095	Herbarium	Asterales	Asteraceae	Artemisia	Artemisia_absinthium	1980	rbcL	rbcLa-F	rbcLr590	565	25	16	41	524	4	8	520	516	59	7.26	0.76	1.53	99.24	98.47	569	10	26	36	533	4	8	529	525	59	6.33	0.75	1.5	99.25	98.5	571	1057	8	16	1049	1041	59	0.76
NMW2108	POWNA1104-12	JN890800	Herbarium	Asterales	Asteraceae	Artemisia	Artemisia_campestris	1953	rbcL	rbcLa-F	rbcLr590	568	84	6	90	478	4	6	474	472	60	15.85	0.84	1.26	99.16	98.74	567	17	38	55	512	10	23	502	489	58	9.7	1.95	4.49	98.05	95.51	568	990	14	29	976	961	59	1.41
NMW838	POWNA881-10	JN892340	Herbarium	Asterales	Asteraceae	Artemisia	Artemisia_maritima	1991	rbcL	rbcLa-F	rbcLr506	471	92	12	104	367	12	14	355	353	56	22.08	3.27	3.81	96.73	96.19	482	12	98	110	372	9	16	363	356	56	22.82	2.42	4.3	97.58	95.7	486	739	21	30	718	709	56	2.84
NMW2110	POWNA999-12	JN892237	Herbarium	Asterales	Asteraceae	Artemisia	Artemisia_vulgaris	1980	rbcL	rbcLa-F	rbcLr590	572	38	2	40	532	4	11	528	521	58	6.99	0.75	2.07	99.25	97.93	569	0	56	56	513	3	7	510	506	59	9.84	0.58	1.36	99.42	98.64	589	1045	7	18	1038	1027	59	0.67
NMW2109	POWNA1105-12	JN890801	Herbarium	Asterales	Asteraceae	Artemisia	Artemisia_vulgaris	1962	rbcL	rbcLa-F	rbcLr590	562	25	22	47	515	7	40	508	475	49	8.36	1.36	7.77	98.64	92.23	571	4	45	49	522	13	36	509	486	47	8.58	2.49	6.9	97.51	93.1	568	1037	20	76	1017	961	48	1.93
NMW064	POWNA055-10	JN891751	Herbarium	Asterales	Asteraceae	Artemisia	Artemisia_vulgaris	1987	rbcL	rbcLa-F	rbcLr590	552	23	5	28	524	4	13	520	511	50	5.07	0.76	2.48	99.24	97.52	563	13	32	45	518	4	24	514	494	50	7.99	0.77	4.63	99.23	95.37	570	1042	8	37	1034	1005	50	0.77
NMW2113	POWNA1005-12	JN890674	herbarium	Asterales	Asteraceae	Aster	Aster tripolium	1985	rbcL	rbcLa-F	rbcLa-rev
NMW2112	POWNA954-12	JN890572	Herbarium	Asterales	Asteraceae	Aster	Aster_linosyris	1918	rbcL	rbcLa-F	rbcLr590	567	39	23	62	505	13	52	492	453	41	10.93	2.57	10.3	97.43	89.7	571	26	74	100	471	4	7	467	464	55	17.51	0.85	1.49	99.15	98.51	547	976	17	59	959	917	48	1.74
NMW2111	POWNA998-12	JN890667	Herbarium	Asterales	Asteraceae	Aster	Aster_linosyris	1966	rbcL	rbcLa-F	rbcLr590	574	39	1	40	534	4	10	530	524	57	6.97	0.75	1.87	99.25	98.13	577	23	39	62	515	4	9	511	506	59	10.75	0.78	1.75	99.22	98.25	571	1049	8	19	1041	1030	58	0.76
NBGW3057	POWNA060-10	JN892320	Fresh	Asterales	Asteraceae	Aster	Aster_linosyris	2008	rbcL	rbcLa-F	rbcLr590	564	118	18	136	428	15	39	413	389	54	24.11	3.5	9.11	96.5	90.89	562	17	19	36	526	10	17	516	509	57	6.41	1.9	3.23	98.1	96.77	564	954	25	56	929	898	56	2.62
NMW070	POWNA061-10	JN891980	Herbarium	Asterales	Asteraceae	Aster	Aster_tripolium	1999	rbcL	rbcLa-F	rbcLr590	566	29	15	44	522	11	31	511	491	49	7.77	2.11	5.94	97.89	94.06	686	131	28	159	527	14	37	513	490	53	23.18	2.66	7.02	97.34	92.98	573	1049	25	68	1024	981	51	2.38
NMW2115	POWNA948-12	JN890566	Herbarium	Asterales	Asteraceae	Bellis	Bellis_perennis	1970	rbcL	rbcLa-F	rbcLr590	568	30	10	40	528	13	46	515	482	46	7.04	2.46	8.71	97.54	91.29	570	15	34	49	521	4	5	517	516	60	8.6	0.77	0.96	99.23	99.04	571	1049	17	51	1032	998	53	1.62
NMW6137	POWNA2650-12	JN892714	Fresh	Asterales	Asteraceae	Bellis	Bellis_perennis	2011	rbcL	rbcLa-F	rbcLr590	562	26	7	33	529	4	7	525	522	59	5.87	0.76	1.32	99.24	98.68	569	15	32	47	522	4	7	518	515	60	8.26	0.77	1.34	99.23	98.66	572	1051	8	14	1043	1037	59	0.76
NBGW2004	POWNA069-10	JN892812	Herbarium	Asterales	Asteraceae	Bellis	Bellis_perennis	2008	rbcL	rbcLa-F	rbcLr590	566	45	18	63	503	18	25	485	478	57	11.13	3.58	4.97	96.42	95.03	564	15	25	40	524	7	14	517	510	58	7.09	1.34	2.67	98.66	97.33	571	1027	25	39	1002	988	57	2.43
NMW2116	POWNA2066-12	JN890661	Herbarium	Asterales	Asteraceae	Bellis	Bellis_perennis	1993	rbcL	rbcLa-F	rbcLr590	574	32	5	37	537	4	9	533	528	60	6.45	0.74	1.68	99.26	98.32	572	0	38	38	534	3	6	531	528	58	6.64	0.56	1.12	99.44	98.88	591	1071	7	15	1064	1056	59	0.65
NBGW7210	POWNA1166-12	JN890907	Fresh	Asterales	Asteraceae	Bellis	Bellis_perennis	2011	rbcL	rbcLa-F	rbcLr590	564	26	8	34	530	4	8	526	522	59	6.03	0.75	1.51	99.25	98.49	570	4	30	34	536	4	10	532	526	59	5.96	0.75	1.87	99.25	98.13	582	1066	8	18	1058	1048	59	0.75
NMW087	POWNA074-10	JN892712	Herbarium	Asterales	Asteraceae	Bidens	Bidens_cernua	1997	rbcL	rbcLa-F	rbcLr590	561	25	15	40	521	7	28	514	493	49	7.13	1.34	5.37	98.66	94.63	683	135	48	183	500	4	8	496	492	54	26.79	0.8	1.6	99.2	98.4	568	1021	11	36	1010	985	51	1.08
NMW2117	POWNA2053-12	JN892208	Herbarium	Asterales	Asteraceae	Bidens	Bidens_cernua	1993	rbcL	rbcLa-F	rbcLr590	566	29	11	40	526	8	27	518	499	50	7.07	1.52	5.13	98.48	94.87	571	12	31	43	528	4	8	524	520	59	7.53	0.76	1.52	99.24	98.48	573	1054	12	35	1042	1019	55	1.14
NMW2118	POWNA958-12	JN890577	Herbarium	Asterales	Asteraceae	Bidens	Bidens_cernua	1990	rbcL	rbcLa-F	rbcLr590	568	31	5	36	532	4	8	528	524	60	6.34	0.75	1.5	99.25	98.5	568	0	27	27	541	3	9	538	532	59	4.75	0.55	1.66	99.45	98.34	587	1073	7	17	1066	1056	60	0.65
NMW088	POWNA890-10	JN893066	Herbarium	Asterales	Asteraceae	Bidens	Bidens_tripartita	2003	rbcL	rbcLa-F	rbcLr590	554	25	3	28	526	4	7	522	519	59	5.05	0.76	1.33	99.24	98.67	571	9	37	46	525	4	12	521	513	59	8.06	0.76	2.29	99.24	97.71	572	1051	8	19	1043	1032	59	0.76
NMW2119	POWNA957-12	JN890576	Herbarium	Asterales	Asteraceae	Bidens	Bidens_tripartita	1993	rbcL	rbcLa-F	rbcLr590	565	29	10	39	526	17	72	509	454	43	6.9	3.23	13.69	96.77	86.31	570	13	31	44	526	4	8	522	518	60	7.72	0.76	1.52	99.24	98.48	571	1052	21	80	1031	972	51	2
NMW2120	POWNA3021-12	JN891148	Herbarium	Asterales	Asteraceae	Bidens	Bidens_tripartita	1997	rbcL	rbcLa-F	rbcLr590	567	29	11	40	527	7	20	520	507	51	7.05	1.33	3.8	98.67	96.2	570	11	28	39	531	4	11	527	520	59	6.84	0.75	2.07	99.25	97.93	574	1058	11	31	1047	1027	55	1.04
NMW2121	POWNA3022-12	JN891149	Herbarium	Asterales	Asteraceae	Bidens	Bidens_tripartita	1984	rbcL	rbcLa-F	rbcLr590	564	26	9	35	529	4	12	525	517	58	6.21	0.76	2.27	99.24	97.73	566	10	24	34	532	4	12	528	520	59	6.01	0.75	2.26	99.25	97.74	576	1061	8	24	1053	1037	58	0.75
NMW131	POWNA893-10	JN890822	Herbarium	Asterales	Asteraceae	Carduus	Carduus_crispus	1990	rbcL	rbcLa-F	rbcLr590	980	16	431	447	533	67	131	466	402	46	45.61	12.57	24.58	87.43	75.42	823	267	27	294	529	4	10	525	519	59	35.72	0.76	1.89	99.24	98.11	569	1062	71	141	991	921	53	6.69
NMW2123	POWNA3023-12	JN893592	Herbarium	Asterales	Asteraceae	Carduus	Carduus_crispus	1979	rbcL	rbcLa-F	rbcLr590	567	27	12	39	528	4	10	524	518	55	6.88	0.76	1.89	99.24	98.11	565	11	27	38	527	4	9	523	518	59	6.73	0.76	1.71	99.24	98.29	575	1055	8	19	1047	1036	57	0.76
NMW2124	POWNA3024-12	JN893593	Herbarium	Asterales	Asteraceae	Carduus	Carduus_crispus	1972	rbcL	rbcLa-F	rbcLr590	567	29	10	39	528	5	14	523	514	54	6.88	0.95	2.65	99.05	97.35	569	9	28	37	532	4	9	528	523	59	6.5	0.75	1.69	99.25	98.31	577	1060	9	23	1051	1037	57	0.85
NMW5263	POWNB132-10	JN890614	Fresh	Asterales	Asteraceae	Carduus	Carduus_nutans	2010	rbcL	rbcLa-F	rbcLr590	570	34	13	47	523	4	10	519	513	56	8.25	0.76	1.91	99.24	98.09	570	16	31	47	523	4	11	519	512	59	8.25	0.76	2.1	99.24	97.9	570	1046	8	21	1038	1025	57	0.76
NMW2125	POWNA3025-12	JN893594	Herbarium	Asterales	Asteraceae	Carduus	Carduus_nutans	1986	rbcL	rbcLa-F	rbcLr590	573	35	12	47	526	5	12	521	514	54	8.2	0.95	2.28	99.05	97.72	568	11	34	45	523	4	7	519	516	60	7.92	0.76	1.34	99.24	98.66	573	1049	9	19	1040	1030	57	0.86
NMW2126	POWNA3026-12	JN893595	Herbarium	Asterales	Asteraceae	Carduus	Carduus_nutans	1991	rbcL	rbcLa-F	rbcLr590	566	27	14	41	525	5	12	520	513	55	7.24	0.95	2.29	99.05	97.71	571	12	31	43	528	4	11	524	517	59	7.53	0.76	2.08	99.24	97.92	569	1053	9	23	1044	1030	57	0.85
NMW132	POWNA104-10	JN891235	Herbarium	Asterales	Asteraceae	Carduus	Carduus_nutans	1987	rbcL	rbcLa-F	rbcLr590	577	45	18	63	514	54	117	460	397	42	10.92	10.51	22.76	89.49	77.24	562	17	24	41	521	15	46	506	475	50	7.3	2.88	8.83	97.12	91.17	576	1035	69	163	966	872	46	6.67
NMW2129	POWNA3014-12	JN891073	Herbarium	Asterales	Asteraceae	Carduus	Carduus_tenuiflorus	2006	rbcL	rbcLa-F	rbcLr590	568	31	8	39	529	4	5	525	524	60	6.87	0.76	0.95	99.24	99.05	577	41	53	94	483	19	44	464	439	46	16.29	3.93	9.11	96.07	90.89	544	1012	23	49	989	963	53	2.27
NMW133	POWNA105-10	JN891236	Herbarium	Asterales	Asteraceae	Carduus	Carduus_tenuiflorus	1987	rbcL	rbcLa-F	rbcLr590	574	43	18	61	513	13	55	500	458	45	10.63	2.53	10.72	97.47	89.28	572	18	40	58	514	7	32	507	482	53	10.14	1.36	6.23	98.64	93.77	565	1027	20	87	1007	940	49	1.95
NMW2128	POWNA3013-12	JN892301	Herbarium	Asterales	Asteraceae	Carduus	Carduus_tenuiflorus	1991	rbcL	rbcLa-F	rbcLr590	568	29	12	41	527	9	22	518	505	51	7.22	1.71	4.17	98.29	95.83	567	13	25	38	529	4	10	525	519	59	6.7	0.76	1.89	99.24	98.11	571	1056	13	32	1043	1024	55	1.23
NMW2131	POWNA2882-12	JN890912	Herbarium	Asterales	Asteraceae	Carlina	Carlina_vulgaris	1982	rbcL	rbcLa-F	rbcLr590	569	30	13	43	526	6	24	520	502	51	7.56	1.14	4.56	98.86	95.44	567	12	29	41	526	4	6	522	520	59	7.23	0.76	1.14	99.24	98.86	572	1052	10	30	1042	1022	55	0.95
NMW2130	POWNA1169-12	JN892332	Herbarium	Asterales	Asteraceae	Carlina	Carlina_vulgaris	1968	rbcL	rbcLa-F	rbcLr590	571	29	6	35	536	4	8	532	528	60	6.13	0.75	1.49	99.25	98.51	566	9	29	38	528	4	8	524	520	60	6.71	0.76	1.52	99.24	98.48	579	1064	8	16	1056	1048	60	0.75
NMW2133	POWNA2880-12	JN890909	Herbarium	Asterales	Asteraceae	Centaurea	Centaurea_cyanus	1960	rbcL	rbcLa-F	rbcLr590	569	32	15	47	522	7	19	515	503	53	8.26	1.34	3.64	98.66	96.36	570	14	30	44	526	4	6	522	520	60	7.72	0.76	1.14	99.24	98.86	568	1048	11	25	1037	1023	56	1.05
NMW182	POWNA153-10	JN892802	Herbarium	Asterales	Asteraceae	Centaurea	Centaurea_cyanus	1992	rbcL	rbcLa-F	rbcLr590	563	27	17	44	519	6	36	513	483	47	7.82	1.16	6.94	98.84	93.06	565	20	21	41	524	5	27	519	497	53	7.26	0.95	5.15	99.05	94.85	563	1043	11	63	1032	980	50	1.05
NMW2132	POWNA2881-12	JN891415	Herbarium	Asterales	Asteraceae	Centaurea	Centaurea_cyanus	1990	rbcL	rbcLa-F	rbcLr590	565	29	2	31	534	4	6	530	528	60	5.49	0.75	1.12	99.25	98.88	564	3	21	24	540	4	11	536	529	59	4.26	0.74	2.04	99.26	97.96	586	1074	8	17	1066	1057	60	0.74
NMW183	POWNA154-10	JN891108	Herbarium	Asterales	Asteraceae	Centaurea	Centaurea_nigra	1992	rbcL	rbcLa-F	rbcLr590	565	28	19	47	518	12	41	506	477	47	8.32	2.32	7.92	97.68	92.08	567	20	26	46	521	13	31	508	490	52	8.11	2.5	5.95	97.5	94.05	564	1039	25	72	1014	967	50	2.41
NBGW7292	POWNA2147-12	JN892357	Fresh	Asterales	Asteraceae	Centaurea	Centaurea_nigra	2011	rbcL	rbcLa-F	rbcLr590	563	27	9	36	527	4	5	523	522	59	6.39	0.76	0.95	99.24	99.05	567	14	26	40	527	4	6	523	521	60	7.05	0.76	1.14	99.24	98.86	571	1054	8	11	1046	1043	59	0.76
NMW2134	POWNA2887-12	JN890917	Herbarium	Asterales	Asteraceae	Centaurea	Centaurea_nigra	1978	rbcL	rbcLa-F	rbcLr590	639	26	85	111	528	4	5	524	523	57	17.37	0.76	0.95	99.24	99.05	566	14	24	38	528	4	9	524	519	60	6.71	0.76	1.7	99.24	98.3	573	1056	8	14	1048	1042	58	0.76
NMW2135	POWNA2886-12	JN893384	Herbarium	Asterales	Asteraceae	Centaurea	Centaurea_nigra	1978	rbcL	rbcLa-F	rbcLr590	564	26	14	40	524	4	7	520	517	60	7.09	0.76	1.34	99.24	98.66	566	12	25	37	529	4	8	525	521	59	6.54	0.76	1.51	99.24	98.49	569	1053	8	15	1045	1038	60	0.76
NMW6189	POWNA2139-12	JN892339	Fresh	Asterales	Asteraceae	Centaurea	Centaurea_nigra	2011	rbcL	rbcLa-F	rbcLr590	566	29	9	38	528	4	5	524	523	59	6.71	0.76	0.95	99.24	99.05	563	10	19	29	534	4	9	530	525	59	5.15	0.75	1.69	99.25	98.31	573	1062	8	14	1054	1048	59	0.75
NMW184	POWNA155-10	JN892743	Herbarium	Asterales	Asteraceae	Centaurea	Centaurea_scabiosa	1980	rbcL	rbcLa-F	rbcLr590	687	29	123	152	535	50	113	485	422	43	22.13	9.35	21.12	90.65	78.88	950	399	31	430	520	6	21	514	499	54	45.26	1.15	4.04	98.85	95.96	578	1055	56	134	999	921	48	5.31
NMW2137	POWNA1170-12	JN892734	Herbarium	Asterales	Asteraceae	Centaurea	Centaurea_scabiosa	1988	rbcL	rbcLa-F	rbcLr590	566	23	16	39	527	4	9	523	518	59	6.89	0.76	1.71	99.24	98.29	567	13	27	40	527	4	7	523	520	60	7.05	0.76	1.33	99.24	98.67	566	1054	8	16	1046	1038	60	0.76
NMW2136	POWNA1171-12	JN892114	Herbarium	Asterales	Asteraceae	Centaurea	Centaurea_scabiosa	1997	rbcL	rbcLa-F	rbcLr590	576	36	7	43	533	5	11	528	522	58	7.47	0.94	2.06	99.06	97.94	565	6	26	32	533	4	8	529	525	60	5.66	0.75	1.5	99.25	98.5	581	1066	9	19	1057	1047	59	0.84
NMW2139	POWNA1159-12	JN891346	Herbarium	Asterales	Asteraceae	Chamaemelum	Chamaemelum_nobile	1968	rbcL	rbcLa-F	rbcLr590	574	116	34	150	424	31	101	393	323	38	26.13	7.31	23.82	92.69	76.18	573	115	65	180	393	36	86	357	307	38	31.41	9.16	21.88	90.84	78.12	447	817	67	187	750	630	38	8.2
NMW5037	POWNB002-10	JN892967	Fresh	Asterales	Asteraceae	Chamaemelum	Chamaemelum_nobile	2010	rbcL	rbcLa-F	rbcLr590	565	26	13	39	526	5	12	521	514	56	6.9	0.95	2.28	99.05	97.72	565	13	31	44	521	4	13	517	508	57	7.79	0.77	2.5	99.23	97.5	568	1047	9	25	1038	1022	56	0.86
NMW2138	POWNA1160-12	JN891348	Herbarium	Asterales	Asteraceae	Chamaemelum	Chamaemelum_nobile	1978	rbcL	rbcLa-F	rbcLr590	569	31	9	40	529	7	25	522	504	51	7.03	1.32	4.73	98.68	95.27	568	14	29	43	525	4	8	521	517	59	7.57	0.76	1.52	99.24	98.48	574	1054	11	33	1043	1021	55	1.04
NMW214	POWNA178-10	JN893534	Herbarium	Asterales	Asteraceae	Chrysanthemum	Chrysanthemum_segetum	1985	rbcL	rbcLa-F	rbcLr590	618	22	174	196	422	12	63	410	359	42	31.72	2.84	14.93	97.16	85.07	683	152	196	348	335	61	145	274	190	30	50.95	18.21	43.28	81.79	56.72	442	757	73	208	684	549	36	9.64
NMW2142	POWNA3050-12	JN893634	Herbarium	Asterales	Asteraceae	Chrysanthemum	Chrysanthemum_segetum	1987	rbcL	rbcLa-F	rbcLr590	565	28	14	42	523	15	48	508	475	48	7.43	2.87	9.18	97.13	90.82	568	12	33	45	523	4	6	519	517	60	7.92	0.76	1.15	99.24	98.85	569	1046	19	54	1027	992	54	1.82
NMW2141	POWNA2684-12	JN891237	Herbarium	Asterales	Asteraceae	Chrysanthemum	Chrysanthemum_segetum	1981	rbcL	rbcLa-F	rbcLr590	570	31	15	46	524	5	22	519	502	53	8.07	0.95	4.2	99.05	95.8	568	11	29	40	528	4	10	524	518	59	7.04	0.76	1.89	99.24	98.11	570	1052	9	32	1043	1020	56	0.86
NMW5265	POWNB130-10	JN890618	Fresh	Asterales	Asteraceae	Chrysanthemum	Chrysanthemum_segetum	2010	rbcL	rbcLa-F	rbcLr590	570	32	12	44	526	4	5	522	521	59	7.72	0.76	0.95	99.24	99.05	568	10	29	39	529	4	11	525	518	59	6.87	0.76	2.08	99.24	97.92	575	1055	8	16	1047	1039	59	0.76
NMW217	POWNA181-10	JN892684	Herbarium	Asterales	Asteraceae	Cichorium	Cichorium_intybus	1996	rbcL	rbcLa-F	rbcLr590	801	28	248	276	525	4	14	521	511	53	34.46	0.76	2.67	99.24	97.33	683	129	28	157	526	4	14	522	512	55	22.99	0.76	2.66	99.24	97.34	575	1051	8	28	1043	1023	54	0.76
NMW2144	POWNA2679-12	JN892797	Herbarium	Asterales	Asteraceae	Cichorium	Cichorium_intybus	1979	rbcL	rbcLa-F	rbcLr590	570	33	11	44	526	32	98	494	428	41	7.72	6.08	18.63	93.92	81.37	573	13	32	45	528	9	13	519	515	59	7.85	1.7	2.46	98.3	97.54	574	1054	41	111	1013	943	50	3.89
NMW2145	POWNA2680-12	JN893108	Herbarium	Asterales	Asteraceae	Cichorium	Cichorium_intybus	1975	rbcL	rbcLa-F	rbcLr590	570	31	7	38	532	4	6	528	526	60	6.67	0.75	1.13	99.25	98.87	572	10	27	37	535	4	8	531	527	59	6.47	0.75	1.5	99.25	98.5	580	1067	8	14	1059	1053	60	0.75
NMW2146	POWNA2677-12	JN892789	Herbarium	Asterales	Asteraceae	Cirsium	Cirsium_acaule	1959	rbcL	rbcLa-F	rbcLr590	562	26	11	37	525	4	8	521	517	60	6.58	0.76	1.52	99.24	98.48	568	11	32	43	525	4	11	521	514	59	7.57	0.76	2.1	99.24	97.9	573	1050	8	19	1042	1031	59	0.76
NMW220	POWNA184-10	JN892902	Herbarium	Asterales	Asteraceae	Cirsium	Cirsium_acaule	2000	rbcL	rbcLa-F	rbcLr590	650	25	104	129	521	4	25	517	496	47	19.85	0.77	4.8	99.23	95.2	543	3	32	35	508	4	21	504	487	52	6.45	0.79	4.13	99.21	95.87	562	1029	8	46	1021	983	50	0.78
NMW2147	POWNA2678-12	JN892792	Herbarium	Asterales	Asteraceae	Cirsium	Cirsium_acaule	1955	rbcL	rbcLa-F	rbcLr590	569	29	5	34	535	4	9	531	526	60	5.98	0.75	1.68	99.25	98.32	572	4	31	35	537	4	10	533	527	59	6.12	0.74	1.86	99.26	98.14	588	1072	8	19	1064	1053	59	0.75
NMW2148	POWNA2675-12	JN892782	Herbarium	Asterales	Asteraceae	Cirsium	Cirsium_arvense	1966	rbcL	rbcLa-F	rbcLr590	565	26	16	42	523	5	14	518	509	54	7.43	0.96	2.68	99.04	97.32	572	18	28	46	526	4	7	522	519	60	8.04	0.76	1.33	99.24	98.67	566	1049	9	21	1040	1028	57	0.86
NBGW7005	POWNB178-10	JN893242	Fresh	Asterales	Asteraceae	Cirsium	Cirsium_arvense	2010	rbcL	rbcLa-F	rbcLr590	565	25	14	39	526	4	7	522	519	58	6.9	0.76	1.33	99.24	98.67	565	15	30	45	520	4	6	516	514	58	7.96	0.77	1.15	99.23	98.85	567	1046	8	13	1038	1033	58	0.76
NMW2150	POWNA2494-12	JN891429	Herbarium	Asterales	Asteraceae	Cirsium	Cirsium_arvense	1987	rbcL	rbcLa-F	rbcLr590	569	30	10	40	529	21	53	508	476	46	7.03	3.97	10.02	96.03	89.98	571	12	31	43	528	4	9	524	519	59	7.53	0.76	1.7	99.24	98.3	576	1057	25	62	1032	995	52	2.37
NMW5198	POWNB064-10	JN892497	Fresh	Asterales	Asteraceae	Cirsium	Cirsium_arvense	2010	rbcL	rbcLa-F	rbcLr590	568	22	15	37	531	4	8	527	523	59	6.51	0.75	1.51	99.25	98.49	571	12	30	42	529	4	15	525	514	58	7.36	0.76	2.84	99.24	97.16	573	1060	8	23	1052	1037	58	0.75
NMW2152	POWNA2496-12	JN892859	Herbarium	Asterales	Asteraceae	Cirsium	Cirsium_dissectum	1959	rbcL	rbcLa-F	rbcLr590	568	29	18	47	521	4	7	517	514	60	8.27	0.77	1.34	99.23	98.66	571	13	33	46	525	4	5	521	520	59	8.06	0.76	0.95	99.24	99.05	566	1046	8	12	1038	1034	59	0.76
NMW222	POWNA185-10	JN892904	Herbarium	Asterales	Asteraceae	Cirsium	Cirsium_dissectum	1997	rbcL	rbcLa-F	rbcLr590	648	27	101	128	520	4	20	516	500	47	19.75	0.77	3.85	99.23	96.15	561	21	23	44	517	4	9	513	508	56	7.84	0.77	1.74	99.23	98.26	561	1037	8	29	1029	1008	51	0.77
NMW2151	POWNA2493-12	JN892856	Herbarium	Asterales	Asteraceae	Cirsium	Cirsium_dissectum	1982	rbcL	rbcLa-F	rbcLr590	571	32	6	38	533	4	6	529	527	60	6.65	0.75	1.13	99.25	98.87	573	1	32	33	540	4	11	536	529	59	5.76	0.74	2.04	99.26	97.96	591	1073	8	17	1065	1056	60	0.75
NMW223	POWNA895-10	JN892905	Herbarium	Asterales	Asteraceae	Cirsium	Cirsium_eriophorum	1957	rbcL	rbcLa-F	rbcLr590	854	86	294	380	474	7	20	467	454	48	44.5	1.48	4.22	98.52	95.78	872	310	94	404	468	4	13	464	455	50	46.33	0.85	2.78	99.15	97.22	578	942	11	33	931	909	49	1.17
NMW2153	POWNA2495-12	JN892858	Herbarium	Asterales	Asteraceae	Cirsium	Cirsium_eriophorum	1952	rbcL	rbcLa-F	rbcLr590	559	24	9	33	526	4	8	522	518	59	5.9	0.76	1.52	99.24	98.48	570	13	28	41	529	4	7	525	522	60	7.19	0.76	1.32	99.24	98.68	573	1055	8	15	1047	1040	59	0.76
NMW2154	POWNA2498-12	JN892861	Herbarium	Asterales	Asteraceae	Cirsium	Cirsium_eriophorum	1949	rbcL	rbcLa-F	rbcLr590	575	37	6	43	532	4	7	528	525	60	7.48	0.75	1.32	99.25	98.68	570	2	28	30	540	4	8	536	532	59	5.26	0.74	1.48	99.26	98.52	589	1072	8	15	1064	1057	60	0.75
NMW1003	POWNA186-10	JN891314	Herbarium	Asterales	Asteraceae	Cirsium	Cirsium_heterophyllum	1974	rbcL	rbcLa-F	rbcLr590	644	31	93	124	520	6	29	514	491	45	19.25	1.15	5.58	98.85	94.42	637	88	26	114	523	5	26	518	497	50	17.9	0.96	4.97	99.04	95.03	570	1043	11	55	1032	988	48	1.05
NMW2155	POWNA2497-12	JN892860	Herbarium	Asterales	Asteraceae	Cirsium	Cirsium_heterophyllum	1971	rbcL	rbcLa-F	rbcLa-R	583	44	0	44	539	8	23	531	516	54	7.55	1.48	4.27	98.52	95.73	584	12	49	61	523	11	33	512	490	54	10.45	2.1	6.31	97.9	93.69	590	1062	19	56	1043	1006	54	1.79
NMW2156	POWNA2500-12	JN891898	Herbarium	Asterales	Asteraceae	Cirsium	Cirsium_heterophyllum	1986	rbcL	rbcLa-F	rbcLr590	564	25	18	43	521	4	6	517	515	60	7.62	0.77	1.15	99.23	98.85	571	13	29	42	529	4	8	525	521	59	7.36	0.76	1.51	99.24	98.49	568	1050	8	14	1042	1036	60	0.76
NMW2158	POWNA2501-12	JN891456	Herbarium	Asterales	Asteraceae	Cirsium	Cirsium_palustre	1965	rbcL	rbcLa-F	rbcLr590	565	29	8	37	528	4	6	524	522	59	6.55	0.76	1.14	99.24	98.86	572	10	32	42	530	4	14	526	516	54	7.34	0.75	2.64	99.25	97.36	577	1058	8	20	1050	1038	56	0.76
NMW6275	POWNA2159-12	JN892371	Fresh	Asterales	Asteraceae	Cirsium	Cirsium_palustre	2011	rbcL	rbcLa-F	rbcLr590	566	27	13	40	526	4	9	522	517	56	7.07	0.76	1.71	99.24	98.29	568	11	27	38	530	4	8	526	522	60	6.69	0.75	1.51	99.25	98.49	572	1056	8	17	1048	1039	58	0.76
NBGW2003	POWNA187-10	JN892815	Herbarium	Asterales	Asteraceae	Cirsium	Cirsium_palustre	2008	rbcL	rbcLa-F	rbcLr590	562	23	14	37	525	5	13	520	512	58	6.58	0.95	2.48	99.05	97.52	538	3	24	27	511	15	18	496	493	57	5.02	2.94	3.52	97.06	96.48	567	1036	20	31	1016	1005	57	1.93
NMW2157	POWNA2499-12	JN891442	Herbarium	Asterales	Asteraceae	Cirsium	Cirsium_palustre	2003	rbcL	rbcLa-F	rbcLr590	569	32	6	38	531	4	6	527	525	60	6.68	0.75	1.13	99.25	98.87	568	1	26	27	541	4	10	537	531	59	4.75	0.74	1.85	99.26	98.15	587	1072	8	16	1064	1056	60	0.75
NBGW6062	POWNB220-10	JN890696	Fresh	Asterales	Asteraceae	Cirsium	Cirsium_tuberosum	2010	rbcL	rbcLa-F	rbcLr590	838	26	55	81	757	67	132	690	625	49	9.67	8.85	17.44	91.15	82.56	863	311	26	337	526	5	13	521	513	55	39.05	0.95	2.47	99.05	97.53	803	1283	72	145	1211	1138	51	5.61
NMW1001	POWNA896-10	JN891316	Herbarium	Asterales	Asteraceae	Cirsium	Cirsium_tuberosum	1985	rbcL	rbcLa-F	rbcLr590	558	39	2	41	517	4	7	513	510	59	7.35	0.77	1.35	99.23	98.65	654	90	35	125	529	5	20	524	509	58	19.11	0.95	3.78	99.05	96.22	577	1046	9	27	1037	1019	58	0.86
NMW2161	POWNA2356-12	JN892654	Herbarium	Asterales	Asteraceae	Cirsium	Cirsium_tuberosum	1906	rbcL	rbcLa-F	rbcLr590	572	73	6	79	493	4	13	489	480	51	13.81	0.81	2.64	99.19	97.36	573	13	38	51	522	10	14	512	508	58	8.9	1.92	2.68	98.08	97.32	578	1015	14	27	1001	988	55	1.38
NMW2160	POWNA2355-12	JN892653	Herbarium	Asterales	Asteraceae	Cirsium	Cirsium_tuberosum	1982	rbcL	rbcLa-F	rbcLr590	569	28	15	43	526	8	33	518	493	51	7.56	1.52	6.27	98.48	93.73	567	11	25	36	531	4	11	527	520	59	6.35	0.75	2.07	99.25	97.93	573	1057	12	44	1045	1013	55	1.14
NMW893	POWNA188-10	JN893315	Herbarium	Asterales	Asteraceae	Cirsium	Cirsium_vulgare	1979	rbcL	rbcLa-F	rbcLr590	722	26	176	202	520	4	22	516	498	48	27.98	0.77	4.23	99.23	95.77	686	138	49	187	499	5	25	494	474	50	27.26	1	5.01	99	94.99	567	1019	9	47	1010	972	49	0.88
NMW6368	POWNA1486-12	JN891377	Fresh	Asterales	Asteraceae	Cirsium	Cirsium_vulgare	2011	rbcL	rbcLa-F	rbcLr590	562	25	10	35	527	4	9	523	518	57	6.23	0.76	1.71	99.24	98.29	566	11	27	38	528	4	7	524	521	59	6.71	0.76	1.33	99.24	98.67	571	1055	8	16	1047	1039	58	0.76
NMW2163	POWNA2358-12	JN892150	Herbarium	Asterales	Asteraceae	Cirsium	Cirsium_vulgare	1945	rbcL	rbcLa-F	rbcLr590	564	27	9	36	528	4	9	524	519	56	6.38	0.76	1.7	99.24	98.3	569	5	31	36	533	6	17	527	516	54	6.33	1.13	3.19	98.87	96.81	580	1061	10	26	1051	1035	55	0.94
NMW2162	POWNA2357-12	JN892655	Herbarium	Asterales	Asteraceae	Cirsium	Cirsium_vulgare	1966	rbcL	rbcLa-F	rbcLr590	566	27	4	31	535	4	9	531	526	60	5.48	0.75	1.68	99.25	98.32	569	0	27	27	542	15	23	527	519	58	4.75	2.77	4.24	97.23	95.76	589	1077	19	32	1058	1045	59	1.76
NMW243	POWNA201-10	JN891592	Herbarium	Asterales	Asteraceae	Crepis	Crepis_biennis	1997	rbcL	rbcLa-F	rbcLr590	562	30	12	42	520	7	24	513	496	48	7.47	1.35	4.62	98.65	95.38	560	14	33	47	513	6	29	507	484	47	8.39	1.17	5.65	98.83	94.35	569	1033	13	53	1020	980	48	1.26
NMW2164	POWNA2352-12	JN892650	Herbarium	Asterales	Asteraceae	Crepis	Crepis_biennis	2003	rbcL	rbcLa-F	rbcLr590	568	31	5	36	532	4	7	528	525	60	6.34	0.75	1.32	99.25	98.68	567	3	22	25	542	4	12	538	530	59	4.41	0.74	2.21	99.26	97.79	584	1074	8	19	1066	1055	59	0.74
NMW2167	POWNA2354-12	JN892652	Herbarium	Asterales	Asteraceae	Crepis	Crepis_capillaris	1985	rbcL	rbcLa-F	rbcLr590	575	56	4	60	515	4	5	511	510	60	10.43	0.78	0.97	99.22	99.03	573	9	53	62	511	4	5	507	506	60	10.82	0.78	0.98	99.22	99.02	582	1026	8	10	1018	1016	60	0.78
NMW2166	POWNA2353-12	JN892651	Herbarium	Asterales	Asteraceae	Crepis	Crepis_capillaris	1996	rbcL	rbcLa-F	rbcLr590	569	29	9	38	531	5	11	526	520	56	6.68	0.94	2.07	99.06	97.93	569	15	27	42	527	4	6	523	521	59	7.38	0.76	1.14	99.24	98.86	575	1058	9	17	1049	1041	58	0.85
NMW244	POWNA202-10	JN891589	Herbarium	Asterales	Asteraceae	Crepis	Crepis_capillaris	1991	rbcL	rbcLa-F	rbcLr590	561	27	17	44	517	5	22	512	495	46	7.84	0.97	4.26	99.03	95.74	563	17	24	41	522	4	11	518	511	56	7.28	0.77	2.11	99.23	97.89	565	1039	9	33	1030	1006	51	0.87
NMW6412	POWNA2775-12	JN893254	Fresh	Asterales	Asteraceae	Crepis	Crepis_capillaris	2011	rbcL	rbcLa-F	rbcLr590	563	28	10	38	525	4	10	521	515	56	6.75	0.76	1.9	99.24	98.1	568	12	26	38	530	4	9	526	521	59	6.69	0.75	1.7	99.25	98.3	571	1055	8	19	1047	1036	58	0.76
NMW245	POWNA203-10	JN891590	Herbarium	Asterales	Asteraceae	Crepis	Crepis_mollis	1923	rbcL	rbcLa-F	rbcLr590	561	28	15	43	518	4	26	514	492	48	7.66	0.77	5.02	99.23	94.98	564	18	27	45	519	4	21	515	498	50	7.98	0.77	4.05	99.23	95.95	564	1037	8	47	1029	990	49	0.77
NMW2169	POWNA2359-12	JN892236	Herbarium	Asterales	Asteraceae	Crepis	Crepis_mollis	1908	rbcL	rbcLa-F	rbcLr590	577	40	12	52	525	6	10	519	515	54	9.01	1.14	1.9	98.86	98.1	572	12	31	43	529	4	11	525	518	59	7.52	0.76	2.08	99.24	97.92	577	1054	10	21	1044	1033	57	0.95
NMW246	POWNA204-10	JN891587	Herbarium	Asterales	Asteraceae	Crepis	Crepis_paludosa	1966	rbcL	rbcLa-F	rbcLr590	643	67	86	153	490	11	30	479	460	46	23.79	2.24	6.12	97.76	93.88	636	88	90	178	458	4	7	454	451	55	27.99	0.87	1.53	99.13	98.47	575	948	15	37	933	911	50	1.58
NMW2170	POWNA2220-12	JN892377	Herbarium	Asterales	Asteraceae	Crepis	Crepis_paludosa	1990	rbcL	rbcLa-F	rbcLr590	568	31	33	64	504	23	83	481	421	41	11.27	4.56	16.47	95.44	83.53	567	14	29	43	524	4	8	520	516	60	7.58	0.76	1.53	99.24	98.47	550	1028	27	91	1001	937	50	2.63
NMW2171	POWNA2219-12	JN892441	Herbarium	Asterales	Asteraceae	Crepis	Crepis_paludosa	1958	rbcL	rbcLa-F	rbcLr590	570	31	6	37	533	12	13	521	520	60	6.49	2.25	2.44	97.75	97.56	569	0	31	31	538	4	9	534	529	59	5.45	0.74	1.67	99.26	98.33	590	1071	16	22	1055	1049	59	1.49
NMW2173	POWNA2217-12	JN892439	Herbarium	Asterales	Asteraceae	Erigeron	Erigeron_acer	2000	rbcL	rbcLa-F	rbcLr590	568	30	14	44	524	5	13	519	511	55	7.75	0.95	2.48	99.05	97.52	568	14	32	46	522	4	6	518	516	60	8.1	0.77	1.15	99.23	98.85	568	1046	9	19	1037	1027	57	0.86
NMW2172	POWNA2218-12	JN892440	Herbarium	Asterales	Asteraceae	Erigeron	Erigeron_acer	2005	rbcL	rbcLa-F	rbcLr590	563	26	11	37	526	7	21	519	505	52	6.57	1.33	3.99	98.67	96.01	569	14	29	43	526	4	10	522	516	59	7.56	0.76	1.9	99.24	98.1	571	1052	11	31	1041	1021	56	1.05
NMW5302	POWNB125-10	JN893645	Fresh	Asterales	Asteraceae	Erigeron	Erigeron_acer	2010	rbcL	rbcLa-F	rbcLr590	565	28	13	41	524	4	7	520	517	59	7.26	0.76	1.34	99.24	98.66	566	15	26	41	525	4	8	521	517	59	7.24	0.76	1.52	99.24	98.48	568	1049	8	15	1041	1034	59	0.76
NMW321	POWNA261-10	JN891100	Herbarium	Asterales	Asteraceae	Eupatorium	Eupatorium_cannabinum	2003	rbcL	rbcLa-F	rbcLr590	886	32	337	369	517	5	11	512	506	52	41.65	0.97	2.13	99.03	97.87	733	184	28	212	521	4	8	517	513	58	28.92	0.77	1.54	99.23	98.46	566	1038	9	19	1029	1019	55	0.87
NMW2176	POWNA2215-12	JN892437	Herbarium	Asterales	Asteraceae	Eupatorium	Eupatorium_cannabinum	2002	rbcL	rbcLa-F	rbcLr590	569	30	21	51	518	26	64	492	454	43	8.96	5.02	12.36	94.98	87.64	571	12	29	41	530	5	11	525	519	59	7.18	0.94	2.08	99.06	97.92	566	1048	31	75	1017	973	51	2.96
NMW2175	POWNA2216-12	JN892438	Herbarium	Asterales	Asteraceae	Eupatorium	Eupatorium_cannabinum	1987	rbcL	rbcLa-F	rbcLr590	569	30	6	36	533	4	7	529	526	60	6.33	0.75	1.31	99.25	98.69	567	4	32	36	531	4	9	527	522	59	6.35	0.75	1.69	99.25	98.31	585	1064	8	16	1056	1048	60	0.75
NMW355	POWNA292-10	JN891049	Herbarium	Asterales	Asteraceae	Filago	Filago_minima	1990	rbcL	rbcLa-F	rbcLr590	618	25	71	96	522	4	36	518	486	46	15.53	0.77	6.9	99.23	93.1	638	89	23	112	526	5	31	521	495	50	17.55	0.95	5.89	99.05	94.11	573	1048	9	67	1039	981	48	0.86
NMW2178	POWNA2222-12	JN892444	Herbarium	Asterales	Asteraceae	Filago	Filago_minima	1996	rbcL	rbcLa-F	rbcLr590	564	29	3	32	532	4	6	528	526	60	5.67	0.75	1.13	99.25	98.87	571	7	35	42	529	4	6	525	523	60	7.36	0.76	1.13	99.24	98.87	581	1061	8	12	1053	1049	60	0.75
NMW356	POWNA293-10	JN891050	Herbarium	Asterales	Asteraceae	Filago	Filago_vulgaris	2000	rbcL	rbcLa-F	rbcLr590	619	28	69	97	522	5	23	517	499	46	15.67	0.96	4.41	99.04	95.59	643	91	25	116	527	5	28	522	499	50	18.04	0.95	5.31	99.05	94.69	572	1049	10	51	1039	998	48	0.95
NMW2179	POWNA2221-12	JN892443	Herbarium	Asterales	Asteraceae	Filago	Filago_vulgaris	1996	rbcL	rbcLa-F	rbcLr590	574	41	11	52	522	7	24	515	498	49	9.06	1.34	4.6	98.66	95.4	575	12	43	55	520	5	10	515	510	59	9.57	0.96	1.92	99.04	98.08	576	1042	12	34	1030	1008	54	1.15
NMW403	POWNA345-10	JN892964	Herbarium	Asterales	Asteraceae	Gnaphalium	Gnaphalium_uliginosum	2003	rbcL	rbcLa-F	rbcLr590	560	29	11	40	520	6	27	514	493	47	7.14	1.15	5.19	98.85	94.81	560	24	25	49	511	5	28	506	483	49	8.75	0.98	5.48	99.02	94.52	560	1031	11	55	1020	976	48	1.07
NMW6380	POWNA1521-12	JN891441	Fresh	Asterales	Asteraceae	Gnaphalium	Gnaphalium_uliginosum	2011	rbcL	rbcLa-F	rbcLr590	562	25	10	35	527	4	10	523	517	55	6.23	0.76	1.9	99.24	98.1	569	12	33	45	524	4	6	520	518	60	7.91	0.76	1.15	99.24	98.85	572	1051	8	16	1043	1035	58	0.76
NMW2185	POWNA2335-12	JN892633	Herbarium	Asterales	Asteraceae	Gnaphalium	Gnaphalium_uliginosum	1989	rbcL	rbcLa-F	rbcLr590	568	35	11	46	522	13	29	509	493	48	8.1	2.49	5.56	97.51	94.44	568	14	29	43	525	4	6	521	519	59	7.57	0.76	1.14	99.24	98.86	571	1047	17	35	1030	1012	54	1.62
NMW2184	POWNA2334-12	JN892632	Herbarium	Asterales	Asteraceae	Gnaphalium	Gnaphalium_uliginosum	1982	rbcL	rbcLa-F	rbcLr590	576	45	4	49	527	4	6	523	521	60	8.51	0.76	1.14	99.24	98.86	573	0	43	43	530	4	9	526	521	59	7.5	0.75	1.7	99.25	98.3	590	1057	8	15	1049	1042	60	0.76
NMW415	POWNA901-10	JN893222	Herbarium	Asterales	Asteraceae	Hieracium	Hieracium_agg	1998	rbcL	rbcLa-F	rbcLr590	850	30	304	334	516	72	133	444	383	45	39.29	13.95	25.78	86.05	74.22	858	303	28	331	527	4	12	523	515	59	38.58	0.76	2.28	99.24	97.72	565	1043	76	145	967	898	52	7.29
NMW2186	POWNA2332-12	JN892631	Herbarium	Asterales	Asteraceae	Hieracium	Hieracium_agg	1998	rbcL	rbcLa-F	rbcLr590	570	28	18	46	524	11	32	513	492	49	8.07	2.1	6.11	97.9	93.89	570	14	35	49	521	5	11	516	510	59	8.6	0.96	2.11	99.04	97.89	568	1045	16	43	1029	1002	54	1.53
NMW2188	POWNA2329-12	JN892628	Herbarium	Asterales	Asteraceae	Hieracium	Hieracium_agg	1954	rbcL	rbcLa-F	rbcLr590	577	48	4	52	525	4	4	521	521	60	9.01	0.76	0.76	99.24	99.24	577	0	49	49	528	3	5	525	523	60	8.49	0.57	0.95	99.43	99.05	589	1053	7	9	1046	1044	60	0.66
NMW2189	POWNA2784-12	JN893263	Herbarium	Asterales	Asteraceae	Hypochaeris	Hypochaeris_glabra	1995	rbcL	rbcLa-F	rbcLr590	566	28	18	46	520	64	162	456	358	35	8.13	12.31	31.15	87.69	68.85	571	12	32	44	527	4	9	523	518	59	7.71	0.76	1.71	99.24	98.29	567	1047	68	171	979	876	47	6.49
NMW885	POWNA372-10	JN893034	Herbarium	Asterales	Asteraceae	Hypochaeris	Hypochaeris_glabra	2000	rbcL	rbcLa-F	rbcLr590	561	80	19	99	462	10	53	452	409	42	17.65	2.16	11.47	97.84	88.53	561	19	23	42	519	6	43	513	476	46	7.49	1.16	8.29	98.84	91.71	562	981	16	96	965	885	44	1.63
NMW2190	POWNA2197-12	JN891899	Herbarium	Asterales	Asteraceae	Hypochaeris	Hypochaeris_glabra	1984	rbcL	rbcLa-F	rbcLr590	567	31	3	34	533	4	4	529	529	60	6	0.75	0.75	99.25	99.25	570	0	32	32	538	4	7	534	531	59	5.61	0.74	1.3	99.26	98.7	590	1071	8	11	1063	1060	60	0.75
NMW2191	POWNA2196-12	JN892419	Herbarium	Asterales	Asteraceae	Hypochaeris	Hypochaeris_maculata	1868	rbcL	rbcLa-F	rbcLr590	568	57	13	70	498	4	9	494	489	52	12.32	0.8	1.81	99.2	98.19	576	12	72	84	492	4	14	488	478	50	14.58	0.81	2.85	99.19	97.15	571	990	8	23	982	967	51	0.81
NBGW7047	POWNA3202-12	JN890832	Fresh	Asterales	Asteraceae	Hypochaeris	Hypochaeris_radicata	2010	rbcL	rbcLa-F	rbcLr590	571	33	40	73	498	10	49	488	449	48	12.78	2.01	9.84	97.99	90.16	575	19	32	51	524	6	23	518	501	56	8.87	1.15	4.39	98.85	95.61	548	1022	16	72	1006	950	52	1.57
NMW2196	POWNA2195-12	JN892418	Herbarium	Asterales	Asteraceae	Hypochaeris	Hypochaeris_radicata	1996	rbcL	rbcLa-F	rbcLr590	570	31	11	42	528	7	15	521	513	53	7.37	1.33	2.84	98.67	97.16	570	14	27	41	529	4	9	525	520	59	7.19	0.76	1.7	99.24	98.3	572	1057	11	24	1046	1033	56	1.04
NMW2194	POWNA2193-12	JN892416	Herbarium	Asterales	Asteraceae	Hypochaeris	Hypochaeris_radicata	1982	rbcL	rbcLa-F	rbcLr590	567	30	13	43	524	5	18	519	506	53	7.58	0.95	3.44	99.05	96.56	566	10	25	35	531	4	12	527	519	59	6.18	0.75	2.26	99.25	97.74	571	1055	9	30	1046	1025	56	0.85
NBGW6092	POWNB234-10	JN890982	Fresh	Asterales	Asteraceae	Hypochaeris	Hypochaeris_radicata	2010	rbcL	rbcLa-F	rbcLr590	552	29	2	31	521	4	6	517	515	59	5.62	0.77	1.15	99.23	98.85	568	1	33	34	534	4	14	530	520	58	5.99	0.75	2.62	99.25	97.38	580	1055	8	20	1047	1035	59	0.76
NMW2198	POWNA2192-12	JN892415	Herbarium	Asterales	Asteraceae	Inula	Inula_conyzae	1936	rbcL	rbcLa-F	rbcLa-R	581	61	102	163	418	25	118	393	300	35	28.06	5.98	28.23	94.02	71.77	576	14	68	82	494	4	8	490	486	52	14.24	0.81	1.62	99.19	98.38	494	912	29	126	883	786	44	3.18
NMW2197	POWNA2194-12	JN892417	Herbarium	Asterales	Asteraceae	Inula	Inula_conyzae	1971	rbcL	rbcLa-F	rbcLr590	614	26	70	96	518	4	9	514	509	59	15.64	0.77	1.74	99.23	98.26	570	13	28	41	529	4	10	525	519	59	7.19	0.76	1.89	99.24	98.11	564	1047	8	19	1039	1028	59	0.76
NMW2199	POWNA2191-12	JN892414	Herbarium	Asterales	Asteraceae	Inula	Inula_conyzae	1983	rbcL	rbcLa-F	rbcLr590	570	29	6	35	535	4	10	531	525	60	6.14	0.75	1.87	99.25	98.13	567	9	30	39	528	4	8	524	520	60	6.88	0.76	1.52	99.24	98.48	580	1063	8	18	1055	1045	60	0.75
NMW5306	POWNB117-10	JN893641	Fresh	Asterales	Asteraceae	Inula	Inula_crithmoides	2010	rbcL	rbcLa-F	rbcLr590	568	27	13	40	528	4	12	524	516	58	7.04	0.76	2.27	99.24	97.73	571	16	34	50	521	5	8	516	513	59	8.76	0.96	1.54	99.04	98.46	569	1049	9	20	1040	1029	58	0.86
NMW420	POWNA375-10	JN892523	Herbarium	Asterales	Asteraceae	Inula	Inula_helenium		rbcL	rbcLa-F	rbcLr590	564	37	14	51	513	5	31	508	482	46	9.04	0.97	6.04	99.03	93.96	567	17	37	54	513	4	9	509	504	57	9.52	0.78	1.75	99.22	98.25	567	1026	9	40	1017	986	51	0.88
NMW2203	POWNA3196-12	JN893825	Herbarium	Asterales	Asteraceae	Inula	Inula_helenium	1977	rbcL	rbcLa-F	rbcLr590	567	30	33	63	504	46	124	458	380	37	11.11	9.13	24.6	90.87	75.4	569	12	29	41	528	4	9	524	519	59	7.21	0.76	1.7	99.24	98.3	551	1032	50	133	982	899	48	4.84
NMW2204	POWNA3199-12	JN893846	Herbarium	Asterales	Asteraceae	Inula	Inula_helenium	1988	rbcL	rbcLa-F	rbcLr590	572	34	5	39	533	4	4	529	529	60	6.82	0.75	0.75	99.25	99.25	571	5	31	36	535	4	9	531	526	59	6.3	0.75	1.68	99.25	98.32	587	1068	8	13	1060	1055	60	0.75
NMW2206	POWNA3201-12	JN893848	Herbarium	Asterales	Asteraceae	Lactuca	Lactuca_serriola	1992	rbcL	rbcLa-F	rbcLr590	564	28	15	43	521	4	6	517	515	60	7.62	0.77	1.15	99.23	98.85	568	10	34	44	524	4	8	520	516	59	7.75	0.76	1.53	99.24	98.47	568	1045	8	14	1037	1031	59	0.77
NBGW2019	POWNA398-10	JN892548	Fresh	Asterales	Asteraceae	Lactuca	Lactuca_serriola	2008	rbcL	rbcLa-F	rbcLr590	561	24	13	37	524	6	11	518	513	58	6.6	1.15	2.1	98.85	97.9	559	17	21	38	521	9	12	512	509	57	6.8	1.73	2.3	98.27	97.7	567	1045	15	23	1030	1022	58	1.44
NMW2205	POWNA3198-12	JN891430	Herbarium	Asterales	Asteraceae	Lactuca	Lactuca_serriola	1992	rbcL	rbcLa-F	rbcLr590	568	27	7	34	534	4	8	530	526	60	5.99	0.75	1.5	99.25	98.5	569	5	27	32	537	4	10	533	527	59	5.62	0.74	1.86	99.26	98.14	584	1071	8	18	1063	1053	60	0.75
NMW468	POWNA399-10	JN891646	Herbarium	Asterales	Asteraceae	Lactuca	Lactuca_virosa	1995	rbcL	rbcLa-F	rbcLr590	564	37	14	51	513	5	26	508	487	47	9.04	0.97	5.07	99.03	94.93	563	16	33	49	514	4	4	510	510	56	8.7	0.78	0.78	99.22	99.22	566	1027	9	30	1018	997	51	0.88
NMW2207	POWNA3200-12	JN893847	Herbarium	Asterales	Asteraceae	Lactuca	Lactuca_virosa	1991	rbcL	rbcLa-F	rbcLr590	568	29	11	40	528	4	4	524	524	60	7.04	0.76	0.76	99.24	99.24	573	1	33	34	539	4	11	535	528	59	5.93	0.74	2.04	99.26	97.96	585	1067	8	15	1059	1052	60	0.75
NMW2208	POWNA3189-12	JN893836	Herbarium	Asterales	Asteraceae	Lactuca	Lactuca_virosa	1989	rbcL	rbcLa-F	rbcLr590	563	15	18	33	530	4	11	526	519	59	5.86	0.75	2.08	99.25	97.92	570	2	31	33	537	4	19	533	518	58	5.79	0.74	3.54	99.26	96.46	574	1067	8	30	1059	1037	59	0.75
NMW5023	POWNB014-10	JN893425	Fresh	Asterales	Asteraceae	Lapsana	Lapsana_communis	2010	rbcL	rbcLa-F	rbcLr590	568	29	14	43	525	4	9	521	516	59	7.57	0.76	1.71	99.24	98.29	573	8	32	40	533	4	15	529	518	57	6.98	0.75	2.81	99.25	97.19	576	1058	8	24	1050	1034	58	0.76
NMW6201	POWNA2985-12	JN892070	Fresh	Asterales	Asteraceae	Lapsana	Lapsana_communis	2011	rbcL	rbcLa-F	rbcLr590	563	25	14	39	524	4	5	520	519	59	6.93	0.76	0.95	99.24	99.05	565	10	27	37	528	4	9	524	519	60	6.55	0.76	1.7	99.24	98.3	570	1052	8	14	1044	1038	59	0.76
NMW2211	POWNA1074-12	JN890756	Herbarium	Asterales	Asteraceae	Lapsana	Lapsana_communis	1958	rbcL	rbcLa-F	rbcLr590	572	31	8	39	533	4	7	529	526	60	6.82	0.75	1.31	99.25	98.69	569	4	28	32	537	4	10	533	527	59	5.62	0.74	1.86	99.26	98.14	585	1070	8	17	1062	1053	60	0.75
NMW2210	POWNA1073-12	JN890755	Herbarium	Asterales	Asteraceae	Lapsana	Lapsana_communis	1924	rbcL	rbcLa-F	rbcLr590	566	29	3	32	534	4	6	530	528	60	5.65	0.75	1.12	99.25	98.88	568	1	29	30	538	4	8	534	530	59	5.28	0.74	1.49	99.26	98.51	588	1072	8	14	1064	1058	60	0.75
NMW5112	POWNB038-10	JN893525	Fresh	Asterales	Asteraceae	Leontodon	Leontodon_autumnalis	2010	rbcL	rbcLa-F	rbcLa-R	675	29	115	144	531	4	6	527	525	59	21.33	0.75	1.13	99.25	98.87	578	156	40	196	382	19	69	363	313	43	33.91	4.97	18.06	95.03	81.94	531	913	23	75	890	838	52	2.52
NMW2212	POWNA1072-12	JN890754	Herbarium	Asterales	Asteraceae	Leontodon	Leontodon_autumnalis	1958	rbcL	rbcLa-F	rbcLr590	580	49	27	76	504	5	12	499	492	54	13.1	0.99	2.38	99.01	97.62	575	7	62	69	506	4	11	502	495	57	12	0.79	2.17	99.21	97.83	565	1010	9	23	1001	987	56	0.89
NMW2214	POWNA1810-12	JN891885	Herbarium	Asterales	Asteraceae	Leontodon	Leontodon_autumnalis	1963	rbcL	rbcLa-F	rbcLr590	567	40	61	101	466	14	70	452	396	39	17.81	3	15.02	97	84.98	569	12	46	58	511	4	6	507	505	59	10.19	0.78	1.17	99.22	98.83	523	977	18	76	959	901	50	1.84
NMW486	POWNA416-10	JN891581	Herbarium	Asterales	Asteraceae	Leontodon	Leontodon_hispidus	1977	rbcL	rbcLa-F	rbcLr590	621	37	70	107	514	7	25	507	489	46	17.23	1.36	4.86	98.64	95.14	628	79	28	107	521	4	17	517	504	54	17.04	0.77	3.26	99.23	96.74	568	1035	11	42	1024	993	50	1.06
NMW2215	POWNA1071-12	JN890753	Herbarium	Asterales	Asteraceae	Leontodon	Leontodon_hispidus	1985	rbcL	rbcLa-F	rbcLr590	571	29	19	48	523	10	29	513	494	50	8.41	1.91	5.54	98.09	94.46	567	14	26	40	527	4	8	523	519	59	7.05	0.76	1.52	99.24	98.48	567	1050	14	37	1036	1013	55	1.33
NMW2216	POWNA1069-12	JN890750	Herbarium	Asterales	Asteraceae	Leontodon	Leontodon_hispidus	1963	rbcL	rbcLa-F	rbcLr590	571	32	11	43	528	4	6	524	522	60	7.53	0.76	1.14	99.24	98.86	571	5	34	39	532	4	8	528	524	59	6.83	0.75	1.5	99.25	98.5	580	1060	8	14	1052	1046	60	0.75
NMW487	POWNA907-10	JN891582	Herbarium	Asterales	Asteraceae	Leontodon	Leontodon_saxatilis	1997	rbcL	rbcLa-F	rbcLr590	564	26	16	42	522	4	4	518	518	60	7.45	0.77	0.77	99.23	99.23	566	15	25	40	526	4	8	522	518	59	7.07	0.76	1.52	99.24	98.48	565	1048	8	12	1040	1036	59	0.76
NMW5190	POWNB069-10	JN892492	Fresh	Asterales	Asteraceae	Leontodon	Leontodon_saxatilis	2010	rbcL	rbcLa-F	rbcLr590	567	28	13	41	526	4	9	522	517	58	7.23	0.76	1.71	99.24	98.29	567	11	29	40	527	5	11	522	516	59	7.05	0.95	2.09	99.05	97.91	571	1053	9	20	1044	1033	59	0.85
NMW2219	POWNA1815-12	JN891901	Herbarium	Asterales	Asteraceae	Leontodon	Leontodon_saxatilis	1998	rbcL	rbcLa-F	rbcLr590	569	30	33	63	506	41	128	465	378	37	11.07	8.1	25.3	91.9	74.7	569	12	28	40	529	4	10	525	519	59	7.03	0.76	1.89	99.24	98.11	555	1035	45	138	990	897	48	4.35
NMW2218	POWNA1813-12	JN891900	Herbarium	Asterales	Asteraceae	Leontodon	Leontodon_saxatilis	1988	rbcL	rbcLa-F	rbcLr590	569	30	32	62	507	25	99	482	408	39	10.9	4.93	19.53	95.07	80.47	569	12	27	39	530	4	12	526	518	59	6.85	0.75	2.26	99.25	97.74	553	1037	29	111	1008	926	49	2.8
NMW2217	POWNA1070-12	JN890751	Herbarium	Asterales	Asteraceae	Leontodon	Leontodon_saxatilis	1995	rbcL	rbcLa-F	rbcLr590	666	23	115	138	528	4	10	524	518	56	20.72	0.76	1.89	99.24	98.11	564	12	23	35	529	4	8	525	521	59	6.21	0.76	1.51	99.24	98.49	570	1057	8	18	1049	1039	58	0.76
NBGW2014	POWNA421-10	JN893039	Fresh	Asterales	Asteraceae	Leucanthemum	Leucanthemum_vulgare	2008	rbcL	rbcLa-F	rbcLr590	569	45	19	64	505	5	14	500	491	58	11.25	0.99	2.77	99.01	97.23	538	1	45	46	492	4	10	488	482	58	8.55	0.81	2.03	99.19	97.97	569	997	9	24	988	973	58	0.9
NBGW7264	POWNA1652-12	JN891654	Fresh	Asterales	Asteraceae	Leucanthemum	Leucanthemum_vulgare	2011	rbcL	rbcLa-F	rbcLr590	568	34	2	36	532	4	5	528	527	60	6.34	0.75	0.94	99.25	99.06	569	15	33	48	521	4	7	517	514	59	8.44	0.77	1.34	99.23	98.66	576	1053	8	12	1045	1041	59	0.76
NMW2220	POWNA2910-12	JN892458	Herbarium	Asterales	Asteraceae	Leucanthemum	Leucanthemum_vulgare	1999	rbcL	rbcLa-F	rbcLr590	645	32	88	120	525	9	36	516	489	50	18.6	1.71	6.86	98.29	93.14	571	11	36	47	524	4	9	520	515	59	8.23	0.76	1.72	99.24	98.28	573	1049	13	45	1036	1004	55	1.24
NMW2221	POWNA2909-12	JN891978	Herbarium	Asterales	Asteraceae	Leucanthemum	Leucanthemum_vulgare	1998	rbcL	rbcLa-F	rbcLr590	576	37	7	44	532	4	11	528	521	58	7.64	0.75	2.07	99.25	97.93	573	9	38	47	526	4	12	522	514	58	8.2	0.76	2.28	99.24	97.72	580	1058	8	23	1050	1035	58	0.76
NMW877	POWNA457-10	JN891648	Herbarium	Asterales	Asteraceae	Matricaria	Matricaria_recutita	1991	rbcL	rbcLa-F	rbcLr590	561	26	16	42	519	9	68	510	451	41	7.49	1.73	13.1	98.27	86.9	648	98	26	124	524	4	13	520	511	52	19.14	0.76	2.48	99.24	97.52	568	1043	13	81	1030	962	47	1.25
NMW2223	POWNA2907-12	JN892268	Herbarium	Asterales	Asteraceae	Matricaria	Matricaria_recutita	2002	rbcL	rbcLa-F	rbcLr590	574	45	11	56	518	5	18	513	500	53	9.76	0.97	3.47	99.03	96.53	579	9	44	53	526	4	10	522	516	58	9.15	0.76	1.9	99.24	98.1	577	1044	9	28	1035	1016	55	0.86
NMW2222	POWNA1562-12	JN893454	Herbarium	Asterales	Asteraceae	Matricaria	Matricaria_recutita	1975	rbcL	rbcLa-F	rbcLr590	568	32	11	43	525	4	9	521	516	59	7.57	0.76	1.71	99.24	98.29	569	8	37	45	524	4	9	520	515	58	7.91	0.76	1.72	99.24	98.28	573	1049	8	18	1041	1031	59	0.76
NMW557	POWNA481-10	JN893440	Herbarium	Asterales	Asteraceae	Mycelis	Mycelis_muralis	1992	rbcL	rbcLa-F	rbcLr590	564	30	14	44	520	8	54	512	466	43	7.8	1.54	10.38	98.46	89.62	562	21	33	54	508	7	61	501	447	45	9.61	1.38	12.01	98.62	87.99	561	1028	15	115	1013	913	44	1.46
NMW2224	POWNA2906-12	JN891043	Herbarium	Asterales	Asteraceae	Mycelis	Mycelis_muralis	1962	rbcL	rbcLa-F	rbcLr590	574	36	7	43	531	4	6	527	525	60	7.49	0.75	1.13	99.25	98.87	570	4	34	38	532	4	6	528	526	60	6.67	0.75	1.13	99.25	98.87	587	1063	8	12	1055	1051	60	0.75
NMW2225	POWNA2905-12	JN891038	Herbarium	Asterales	Asteraceae	Mycelis	Mycelis_muralis	1992	rbcL	rbcLa-F	rbcLr590	740	30	182	212	528	14	44	514	484	48	28.65	2.65	8.33	97.35	91.67	568	10	27	37	531	4	14	527	517	59	6.51	0.75	2.64	99.25	97.36	576	1059	18	58	1041	1001	54	1.7
NMW583	POWNA503-10	JN892529	Herbarium	Asterales	Asteraceae	Onopordum	Onopordum_acanthium	1974	rbcL	rbcLa-F	rbcLr590	623	29	72	101	522	9	40	513	482	45	16.21	1.72	7.66	98.28	92.34	620	71	27	98	522	4	14	518	508	51	15.81	0.77	2.68	99.23	97.32	568	1044	13	54	1031	990	48	1.25
NMW2226	POWNA2904-12	JN893408	Herbarium	Asterales	Asteraceae	Onopordum	Onopordum_acanthium	1932	rbcL	rbcLa-F	rbcLr590	564	27	8	35	529	28	46	501	483	55	6.21	5.29	8.7	94.71	91.3	567	11	26	37	530	4	8	526	522	59	6.53	0.75	1.51	99.25	98.49	574	1059	32	54	1027	1005	57	3.02
NMW2227	POWNA2903-12	JN891890	Herbarium	Asterales	Asteraceae	Onopordum	Onopordum_acanthium	1985	rbcL	rbcLa-F	rbcLr590	568	17	8	25	543	4	11	539	532	60	4.4	0.74	2.03	99.26	97.97	568	3	26	29	539	4	9	535	530	59	5.11	0.74	1.67	99.26	98.33	586	1082	8	20	1074	1062	59	0.74
NMW2232	POWNA3042-12	JN893619	Herbarium	Asterales	Asteraceae	Petasites	Petasites_hybridus	1962	rbcL	rbcLa-F	rbcLr590	570	53	10	63	507	6	20	501	487	53	11.05	1.18	3.94	98.82	96.06	568	9	52	61	507	4	8	503	499	60	10.74	0.79	1.58	99.21	98.42	576	1014	10	28	1004	986	56	0.99
NMW2230	POWNA3040-12	JN891406	Herbarium	Asterales	Asteraceae	Petasites	Petasites_hybridus	1961	rbcL	rbcLa-F	rbcLr590	761	53	204	257	504	15	46	489	458	47	33.77	2.98	9.13	97.02	90.87	569	8	50	58	511	4	9	507	502	60	10.19	0.78	1.76	99.22	98.24	570	1015	19	55	996	960	54	1.87
NMW2231	POWNA3041-12	JN891710	Herbarium	Asterales	Asteraceae	Petasites	Petasites_hybridus	1980	rbcL	rbcLa-F	rbcLr590	678	36	111	147	531	4	11	527	520	52	21.68	0.75	2.07	99.25	97.93	569	10	37	47	522	4	10	518	512	59	8.26	0.77	1.92	99.23	98.08	580	1053	8	21	1045	1032	56	0.76
NBGW6022	POWNB149-10	JN892562	Fresh	Asterales	Asteraceae	Petasites	Petasites_hybridus	2010	rbcL	rbcLa-F	rbcLr590	567	29	14	43	524	4	6	520	518	60	7.58	0.76	1.15	99.24	98.85	572	14	30	44	528	4	9	524	519	59	7.69	0.76	1.7	99.24	98.3	569	1052	8	15	1044	1037	59	0.76
NMW2233	POWNA3043-12	JN892459	Herbarium	Asterales	Asteraceae	Picris	Picris_echioides	1989	rbcL	rbcLa-F	rbcLr590	680	60	125	185	495	47	142	448	353	34	27.21	9.49	28.69	90.51	71.31	572	11	37	48	524	4	9	520	515	59	8.39	0.76	1.72	99.24	98.28	576	1019	51	151	968	868	47	5
NMW6362	POWNA1488-12	JN891380	Fresh	Asterales	Asteraceae	Picris	Picris_echioides	2011	rbcL	rbcLa-F	rbcLr590	564	22	10	32	532	4	10	528	522	56	5.67	0.75	1.88	99.25	98.12	569	12	34	46	523	4	9	519	514	59	8.08	0.76	1.72	99.24	98.28	571	1055	8	19	1047	1036	57	0.76
NMW626	POWNA871-10	JN890664	Herbarium	Asterales	Asteraceae	Picris	Picris_echioides	1979	rbcL	rbcLa-F	rbcLr506	476	23	10	33	443	4	15	439	428	57	6.93	0.9	3.39	99.1	96.61	480	12	24	36	444	10	19	434	425	54	7.5	2.25	4.28	97.75	95.72	491	887	14	34	873	853	56	1.58
NMW2234	POWNA3036-12	JN893613	Herbarium	Asterales	Asteraceae	Picris	Picris_echioides	1972	rbcL	rbcLa-F	rbcLr590	573	32	6	38	535	4	4	531	531	60	6.63	0.75	0.75	99.25	99.25	571	4	29	33	538	4	10	534	528	59	5.78	0.74	1.86	99.26	98.14	588	1073	8	14	1065	1059	60	0.75
NMW2235	POWNA3037-12	JN893614	Herbarium	Asterales	Asteraceae	Picris	Picris_hieracioides	1988	rbcL	rbcLa-F	rbcLr590	682	26	135	161	521	12	48	509	473	48	23.61	2.3	9.21	97.7	90.79	565	12	28	40	525	4	9	521	516	59	7.08	0.76	1.71	99.24	98.29	564	1046	16	57	1030	989	54	1.53
NMW2236	POWNA3038-12	JN890580	Herbarium	Asterales	Asteraceae	Picris	Picris_hieracioides	1986	rbcL	rbcLa-F	rbcLr590	571	32	5	37	534	4	7	530	527	60	6.48	0.75	1.31	99.25	98.69	570	8	31	39	531	4	5	527	526	60	6.84	0.75	0.94	99.25	99.06	583	1065	8	12	1057	1053	60	0.75
NMW627	POWNA535-10	JN890665	Herbarium	Asterales	Asteraceae	Picris	Picris_hieracioides	1997	rbcL	rbcLa-F	rbcLr590	563	28	15	43	520	4	19	516	501	49	7.64	0.77	3.65	99.23	96.35	559	15	23	38	521	4	8	517	513	56	6.8	0.77	1.54	99.23	98.46	567	1041	8	27	1033	1014	52	0.77
NBGW2057	POWNA536-10	JN892167	Herbarium	Asterales	Asteraceae	Pilosella	Pilosella_officinarum	2008	rbcL	rbcLa-F	rbcLr590	554	15	16	31	523	10	12	513	511	57	5.6	1.91	2.29	98.09	97.71	569	20	43	63	506	21	33	485	473	55	11.07	4.15	6.52	95.85	93.48	567	1029	31	45	998	984	56	3.01
NMW2238	POWNA3033-12	JN891622	Herbarium	Asterales	Asteraceae	Pilosella	Pilosella_officinarum	1973	rbcL	rbcLa-F	rbcLr590	564	29	3	32	532	4	12	528	520	58	5.67	0.75	2.26	99.25	97.74	566	14	26	40	526	4	6	522	520	60	7.07	0.76	1.14	99.24	98.86	578	1058	8	18	1050	1040	59	0.76
NMW2237	POWNA3039-12	JN891685	Herbarium	Asterales	Asteraceae	Pilosella	Pilosella_officinarum	1972	rbcL	rbcLa-F	rbcLr590	570	30	6	36	534	4	6	530	528	60	6.32	0.75	1.12	99.25	98.88	571	0	29	29	542	4	11	538	531	59	5.08	0.74	2.03	99.26	97.97	590	1076	8	17	1068	1059	59	0.74
NMW2239	POWNA3034-12	JN893611	Herbarium	Asterales	Asteraceae	Pilosella	Pilosella_peleteriana	2001	rbcL	rbcLa-F	rbcLr590	563	27	11	38	525	4	7	521	518	59	6.75	0.76	1.33	99.24	98.67	571	14	30	44	527	4	7	523	520	60	7.71	0.76	1.33	99.24	98.67	570	1052	8	14	1044	1038	60	0.76
NMW628	POWNA537-10	JN890666	Herbarium	Asterales	Asteraceae	Pilosella	Pilosella_peleteriana	2002	rbcL	rbcLa-F	rbcLr590	555	28	6	34	521	6	28	515	493	47	6.13	1.15	5.37	98.85	94.63	559	15	25	40	519	4	10	515	509	52	7.16	0.77	1.93	99.23	98.07	565	1040	10	38	1030	1002	49	0.96
NMW2240	POWNA2984-12	JN893548	Herbarium	Asterales	Asteraceae	Pilosella	Pilosella_peleteriana	1960	rbcL	rbcLa-F	rbcLr590	568	31	8	39	529	4	4	525	525	60	6.87	0.76	0.76	99.24	99.24	569	3	30	33	536	4	8	532	528	59	5.8	0.75	1.49	99.25	98.51	582	1065	8	12	1057	1053	60	0.75
NMW5202	POWNB235-10	JN892485	Fresh	Asterales	Asteraceae	Pulicaria	Pulicaria_dysenterica	2010	rbcL	rbcLa-F	rbcLa-R	575	26	16	42	533	4	9	529	524	59	7.3	0.75	1.69	99.25	98.31	574	14	26	40	534	4	7	530	527	59	6.97	0.75	1.31	99.25	98.69	575	1067	8	16	1059	1051	59	0.75
NMW2243	POWNA1567-12	JN891494	Herbarium	Asterales	Asteraceae	Pulicaria	Pulicaria_dysenterica	1995	rbcL	rbcLa-F	rbcLr590	568	31	5	36	532	4	6	528	526	60	6.34	0.75	1.13	99.25	98.87	572	1	33	34	538	4	9	534	529	59	5.94	0.74	1.67	99.26	98.33	588	1070	8	15	1062	1055	59	0.75
NMW852	POWNA920-10	JN892794	Herbarium	Asterales	Asteraceae	Scorzonera	Scorzonera_humilis	1962	rbcL	rbcLa-F	rbcLr590	833	122	278	400	433	4	7	429	426	54	48.02	0.92	1.62	99.08	98.38	573	12	69	81	492	10	56	482	436	46	14.14	2.03	11.38	97.97	88.62	573	925	14	63	911	862	49	1.51
NMW2250	POWNA2783-12	JN893262	Herbarium	Asterales	Asteraceae	Senecio	Senecio_aquaticus	2002	rbcL	rbcLa-F	rbcLr590	573	32	7	39	534	4	8	530	526	59	6.81	0.75	1.5	99.25	98.5	576	12	31	43	533	4	9	529	524	59	7.47	0.75	1.69	99.25	98.31	582	1067	8	17	1059	1050	59	0.75
NMW2251	POWNA2792-12	JN893271	Herbarium	Asterales	Asteraceae	Senecio	Senecio_aquaticus	2006	rbcL	rbcLa-F	rbcLr590	545	22	4	26	519	18	32	501	487	55	4.77	3.47	6.17	96.53	93.83	568	13	26	39	529	4	11	525	518	59	6.87	0.76	2.08	99.24	97.92	562	1048	22	43	1026	1005	57	2.1
NMW2253	POWNA1694-12	JN891718	Herbarium	Asterales	Asteraceae	Senecio	Senecio_cambrensis	2004	rbcL	rbcLa-F	rbcLr590	567	28	16	44	523	4	6	519	517	59	7.76	0.76	1.15	99.24	98.85	571	11	29	40	531	4	14	527	517	59	7.01	0.75	2.64	99.25	97.36	569	1054	8	20	1046	1034	59	0.76
NMW841	POWNA879-10	JN892981	Herbarium	Asterales	Asteraceae	Senecio	Senecio_erucifolius	1985	rbcL	rbcLa-F	rbcLr506	482	42	12	54	428	18	29	410	399	55	11.2	4.21	6.78	95.79	93.22	486	15	49	64	422	10	18	412	404	55	13.17	2.37	4.27	97.63	95.73	486	850	28	47	822	803	55	3.29
NMW5194	POWNB081-10	JN892024	Fresh	Asterales	Asteraceae	Senecio	Senecio_erucifolius	2010	rbcL	rbcLa-F	rbcLr590	566	27	14	41	525	4	8	521	517	59	7.24	0.76	1.52	99.24	98.48	570	17	30	47	523	4	9	519	514	59	8.25	0.76	1.72	99.24	98.28	567	1048	8	17	1040	1031	59	0.76
NMW2257	POWNA1698-12	JN891722	Herbarium	Asterales	Asteraceae	Senecio	Senecio_erucifolius	2004	rbcL	rbcLa-F	rbcLr590	569	31	14	45	524	4	17	520	507	54	7.91	0.76	3.24	99.24	96.76	571	11	30	41	530	4	12	526	518	59	7.18	0.75	2.26	99.25	97.74	570	1054	8	29	1046	1025	57	0.76
NMW2256	POWNA1697-12	JN891721	Herbarium	Asterales	Asteraceae	Senecio	Senecio_erucifolius	1977	rbcL	rbcLa-F	rbcLr590	566	29	13	42	524	9	20	515	504	52	7.42	1.72	3.82	98.28	96.18	568	10	30	40	528	4	11	524	517	59	7.04	0.76	2.08	99.24	97.92	571	1052	13	31	1039	1021	56	1.24
NMW1010	POWNA673-10	JN891061	Herbarium	Asterales	Asteraceae	Senecio	Senecio_jacobaea	1982	rbcL	rbcLa-F	rbcLr590	641	27	95	122	519	6	54	513	465	42	19.03	1.16	10.4	98.84	89.6	647	100	29	129	518	7	75	511	443	44	19.94	1.35	14.48	98.65	85.52	563	1037	13	129	1024	908	43	1.25
NMW2259	POWNA1689-12	JN891713	Herbarium	Asterales	Asteraceae	Senecio	Senecio_jacobaea	1962	rbcL	rbcLa-F	rbcLr590	570	32	13	45	525	8	25	517	500	50	7.89	1.52	4.76	98.48	95.24	576	15	32	47	529	4	10	525	519	59	8.16	0.76	1.89	99.24	98.11	571	1054	12	35	1042	1019	55	1.14
NMW6188	POWNA2138-12	JN892338	Fresh	Asterales	Asteraceae	Senecio	Senecio_jacobaea	2011	rbcL	rbcLa-F	rbcLr590	566	29	8	37	529	4	6	525	523	59	6.54	0.76	1.13	99.24	98.87	566	6	27	33	533	4	7	529	526	59	5.83	0.75	1.31	99.25	98.69	580	1062	8	13	1054	1049	59	0.75
NMW2262	POWNA1215-12	JN890971	Herbarium	Asterales	Asteraceae	Senecio	Senecio_sylvaticus	1983	rbcL	rbcLa-F	rbcLa-R	589	60	0	60	529	6	14	523	515	53	10.19	1.13	2.65	98.87	97.35	582	130	81	211	371	31	86	340	285	37	36.25	8.36	23.18	91.64	76.82	529	900	37	100	863	800	47	4.11
NMW840	POWNA880-10	JN892979	Herbarium	Asterales	Asteraceae	Senecio	Senecio_sylvaticus	1998	rbcL	rbcLa-F	rbcLr506	471	31	15	46	425	6	12	419	413	57	9.77	1.41	2.82	98.59	97.18	473	16	22	38	435	8	14	427	421	57	8.03	1.84	3.22	98.16	96.78	484	860	14	26	846	834	57	1.63
NMW2263	POWNA3116-12	JN893498	Herbarium	Asterales	Asteraceae	Senecio	Senecio_vulgaris	1972	rbcL	rbcLa-F	rbcLr590	572	73	40	113	459	69	161	390	298	33	19.76	15.03	35.08	84.97	64.92	580	5	79	84	496	4	4	492	492	59	14.48	0.81	0.81	99.19	99.19	550	955	73	165	882	790	47	7.64
NBGW6021	POWNB148-10	JN892571	Fresh	Asterales	Asteraceae	Senecio	Senecio_vulgaris	2010	rbcL	rbcLa-F	rbcLr590	569	28	12	40	529	4	11	525	518	59	7.03	0.76	2.08	99.24	97.92	571	14	36	50	521	4	4	517	517	59	8.76	0.77	0.77	99.23	99.23	570	1050	8	15	1042	1035	59	0.76
NMW2265	POWNA1216-12	JN890972	Herbarium	Asterales	Asteraceae	Senecio	Senecio_vulgaris	1988	rbcL	rbcLa-F	rbcLr590	570	31	6	37	533	4	7	529	526	60	6.49	0.75	1.31	99.25	98.69	569	11	28	39	530	4	12	526	518	60	6.85	0.75	2.26	99.25	97.74	579	1063	8	19	1055	1044	60	0.75
NMW6161	POWNA1189-12	JN890944	Fresh	Asterales	Asteraceae	Senecio	Senecio_vulgaris	2011	rbcL	rbcLa-F	rbcLr590	564	28	7	35	529	4	6	525	523	59	6.21	0.76	1.13	99.24	98.87	568	10	28	38	530	4	9	526	521	59	6.69	0.75	1.7	99.25	98.3	574	1059	8	15	1051	1044	59	0.76
NMW2268	POWNA2795-12	JN893275	Herbarium	Asterales	Asteraceae	Serratula	Serratula_tinctoria	1993	rbcL	rbcLa-F	rbcLr590	569	28	14	42	527	11	23	516	504	54	7.38	2.09	4.36	97.91	95.64	568	12	30	42	526	4	7	522	519	60	7.39	0.76	1.33	99.24	98.67	568	1053	15	30	1038	1023	57	1.42
NMW2269	POWNA2794-12	JN893273	Herbarium	Asterales	Asteraceae	Serratula	Serratula_tinctoria	2006	rbcL	rbcLa-F	rbcLr590	571	32	6	38	533	4	6	529	527	60	6.65	0.75	1.13	99.25	98.87	569	11	29	40	529	4	9	525	520	60	7.03	0.76	1.7	99.24	98.3	579	1062	8	15	1054	1047	60	0.75
NMW837	POWNA674-10	JN891399	Herbarium	Asterales	Asteraceae	Serratula	Serratula_tinctoria	1988	rbcL	rbcLa-F	rbcLr590	562	26	15	41	521	5	18	516	503	48	7.3	0.96	3.45	99.04	96.55	559	16	23	39	520	4	9	516	511	55	6.98	0.77	1.73	99.23	98.27	563	1041	9	27	1032	1014	52	0.86
NMW714	POWNA686-10	JN892986	Herbarium	Asterales	Asteraceae	Silybum	Silybum_marianum	1996	rbcL	rbcLa-F	rbcLr590	563	51	13	64	499	5	17	494	482	46	11.37	1	3.41	99	96.59	573	11	80	91	482	4	8	478	474	54	15.88	0.83	1.66	99.17	98.34	571	981	9	25	972	956	50	0.92
NMW2271	POWNA1394-12	JN891240	Herbarium	Asterales	Asteraceae	Silybum	Silybum_marianum	1933	rbcL	rbcLa-F	rbcLr590	568	29	11	40	528	4	5	524	523	59	7.04	0.76	0.95	99.24	99.05	571	16	29	45	526	4	8	522	518	60	7.88	0.76	1.52	99.24	98.48	572	1054	8	13	1046	1041	60	0.76
NMW705	POWNA694-10	JN893248	Herbarium	Asterales	Asteraceae	Solidago	Solidago_virgaurea	1969	rbcL	rbcLa-F	rbcLr590	565	28	15	43	522	5	16	517	506	51	7.61	0.96	3.07	99.04	96.93	819	272	27	299	520	4	10	516	510	58	36.51	0.77	1.92	99.23	98.08	564	1042	9	26	1033	1016	54	0.86
NMW5311a	POWNB110-10	JN892126	Fresh	Asterales	Asteraceae	Solidago	Solidago_virgaurea	2010	rbcL	rbcLa-F	rbcLr590	569	31	35	66	503	6	20	497	483	49	11.6	1.19	3.98	98.81	96.02	574	13	34	47	527	5	14	522	513	54	8.19	0.95	2.66	99.05	97.34	554	1030	11	34	1019	996	52	1.07
NMW2273	POWNA1396-12	JN891242	Herbarium	Asterales	Asteraceae	Solidago	Solidago_virgaurea	1991	rbcL	rbcLa-F	rbcLr590	568	30	9	39	529	9	23	520	506	49	6.87	1.7	4.35	98.3	95.65	566	11	27	38	528	4	10	524	518	59	6.71	0.76	1.89	99.24	98.11	572	1057	13	33	1044	1024	54	1.23
NMW2272	POWNA1395-12	JN891241	Herbarium	Asterales	Asteraceae	Solidago	Solidago_virgaurea	1996	rbcL	rbcLa-F	rbcLr590	569	30	16	46	523	5	10	518	513	55	8.08	0.96	1.91	99.04	98.09	571	1	34	35	536	4	11	532	525	58	6.13	0.75	2.05	99.25	97.95	579	1059	9	21	1050	1038	56	0.85
NMW706	POWNA695-10	JN893247	Herbarium	Asterales	Asteraceae	Sonchus	Sonchus_arvensis	1979	rbcL	rbcLa-F	rbcLr590	756	31	205	236	520	4	17	516	503	51	31.22	0.77	3.27	99.23	96.73	564	13	28	41	523	4	7	519	516	58	7.27	0.76	1.34	99.24	98.66	568	1043	8	24	1035	1019	54	0.77
NMW2276	POWNA1398-12	JN891244	Herbarium	Asterales	Asteraceae	Sonchus	Sonchus_arvensis	2002	rbcL	rbcLa-F	rbcLr590	564	26	14	40	524	4	10	520	514	59	7.09	0.76	1.91	99.24	98.09	570	13	28	41	529	4	8	525	521	60	7.19	0.76	1.51	99.24	98.49	568	1053	8	18	1045	1035	60	0.76
NMW2275	POWNA1397-12	JN891243	Herbarium	Asterales	Asteraceae	Sonchus	Sonchus_arvensis	1968	rbcL	rbcLa-F	rbcLr590	568	29	7	36	532	4	8	528	524	60	6.34	0.75	1.5	99.25	98.5	565	12	24	36	529	4	10	525	519	59	6.37	0.76	1.89	99.24	98.11	576	1061	8	18	1053	1043	60	0.75
NMW2277	POWNA1399-12	JN891245	Herbarium	Asterales	Asteraceae	Sonchus	Sonchus_asper	1980	rbcL	rbcLa-F	rbcLr590	567	36	3	39	528	4	6	524	522	57	6.88	0.76	1.14	99.24	98.86	570	13	39	52	518	4	4	514	514	60	9.12	0.77	0.77	99.23	99.23	577	1046	8	10	1038	1036	59	0.76
NMW2278	POWNA1400-12	JN891246	Herbarium	Asterales	Asteraceae	Sonchus	Sonchus_asper	1987	rbcL	rbcLa-F	rbcLr590	567	28	7	35	532	4	6	528	526	60	6.17	0.75	1.13	99.25	98.87	567	11	28	39	528	4	9	524	519	60	6.88	0.76	1.7	99.24	98.3	577	1060	8	15	1052	1045	60	0.75
NBGW2016	POWNA696-10	JN893038	Fresh	Asterales	Asteraceae	Sonchus	Sonchus_asper	2008	rbcL	rbcLa-F	rbcLr590	556	31	17	48	508	12	15	496	493	57	8.63	2.36	2.95	97.64	97.05	562	13	15	28	534	9	21	525	513	58	4.98	1.69	3.93	98.31	96.07	569	1042	21	36	1021	1006	57	2.02
NMW6200	POWNA2986-12	JN892071	Fresh	Asterales	Asteraceae	Sonchus	Sonchus_asper	2011	rbcL	rbcLa-F	rbcLr590	567	31	0	31	536	3	6	533	530	57	5.47	0.56	1.12	99.44	98.88	564	3	24	27	537	4	12	533	525	59	4.79	0.74	2.23	99.26	97.77	589	1073	7	18	1066	1055	58	0.65
NBGW2020	POWNA697-10	JN893306	Fresh	Asterales	Asteraceae	Sonchus	Sonchus_oleraceus	2008	rbcL	rbcLa-F	rbcLr590	563	103	18	121	442	10	29	432	413	56	21.49	2.26	6.56	97.74	93.44	570	18	45	63	507	7	16	500	491	58	11.05	1.38	3.16	98.62	96.84	567	949	17	45	932	904	57	1.79
NMW2280	POWNA1861-12	JN891956	Herbarium	Asterales	Asteraceae	Sonchus	Sonchus_oleraceus	1982	rbcL	rbcLa-F	rbcLr590	570	32	5	37	533	4	9	529	524	60	6.49	0.75	1.69	99.25	98.31	573	14	31	45	528	4	7	524	521	60	7.85	0.76	1.33	99.24	98.67	579	1061	8	16	1053	1045	60	0.75
NMW2279	POWNA1483-12	JN891370	Herbarium	Asterales	Asteraceae	Sonchus	Sonchus_oleraceus	1987	rbcL	rbcLa-F	rbcLr590	563	26	11	37	526	4	9	522	517	59	6.57	0.76	1.71	99.24	98.29	570	2	34	36	534	4	9	530	525	59	6.32	0.75	1.69	99.25	98.31	585	1060	8	18	1052	1042	59	0.75
NMW6141	POWNA1512-12	JN891432	Fresh	Asterales	Asteraceae	Sonchus	Sonchus_oleraceus	2011	rbcL	rbcLa-F	rbcLr590	562	26	3	29	533	4	8	529	525	59	5.16	0.75	1.5	99.25	98.5	566	3	27	30	536	4	12	532	524	59	5.3	0.75	2.24	99.25	97.76	585	1069	8	20	1061	1049	59	0.75
NMW998	POWNA743-10	JN892559	Herbarium	Asterales	Asteraceae	Tanacetum	Tanacetum_parthenium	1995	rbcL	rbcLa-F	rbcLr590	641	26	92	118	523	6	24	517	499	46	18.41	1.15	4.59	98.85	95.41	648	102	25	127	521	5	14	516	507	55	19.6	0.96	2.69	99.04	97.31	567	1044	11	38	1033	1006	51	1.05
NMW2282	POWNA1863-12	JN891958	Herbarium	Asterales	Asteraceae	Tanacetum	Tanacetum_parthenium	1992	rbcL	rbcLa-F	rbcLr590	570	34	4	38	532	4	7	528	525	60	6.67	0.75	1.32	99.25	98.68	573	12	37	49	524	4	6	520	518	60	8.55	0.76	1.15	99.24	98.85	578	1056	8	13	1048	1043	60	0.76
NMW997	POWNA744-10	JN892564	Herbarium	Asterales	Asteraceae	Tanacetum	Tanacetum_vulgare	1970	rbcL	rbcLa-F	rbcLr590	644	98	83	181	463	8	41	455	422	45	28.11	1.73	8.86	98.27	91.14	683	135	138	273	410	12	62	398	348	37	39.97	2.93	15.12	97.07	84.88	576	873	20	103	853	770	41	2.29
NMW2284	POWNA1865-12	JN891960	Herbarium	Asterales	Asteraceae	Tanacetum	Tanacetum_vulgare	1951	rbcL	rbcLa-F	rbcLr590	565	29	30	59	506	47	125	459	381	37	10.44	9.29	24.7	90.71	75.3	571	13	37	50	521	4	12	517	509	59	8.76	0.77	2.3	99.23	97.7	550	1027	51	137	976	890	48	4.97
NMW2283	POWNA1862-12	JN891957	Herbarium	Asterales	Asteraceae	Tanacetum	Tanacetum_vulgare	1993	rbcL	rbcLa-F	rbcLr590	578	33	7	40	538	4	10	534	528	59	6.92	0.74	1.86	99.26	98.14	572	11	28	39	533	4	10	529	523	60	6.82	0.75	1.88	99.25	98.12	581	1071	8	20	1063	1051	59	0.75
NMW2285	POWNA2115-12	JN892022	Herbarium	Asterales	Asteraceae	Taraxacum	Taraxacum_agg	1983	rbcL	rbcLa-F	rbcLr590	568	29	5	34	534	4	8	530	526	60	5.99	0.75	1.5	99.25	98.5	572	12	31	43	529	4	6	525	523	60	7.52	0.76	1.13	99.24	98.87	581	1063	8	14	1055	1049	60	0.75
NBGW7001	POWNB175-10	JN893239	Fresh	Asterales	Asteraceae	Taraxacum	Taraxacum_agg	2010	rbcL	rbcLa-F	rbcLr590	566	29	13	42	524	4	7	520	517	58	7.42	0.76	1.34	99.24	98.66	568	12	30	42	526	4	12	522	514	59	7.39	0.76	2.28	99.24	97.72	569	1050	8	19	1042	1031	58	0.76
NMW2286	POWNA1867-12	JN891393	Herbarium	Asterales	Asteraceae	Taraxacum	Taraxacum_agg	1988	rbcL	rbcLa-F	rbcLr590	564	21	17	38	526	12	48	514	478	47	6.74	2.28	9.13	97.72	90.87	567	12	29	41	526	4	6	522	520	60	7.23	0.76	1.14	99.24	98.86	566	1052	16	54	1036	998	53	1.52
NBGW7255	POWNA1805-12	JN891879	Fresh	Asterales	Asteraceae	Taraxacum	Taraxacum_agg	2011	rbcL	rbcLa-F	rbcLr590	568	21	8	29	539	4	11	535	528	58	5.11	0.74	2.04	99.26	97.96	568	11	28	39	529	4	15	525	514	59	6.87	0.76	2.84	99.24	97.16	573	1068	8	26	1060	1042	59	0.75
NMW5312a	POWNA1916-12	JN892028	Fresh	Asterales	Asteraceae	Taraxacum	Taraxacum_agg	2010	rbcL	rbcLa-F	rbcLr590	683	45	127	172	511	4	6	507	505	58	25.18	0.78	1.17	99.22	98.83	564	15	17	32	532	4	9	528	523	59	5.67	0.75	1.69	99.25	98.31	571	1043	8	15	1035	1028	59	0.77
NMW974	POWNA758-10	JN890681	Herbarium	Asterales	Asteraceae	Tragopogon	Tragopogon_pratensis	1989	rbcL	rbcLa-F	rbcLr590	623	29	74	103	520	4	24	516	496	46	16.53	0.77	4.62	99.23	95.38	644	96	24	120	524	4	15	520	509	53	18.63	0.76	2.86	99.24	97.14	568	1044	8	39	1036	1005	50	0.77
NMW2292	POWNA2047-12	JN891865	Herbarium	Asterales	Asteraceae	Tragopogon	Tragopogon_pratensis	1987	rbcL	rbcLa-F	rbcLr590	562	24	11	35	527	10	36	517	491	50	6.23	1.9	6.83	98.1	93.17	566	10	24	34	532	4	9	528	523	59	6.01	0.75	1.69	99.25	98.31	573	1059	14	45	1045	1014	55	1.32
NMW2291	POWNA2050-12	JN891882	Herbarium	Asterales	Asteraceae	Tragopogon	Tragopogon_pratensis	1993	rbcL	rbcLa-F	rbcLr590	570	31	10	41	529	9	11	520	518	59	7.19	1.7	2.08	98.3	97.92	569	1	30	31	538	4	7	534	531	60	5.45	0.74	1.3	99.26	98.7	585	1067	13	18	1054	1049	60	1.22
NMW989	POWNA774-10	JN892770	Herbarium	Asterales	Asteraceae	Tripleurospermum	Tripleurospermum_inodorum	1993	rbcL	rbcLa-F	rbcLr590	564	27	15	42	522	4	36	518	486	45	7.45	0.77	6.9	99.23	93.1	564	17	27	44	520	4	13	516	507	52	7.8	0.77	2.5	99.23	97.5	566	1042	8	49	1034	993	49	0.77
NMW2295	POWNA2046-12	JN891846	Herbarium	Asterales	Asteraceae	Tripleurospermum	Tripleurospermum_inodorum	1987	rbcL	rbcLa-F	rbcLa-R	573	25	14	39	534	4	10	530	524	58	6.81	0.75	1.87	99.25	98.13	576	14	25	39	537	4	9	533	528	59	6.77	0.74	1.68	99.26	98.32	579	1071	8	19	1063	1052	59	0.75
NMW990	POWNA775-10	JN892563	Herbarium	Asterales	Asteraceae	Tripleurospermum	Tripleurospermum_maritimum	2002	rbcL	rbcLa-F	rbcLr590	680	26	80	106	574	22	59	552	515	45	15.59	3.83	10.28	96.17	89.72	724	176	63	239	485	6	57	479	428	39	33.01	1.24	11.75	98.76	88.25	622	1059	28	116	1031	943	43	2.64
NMW2294	POWNA3101-12	JN892195	Herbarium	Asterales	Asteraceae	Tripleurospermum	Tripleurospermum_maritimum	1956	rbcL	rbcLa-F	rbcLa-R	584	51	48	99	485	47	107	438	378	46	16.95	9.69	22.06	90.31	77.94	581	11	72	83	498	39	85	459	413	49	14.29	7.83	17.07	92.17	82.93	550	983	86	192	897	791	48	8.75
NMW951	POWNA778-10	JN893522	Herbarium	Asterales	Asteraceae	Tussilago	Tussilago_farfara	1967	rbcL	rbcLa-F	rbcLr590	646	30	96	126	520	5	28	515	492	46	19.5	0.96	5.38	99.04	94.62	637	85	27	112	525	4	20	521	505	53	17.58	0.76	3.81	99.24	96.19	571	1045	9	48	1036	997	50	0.86
NBGW7207	POWNA1326-12	JN891146	Fresh	Asterales	Asteraceae	Tussilago	Tussilago_farfara	2011	rbcL	rbcLa-F	rbcLr590	565	27	7	34	531	4	8	527	523	59	6.02	0.75	1.51	99.25	98.49	569	12	27	39	530	4	7	526	523	60	6.85	0.75	1.32	99.25	98.68	575	1061	8	15	1053	1046	59	0.75
NMW2297	POWNA2525-12	JN892889	Herbarium	Asterales	Asteraceae	Tussilago	Tussilago_farfara	1967	rbcL	rbcLa-F	rbcLr590	576	38	7	45	531	4	7	527	524	60	7.81	0.75	1.32	99.25	98.68	575	5	34	39	536	4	9	532	527	59	6.78	0.75	1.68	99.25	98.32	587	1067	8	16	1059	1051	60	0.75
NBGW7213	POWNA1165-12	JN892762	Fresh	Asterales	Asteraceae	Tussilago	Tussilago_farfara	2011	rbcL	rbcLa-F	rbcLr590	563	28	3	31	532	4	8	528	524	58	5.51	0.75	1.5	99.25	98.5	568	11	26	37	531	4	7	527	524	60	6.51	0.75	1.32	99.25	98.68	579	1063	8	15	1055	1048	59	0.75
NMW6230	POWNA2833-12	JN890692	Fresh	Asterales	Asteraceae	Tussilago	Tussilago_farfara	2011	rbcL	rbcLa-F	rbcLr590	562	26	8	34	528	4	4	524	524	59	6.05	0.76	0.76	99.24	99.24	568	9	25	34	534	4	10	530	524	59	5.99	0.75	1.87	99.25	98.13	577	1062	8	14	1054	1048	59	0.75
NMW121	POWNA096-10	JN891483	Herbarium	Asterales	Campanulaceae	Campanula	Campanula_glomerata	1982	rbcL	rbcLa-F	rbcLr590	624	23	81	104	520	13	66	507	454	43	16.67	2.5	12.69	97.5	87.31	679	135	18	153	526	5	17	521	509	52	22.53	0.95	3.23	99.05	96.77	564	1046	18	83	1028	963	47	1.72
NMW2317	POWNA2856-12	JN893355	Herbarium	Asterales	Campanulaceae	Campanula	Campanula_glomerata	1934	rbcL	rbcLa-F	rbcLr590	570	37	13	50	520	10	33	510	487	50	8.77	1.92	6.35	98.08	93.65	570	14	31	45	525	4	6	521	519	59	7.89	0.76	1.14	99.24	98.86	570	1045	14	39	1031	1006	55	1.34
NMW122	POWNA097-10	JN891482	Herbarium	Asterales	Campanulaceae	Campanula	Campanula_latifolia	1991	rbcL	rbcLa-F	rbcLr590	621	23	75	98	523	8	29	515	494	45	15.78	1.53	5.54	98.47	94.46	625	73	20	93	532	4	30	528	502	51	14.88	0.75	5.64	99.25	94.36	570	1055	12	59	1043	996	48	1.14
NMW2318	POWNA2860-12	JN893359	Herbarium	Asterales	Campanulaceae	Campanula	Campanula_latifolia	1951	rbcL	rbcLa-F	rbcLr590	564	26	18	44	520	4	6	516	514	60	7.8	0.77	1.15	99.23	98.85	568	9	26	35	533	4	8	529	525	59	6.16	0.75	1.5	99.25	98.5	569	1053	8	14	1045	1039	59	0.76
NMW2319	POWNA2859-12	JN893358	Herbarium	Asterales	Campanulaceae	Campanula	Campanula_latifolia	1951	rbcL	rbcLa-F	rbcLr590	569	29	5	34	535	4	8	531	527	60	5.98	0.75	1.5	99.25	98.5	568	11	20	31	537	4	16	533	521	59	5.46	0.74	2.98	99.26	97.02	580	1072	8	24	1064	1048	60	0.75
NBGW7173	POWNB189-10	JN893005	Fresh	Asterales	Campanulaceae	Campanula	Campanula_patula	2008	rbcL	rbcLa-F	rbcLr590	570	36	11	47	523	12	50	511	473	45	8.25	2.29	9.56	97.71	90.44	572	22	172	194	378	44	142	334	236	33	33.92	11.64	37.57	88.36	62.43	560	901	56	192	845	709	40	6.22
NMW123	POWNA098-10	JN891481	Herbarium	Asterales	Campanulaceae	Campanula	Campanula_patula	1994	rbcL	rbcLa-F	rbcLr590	780	36	234	270	510	6	21	504	489	48	34.62	1.18	4.12	98.82	95.88	649	93	39	132	517	4	9	513	508	58	20.34	0.77	1.74	99.23	98.26	568	1027	10	30	1017	997	53	0.97
NMW2321	POWNA1731-12	JN891766	Herbarium	Asterales	Campanulaceae	Campanula	Campanula_patula	1958	rbcL	rbcLa-F	rbcLr590	566	24	17	41	525	4	10	521	515	56	7.24	0.76	1.9	99.24	98.1	638	81	30	111	527	4	6	523	521	59	17.4	0.76	1.14	99.24	98.86	569	1052	8	16	1044	1036	57	0.76
NBGW7170	POWNB186-10	JN893008	Fresh	Asterales	Campanulaceae	Campanula	Campanula_patula	2008	rbcL	rbcLa-F	rbcLr590	565	35	35	70	495	64	218	431	277	30	12.39	12.93	44.04	87.07	55.96	570	34	30	64	506	23	94	483	412	39	11.23	4.55	18.58	95.45	81.42	527	1001	87	312	914	689	34	8.69
NBGW7166	POWNB183-10	JN892765	Fresh	Asterales	Campanulaceae	Campanula	Campanula_patula	2008	rbcL	rbcLa-F	rbcLr590	563	27	10	37	526	4	9	522	517	59	6.57	0.76	1.71	99.24	98.29	576	11	37	48	528	4	11	524	517	58	8.33	0.76	2.08	99.24	97.92	572	1054	8	20	1046	1034	58	0.76
NBGW7171	POWNB187-10	JN893007	Fresh	Asterales	Campanulaceae	Campanula	Campanula_patula	2008	rbcL	rbcLa-F	rbcLr590	564	30	9	39	525	8	31	517	494	48	6.91	1.52	5.9	98.48	94.1	567	8	35	43	524	9	31	515	493	47	7.58	1.72	5.92	98.28	94.08	574	1049	17	62	1032	987	47	1.62
NBGW7172	POWNB188-10	JN893006	Fresh	Asterales	Campanulaceae	Campanula	Campanula_patula	2008	rbcL	rbcLa-F	rbcLr590	565	28	48	76	489	14	78	475	411	40	13.45	2.86	15.95	97.14	84.05	565	7	32	39	526	7	36	519	490	45	6.9	1.33	6.84	98.67	93.16	538	1015	21	114	994	901	42	2.07
NBGW7167	POWNB184-10	JN892766	Fresh	Asterales	Campanulaceae	Campanula	Campanula_patula	2008	rbcL	rbcLa-F	rbcLr590	568	32	14	46	522	4	6	518	516	58	8.1	0.77	1.15	99.23	98.85	567	11	27	38	529	8	21	521	508	48	6.7	1.51	3.97	98.49	96.03	570	1051	12	27	1039	1024	53	1.14
NBGW7168	POWNB185-10	JN892767	Fresh	Asterales	Campanulaceae	Campanula	Campanula_patula	2008	rbcL	rbcLa-F	rbcLr590	566	29	15	44	522	15	75	507	447	40	7.77	2.87	14.37	97.13	85.63	566	9	27	36	530	6	44	524	486	45	6.36	1.13	8.3	98.87	91.7	573	1052	21	119	1031	933	43	2
NMW2324	POWNA1041-12	JN890722	Herbarium	Asterales	Campanulaceae	Campanula	Campanula_rapunculus	1951	rbcL	rbcLa-F	rbcLr590	563	26	14	40	523	4	9	519	514	55	7.1	0.76	1.72	99.24	98.28	637	80	28	108	529	4	6	525	523	59	16.95	0.76	1.13	99.24	98.87	570	1052	8	15	1044	1037	57	0.76
NMW124	POWNA099-10	JN891486	Herbarium	Asterales	Campanulaceae	Campanula	Campanula_rapunculus	1969	rbcL	rbcLa-F	rbcLr590	624	47	72	119	505	8	54	497	451	41	19.07	1.58	10.69	98.42	89.31	617	65	35	100	517	4	20	513	497	50	16.21	0.77	3.87	99.23	96.13	573	1022	12	74	1010	948	46	1.17
NMW2328	POWNA1033-12	JN890714	Herbarium	Asterales	Campanulaceae	Campanula	Campanula_rotundifolia	1993	rbcL	rbcLa-F	rbcLr590	566	25	31	56	510	5	11	505	499	54	9.89	0.98	2.16	99.02	97.84	571	14	30	44	527	4	6	523	521	59	7.71	0.76	1.14	99.24	98.86	553	1037	9	17	1028	1020	57	0.87
NMW2326	POWNA1039-12	JN890720	Herbarium	Asterales	Campanulaceae	Campanula	Campanula_rotundifolia	2002	rbcL	rbcLa-F	rbcLr590	566	28	16	44	522	5	10	517	512	55	7.77	0.96	1.92	99.04	98.08	572	14	29	43	529	4	7	525	522	60	7.52	0.76	1.32	99.24	98.68	566	1051	9	17	1042	1034	57	0.86
NMW2327	POWNA1040-12	JN890721	Herbarium	Asterales	Campanulaceae	Campanula	Campanula_rotundifolia	1954	rbcL	rbcLa-F	rbcLr590	664	25	106	131	533	4	11	529	522	57	19.73	0.75	2.06	99.25	97.94	566	11	28	39	527	4	10	523	517	60	6.89	0.76	1.9	99.24	98.1	580	1060	8	21	1052	1039	58	0.75
NMW5020	POWNB087-10	JN893422	Fresh	Asterales	Campanulaceae	Campanula	Campanula_rotundifolia	2010	rbcL	rbcLa-F	rbcLr590	563	25	14	39	524	4	10	520	514	59	6.93	0.76	1.91	99.24	98.09	568	11	28	39	529	4	12	525	517	58	6.87	0.76	2.27	99.24	97.73	572	1053	8	22	1045	1031	58	0.76
NMW2325	POWNA1744-12	JN891785	Herbarium	Asterales	Campanulaceae	Campanula	Campanula_rotundifolia	1961	rbcL	rbcLa-F	rbcLr590	669	44	117	161	508	4	4	504	504	57	24.07	0.79	0.79	99.21	99.21	567	15	18	33	534	4	10	530	524	60	5.82	0.75	1.87	99.25	98.13	569	1042	8	14	1034	1028	58	0.77
NMW126	POWNA100-10	JN891485	Herbarium	Asterales	Campanulaceae	Campanula	Campanula_trachelium	1972	rbcL	rbcLa-F	rbcLr590	644	27	99	126	518	6	48	512	470	43	19.57	1.16	9.27	98.84	90.73	640	92	33	125	515	6	21	509	494	50	19.53	1.17	4.08	98.83	95.92	566	1033	12	69	1021	964	47	1.16
NMW2330	POWNA3160-12	JN893653	Herbarium	Asterales	Campanulaceae	Campanula	Campanula_trachelium	1972	rbcL	rbcLa-F	rbcLr590	562	25	17	42	520	4	4	516	516	60	7.47	0.77	0.77	99.23	99.23	570	11	30	41	529	4	7	525	522	59	7.19	0.76	1.32	99.24	98.68	566	1049	8	11	1041	1038	60	0.76
NMW2329	POWNA1034-12	JN890715	Herbarium	Asterales	Campanulaceae	Campanula	Campanula_trachelium	1941	rbcL	rbcLa-F	rbcLr590	568	28	15	43	525	4	4	521	521	60	7.57	0.76	0.76	99.24	99.24	568	10	29	39	529	4	8	525	521	60	6.87	0.76	1.51	99.24	98.49	572	1054	8	12	1046	1042	60	0.76
NMW423	POWNA379-10	JN892535	Herbarium	Asterales	Campanulaceae	Jasione	Jasione_montana	1988	rbcL	rbcLa-F	rbcLr590	619	29	69	98	521	7	51	514	470	42	15.83	1.34	9.79	98.66	90.21	641	91	35	126	515	6	33	509	482	46	19.66	1.17	6.41	98.83	93.59	567	1036	13	84	1023	952	44	1.25
NMW2331	POWNA3159-12	JN893798	Herbarium	Asterales	Campanulaceae	Jasione	Jasione_montana	1985	rbcL	rbcLa-F	rbcLr590	569	36	4	40	529	4	5	525	524	60	7.03	0.76	0.95	99.24	99.05	575	10	50	60	515	4	6	511	509	54	10.43	0.78	1.17	99.22	98.83	581	1044	8	11	1036	1033	57	0.77
NMW2332	POWNA3161-12	JN893800	Herbarium	Asterales	Campanulaceae	Jasione	Jasione_montana	1992	rbcL	rbcLa-F	rbcLr590	564	26	14	40	524	4	16	520	508	51	7.09	0.76	3.05	99.24	96.95	567	14	20	34	533	4	7	529	526	60	6	0.75	1.31	99.25	98.69	568	1057	8	23	1049	1034	55	0.76
NMW511	POWNA433-10	JN892508	Herbarium	Asterales	Campanulaceae	Lobelia	Lobelia_dortmanna	1993	rbcL	rbcLa-F	rbcLr590	657	36	108	144	513	9	37	504	476	44	21.92	1.75	7.21	98.25	92.79	675	126	68	194	481	13	59	468	422	39	28.74	2.7	12.27	97.3	87.73	567	994	22	96	972	898	42	2.21
NMW2334	POWNA3156-12	JN893795	Herbarium	Asterales	Campanulaceae	Lobelia	Lobelia_dortmanna	1963	rbcL	rbcLa-F	rbcLr590	573	45	5	50	523	4	10	519	513	54	8.73	0.76	1.91	99.24	98.09	574	5	44	49	525	4	8	521	517	58	8.54	0.76	1.52	99.24	98.48	586	1048	8	18	1040	1030	56	0.76
NMW2336	POWNA3158-12	JN893797	Herbarium	Asterales	Campanulaceae	Wahlenbergia	Wahlenbergia_hederacea	1956	rbcL	rbcLa-F	rbcLr590	572	75	21	96	476	8	10	468	466	54	16.78	1.68	2.1	98.32	97.9	573	10	76	86	487	4	6	483	481	60	15.01	0.82	1.23	99.18	98.77	565	963	12	16	951	947	57	1.25
NMW911	POWNA832-10	JN891168	Herbarium	Asterales	Campanulaceae	Wahlenbergia	Wahlenbergia_hederacea	2003	rbcL	rbcLa-F	rbcLr590	563	23	18	41	522	5	23	517	499	47	7.28	0.96	4.41	99.04	95.59	563	18	32	50	513	4	6	509	507	55	8.88	0.78	1.17	99.22	98.83	565	1035	9	29	1026	1006	51	0.87
NMW2335	POWNA3155-12	JN893794	Herbarium	Asterales	Campanulaceae	Wahlenbergia	Wahlenbergia_hederacea	1995	rbcL	rbcLa-F	rbcLr590	570	30	16	46	524	5	10	519	514	53	8.07	0.95	1.91	99.05	98.09	567	12	20	32	535	4	11	531	524	59	5.64	0.75	2.06	99.25	97.94	567	1059	9	21	1050	1038	56	0.85
NMW544	POWNA470-10	JN893659	Herbarium	Asterales	Menyanthaceae	Menyanthes	Menyanthes_trifoliata	2000	rbcL	rbcLa-F	rbcLr590	626	29	78	107	519	10	48	509	471	44	17.09	1.93	9.25	98.07	90.75	621	78	31	109	512	4	11	508	501	53	17.55	0.78	2.15	99.22	97.85	563	1031	14	59	1017	972	48	1.36
NMW2728	POWNA1733-12	JN891767	Herbarium	Asterales	Menyanthaceae	Menyanthes	Menyanthes_trifoliata	1983	rbcL	rbcLa-F	rbcLr590	569	35	4	39	530	4	5	526	525	59	6.85	0.75	0.94	99.25	99.06	570	11	35	46	524	4	12	520	512	59	8.07	0.76	2.29	99.24	97.71	579	1054	8	17	1046	1037	59	0.76
NMW2729	POWNA1734-12	JN891768	Herbarium	Asterales	Menyanthaceae	Menyanthes	Menyanthes_trifoliata	1993	rbcL	rbcLa-F	rbcLr590	566	29	10	39	527	5	16	522	511	56	6.89	0.95	3.04	99.05	96.96	567	13	22	35	532	4	10	528	522	59	6.17	0.75	1.88	99.25	98.12	574	1059	9	26	1050	1033	58	0.85
NMW2430	POWNA3054-12	JN893638	Herbarium	Boraginales	Boraginaceae	Anchusa	Anchusa_arvensis	1968	rbcL	rbcLa-F	rbcLr590	573	72	41	113	460	5	23	455	437	48	19.72	1.09	5	98.91	95	577	4	59	63	514	12	45	502	469	48	10.92	2.33	8.75	97.67	91.25	555	974	17	68	957	906	48	1.75
NMW2428	POWNA2873-12	JN892944	Herbarium	Boraginales	Boraginaceae	Anchusa	Anchusa_arvensis	1981	rbcL	rbcLa-F	rbcLr590	565	25	17	42	523	4	9	519	514	58	7.43	0.76	1.72	99.24	98.28	568	14	30	44	524	4	11	520	513	58	7.75	0.76	2.1	99.24	97.9	565	1047	8	20	1039	1027	58	0.76
NMW2405	POWNA2502-12	JN892865	Herbarium	Boraginales	Boraginaceae	Cynoglossum	Cynoglossum_officinale	1983	rbcL	rbcLa-F	rbcLa-R	578	96	5	101	477	8	37	469	440	45	17.47	1.68	7.76	98.32	92.24	579	8	88	96	483	4	16	479	467	51	16.58	0.83	3.31	99.17	96.69	599	960	12	53	948	907	48	1.25
NMW5183	POWNB057-10	JN892263	Fresh	Boraginales	Boraginaceae	Cynoglossum	Cynoglossum_officinale	2010	rbcL	rbcLa-F	rbcLr590	566	29	10	39	527	4	18	523	509	53	6.89	0.76	3.42	99.24	96.58	567	15	25	40	527	4	12	523	515	58	7.05	0.76	2.28	99.24	97.72	571	1054	8	30	1046	1024	56	0.76
NMW2406	POWNA1536-12	JN892864	Herbarium	Boraginales	Boraginaceae	Echium	Echium_vulgare	1981	rbcL	rbcLa-F	rbcLr590	580	48	7	55	525	4	17	521	508	53	9.48	0.76	3.24	99.24	96.76	575	7	54	61	514	4	6	510	508	59	10.61	0.78	1.17	99.22	98.83	585	1039	8	23	1031	1016	56	0.77
NMW275	POWNA229-10	JN892240	Herbarium	Boraginales	Boraginaceae	Echium	Echium_vulgare	1992	rbcL	rbcLa-F	rbcLr590	562	35	10	45	517	11	19	506	498	57	8.01	2.13	3.68	97.87	96.32	568	12	39	51	517	12	23	505	494	56	8.98	2.32	4.45	97.68	95.55	573	1034	23	42	1011	992	57	2.22
NMW2409	POWNA1522-12	JN892862	Herbarium	Boraginales	Boraginaceae	Lithospermum	Lithospermum_arvense	1941	rbcL	rbcLa-F	rbcLr590	569	31	4	35	534	4	8	530	526	60	6.15	0.75	1.5	99.25	98.5	572	10	39	49	523	4	6	519	517	60	8.57	0.76	1.15	99.24	98.85	579	1057	8	14	1049	1043	60	0.76
NMW507	POWNA430-10	JN892707	Herbarium	Boraginales	Boraginaceae	Lithospermum	Lithospermum_arvense	1962	rbcL	rbcLa-F	rbcLr590	557	26	16	42	515	12	18	503	497	56	7.54	2.33	3.5	97.67	96.5	566	14	32	46	520	15	36	505	484	52	8.13	2.88	6.92	97.12	93.08	568	1035	27	54	1008	981	54	2.61
NMW508	POWNA864-10	JN892706	Herbarium	Boraginales	Boraginaceae	Lithospermum	Lithospermum_officinale	1969	rbcL	rbcLa-F	rbcLr506	744	26	279	305	439	11	67	428	372	44	40.99	2.51	15.26	97.49	84.74	950	490	26	516	434	12	19	422	415	54	54.32	2.76	4.38	97.24	95.62	481	873	23	86	850	787	49	2.63
NMW2411	POWNA2455-12	JN893110	Herbarium	Boraginales	Boraginaceae	Lithospermum	Lithospermum_officinale	1956	rbcL	rbcLa-F	rbcLr590	572	31	7	38	534	4	8	530	526	60	6.64	0.75	1.5	99.25	98.5	566	12	29	41	525	4	4	521	521	60	7.24	0.76	0.76	99.24	99.24	578	1059	8	12	1051	1047	60	0.76
NMW6394	POWNA1355-12	JN891191	Fresh	Boraginales	Boraginaceae	Lithospermum	Lithospermum_officinale	2011	rbcL	rbcLa-F	rbcLr590	562	23	13	36	526	4	14	522	512	57	6.41	0.76	2.66	99.24	97.34	566	13	27	40	526	4	8	522	518	60	7.07	0.76	1.52	99.24	98.48	567	1052	8	22	1044	1030	58	0.76
NMW6478	POWNA2428-12	JN892759	Fresh	Boraginales	Boraginaceae	Lithospermum	Lithospermum_purpureocaeruleum	2011	rbcL	rbcLa-F	rbcLr590	563	26	12	38	525	4	7	521	518	56	6.75	0.76	1.33	99.24	98.67	569	11	36	47	522	4	9	518	513	59	8.26	0.77	1.72	99.23	98.28	570	1047	8	16	1039	1031	58	0.76
NMW2413	POWNA2456-12	JN892813	Herbarium	Boraginales	Boraginaceae	Lithospermum	Lithospermum_purpureocaeruleum	1944	rbcL	rbcLa-F	rbcLr590	569	32	6	38	531	4	6	527	525	60	6.68	0.75	1.13	99.25	98.87	571	5	37	42	529	4	7	525	522	60	7.36	0.76	1.32	99.24	98.68	583	1060	8	13	1052	1047	60	0.75
NMW509	POWNA431-10	JN892705	Herbarium	Boraginales	Boraginaceae	Lithospermum	Lithospermum_purpureocaeruleum	1969	rbcL	rbcLa-F	rbcLr590	557	19	17	36	521	5	12	516	509	57	6.46	0.96	2.3	99.04	97.7	564	14	26	40	524	5	16	519	508	57	7.09	0.95	3.05	99.05	96.95	569	1045	10	28	1035	1017	57	0.96
NMW2431	POWNA3055-12	JN893639	Herbarium	Boraginales	Boraginaceae	Mertensia	Mertensia_maritima	1980	rbcL	rbcLa-F	rbcLr590	563	24	62	86	477	72	190	405	287	33	15.28	15.09	39.83	84.91	60.17	570	14	35	49	521	5	10	516	511	53	8.6	0.96	1.92	99.04	98.08	521	998	77	200	921	798	43	7.72
NMW546	POWNA473-10	JN893660	Herbarium	Boraginales	Boraginaceae	Mertensia	Mertensia_maritima	1985	rbcL	rbcLa-F	rbcLr590	560	30	12	42	518	12	20	506	498	57	7.5	2.32	3.86	97.68	96.14	560	12	30	42	518	9	19	509	499	57	7.5	1.74	3.67	98.26	96.33	571	1036	21	39	1015	997	57	2.03
NMW558	POWNA482-10	JN893442	Herbarium	Boraginales	Boraginaceae	Myosotis	Myosotis_arvensis	1991	rbcL	rbcLa-F	rbcLr590	566	39	14	53	513	11	15	502	498	57	9.36	2.14	2.92	97.86	97.08	566	13	37	50	516	11	16	505	500	56	8.83	2.13	3.1	97.87	96.9	568	1029	22	31	1007	998	56	2.14
NMW6173	POWNA1035-12	JN890716	Fresh	Boraginales	Boraginaceae	Myosotis	Myosotis_arvensis	2011	rbcL	rbcLa-F	rbcLr590	565	26	1	27	538	4	10	534	528	58	4.78	0.74	1.86	99.26	98.14	569	10	35	45	524	4	6	520	518	60	7.91	0.76	1.15	99.24	98.85	580	1062	8	16	1054	1046	59	0.75
NMW2434	POWNA3052-12	JN893636	Herbarium	Boraginales	Boraginaceae	Myosotis	Myosotis_arvensis	1996	rbcL	rbcLa-F	rbcLr590	569	29	3	32	537	4	11	533	526	59	5.62	0.74	2.05	99.26	97.95	568	8	33	41	527	4	6	523	521	59	7.22	0.76	1.14	99.24	98.86	583	1064	8	17	1056	1047	59	0.75
NMW2414	POWNA2447-12	JN893105	Herbarium	Boraginales	Boraginaceae	Myosotis	Myosotis_discolor	1998	rbcL	rbcLa-F	rbcLr590	572	33	6	39	533	4	6	529	527	60	6.82	0.75	1.13	99.25	98.87	568	7	63	70	498	12	26	486	472	52	12.32	2.41	5.22	97.59	94.78	579	1031	16	32	1015	999	56	1.55
NMW2415	POWNA2448-12	JN893106	Herbarium	Boraginales	Boraginaceae	Myosotis	Myosotis_discolor	1985	rbcL	rbcLa-F	rbcLr590	569	37	11	48	521	39	111	482	410	37	8.44	7.49	21.31	92.51	78.69	575	13	40	53	522	4	5	518	517	59	9.22	0.77	0.96	99.23	99.04	573	1043	43	116	1000	927	48	4.12
NBGW2011	POWNA483-10	JN893040	Fresh	Boraginales	Boraginaceae	Myosotis	Myosotis_discolor	2008	rbcL	rbcLa-F	rbcLr590	555	36	17	53	502	9	12	493	490	58	9.55	1.79	2.39	98.21	97.61	554	16	24	40	514	9	15	505	499	58	7.22	1.75	2.92	98.25	97.08	565	1016	18	27	998	989	58	1.77
NMW894	POWNA484-10	JN890651	Herbarium	Boraginales	Boraginaceae	Myosotis	Myosotis_laxa	1998	rbcL	rbcLa-F	rbcLr590	566	27	14	41	525	10	19	515	506	54	7.24	1.9	3.62	98.1	96.38	560	16	31	47	513	4	12	509	501	55	8.39	0.78	2.34	99.22	97.66	566	1038	14	31	1024	1007	55	1.35
NMW2416	POWNA2449-12	JN893107	Herbarium	Boraginales	Boraginaceae	Myosotis	Myosotis_laxa	1987	rbcL	rbcLa-F	rbcLr590	568	32	1	33	535	4	11	531	524	60	5.81	0.75	2.06	99.25	97.94	575	16	31	47	528	4	7	524	521	60	8.17	0.76	1.33	99.24	98.67	579	1063	8	18	1055	1045	60	0.75
NMW6346	POWNA1154-12	JN890894	Fresh	Boraginales	Boraginaceae	Myosotis	Myosotis_laxa	2011	rbcL	rbcLa-F	rbcLr590	565	27	9	36	529	4	7	525	522	59	6.37	0.76	1.32	99.24	98.68	568	14	26	40	528	4	13	524	515	59	7.04	0.76	2.46	99.24	97.54	573	1057	8	20	1049	1037	59	0.76
NMW2419	POWNA2674-12	JN892779	Herbarium	Boraginales	Boraginaceae	Myosotis	Myosotis_ramosissima	1961	rbcL	rbcLa-F	rbcLr590	577	44	11	55	522	7	25	515	497	48	9.53	1.34	4.79	98.66	95.21	574	12	44	56	518	4	10	514	508	58	9.76	0.77	1.93	99.23	98.07	574	1040	11	35	1029	1005	53	1.06
NMW1005	POWNA485-10	JN891320	Herbarium	Boraginales	Boraginaceae	Myosotis	Myosotis_ramosissima	1991	rbcL	rbcLa-F	rbcLr590	564	24	14	38	526	4	16	522	510	57	6.74	0.76	3.04	99.24	96.96	565	15	27	42	523	4	11	519	512	57	7.43	0.76	2.1	99.24	97.9	569	1049	8	27	1041	1022	57	0.76
NMW2418	POWNA2673-12	JN892774	Herbarium	Boraginales	Boraginaceae	Myosotis	Myosotis_ramosissima	1994	rbcL	rbcLa-F	rbcLr590	574	30	6	36	538	4	8	534	530	60	6.27	0.74	1.49	99.26	98.51	568	11	27	38	530	4	10	526	520	60	6.69	0.75	1.89	99.25	98.11	579	1068	8	18	1060	1050	60	0.75
NMW2420	POWNA2935-12	JN893379	Herbarium	Boraginales	Boraginaceae	Myosotis	Myosotis_scorpioides	1997	rbcL	rbcLa-F	rbcLr590	578	40	22	62	516	5	11	511	505	57	10.73	0.97	2.13	99.03	97.87	573	10	40	50	523	4	6	519	517	60	8.73	0.76	1.15	99.24	98.85	564	1039	9	17	1030	1022	58	0.87
NMW2421	POWNA1167-12	JN893378	Herbarium	Boraginales	Boraginaceae	Myosotis	Myosotis_scorpioides	2003	rbcL	rbcLa-F	rbcLr590	563	26	17	43	520	4	5	516	515	60	7.64	0.77	0.96	99.23	99.04	569	14	31	45	524	4	7	520	517	60	7.91	0.76	1.34	99.24	98.66	565	1044	8	12	1036	1032	60	0.77
NMW559	POWNA486-10	JN891309	Herbarium	Boraginales	Boraginaceae	Myosotis	Myosotis_scorpioides	2003	rbcL	rbcLa-F	rbcLr590	563	23	15	38	525	4	14	521	511	57	6.75	0.76	2.67	99.24	97.33	566	19	22	41	525	5	13	520	512	57	7.24	0.95	2.48	99.05	97.52	567	1050	9	27	1041	1023	57	0.86
NMW2422	POWNA2371-12	JN893381	Herbarium	Boraginales	Boraginaceae	Myosotis	Myosotis_secunda	1991	rbcL	rbcLa-F	rbcLr590	580	45	12	57	523	5	8	518	515	56	9.83	0.96	1.53	99.04	98.47	574	11	40	51	523	4	5	519	518	60	8.89	0.76	0.96	99.24	99.04	573	1046	9	13	1037	1033	58	0.86
NMW896	POWNA487-10	JN890648	Herbarium	Boraginales	Boraginaceae	Myosotis	Myosotis_secunda	1990	rbcL	rbcLa-F	rbcLr590	562	22	13	35	527	6	15	521	512	57	6.23	1.14	2.85	98.86	97.15	565	17	27	44	521	5	14	516	507	57	7.79	0.96	2.69	99.04	97.31	567	1048	11	29	1037	1019	57	1.05
NMW6241	POWNA2299-12	JN892597	Fresh	Boraginales	Boraginaceae	Myosotis	Myosotis_secunda	2011	rbcL	rbcLa-F	rbcLr590	563	26	6	32	531	4	8	527	523	59	5.68	0.75	1.51	99.25	98.49	567	12	26	38	529	4	11	525	518	59	6.7	0.76	2.08	99.24	97.92	575	1060	8	19	1052	1041	59	0.75
NMW2424	POWNA2885-12	JN890916	Herbarium	Boraginales	Boraginaceae	Myosotis	Myosotis_sylvatica	1998	rbcL	rbcLa-F	rbcLa-R	576	35	14	49	527	4	12	523	515	58	8.51	0.76	2.28	99.24	97.72	583	11	51	62	521	4	8	517	513	60	10.63	0.77	1.54	99.23	98.46	580	1048	8	20	1040	1028	59	0.76
NMW2426	POWNA1172-12	JN893385	Herbarium	Boraginales	Boraginaceae	Myosotis	Myosotis_sylvatica	1958	rbcL	rbcLa-F	rbcLa-R	575	27	2	29	546	4	12	542	534	58	5.04	0.73	2.2	99.27	97.8	578	14	35	49	529	4	7	525	522	60	8.48	0.76	1.32	99.24	98.68	587	1075	8	19	1067	1056	59	0.74
NMW2425	POWNA2884-12	JN890914	Herbarium	Boraginales	Boraginaceae	Myosotis	Myosotis_sylvatica	1987	rbcL	rbcLa-F	rbcLr590	564	29	15	44	520	4	9	516	511	54	7.8	0.77	1.73	99.23	98.27	569	4	31	35	534	4	17	530	517	57	6.15	0.75	3.18	99.25	96.82	575	1054	8	26	1046	1028	56	0.76
NMW2435	POWNA3053-12	JN893637	Herbarium	Boraginales	Boraginaceae	Symphytum	Symphytum_officinale	1994	rbcL	rbcLa-F	rbcLa-R	573	26	10	36	537	7	30	530	507	44	6.28	1.3	5.59	98.7	94.41	580	13	40	53	527	4	11	523	516	55	9.14	0.76	2.09	99.24	97.91	579	1064	11	41	1053	1023	49	1.03
NMW2437	POWNA3051-12	JN893635	Herbarium	Boraginales	Boraginaceae	Symphytum	Symphytum_officinale	1983	rbcL	rbcLa-F	rbcLa-R	573	20	13	33	540	4	25	536	515	48	5.76	0.74	4.63	99.26	95.37	574	11	39	50	524	8	39	516	485	44	8.71	1.53	7.44	98.47	92.56	580	1064	12	64	1052	1000	46	1.13
NMW3453	POWNA1783-12	JN891843	Herbarium	Brassicales	Brassicaceae	Alliaria	Alliaria_petiolata	1983	rbcL	rbcLa-F	rbcLr590	568	34	13	47	521	4	6	517	515	58	8.27	0.77	1.15	99.23	98.85	573	14	38	52	521	4	6	517	515	60	9.08	0.77	1.15	99.23	98.85	570	1042	8	12	1034	1030	59	0.77
NMW3452	POWNA1784-12	JN891844	Herbarium	Brassicales	Brassicaceae	Alliaria	Alliaria_petiolata	1992	rbcL	rbcLa-F	rbcLr590	568	23	14	37	531	6	12	525	519	56	6.51	1.13	2.26	98.87	97.74	569	12	30	42	527	4	7	523	520	59	7.38	0.76	1.33	99.24	98.67	572	1058	10	19	1048	1039	58	0.95
NBGW6005	POWNB210-10	JN893074	Fresh	Brassicales	Brassicaceae	Alliaria	Alliaria_petiolata	2010	rbcL	rbcLa-F	rbcLr590	567	30	18	48	519	4	5	515	514	59	8.47	0.77	0.96	99.23	99.04	569	11	26	37	532	4	13	528	519	59	6.5	0.75	2.44	99.25	97.56	571	1051	8	18	1043	1033	59	0.76
NBGW6025	POWNB152-10	JN890631	Fresh	Brassicales	Brassicaceae	Alliaria	Alliaria_petiolata	2010	rbcL	rbcLa-F	rbcLr590	567	23	13	36	531	4	10	527	521	57	6.35	0.75	1.88	99.25	98.12	570	12	22	34	536	4	13	532	523	58	5.96	0.75	2.43	99.25	97.57	573	1067	8	23	1059	1044	57	0.75
NMW3455	POWNA1067-12	JN890747	Herbarium	Brassicales	Brassicaceae	Arabidopsis	Arabidopsis_thaliana	1986	rbcL	rbcLa-F	rbcLr590	565	26	12	38	527	4	6	523	521	60	6.73	0.76	1.14	99.24	98.86	491	172	45	217	274	11	33	263	241	44	44.2	4.01	12.04	95.99	87.96	527	801	15	39	786	762	54	1.87
NMW060	POWNA048-10	JN891749	Herbarium	Brassicales	Brassicaceae	Arabidopsis	Arabidopsis_thaliana	1987	rbcL	rbcLa-F	rbcLr590	895	36	346	382	513	4	16	509	497	49	42.68	0.78	3.12	99.22	96.88	639	94	31	125	514	4	8	510	506	57	19.56	0.78	1.56	99.22	98.44	563	1027	8	24	1019	1003	53	0.78
NMW3454	POWNA1068-12	JN890748	Herbarium	Brassicales	Brassicaceae	Arabidopsis	Arabidopsis_thaliana	1986	rbcL	rbcLa-F	rbcLr590	572	30	8	38	534	4	7	530	527	60	6.64	0.75	1.31	99.25	98.69	569	5	29	34	535	4	8	531	527	60	5.98	0.75	1.5	99.25	98.5	585	1069	8	15	1061	1054	60	0.75
NMW054	POWNA049-10	JN892411	Herbarium	Brassicales	Brassicaceae	Arabis	Arabis_hirsuta	1986	rbcL	rbcLa-F	rbcLr590	908	31	361	392	516	4	12	512	504	51	43.17	0.78	2.33	99.22	97.67	879	328	28	356	523	4	8	519	515	56	40.5	0.76	1.53	99.24	98.47	566	1039	8	20	1031	1019	54	0.77
NMW3457	POWNA1065-12	JN890745	Herbarium	Brassicales	Brassicaceae	Arabis	Arabis_hirsuta	1991	rbcL	rbcLa-F	rbcLr590	567	28	13	41	526	4	7	522	519	60	7.23	0.76	1.33	99.24	98.67	568	13	30	43	525	4	8	521	517	60	7.57	0.76	1.52	99.24	98.48	569	1051	8	15	1043	1036	60	0.76
NMW3456	POWNA1066-12	JN890746	Herbarium	Brassicales	Brassicaceae	Arabis	Arabis_hirsuta	1972	rbcL	rbcLa-F	rbcLr590	569	29	6	35	534	4	4	530	530	60	6.15	0.75	0.75	99.25	99.25	570	4	32	36	534	4	4	530	530	60	6.32	0.75	0.75	99.25	99.25	584	1068	8	8	1060	1060	60	0.75
NMW3459	POWNA1775-12	JN890772	Herbarium	Brassicales	Brassicaceae	Arabis	Arabis_petraea	1925	rbcL	rbcLa-F	rbcLr590	569	38	10	48	521	4	15	517	506	53	8.44	0.77	2.88	99.23	97.12	571	14	43	57	514	6	35	508	479	46	9.98	1.17	6.81	98.83	93.19	576	1035	10	50	1025	985	50	0.97
NMW3460	POWNA1590-12	JN891535	Herbarium	Brassicales	Brassicaceae	Arabis	Arabis_petraea	1933	rbcL	rbcLa-F	rbcLr590	569	44	10	54	515	5	16	510	499	51	9.49	0.97	3.11	99.03	96.89	570	9	47	56	514	4	17	510	497	51	9.82	0.78	3.31	99.22	96.69	579	1029	9	33	1020	996	51	0.87
NMW062	POWNA053-10	JN891747	Herbarium	Brassicales	Brassicaceae	Armoracia	Armoracia_rusticana	1993	rbcL	rbcLa-F	rbcLr590	597	38	47	85	512	10	21	502	491	50	14.24	1.95	4.1	98.05	95.9	880	328	45	373	507	28	50	479	457	52	42.39	5.52	9.86	94.48	90.14	568	1019	38	71	981	948	51	3.73
NMW3461	POWNA1591-12	JN891536	Herbarium	Brassicales	Brassicaceae	Armoracia	Armoracia_rusticana	1979	rbcL	rbcLa-F	rbcLr590	570	16	11	27	543	4	11	539	532	59	4.74	0.74	2.03	99.26	97.97	569	15	27	42	527	4	7	523	520	60	7.38	0.76	1.33	99.24	98.67	574	1070	8	18	1062	1052	59	0.75
NMW3462	POWNA1588-12	JN891533	Herbarium	Brassicales	Brassicaceae	Armoracia	Armoracia_rusticana	1966	rbcL	rbcLa-F	rbcLr590	573	31	8	39	534	4	7	530	527	60	6.81	0.75	1.31	99.25	98.69	569	3	38	41	528	4	9	524	519	58	7.21	0.76	1.7	99.24	98.3	583	1062	8	16	1054	1046	59	0.75
NMW3463	POWNA1589-12	JN891534	Herbarium	Brassicales	Brassicaceae	Barbarea	Barbarea_vulgaris	1988	rbcL	rbcLa-F	rbcLr590	568	29	6	35	533	4	6	529	527	60	6.16	0.75	1.13	99.25	98.87	538	12	33	45	493	6	33	487	460	49	8.36	1.22	6.69	98.78	93.31	578	1026	10	39	1016	987	55	0.97
NMW085	POWNA068-10	JN893072	Herbarium	Brassicales	Brassicaceae	Barbarea	Barbarea_vulgaris	1987	rbcL	rbcLa-F	rbcLr590	568	32	19	51	517	5	19	512	498	51	8.98	0.97	3.68	99.03	96.32	566	19	25	44	522	4	7	518	515	58	7.77	0.77	1.34	99.23	98.66	563	1039	9	26	1030	1013	54	0.87
NMW3464	POWNA1594-12	JN891539	Herbarium	Brassicales	Brassicaceae	Barbarea	Barbarea_vulgaris	1994	rbcL	rbcLa-F	rbcLr590	570	15	15	30	540	5	13	535	527	59	5.26	0.93	2.41	99.07	97.59	570	13	31	44	526	4	8	522	518	60	7.72	0.76	1.52	99.24	98.48	570	1066	9	21	1057	1045	59	0.84
NMW095	POWNA080-10	JN893339	Herbarium	Brassicales	Brassicaceae	Brassica	Brassica_nigra	1985	rbcL	rbcLa-F	rbcLr590	669	51	291	342	327	22	81	305	246	39	51.12	6.73	24.77	93.27	75.23	907	358	36	394	513	57	139	456	374	42	43.44	11.11	27.1	88.89	72.9	513	840	79	220	761	620	41	9.4
NMW3467	POWNA1593-12	JN891538	Herbarium	Brassicales	Brassicaceae	Brassica	Brassica_nigra	1994	rbcL	rbcLa-F	rbcLr590	568	27	16	43	525	4	5	521	520	60	7.57	0.76	0.95	99.24	99.05	572	16	28	44	528	4	7	524	521	60	7.69	0.76	1.33	99.24	98.67	569	1053	8	12	1045	1041	60	0.76
NMW5249	POWNB133-10	JN893428	Fresh	Brassicales	Brassicaceae	Brassica	Brassica_nigra	2010	rbcL	rbcLa-F	rbcLr590	565	26	13	39	526	4	8	522	518	58	6.9	0.76	1.52	99.24	98.48	570	14	28	42	528	5	13	523	515	58	7.37	0.95	2.46	99.05	97.54	572	1054	9	21	1045	1033	58	0.85
NMW3466	POWNA1592-12	JN891537	Herbarium	Brassicales	Brassicaceae	Brassica	Brassica_nigra	1990	rbcL	rbcLa-F	rbcLr590	569	27	10	37	532	4	6	528	526	59	6.5	0.75	1.13	99.25	98.87	567	12	29	41	526	4	8	522	518	59	7.23	0.76	1.52	99.24	98.48	576	1058	8	14	1050	1044	59	0.76
NMW3468	POWNA1595-12	JN891540	Herbarium	Brassicales	Brassicaceae	Brassica	Brassica_oleracea	1986	rbcL	rbcLa-F	rbcLr590	570	28	16	44	526	4	8	522	518	59	7.72	0.76	1.52	99.24	98.48	566	11	32	43	523	5	8	518	515	59	7.6	0.96	1.53	99.04	98.47	571	1049	9	16	1040	1033	59	0.86
NMW3470	POWNA1423-12	JN891282	Herbarium	Brassicales	Brassicaceae	Brassica	Brassica_oleracea	1976	rbcL	rbcLa-F	rbcLr590	568	24	14	38	530	16	80	514	450	39	6.69	3.02	15.09	96.98	84.91	571	11	32	43	528	4	13	524	515	56	7.53	0.76	2.46	99.24	97.54	571	1058	20	93	1038	965	47	1.89
NMW3472	POWNA1424-12	JN891283	Herbarium	Brassicales	Brassicaceae	Brassica	Brassica_rapa	1986	rbcL	rbcLa-F	rbcLr590	568	41	85	126	442	113	275	329	167	25	22.18	25.57	62.22	74.43	37.78	571	48	31	79	492	5	23	487	469	55	13.84	1.02	4.67	98.98	95.33	492	934	118	298	816	636	41	12.63
NMW097	POWNA081-10	JN892499	Herbarium	Brassicales	Brassicaceae	Brassica	Brassica_rapa	1997	rbcL	rbcLa-F	rbcLr590	566	29	18	47	519	5	66	514	453	43	8.3	0.96	12.72	99.04	87.28	569	23	29	52	517	4	12	513	505	54	9.14	0.77	2.32	99.23	97.68	562	1036	9	78	1027	958	48	0.87
NMW3475	POWNA1420-12	JN891279	Herbarium	Brassicales	Brassicaceae	Cakile	Cakile_maritima	1993	rbcL	rbcLa-F	rbcLa-R	578	40	18	58	520	5	21	515	499	56	10.03	0.96	4.04	99.04	95.96	578	15	35	50	528	8	18	520	510	57	8.65	1.52	3.41	98.48	96.59	578	1048	13	39	1035	1009	57	1.24
NMW5101	POWNB033-10	JN890808	Fresh	Brassicales	Brassicaceae	Cakile	Cakile_maritima	2010	rbcL	rbcLa-F	rbcLr590	567	27	14	41	526	5	15	521	511	57	7.23	0.95	2.85	99.05	97.15	568	15	32	47	521	4	8	517	513	59	8.27	0.77	1.54	99.23	98.46	569	1047	9	23	1038	1024	58	0.86
NMW5204	POWNB062-10	JN892480	Fresh	Brassicales	Brassicaceae	Capsella	Capsella_bursa-pastoris	2010	rbcL	rbcLa-F	rbcLr590	566	29	12	41	525	4	11	521	514	57	7.24	0.76	2.1	99.24	97.9	566	7	28	35	531	4	14	527	517	58	6.18	0.75	2.64	99.25	97.36	575	1056	8	25	1048	1031	58	0.76
NBGW6066	POWNB230-10	JN890699	Fresh	Brassicales	Brassicaceae	Capsella	Capsella_bursa-pastoris	2010	rbcL	rbcLa-F	rbcLr590	555	26	7	33	522	4	8	518	514	59	5.95	0.77	1.53	99.23	98.47	564	1	29	30	534	4	15	530	519	59	5.32	0.75	2.81	99.25	97.19	578	1056	8	23	1048	1033	59	0.76
NMW3480	POWNA1892-12	JN891995	Herbarium	Brassicales	Brassicaceae	Cardamine	Cardamine_amara	1977	rbcL	rbcLa-F	rbcLr590	572	65	22	87	485	4	7	481	478	56	15.21	0.82	1.44	99.18	98.56	581	10	71	81	500	4	6	496	494	60	13.94	0.8	1.2	99.2	98.8	560	985	8	13	977	972	58	0.81
NMW3479	POWNA1429-12	JN891288	Herbarium	Brassicales	Brassicaceae	Cardamine	Cardamine_amara	1974	rbcL	rbcLa-F	rbcLr590	574	22	8	30	544	4	11	540	533	59	5.23	0.74	2.02	99.26	97.98	572	15	27	42	530	4	7	526	523	60	7.34	0.75	1.32	99.25	98.68	575	1074	8	18	1066	1056	59	0.74
NMW128	POWNA102-10	JN892704	Herbarium	Brassicales	Brassicaceae	Cardamine	Cardamine_flexuosa	1970	rbcL	rbcLa-F	rbcLr590	601	46	52	98	503	17	41	486	462	49	16.31	3.38	8.15	96.62	91.85	836	283	40	323	513	11	23	502	490	57	38.64	2.14	4.48	97.86	95.52	569	1016	28	64	988	952	53	2.76
NMW3482	POWNA1894-12	JN891997	Herbarium	Brassicales	Brassicaceae	Cardamine	Cardamine_flexuosa	1986	rbcL	rbcLa-F	rbcLr590	576	66	8	74	502	12	19	490	483	54	12.85	2.39	3.78	97.61	96.22	574	2	42	44	530	4	8	526	522	59	7.67	0.75	1.51	99.25	98.49	587	1032	16	27	1016	1005	57	1.55
NMW3481	POWNA1893-12	JN891996	Herbarium	Brassicales	Brassicaceae	Cardamine	Cardamine_flexuosa	1986	rbcL	rbcLa-F	rbcLa-R	573	24	20	44	529	4	9	525	520	59	7.68	0.76	1.7	99.24	98.3	577	13	29	42	535	4	7	531	528	60	7.28	0.75	1.31	99.25	98.69	574	1064	8	16	1056	1048	59	0.75
NMW6139	POWNA2412-12	JN893084	Fresh	Brassicales	Brassicaceae	Cardamine	Cardamine_flexuosa	2011	rbcL	rbcLa-F	rbcLr590	564	26	1	27	537	4	11	533	526	58	4.79	0.74	2.05	99.26	97.95	566	12	26	38	528	4	13	524	515	60	6.71	0.76	2.46	99.24	97.54	580	1065	8	24	1057	1041	59	0.75
NMW5185	POWNB061-10	JN892261	Fresh	Brassicales	Brassicaceae	Cardamine	Cardamine_hirsuta	2010	rbcL	rbcLa-F	rbcLr590	568	27	14	41	527	4	7	523	520	59	7.22	0.76	1.33	99.24	98.67	567	16	25	41	526	4	8	522	518	59	7.23	0.76	1.52	99.24	98.48	567	1053	8	15	1045	1038	59	0.76
NMW3483	POWNA1895-12	JN891998	Herbarium	Brassicales	Brassicaceae	Cardamine	Cardamine_hirsuta	1986	rbcL	rbcLa-F	rbcLr590	570	33	18	51	519	4	7	515	512	60	8.95	0.77	1.35	99.23	98.65	575	1	34	35	540	4	11	536	529	59	6.09	0.74	2.04	99.26	97.96	574	1059	8	18	1051	1041	59	0.76
NMW3484	POWNA1888-12	JN891991	Herbarium	Brassicales	Brassicaceae	Cardamine	Cardamine_hirsuta	1986	rbcL	rbcLa-F	rbcLa-R	574	24	23	47	527	4	7	523	520	59	8.19	0.76	1.33	99.24	98.67	577	15	20	35	542	4	10	538	532	59	6.07	0.74	1.85	99.26	98.15	572	1069	8	17	1061	1052	59	0.75
NMW3485	POWNA1889-12	JN891992	Herbarium	Brassicales	Brassicaceae	Cardamine	Cardamine_hirsuta	1993	rbcL	rbcLa-F	rbcLa-R	573	24	22	46	527	4	8	523	519	58	8.03	0.76	1.52	99.24	98.48	577	15	19	34	543	4	11	539	532	59	5.89	0.74	2.03	99.26	97.97	570	1070	8	19	1062	1051	59	0.75
NMW130	POWNA103-10	JN891233	Herbarium	Brassicales	Brassicaceae	Cardamine	Cardamine_impatiens	1997	rbcL	rbcLa-F	rbcLr590	888	47	337	384	504	5	21	499	483	50	43.24	0.99	4.17	99.01	95.83	717	165	61	226	491	14	20	477	471	56	31.52	2.85	4.07	97.15	95.93	567	995	19	41	976	954	53	1.91
NMW3487	POWNA1891-12	JN891994	Herbarium	Brassicales	Brassicaceae	Cardamine	Cardamine_impatiens	1996	rbcL	rbcLa-F	rbcLr590	568	24	9	33	535	4	9	531	526	59	5.81	0.75	1.68	99.25	98.32	570	11	34	45	525	4	5	521	520	60	7.89	0.76	0.95	99.24	99.05	576	1060	8	14	1052	1046	60	0.75
NMW3488	POWNA1884-12	JN891987	Herbarium	Brassicales	Brassicaceae	Cardamine	Cardamine_pratensis	2003	rbcL	rbcLa-F	rbcLr590	570	29	16	45	525	4	4	521	521	60	7.89	0.76	0.76	99.24	99.24	573	14	32	46	527	4	10	523	517	59	8.03	0.76	1.9	99.24	98.1	570	1052	8	14	1044	1038	60	0.76
NBGW6001	POWNB213-10	JN893058	Fresh	Brassicales	Brassicaceae	Cardamine	Cardamine_pratensis	2010	rbcL	rbcLa-F	rbcLr590	568	26	19	45	523	12	19	511	504	58	7.92	2.29	3.63	97.71	96.37	571	19	26	45	526	4	6	522	520	60	7.88	0.76	1.14	99.24	98.86	565	1049	16	25	1033	1024	59	1.53
NMW3491	POWNA1259-12	JN891764	Herbarium	Brassicales	Brassicaceae	Cardamine	Cardamine_pratensis	1979	rbcL	rbcLa-F	rbcLr590	569	23	13	36	533	4	11	529	522	59	6.33	0.75	2.06	99.25	97.94	571	10	32	42	529	4	8	525	521	59	7.36	0.76	1.51	99.24	98.49	572	1062	8	19	1054	1043	59	0.75
NMW3490	POWNA1260-12	JN891765	Herbarium	Brassicales	Brassicaceae	Cardamine	Cardamine_pratensis	1987	rbcL	rbcLa-F	rbcLr590	569	29	14	43	526	4	5	522	521	60	7.56	0.76	0.95	99.24	99.05	569	12	27	39	530	4	10	526	520	59	6.85	0.75	1.89	99.25	98.11	570	1056	8	15	1048	1041	59	0.76
NMW6054	POWNA1848-12	JN891944	Fresh	Brassicales	Brassicaceae	Cochlearia	Cochlearia_anglica	2011	rbcL	rbcLa-F	rbcLr590	565	28	8	36	529	4	7	525	522	59	6.37	0.76	1.32	99.24	98.68	567	13	32	45	522	4	5	518	517	60	7.94	0.77	0.96	99.23	99.04	573	1051	8	12	1043	1039	59	0.76
NMW6055	POWNA1849-12	JN891945	Fresh	Brassicales	Brassicaceae	Cochlearia	Cochlearia_anglica	2011	rbcL	rbcLa-F	rbcLr590	566	28	8	36	530	4	7	526	523	58	6.36	0.75	1.32	99.25	98.68	567	14	29	43	524	4	6	520	518	60	7.58	0.76	1.15	99.24	98.85	572	1054	8	13	1046	1041	59	0.76
NMW3493	POWNA1727-12	JN891762	Herbarium	Brassicales	Brassicaceae	Cochlearia	Cochlearia_anglica	1987	rbcL	rbcLa-F	rbcL_724R	717	27	9	36	681	4	18	677	663	52	5.02	0.59	2.64	99.41	97.36	722	9	42	51	671	4	6	667	665	57	7.06	0.6	0.89	99.4	99.11	728	1352	8	24	1344	1328	55	0.59
NMW6462	POWNA2273-12	JN892554	Fresh	Brassicales	Brassicaceae	Cochlearia	Cochlearia_anglica	2011	rbcL	rbcLa-F	rbcLr590	564	16	14	30	534	4	13	530	521	56	5.32	0.75	2.43	99.25	97.57	568	9	27	36	532	4	9	528	523	59	6.34	0.75	1.69	99.25	98.31	571	1066	8	22	1058	1044	58	0.75
NMW3495	POWNA1726-12	JN891761	Herbarium	Brassicales	Brassicaceae	Cochlearia	Cochlearia_danica	1993	rbcL	rbcLa-F	rbcLr590	574	48	4	52	522	6	18	516	504	58	9.06	1.15	3.45	98.85	96.55	569	2	52	54	515	10	22	505	493	58	9.49	1.94	4.27	98.06	95.73	587	1037	16	40	1021	997	58	1.54
NMW3496	POWNA1725-12	JN891760	Herbarium	Brassicales	Brassicaceae	Cochlearia	Cochlearia_danica	1986	rbcL	rbcLa-F	rbcLr590	555	25	6	31	524	4	7	520	517	59	5.59	0.76	1.34	99.24	98.66	566	9	28	37	529	4	12	525	517	59	6.54	0.76	2.27	99.24	97.73	569	1053	8	19	1045	1034	59	0.76
NMW6389	POWNA2296-12	JN892594	Fresh	Brassicales	Brassicaceae	Cochlearia	Cochlearia_danica	2011	rbcL	rbcLa-F	rbcLr590	554	26	0	26	528	4	12	524	516	56	4.69	0.76	2.27	99.24	97.73	571	3	32	35	536	4	13	532	523	59	6.13	0.75	2.43	99.25	97.57	579	1064	8	25	1056	1039	58	0.75
NMW6388	POWNA2294-12	JN892590	Fresh	Brassicales	Brassicaceae	Cochlearia	Cochlearia_danica	2011	rbcL	rbcLa-F	rbcLr590	565	24	15	39	526	4	11	522	515	56	6.9	0.76	2.09	99.24	97.91	566	4	27	31	535	4	10	531	525	59	5.48	0.75	1.87	99.25	98.13	575	1061	8	21	1053	1040	58	0.75
NMW231	POWNA191-10	JN893155	Herbarium	Brassicales	Brassicaceae	Cochlearia	Cochlearia_officinalis	1998	rbcL	rbcLa-F	rbcLr590	902	28	354	382	520	4	9	516	511	52	42.35	0.77	1.73	99.23	98.27	711	170	23	193	518	5	12	513	506	57	27.14	0.97	2.32	99.03	97.68	564	1038	9	21	1029	1017	54	0.87
NMW3498	POWNA1346-12	JN891759	Herbarium	Brassicales	Brassicaceae	Cochlearia	Cochlearia_officinalis	1986	rbcL	rbcLa-F	rbcLr590	572	35	14	49	523	4	8	519	515	59	8.57	0.76	1.53	99.24	98.47	572	12	38	50	522	5	9	517	513	59	8.74	0.96	1.72	99.04	98.28	570	1045	9	17	1036	1028	59	0.86
NMW3499	POWNA1723-12	JN891758	Herbarium	Brassicales	Brassicaceae	Cochlearia	Cochlearia_officinalis	1967	rbcL	rbcLa-F	rbcLr590	571	32	5	37	534	4	7	530	527	60	6.48	0.75	1.31	99.25	98.69	567	2	32	34	533	4	5	529	528	60	6	0.75	0.94	99.25	99.06	585	1067	8	12	1059	1055	60	0.75
NMW3500	POWNA1419-12	JN891278	Herbarium	Brassicales	Brassicaceae	Cochlearia	Cochlearia_pyrenaica	1924	rbcL	rbcLa-F	rbcLa-R	575	30	20	50	525	4	10	521	515	57	8.7	0.76	1.9	99.24	98.1	580	15	45	60	520	10	13	510	507	56	10.34	1.92	2.5	98.08	97.5	570	1045	14	23	1031	1022	57	1.34
NBGW6099	POWNB174-10	JN890980	Fresh	Brassicales	Brassicaceae	Cochlearia	Cochlearia_pyrenaica	2010	rbcL	rbcLa-F	rbcLr590	564	20	11	31	533	4	10	529	523	58	5.5	0.75	1.88	99.25	98.12	569	17	27	44	525	4	8	521	517	59	7.73	0.76	1.52	99.24	98.48	571	1058	8	18	1050	1040	59	0.76
NMW3504	POWNA1416-12	JN891266	Herbarium	Brassicales	Brassicaceae	Coincya	Coincya_monensis	1971	rbcL	rbcLa-F	rbcLr590	571	32	11	43	528	4	7	524	521	58	7.53	0.76	1.33	99.24	98.67	576	6	38	44	532	4	10	528	522	58	7.64	0.75	1.88	99.25	98.12	582	1060	8	17	1052	1043	58	0.75
NMW3503	POWNA2595-12	JN892991	Herbarium	Brassicales	Brassicaceae	Coincya	Coincya_monensis	1971	rbcL	rbcLa-F	rbcLr590	570	31	5	36	534	4	6	530	528	59	6.32	0.75	1.12	99.25	98.88	569	2	35	37	532	5	10	527	522	59	6.5	0.94	1.88	99.06	98.12	589	1066	9	16	1057	1050	59	0.84
NMW3508	POWNA1366-12	JN891202	Herbarium	Brassicales	Brassicaceae	Crambe	Crambe_maritima	1931	rbcL	rbcLa-F	rbcLr590	570	109	34	143	427	4	12	423	415	52	25.09	0.94	2.81	99.06	97.19	570	9	75	84	486	8	24	478	462	55	14.74	1.65	4.94	98.35	95.06	554	913	12	36	901	877	54	1.31
NBGW6045	POWNB232-10	JN893554	Fresh	Brassicales	Brassicaceae	Crambe	Crambe_maritima	2010	rbcL	rbcLa-F	rbcLr590	568	29	14	43	525	4	11	521	514	55	7.57	0.76	2.1	99.24	97.9	571	19	28	47	524	4	6	520	518	59	8.23	0.76	1.15	99.24	98.85	569	1049	8	17	1041	1032	57	0.76
NMW5250	POWNB127-10	JN893186	Fresh	Brassicales	Brassicaceae	Crambe	Crambe_maritima	2010	rbcL	rbcLa-F	rbcLr590	567	27	15	42	525	4	8	521	517	58	7.41	0.76	1.52	99.24	98.48	567	17	27	44	523	5	8	518	515	59	7.76	0.96	1.53	99.04	98.47	567	1048	9	16	1039	1032	59	0.86
NMW264	POWNA221-10	JN892038	Herbarium	Brassicales	Brassicaceae	Descurainia	Descurainia_sophia	1983	rbcL	rbcLa-F	rbcLr590	793	29	241	270	523	9	31	514	492	46	34.05	1.72	5.93	98.28	94.07	722	173	30	203	519	4	15	515	504	51	28.12	0.77	2.89	99.23	97.11	569	1042	13	46	1029	996	49	1.25
NMW3511	POWNA2330-12	JN892629	Herbarium	Brassicales	Brassicaceae	Descurainia	Descurainia_sophia	2000	rbcL	rbcLa-F	rbcLr590	559	27	65	92	467	52	158	415	309	33	16.46	11.13	33.83	88.87	66.17	567	16	27	43	524	97	265	427	259	29	7.58	18.51	50.57	81.49	49.43	524	991	149	423	842	568	31	15.04
NMW267	POWNA225-10	JN892041	Herbarium	Brassicales	Brassicaceae	Diplotaxis	Diplotaxis_tenuifolia	1986	rbcL	rbcLa-F	rbcLr590	907	49	356	405	502	15	49	487	453	47	44.65	2.99	9.76	97.01	90.24	577	22	41	63	514	16	30	498	484	56	10.92	3.11	5.84	96.89	94.16	570	1016	31	79	985	937	52	3.05
NMW3512	POWNA2382-12	JN892620	Herbarium	Brassicales	Brassicaceae	Diplotaxis	Diplotaxis_tenuifolia	1977	rbcL	rbcLa-F	rbcLr590	574	38	1	39	535	5	11	530	524	57	6.79	0.93	2.06	99.07	97.94	572	9	34	43	529	4	8	525	521	59	7.52	0.76	1.51	99.24	98.49	584	1064	9	19	1055	1045	58	0.85
NMW3513	POWNA1538-12	JN891458	Herbarium	Brassicales	Brassicaceae	Diplotaxis	Diplotaxis_tenuifolia	2001	rbcL	rbcLa-F	rbcLr590	569	26	11	37	532	4	7	528	525	59	6.5	0.75	1.32	99.25	98.68	571	10	28	38	533	4	11	529	522	59	6.65	0.75	2.06	99.25	97.94	579	1065	8	18	1057	1047	59	0.75
NMW269	POWNA227-10	JN892033	Herbarium	Brassicales	Brassicaceae	Draba	Draba_aizoides	1983	rbcL	rbcLa-F	rbcLr590	729	27	182	209	520	4	12	516	508	50	28.67	0.77	2.31	99.23	97.69	836	286	27	313	523	4	5	519	518	57	37.44	0.76	0.96	99.24	99.04	567	1043	8	17	1035	1026	53	0.77
NMW3515	POWNA2347-12	JN892645	Herbarium	Brassicales	Brassicaceae	Draba	Draba_aizoides	1963	rbcL	rbcLa-F	rbcLr590	569	32	13	45	524	4	5	520	519	60	7.91	0.76	0.95	99.24	99.05	575	11	41	52	523	4	6	519	517	60	9.04	0.76	1.15	99.24	98.85	571	1047	8	11	1039	1036	60	0.76
NMW3514	POWNA2411-12	JN892732	Herbarium	Brassicales	Brassicaceae	Draba	Draba_aizoides	1984	rbcL	rbcLa-F	rbcLr590	574	31	6	37	537	4	12	533	525	59	6.45	0.74	2.23	99.26	97.77	567	11	27	38	529	4	7	525	522	60	6.7	0.76	1.32	99.24	98.68	580	1066	8	19	1058	1047	60	0.75
NMW270	POWNA854-10	JN892242	Herbarium	Brassicales	Brassicaceae	Draba	Draba_incana	1934	rbcL	rbcLa-F	rbcLr506	468	79	13	92	376	19	31	357	345	49	19.66	5.05	8.24	94.95	91.76	485	16	48	64	421	17	29	404	392	52	13.2	4.04	6.89	95.96	93.11	483	797	36	60	761	737	51	4.52
NMW3516	POWNA2331-12	JN892630	Herbarium	Brassicales	Brassicaceae	Draba	Draba_incana	1950	rbcL	rbcLa-F	rbcLr590	568	28	9	37	531	4	8	527	523	60	6.51	0.75	1.51	99.25	98.49	568	10	28	38	530	4	9	526	521	60	6.69	0.75	1.7	99.25	98.3	576	1061	8	17	1053	1044	60	0.75
NMW310	POWNA253-10	JN892019	Herbarium	Brassicales	Brassicaceae	Erophila	Erophila_glabrescens	2005	rbcL	rbcLa-F	rbcLr590	899	43	350	393	506	4	17	502	489	49	43.72	0.79	3.36	99.21	96.64	885	336	116	452	433	11	21	422	412	56	51.07	2.54	4.85	97.46	95.15	564	939	15	38	924	901	52	1.6
NMW3518	POWNA1532-12	JN891452	Herbarium	Brassicales	Brassicaceae	Erophila	Erophila_glabrescens	2006	rbcL	rbcLa-F	rbcLr590	568	29	11	40	528	7	15	521	513	54	7.04	1.33	2.84	98.67	97.16	570	13	31	44	526	4	9	522	517	60	7.72	0.76	1.71	99.24	98.29	572	1054	11	24	1043	1030	57	1.04
NMW3519	POWNA1533-12	JN891453	Herbarium	Brassicales	Brassicaceae	Erophila	Erophila_glabrescens	1991	rbcL	rbcLa-F	rbcLr590	570	29	13	42	528	4	5	524	523	60	7.37	0.76	0.95	99.24	99.05	570	14	30	44	526	4	6	522	520	59	7.72	0.76	1.14	99.24	98.86	574	1054	8	11	1046	1043	60	0.76
NMW6390	POWNA1358-12	JN891194	Fresh	Brassicales	Brassicaceae	Erophila	Erophila_glabrescens	2011	rbcL	rbcLa-F	rbcLr590	565	24	15	39	526	4	6	522	520	56	6.9	0.76	1.14	99.24	98.86	566	9	18	27	539	4	13	535	526	59	4.77	0.74	2.41	99.26	97.59	571	1065	8	19	1057	1046	58	0.75
NMW311	POWNA254-10	JN892020	Herbarium	Brassicales	Brassicaceae	Erophila	Erophila_majuscula	1992	rbcL	rbcLa-F	rbcLr590	911	30	361	391	520	5	18	515	502	50	42.92	0.96	3.46	99.04	96.54	724	178	28	206	518	4	6	514	512	59	28.45	0.77	1.16	99.23	98.84	563	1038	9	24	1029	1014	54	0.87
NMW3521	POWNA1045-12	JN890726	Herbarium	Brassicales	Brassicaceae	Erophila	Erophila_majuscula	1910	rbcL	rbcLa-F	rbcLr590	570	29	8	37	533	4	12	529	521	59	6.49	0.75	2.25	99.25	97.75	569	11	30	41	528	4	8	524	520	59	7.21	0.76	1.52	99.24	98.48	576	1061	8	20	1053	1041	59	0.75
NMW312	POWNA255-10	JN892021	Herbarium	Brassicales	Brassicaceae	Erophila	Erophila_verna	1991	rbcL	rbcLa-F	rbcLr590	646	33	92	125	521	4	11	517	510	52	19.35	0.77	2.11	99.23	97.89	681	133	27	160	521	4	9	517	512	57	23.49	0.77	1.73	99.23	98.27	567	1042	8	20	1034	1022	55	0.77
NMW3523	POWNA1043-12	JN890724	Herbarium	Brassicales	Brassicaceae	Erophila	Erophila_verna	2005	rbcL	rbcLa-F	rbcLr590	569	30	14	44	525	4	7	521	518	60	7.73	0.76	1.33	99.24	98.67	570	13	30	43	527	4	9	523	518	59	7.54	0.76	1.71	99.24	98.29	571	1052	8	16	1044	1036	60	0.76
NMW3522	POWNA1044-12	JN890725	Herbarium	Brassicales	Brassicaceae	Erophila	Erophila_verna	2000	rbcL	rbcLa-F	rbcLr590	568	32	4	36	532	4	8	528	524	60	6.34	0.75	1.5	99.25	98.5	567	8	30	38	529	4	11	525	518	59	6.7	0.76	2.08	99.24	97.92	581	1061	8	19	1053	1042	60	0.75
NMW318	POWNA258-10	JN892509	Herbarium	Brassicales	Brassicaceae	Erysimum	Erysimum_cheiranthoides	1987	rbcL	rbcLa-F	rbcLr590	918	32	368	400	518	4	9	514	509	52	43.57	0.77	1.74	99.23	98.26	907	176	51	227	680	142	180	538	500	48	25.03	20.88	26.47	79.12	73.53	746	1198	146	189	1052	1009	49	12.19
NMW3525	POWNA1049-12	JN890729	Herbarium	Brassicales	Brassicaceae	Erysimum	Erysimum_cheiranthoides	1982	rbcL	rbcLa-F	rbcLr590	570	30	9	39	531	4	7	527	524	60	6.84	0.75	1.32	99.25	98.68	580	1	50	51	529	4	11	525	518	59	8.79	0.76	2.08	99.24	97.92	586	1060	8	18	1052	1042	60	0.75
NMW3524	POWNA1050-12	JN890730	Herbarium	Brassicales	Brassicaceae	Erysimum	Erysimum_cheiranthoides	1999	rbcL	rbcLa-F	rbcLr590	567	26	15	41	526	4	6	522	520	60	7.23	0.76	1.14	99.24	98.86	567	13	26	39	528	4	7	524	521	60	6.88	0.76	1.33	99.24	98.67	569	1054	8	13	1046	1041	60	0.76
NMW319	POWNA259-10	JN892013	Herbarium	Brassicales	Brassicaceae	Erysimum	Erysimum_cheiri	1987	rbcL	rbcLa-F	rbcLr590	686	29	139	168	518	5	15	513	503	51	24.49	0.97	2.9	99.03	97.1	685	133	27	160	525	4	9	521	516	58	23.36	0.76	1.71	99.24	98.29	569	1043	9	24	1034	1019	54	0.86
NMW3527	POWNA1047-12	JN890727	Herbarium	Brassicales	Brassicaceae	Erysimum	Erysimum_cheiri	1973	rbcL	rbcLa-F	rbcLr590	571	24	13	37	534	4	9	530	525	60	6.48	0.75	1.69	99.25	98.31	568	13	33	46	522	4	6	518	516	60	8.1	0.77	1.15	99.23	98.85	572	1056	8	15	1048	1041	60	0.76
NMW3526	POWNA1048-12	JN890728	Herbarium	Brassicales	Brassicaceae	Erysimum	Erysimum_cheiri	1986	rbcL	rbcLa-F	rbcLr590	575	52	29	81	494	4	7	490	487	58	14.09	0.81	1.42	99.19	98.58	569	12	34	46	523	4	7	519	516	60	8.08	0.76	1.34	99.24	98.66	554	1017	8	14	1009	1003	59	0.79
NMW432	POWNA362-10	JN892727	Herbarium	Brassicales	Brassicaceae	Hornungia	Hornungia_petraea	1986	rbcL	rbcLa-F	rbcLr590	568	30	21	51	517	29	102	488	415	43	8.98	5.61	19.73	94.39	80.27	565	20	60	80	485	45	135	440	350	42	14.16	9.28	27.84	90.72	72.16	562	1002	74	237	928	765	42	7.39
NMW3528	POWNA1052-12	JN890733	Herbarium	Brassicales	Brassicaceae	Hornungia	Hornungia_petraea	1925	rbcL	rbcLa-F	rbcLr590	568	32	14	46	522	4	4	518	518	60	8.1	0.77	0.77	99.23	99.23	567	12	33	45	522	4	5	518	517	60	7.94	0.77	0.96	99.23	99.04	570	1044	8	9	1036	1035	60	0.77
NMW3529	POWNA1051-12	JN890732	Herbarium	Brassicales	Brassicaceae	Hornungia	Hornungia_petraea	1940	rbcL	rbcLa-F	rbcLr590	571	32	3	35	536	4	8	532	528	59	6.13	0.75	1.49	99.25	98.51	567	11	28	39	528	4	9	524	519	60	6.88	0.76	1.7	99.24	98.3	581	1064	8	17	1056	1047	59	0.75
NMW489	POWNA417-10	JN891579	Herbarium	Brassicales	Brassicaceae	Lepidium	Lepidium_campestre	1988	rbcL	rbcLa-F	rbcLr590	766	41	216	257	509	5	26	504	483	48	33.55	0.98	5.11	99.02	94.89	649	97	34	131	518	4	10	514	508	56	20.18	0.77	1.93	99.23	98.07	570	1027	9	36	1018	991	52	0.88
NMW3530	POWNA1195-12	JN892842	Herbarium	Brassicales	Brassicaceae	Lepidium	Lepidium_campestre	1988	rbcL	rbcLa-F	rbcLr590	565	26	18	44	521	4	8	517	513	60	7.79	0.77	1.54	99.23	98.46	570	23	27	50	520	4	9	516	511	60	8.77	0.77	1.73	99.23	98.27	555	1041	8	17	1033	1024	60	0.77
NMW3531	POWNA1196-12	JN890951	Herbarium	Brassicales	Brassicaceae	Lepidium	Lepidium_campestre	1993	rbcL	rbcLa-F	rbcLr590	569	32	1	33	536	4	7	532	529	60	5.8	0.75	1.31	99.25	98.69	571	10	31	41	530	4	9	526	521	60	7.18	0.75	1.7	99.25	98.3	582	1066	8	16	1058	1050	60	0.75
NMW239	POWNA196-10	JN893153	Herbarium	Brassicales	Brassicaceae	Lepidium	Lepidium_coronopus	1986	rbcL	rbcLa-F	rbcLr590	761	41	207	248	513	4	26	509	487	47	32.59	0.78	5.07	99.22	94.93	917	351	52	403	514	4	16	510	498	55	43.95	0.78	3.11	99.22	96.89	575	1027	8	42	1019	985	51	0.78
NMW3506	POWNA2584-12	JN891271	Herbarium	Brassicales	Brassicaceae	Lepidium	Lepidium_coronopus	1969	rbcL	rbcLa-F	rbcLr590	568	34	4	38	530	4	7	526	523	60	6.69	0.75	1.32	99.25	98.68	578	10	70	80	498	4	10	494	488	57	13.84	0.8	2.01	99.2	97.99	581	1028	8	17	1020	1011	59	0.78
NMW6483	POWNA1332-12	JN891160	Fresh	Brassicales	Brassicaceae	Lepidium	Lepidium_coronopus	2011	rbcL	rbcLa-F	rbcLr590	563	21	14	35	528	4	8	524	520	56	6.22	0.76	1.52	99.24	98.48	566	9	27	36	530	4	9	526	521	60	6.36	0.75	1.7	99.25	98.3	569	1058	8	17	1050	1041	58	0.76
NMW3505	POWNA2561-12	JN891261	Herbarium	Brassicales	Brassicaceae	Lepidium	Lepidium_coronopus	1992	rbcL	rbcLa-F	rbcLr590	571	32	10	42	529	4	6	525	523	60	7.36	0.76	1.13	99.24	98.87	567	13	22	35	532	4	11	528	521	59	6.17	0.75	2.07	99.25	97.93	572	1061	8	17	1053	1044	60	0.75
NMW488	POWNA418-10	JN891578	Herbarium	Brassicales	Brassicaceae	Lepidium	Lepidium_heterophyllum	1991	rbcL	rbcLa-F	rbcLr590	930	36	378	414	516	4	16	512	500	49	44.52	0.78	3.1	99.22	96.9	902	345	53	398	504	4	6	500	498	57	44.12	0.79	1.19	99.21	98.81	569	1020	8	22	1012	998	53	0.78
NMW3533	POWNA1198-12	JN890953	Herbarium	Brassicales	Brassicaceae	Lepidium	Lepidium_heterophyllum	1963	rbcL	rbcLa-F	rbcLr590	569	23	13	36	533	4	6	529	527	60	6.33	0.75	1.13	99.25	98.87	574	13	35	48	526	4	8	522	518	59	8.36	0.76	1.52	99.24	98.48	572	1059	8	14	1051	1045	59	0.76
NMW3532	POWNA1197-12	JN890952	Herbarium	Brassicales	Brassicaceae	Lepidium	Lepidium_heterophyllum	1988	rbcL	rbcLa-F	rbcLr590	568	17	5	22	546	4	12	542	534	59	3.87	0.73	2.2	99.27	97.8	566	9	27	36	530	4	9	526	521	60	6.36	0.75	1.7	99.25	98.3	578	1076	8	21	1068	1055	59	0.74
NMW491	POWNA419-10	JN891801	Herbarium	Brassicales	Brassicaceae	Lepidium	Lepidium_latifolium	1997	rbcL	rbcLa-F	rbcLr590	907	28	361	389	518	4	14	514	504	51	42.89	0.77	2.7	99.23	97.3	875	327	29	356	519	4	8	515	511	56	40.69	0.77	1.54	99.23	98.46	563	1037	8	22	1029	1015	53	0.77
NMW3534	POWNA1199-12	JN890954	Herbarium	Brassicales	Brassicaceae	Lepidium	Lepidium_latifolium	1986	rbcL	rbcLa-F	rbcLr590	571	33	10	43	528	4	6	524	522	60	7.53	0.76	1.14	99.24	98.86	575	14	41	55	520	4	6	516	514	60	9.57	0.77	1.15	99.23	98.85	571	1048	8	12	1040	1036	60	0.76
NMW3535	POWNA1200-12	JN890955	Herbarium	Brassicales	Brassicaceae	Lepidium	Lepidium_latifolium	2005	rbcL	rbcLa-F	rbcLr590	567	30	7	37	530	4	6	526	524	60	6.53	0.75	1.13	99.25	98.87	568	13	28	41	527	4	7	523	520	60	7.22	0.76	1.33	99.24	98.67	572	1057	8	13	1049	1044	60	0.76
NMW490	POWNA420-10	JN891802	Herbarium	Brassicales	Brassicaceae	Lepidium	Lepidium_ruderale	1991	rbcL	rbcLa-F	rbcLr590	564	29	17	46	518	4	12	514	506	50	8.16	0.77	2.32	99.23	97.68	564	17	28	45	519	4	8	515	511	57	7.98	0.77	1.54	99.23	98.46	565	1037	8	20	1029	1017	53	0.77
NMW3536	POWNA1201-12	JN890956	Herbarium	Brassicales	Brassicaceae	Lepidium	Lepidium_ruderale	1992	rbcL	rbcLa-F	rbcLr590	567	26	12	38	529	4	6	525	523	59	6.7	0.76	1.13	99.24	98.87	567	13	29	42	525	4	5	521	520	60	7.41	0.76	0.95	99.24	99.05	571	1054	8	11	1046	1043	60	0.76
NMW530	POWNA458-10	JN892935	Herbarium	Brassicales	Brassicaceae	Matthiola	Matthiola_sinuata	2007	rbcL	rbcLa-F	rbcLr590	851	36	304	340	511	4	14	507	497	50	39.95	0.78	2.74	99.22	97.26	816	271	23	294	522	4	11	518	511	58	36.03	0.77	2.11	99.23	97.89	566	1033	8	25	1025	1008	54	0.77
NMW3538	POWNA1202-12	JN890957	Herbarium	Brassicales	Brassicaceae	Matthiola	Matthiola_sinuata	1981	rbcL	rbcLa-F	rbcLr590	568	137	4	141	427	4	7	423	420	58	24.82	0.94	1.64	99.06	98.36	574	14	50	64	510	6	20	504	490	55	11.15	1.18	3.92	98.82	96.08	578	937	10	27	927	910	57	1.07
NMW3539	POWNA1203-12	JN890958	Herbarium	Brassicales	Brassicaceae	Matthiola	Matthiola_sinuata	1973	rbcL	rbcLa-F	rbcLr590	567	29	7	36	531	4	7	527	524	60	6.35	0.75	1.32	99.25	98.68	570	9	32	41	529	4	6	525	523	60	7.19	0.76	1.13	99.24	98.87	575	1060	8	13	1052	1047	60	0.75
NMW813	POWNA874-10	JN891917	Herbarium	Brassicales	Brassicaceae	Nasturtium	Nasturtium_microphyllum	1986	rbcL	rbcLa-F	rbcLr506	484	92	10	102	382	16	32	366	350	51	21.07	4.19	8.38	95.81	91.62	483	33	92	125	358	14	40	344	318	48	25.88	3.91	11.17	96.09	88.83	468	740	30	72	710	668	50	4.05
NMW3548	POWNA2972-12	JN893536	Herbarium	Brassicales	Brassicaceae	Nasturtium	Nasturtium_microphyllum	1990	rbcL	rbcLa-F	rbcLr590	566	28	11	39	527	4	6	523	521	59	6.89	0.76	1.14	99.24	98.86	568	19	26	45	523	4	11	519	512	59	7.92	0.76	2.1	99.24	97.9	564	1050	8	17	1042	1033	59	0.76
NMW3547	POWNA2980-12	JN892059	Herbarium	Brassicales	Brassicaceae	Nasturtium	Nasturtium_microphyllum	2002	rbcL	rbcLa-F	rbcLr590	569	33	0	33	536	5	7	531	529	60	5.8	0.93	1.31	99.07	98.69	567	9	28	37	530	4	10	526	520	59	6.53	0.75	1.89	99.25	98.11	582	1066	9	17	1057	1049	60	0.84
NMW3551	POWNA3169-12	JN893808	Herbarium	Brassicales	Brassicaceae	Nasturtium	Nasturtium_officinale	1996	rbcL	rbcLa-F	rbcLr590	570	36	4	40	530	4	6	526	524	60	7.02	0.75	1.13	99.25	98.87	566	8	30	38	528	4	10	524	518	60	6.71	0.76	1.89	99.24	98.11	580	1058	8	16	1050	1042	60	0.76
NMW3550	POWNA3168-12	JN893807	Herbarium	Brassicales	Brassicaceae	Nasturtium	Nasturtium_officinale	2002	rbcL	rbcLa-F	rbcLr590	567	26	16	42	525	4	4	521	521	60	7.41	0.76	0.76	99.24	99.24	568	10	27	37	531	4	11	527	520	59	6.51	0.75	2.07	99.25	97.93	572	1056	8	15	1048	1041	60	0.76
NMW3549	POWNA2971-12	JN893535	Herbarium	Brassicales	Brassicaceae	Nasturtium	Nasturtium_officinale	1992	rbcL	rbcLa-F	rbcLr590	571	28	16	44	527	4	4	523	523	60	7.71	0.76	0.76	99.24	99.24	569	9	28	37	532	4	12	528	520	59	6.5	0.75	2.26	99.25	97.74	573	1059	8	16	1051	1043	59	0.76
NMW6486	POWNA1335-12	JN891163	Fresh	Brassicales	Brassicaceae	Nasturtium	Nasturtium_officinale	2011	rbcL	rbcLa-F	rbcLr590	561	21	12	33	528	4	11	524	517	53	5.88	0.76	2.08	99.24	97.92	566	11	24	35	531	4	10	527	521	59	6.18	0.75	1.88	99.25	98.12	572	1059	8	21	1051	1038	56	0.76
NMW690	POWNA592-10	JN891109	Herbarium	Brassicales	Brassicaceae	Raphanus	Raphanus_raphanistrum	1993	rbcL	rbcLa-F	rbcLr590	899	29	354	383	516	9	49	507	467	42	42.6	1.74	9.5	98.26	90.5	640	94	25	119	521	4	7	517	514	52	18.59	0.77	1.34	99.23	98.66	566	1037	13	56	1024	981	47	1.25
NMW3540	POWNA2975-12	JN892580	Herbarium	Brassicales	Brassicaceae	Raphanus	Raphanus_raphanistrum	1957	rbcL	rbcLa-F	rbcLr590	570	28	13	41	529	19	63	510	466	41	7.19	3.59	11.91	96.41	88.09	571	14	33	47	524	4	13	520	511	54	8.23	0.76	2.48	99.24	97.52	573	1053	23	76	1030	977	48	2.18
NMW691	POWNA593-10	JN891107	Herbarium	Brassicales	Brassicaceae	Raphanus	Raphanus_raphanistrum	1994	rbcL	rbcLa-F	rbcLr590	914	37	365	402	512	5	30	507	482	47	43.98	0.98	5.86	99.02	94.14	570	21	25	46	524	4	10	520	514	54	8.07	0.76	1.91	99.24	98.09	566	1036	9	40	1027	996	50	0.87
NMW809	POWNA600-10	JN891663	Herbarium	Brassicales	Brassicaceae	Rorippa	Rorippa_amphibia	2003	rbcL	rbcLa-F	rbcLr590	553	42	5	47	506	5	16	501	490	50	8.5	0.99	3.16	99.01	96.84	889	340	27	367	522	4	10	518	512	58	41.28	0.77	1.92	99.23	98.08	566	1028	9	26	1019	1002	54	0.88
NMW3542	POWNA2977-12	JN892052	Herbarium	Brassicales	Brassicaceae	Rorippa	Rorippa_amphibia	1991	rbcL	rbcLa-F	rbcLr590	568	31	8	39	529	4	6	525	523	60	6.87	0.76	1.13	99.24	98.87	565	2	29	31	534	5	8	529	526	60	5.49	0.94	1.5	99.06	98.5	583	1063	9	14	1054	1049	60	0.85
NMW811	POWNA601-10	JN891919	Herbarium	Brassicales	Brassicaceae	Rorippa	Rorippa_islandica	1993	rbcL	rbcLa-F	rbcLr590	843	43	294	337	506	8	15	498	491	51	39.98	1.58	2.96	98.42	97.04	603	53	29	82	521	9	15	512	506	57	13.6	1.73	2.88	98.27	97.12	566	1027	17	30	1010	997	54	1.66
NMW3545	POWNA2978-12	JN892055	Herbarium	Brassicales	Brassicaceae	Rorippa	Rorippa_islandica	2007	rbcL	rbcLa-F	rbcLr590	568	16	11	27	541	4	9	537	532	59	4.75	0.74	1.66	99.26	98.34	570	11	34	45	525	4	8	521	517	60	7.89	0.76	1.52	99.24	98.48	575	1066	8	17	1058	1049	59	0.75
NMW3546	POWNA2981-12	JN893545	Herbarium	Brassicales	Brassicaceae	Rorippa	Rorippa_islandica	1993	rbcL	rbcLa-F	rbcLr590	520	61	25	86	434	31	78	403	356	41	16.54	7.14	17.97	92.86	82.03	566	13	28	41	525	4	14	521	511	58	7.24	0.76	2.67	99.24	97.33	538	959	35	92	924	867	50	3.65
NMW3544	POWNA2979-12	JN892058	Herbarium	Brassicales	Brassicaceae	Rorippa	Rorippa_palustris	1993	rbcL	rbcLa-F	rbcLr590	564	27	8	35	529	4	8	525	521	60	6.21	0.76	1.51	99.24	98.49	568	12	33	45	523	4	10	519	513	60	7.92	0.76	1.91	99.24	98.09	573	1052	8	18	1044	1034	60	0.76
NMW810	POWNA602-10	JN891920	Herbarium	Brassicales	Brassicaceae	Rorippa	Rorippa_palustris	1993	rbcL	rbcLa-F	rbcLr590	898	44	348	392	506	4	13	502	493	50	43.65	0.79	2.57	99.21	97.43	562	19	25	44	518	4	8	514	510	54	7.83	0.77	1.54	99.23	98.46	562	1024	8	21	1016	1003	52	0.78
NMW3543	POWNA2976-12	JN892051	Herbarium	Brassicales	Brassicaceae	Rorippa	Rorippa_palustris	1995	rbcL	rbcLa-F	rbcLa-R	572	24	22	46	526	4	7	522	519	59	8.04	0.76	1.33	99.24	98.67	575	13	17	30	545	4	12	541	533	59	5.22	0.73	2.2	99.27	97.8	572	1071	8	19	1063	1052	59	0.75
NMW812	POWNA603-10	JN891918	Herbarium	Brassicales	Brassicaceae	Rorippa	Rorippa_sylvestris	2003	rbcL	rbcLa-F	rbcLr590	564	29	17	46	518	4	16	514	502	49	8.16	0.77	3.09	99.23	96.91	832	287	25	312	520	4	8	516	512	58	37.5	0.77	1.54	99.23	98.46	565	1038	8	24	1030	1014	54	0.77
NMW3553	POWNA3167-12	JN893806	Herbarium	Brassicales	Brassicaceae	Rorippa	Rorippa_sylvestris	2001	rbcL	rbcLa-F	rbcLr590	570	20	6	26	544	4	11	540	533	59	4.56	0.74	2.02	99.26	97.98	568	9	27	36	532	4	11	528	521	59	6.34	0.75	2.07	99.25	97.93	579	1076	8	22	1068	1054	59	0.74
NMW3552	POWNA3166-12	JN893805	Herbarium	Brassicales	Brassicaceae	Rorippa	Rorippa_sylvestris	2002	rbcL	rbcLa-F	rbcLr590	573	31	5	36	537	4	9	533	528	59	6.28	0.74	1.68	99.26	98.32	569	4	30	34	535	4	12	531	523	59	5.98	0.75	2.24	99.25	97.76	584	1072	8	21	1064	1051	59	0.75
NMW3554	POWNA3164-12	JN893803	Herbarium	Brassicales	Brassicaceae	Sinapis	Sinapis_alba	1963	rbcL	rbcLa-F	rbcLr590	572	37	7	44	528	16	46	512	482	43	7.69	3.03	8.71	96.97	91.29	575	9	44	53	522	14	32	508	490	55	9.22	2.68	6.13	97.32	93.87	580	1050	30	78	1020	972	49	2.86
NMW716	POWNA687-10	JN892988	Herbarium	Brassicales	Brassicaceae	Sinapis	Sinapis_alba	1991	rbcL	rbcLa-F	rbcLr590	884	46	333	379	505	6	17	499	488	49	42.87	1.19	3.37	98.81	96.63	567	16	23	39	528	14	23	514	505	55	6.88	2.65	4.36	97.35	95.64	567	1033	20	40	1013	993	52	1.94
NMW3555	POWNA3165-12	JN893672	Herbarium	Brassicales	Brassicaceae	Sinapis	Sinapis_alba	1986	rbcL	rbcLa-F	rbcLr590	570	29	2	31	539	4	14	535	525	58	5.44	0.74	2.6	99.26	97.4	568	4	30	34	534	4	7	530	527	60	5.99	0.75	1.31	99.25	98.69	589	1073	8	21	1065	1052	59	0.75
NMW715	POWNA688-10	JN892987	Herbarium	Brassicales	Brassicaceae	Sinapis	Sinapis_arvensis	1986	rbcL	rbcLa-F	rbcLr590	901	37	352	389	512	4	12	508	500	50	43.17	0.78	2.34	99.22	97.66	725	179	27	206	519	4	6	515	513	57	28.41	0.77	1.16	99.23	98.84	563	1031	8	18	1023	1013	54	0.78
NMW3557	POWNA3163-12	JN893802	Herbarium	Brassicales	Brassicaceae	Sinapis	Sinapis_arvensis	2004	rbcL	rbcLa-F	rbcLr590	576	39	52	91	485	16	29	469	456	54	15.8	3.3	5.98	96.7	94.02	568	9	33	42	526	4	5	522	521	60	7.39	0.76	0.95	99.24	99.05	536	1011	20	34	991	977	57	1.98
NMW3556	POWNA3162-12	JN893801	Herbarium	Brassicales	Brassicaceae	Sinapis	Sinapis_arvensis	1995	rbcL	rbcLa-F	rbcLr590	567	25	7	32	535	4	9	531	526	59	5.64	0.75	1.68	99.25	98.32	568	1	30	31	537	4	7	533	530	59	5.46	0.74	1.3	99.26	98.7	582	1072	8	16	1064	1056	59	0.75
NMW718	POWNA690-10	JN892990	Herbarium	Brassicales	Brassicaceae	Sisymbrium	Sisymbrium_officinale	1993	rbcL	rbcLa-F	rbcLr590	927	48	375	423	504	13	33	491	471	48	45.63	2.58	6.55	97.42	93.45	568	15	37	52	516	5	13	511	503	55	9.15	0.97	2.52	99.03	97.48	569	1020	18	46	1002	974	52	1.76
NMW3559	POWNA3171-12	JN893810	Herbarium	Brassicales	Brassicaceae	Sisymbrium	Sisymbrium_officinale	1993	rbcL	rbcLa-F	rbcLr590	567	29	10	39	528	4	5	524	523	59	6.88	0.76	0.95	99.24	99.05	571	17	26	43	528	4	8	524	520	59	7.53	0.76	1.52	99.24	98.48	573	1056	8	13	1048	1043	59	0.76
NMW3558	POWNA3170-12	JN893809	Herbarium	Brassicales	Brassicaceae	Sisymbrium	Sisymbrium_officinale	1961	rbcL	rbcLa-F	rbcLr590	569	21	4	25	544	4	12	540	532	58	4.39	0.74	2.21	99.26	97.79	569	7	27	34	535	4	15	531	520	58	5.98	0.75	2.8	99.25	97.2	580	1079	8	27	1071	1052	58	0.74
NMW6375	POWNA1314-12	JN891134	Fresh	Brassicales	Brassicaceae	Sisymbrium	Sisymbrium_officinale	2011	rbcL	rbcLa-F	rbcLr590	552	23	2	25	527	4	13	523	514	52	4.53	0.76	2.47	99.24	97.53	565	12	19	31	534	4	11	530	523	58	5.49	0.75	2.06	99.25	97.94	570	1061	8	24	1053	1037	55	0.75
NMW979	POWNA751-10	JN891343	Herbarium	Brassicales	Brassicaceae	Thlaspi	Thlaspi_arvense	1995	rbcL	rbcLa-F	rbcLr590	919	31	381	412	507	9	33	498	474	46	44.83	1.78	6.51	98.22	93.49	646	101	32	133	513	22	35	491	478	53	20.59	4.29	6.82	95.71	93.18	553	1020	31	68	989	952	50	3.04
NMW3567	POWNA2634-12	JN893028	Herbarium	Brassicales	Brassicaceae	Thlaspi	Thlaspi_arvense	1986	rbcL	rbcLa-F	rbcLr590	575	48	3	51	524	10	21	514	503	52	8.87	1.91	4.01	98.09	95.99	575	11	41	52	523	10	20	513	503	55	9.04	1.91	3.82	98.09	96.18	583	1047	20	41	1027	1006	54	1.91
NMW3566	POWNA2635-12	JN893029	Herbarium	Brassicales	Brassicaceae	Thlaspi	Thlaspi_arvense	1975	rbcL	rbcLa-F	rbcLr590	571	34	6	40	531	4	9	527	522	57	7.01	0.75	1.69	99.25	98.31	571	10	31	41	530	4	12	526	518	59	7.18	0.75	2.26	99.25	97.74	583	1061	8	21	1053	1040	58	0.75
NMW978	POWNA752-10	JN891339	Herbarium	Brassicales	Brassicaceae	Thlaspi	Thlaspi_caerulescens	1955	rbcL	rbcLa-F	rbcLr590	895	27	349	376	519	4	13	515	506	50	42.01	0.77	2.5	99.23	97.5	648	102	23	125	523	15	25	508	498	54	19.29	2.87	4.78	97.13	95.22	563	1042	19	38	1023	1004	52	1.82
NMW3569	POWNA2633-12	JN893027	Herbarium	Brassicales	Brassicaceae	Thlaspi	Thlaspi_caerulescens	1985	rbcL	rbcLa-F	rbcLr590	569	28	10	38	531	4	9	527	522	59	6.68	0.75	1.69	99.25	98.31	566	14	25	39	527	5	10	522	517	59	6.89	0.95	1.9	99.05	98.1	574	1058	9	19	1049	1039	59	0.85
NMW689	POWNA594-10	JN892081	Herbarium	Brassicales	Resedaceae	Reseda	Reseda_lutea	1987	rbcL	rbcLa-F	rbcLr590	908	54	348	402	506	24	90	482	416	39	44.27	4.74	17.79	95.26	82.21	566	18	24	42	524	4	7	520	517	58	7.42	0.76	1.34	99.24	98.66	571	1030	28	97	1002	933	48	2.72
NMW3571	POWNA2820-12	JN893302	Herbarium	Brassicales	Resedaceae	Reseda	Reseda_lutea	1979	rbcL	rbcLa-F	rbcLr590	569	30	9	39	530	4	8	526	522	60	6.85	0.75	1.51	99.25	98.49	568	1	34	35	533	4	7	529	526	59	6.16	0.75	1.31	99.25	98.69	585	1063	8	15	1055	1048	59	0.75
NMW3570	POWNA2819-12	JN893301	Herbarium	Brassicales	Resedaceae	Reseda	Reseda_lutea	1963	rbcL	rbcLa-F	rbcLr590	568	27	11	38	530	4	8	526	522	60	6.69	0.75	1.51	99.25	98.49	569	5	29	34	535	4	14	531	521	59	5.98	0.75	2.62	99.25	97.38	581	1065	8	22	1057	1043	59	0.75
NMW3573	POWNA2822-12	JN893304	Herbarium	Brassicales	Resedaceae	Reseda	Reseda_luteola	1992	rbcL	rbcLa-F	rbcLr590	575	41	4	45	530	4	5	526	525	60	7.83	0.75	0.94	99.25	99.06	573	4	40	44	529	4	8	525	521	59	7.68	0.76	1.51	99.24	98.49	585	1059	8	13	1051	1046	60	0.76
NMW3572	POWNA976-12	JN893303	Herbarium	Brassicales	Resedaceae	Reseda	Reseda_luteola	1977	rbcL	rbcLa-F	rbcLr590	575	41	4	45	530	4	5	526	525	60	7.83	0.75	0.94	99.25	99.06	573	4	40	44	529	4	8	525	521	59	7.68	0.76	1.51	99.24	98.49	585	1059	8	13	1051	1046	60	0.76
NMW804	POWNA595-10	JN891667	Herbarium	Brassicales	Resedaceae	Reseda	Reseda_luteola	1984	rbcL	rbcLa-F	rbcLr590	564	26	15	41	523	5	17	518	506	50	7.27	0.96	3.25	99.04	96.75	562	13	29	42	520	4	8	516	512	57	7.47	0.77	1.54	99.23	98.46	566	1043	9	25	1034	1018	53	0.86
NMW072	POWNA838-10	JN891981	Herbarium	Caryophyllales	Amaranthaceae	Atriplex	Atriplex_glabriuscula	1997	rbcL	rbcLa-F	rbcLr506	566	17	110	127	439	8	19	431	420	56	22.44	1.82	4.33	98.18	95.67	480	12	24	36	444	12	22	432	422	56	7.5	2.7	4.95	97.3	95.05	488	883	20	41	863	842	56	2.27
NMW2854	POWNA1089-12	JN890778	Herbarium	Caryophyllales	Amaranthaceae	Atriplex	Atriplex_laciniata	1972	rbcL	rbcLa-F	rbcLa-R	578	52	13	65	513	5	13	508	500	54	11.25	0.97	2.53	99.03	97.47	591	11	59	70	521	6	12	515	509	59	11.84	1.15	2.3	98.85	97.7	581	1034	11	25	1023	1009	57	1.06
NMW5115	POWNB032-10	JN891030	Fresh	Caryophyllales	Amaranthaceae	Atriplex	Atriplex_laciniata	2010	rbcL	rbcLa-F	rbcLr590	564	26	13	39	525	4	11	521	514	59	6.91	0.76	2.1	99.24	97.9	565	16	26	42	523	4	7	519	516	59	7.43	0.76	1.34	99.24	98.66	567	1048	8	18	1040	1030	59	0.76
NMW2859	POWNA1914-12	JN892025	Herbarium	Caryophyllales	Amaranthaceae	Atriplex	Atriplex_littoralis	1993	rbcL	rbcLa-F	rbcLr590	576	67	0	67	509	6	18	503	491	56	11.63	1.18	3.54	98.82	96.46	573	8	55	63	510	5	21	505	489	51	10.99	0.98	4.12	99.02	95.88	585	1019	11	39	1008	980	53	1.08
NMW2858	POWNA1085-12	JN890774	Herbarium	Caryophyllales	Amaranthaceae	Atriplex	Atriplex_littoralis	1993	rbcL	rbcLa-F	rbcLr590	568	33	15	48	520	7	36	513	484	50	8.45	1.35	6.92	98.65	93.08	569	10	32	42	527	4	13	523	514	59	7.38	0.76	2.47	99.24	97.53	570	1047	11	49	1036	998	54	1.05
NMW2857	POWNA1917-12	JN892034	Herbarium	Caryophyllales	Amaranthaceae	Atriplex	Atriplex_littoralis	2007	rbcL	rbcLa-F	rbcLr590	568	33	12	45	523	11	38	512	485	48	7.92	2.1	7.27	97.9	92.73	571	1	30	31	540	4	12	536	528	58	5.43	0.74	2.22	99.26	97.78	582	1063	15	50	1048	1013	53	1.41
NMW2861	POWNA1227-12	JN890999	Herbarium	Caryophyllales	Amaranthaceae	Atriplex	Atriplex_longipes	1994	rbcL	rbcLa-F	rbcLa-R	583	76	28	104	479	4	18	475	461	54	17.84	0.84	3.76	99.16	96.24	590	3	61	64	526	13	22	513	504	55	10.85	2.47	4.18	97.53	95.82	571	1005	17	40	988	965	54	1.69
NMW075	POWNA839-10	JN891982	Herbarium	Caryophyllales	Amaranthaceae	Atriplex	Atriplex_longipes	1993	rbcL	rbcLa-F	rbcLr506	482	36	11	47	435	14	21	421	414	55	9.75	3.22	4.83	96.78	95.17	481	11	41	52	429	17	28	412	401	55	10.81	3.96	6.53	96.04	93.47	490	864	31	49	833	815	55	3.59
NMW5001	POWNB086-10	JN890599	Fresh	Caryophyllales	Amaranthaceae	Atriplex	Atriplex_patula	2010	rbcL	rbcLa-F	rbcLr590	567	29	13	42	525	4	9	521	516	59	7.41	0.76	1.71	99.24	98.29	570	13	32	45	525	4	9	521	516	59	7.89	0.76	1.71	99.24	98.29	571	1050	8	18	1042	1032	59	0.76
NMW2862	POWNA1228-12	JN891001	Herbarium	Caryophyllales	Amaranthaceae	Atriplex	Atriplex_patula	1993	rbcL	rbcLa-F	rbcLr590	571	36	9	45	526	4	12	522	514	57	7.88	0.76	2.28	99.24	97.72	567	10	32	42	525	4	10	521	515	59	7.41	0.76	1.9	99.24	98.1	577	1051	8	22	1043	1029	58	0.76
NMW2904	POWNA1391-12	JN891227	Herbarium	Caryophyllales	Amaranthaceae	Atriplex	Atriplex_patula	1998	rbcL	rbcLa-F	rbcLr590	568	34	7	41	527	7	18	520	509	53	7.22	1.33	3.42	98.67	96.58	564	10	31	41	523	4	12	519	511	57	7.27	0.76	2.29	99.24	97.71	576	1050	11	30	1039	1020	55	1.05
NMW077	POWNA063-10	JN891983	Herbarium	Caryophyllales	Amaranthaceae	Atriplex	Atriplex_portulacoides	1993	rbcL	rbcLa-F	rbcLr590	653	59	94	153	500	4	14	496	486	50	23.43	0.8	2.8	99.2	97.2	568	12	56	68	500	4	7	496	493	55	11.97	0.8	1.4	99.2	98.6	571	1000	8	21	992	979	52	0.8
NMW2865	POWNA1229-12	JN891002	Herbarium	Caryophyllales	Amaranthaceae	Atriplex	Atriplex_portulacoides	1993	rbcL	rbcLa-F	rbcLa-R	580	46	13	59	521	4	8	517	513	57	10.17	0.77	1.54	99.23	98.46	580	14	47	61	519	4	6	515	513	60	10.52	0.77	1.16	99.23	98.84	577	1040	8	14	1032	1026	58	0.77
NMW6469	POWNA2268-12	JN892549	Fresh	Caryophyllales	Amaranthaceae	Atriplex	Atriplex_portulacoides	2011	rbcL	rbcLa-F	rbcLr590	562	28	12	40	522	4	4	518	518	56	7.12	0.77	0.77	99.23	99.23	571	6	35	41	530	4	8	526	522	59	7.18	0.75	1.51	99.25	98.49	576	1052	8	12	1044	1040	58	0.76
NMW6461	POWNA2270-12	JN892551	Fresh	Caryophyllales	Amaranthaceae	Atriplex	Atriplex_portulacoides	2011	rbcL	rbcLa-F	rbcLr590	564	27	17	44	520	5	13	515	507	54	7.8	0.96	2.5	99.04	97.5	569	6	30	36	533	4	13	529	520	57	6.33	0.75	2.44	99.25	97.56	574	1053	9	26	1044	1027	55	0.85
NMW078	POWNA840-10	JN891977	Herbarium	Caryophyllales	Amaranthaceae	Atriplex	Atriplex_prostrata	2000	rbcL	rbcLa-F	rbcLr506	677	26	221	247	430	11	26	419	404	52	36.48	2.56	6.05	97.44	93.95	563	100	41	141	422	11	28	411	394	52	25.04	2.61	6.64	97.39	93.36	483	852	22	54	830	798	52	2.58
NMW2867	POWNA1230-12	JN891004	Herbarium	Caryophyllales	Amaranthaceae	Atriplex	Atriplex_prostrata	1993	rbcL	rbcLa-F	rbcLr590	572	41	10	51	521	4	7	517	514	60	8.92	0.77	1.34	99.23	98.66	572	10	42	52	520	4	7	516	513	60	9.09	0.77	1.35	99.23	98.65	572	1041	8	14	1033	1027	60	0.77
NMW6386	POWNA1519-12	JN891439	Fresh	Caryophyllales	Amaranthaceae	Atriplex	Atriplex_prostrata	2011	rbcL	rbcLa-F	rbcLr590	562	26	15	41	521	4	8	517	513	56	7.3	0.77	1.54	99.23	98.46	567	11	29	40	527	4	8	523	519	59	7.05	0.76	1.52	99.24	98.48	571	1048	8	16	1040	1032	58	0.76
NMW083	POWNA071-10	JN893070	Herbarium	Caryophyllales	Amaranthaceae	Beta	Beta_vulgaris	1993	rbcL	rbcLa-F	rbcLr590	636	30	85	115	521	7	26	514	495	45	18.08	1.34	4.99	98.66	95.01	640	88	72	160	480	4	19	476	461	50	25	0.83	3.96	99.17	96.04	569	1001	11	45	990	956	47	1.1
NMW2868	POWNA1224-12	JN890993	Herbarium	Caryophyllales	Amaranthaceae	Beta	Beta_vulgaris	1981	rbcL	rbcLa-F	rbcLr590	580	65	1	66	514	4	10	510	504	58	11.38	0.78	1.95	99.22	98.05	576	10	65	75	501	8	10	493	491	59	13.02	1.6	2	98.4	98	585	1015	12	20	1003	995	59	1.18
NMW2869	POWNA2899-12	JN890992	Herbarium	Caryophyllales	Amaranthaceae	Beta	Beta_vulgaris	2004	rbcL	rbcLa-F	rbcLr590	617	43	69	112	505	10	10	495	495	59	18.15	1.98	1.98	98.02	98.02	569	17	22	39	530	4	9	526	521	59	6.85	0.75	1.7	99.25	98.3	562	1035	14	19	1021	1016	59	1.35
NMW6481	POWNA1334-12	JN891162	Fresh	Caryophyllales	Amaranthaceae	Beta	Beta_vulgaris	2011	rbcL	rbcLa-F	rbcLr590	561	22	12	34	527	4	9	523	518	55	6.06	0.76	1.71	99.24	98.29	566	11	26	37	529	4	8	525	521	59	6.54	0.76	1.51	99.24	98.49	570	1056	8	17	1048	1039	57	0.76
NMW205	POWNA169-10	JN892465	Herbarium	Caryophyllales	Amaranthaceae	Chenopodium	Chenopodium_album	1993	rbcL	rbcLa-F	rbcLr590	643	28	96	124	519	7	31	512	488	44	19.28	1.35	5.97	98.65	94.03	635	89	25	114	521	4	13	517	508	58	17.95	0.77	2.5	99.23	97.5	565	1040	11	44	1029	996	51	1.06
NMW2870	POWNA1408-12	JN891255	Herbarium	Caryophyllales	Amaranthaceae	Chenopodium	Chenopodium_album	1983	rbcL	rbcLa-F	rbcLr590	573	34	15	49	524	4	10	520	514	59	8.55	0.76	1.91	99.24	98.09	575	26	41	67	508	5	11	503	497	55	11.65	0.98	2.17	99.02	97.83	557	1032	9	21	1023	1011	57	0.87
NMW6383	POWNA1523-12	JN891443	Fresh	Caryophyllales	Amaranthaceae	Chenopodium	Chenopodium_album	2011	rbcL	rbcLa-F	rbcLr590	564	26	9	35	529	4	11	525	518	55	6.21	0.76	2.08	99.24	97.92	564	11	28	39	525	4	8	521	517	60	6.91	0.76	1.52	99.24	98.48	575	1054	8	19	1046	1035	57	0.76
NMW2871	POWNA1409-12	JN891256	Herbarium	Caryophyllales	Amaranthaceae	Chenopodium	Chenopodium_album	2001	rbcL	rbcLa-F	rbcLr590	569	30	11	41	528	4	6	524	522	60	7.21	0.76	1.14	99.24	98.86	569	4	34	38	531	4	14	527	517	59	6.68	0.75	2.64	99.25	97.36	582	1059	8	20	1051	1039	59	0.76
NMW2873	POWNA1407-12	JN891254	Herbarium	Caryophyllales	Amaranthaceae	Chenopodium	Chenopodium_bonus-henricus	1996	rbcL	rbcLa-F	rbcLr590	571	36	14	50	521	7	42	514	479	51	8.76	1.34	8.06	98.66	91.94	569	10	38	48	521	12	45	509	476	52	8.44	2.3	8.64	97.7	91.36	571	1042	19	87	1023	955	51	1.82
NMW2872	POWNA1406-12	JN891253	Herbarium	Caryophyllales	Amaranthaceae	Chenopodium	Chenopodium_bonus-henricus		rbcL	rbcLa-F	rbcLr590	569	32	13	45	524	4	4	520	520	60	7.91	0.76	0.76	99.24	99.24	567	13	25	38	529	5	10	524	519	59	6.7	0.95	1.89	99.05	98.11	570	1053	9	14	1044	1039	60	0.85
NMW207	POWNA171-10	JN892463	Herbarium	Caryophyllales	Amaranthaceae	Chenopodium	Chenopodium_ficifolium	1993	rbcL	rbcLa-F	rbcLr590	646	25	100	125	521	6	26	515	495	46	19.35	1.15	4.99	98.85	95.01	646	97	28	125	521	4	9	517	512	57	19.35	0.77	1.73	99.23	98.27	567	1042	10	35	1032	1007	52	0.96
NMW2874	POWNA1404-12	JN891251	Herbarium	Caryophyllales	Amaranthaceae	Chenopodium	Chenopodium_ficifolium	1988	rbcL	rbcLa-F	rbcLr590	564	29	8	37	527	4	7	523	520	60	6.56	0.76	1.33	99.24	98.67	572	15	48	63	509	4	6	505	503	59	11.01	0.79	1.18	99.21	98.82	572	1036	8	13	1028	1023	60	0.77
NMW2875	POWNA1405-12	JN891252	Herbarium	Caryophyllales	Amaranthaceae	Chenopodium	Chenopodium_ficifolium	1986	rbcL	rbcLa-F	rbcLr590	568	31	5	36	532	4	13	528	519	56	6.34	0.75	2.44	99.25	97.56	568	12	45	57	511	4	5	507	506	60	10.04	0.78	0.98	99.22	99.02	579	1043	8	18	1035	1025	58	0.77
NMW6384	POWNA1517-12	JN891437	Fresh	Caryophyllales	Amaranthaceae	Chenopodium	Chenopodium_ficifolium	2011	rbcL	rbcLa-F	rbcLr590	563	24	8	32	531	4	16	527	515	55	5.68	0.75	3.01	99.25	96.99	568	9	32	41	527	4	8	523	519	59	7.22	0.76	1.52	99.24	98.48	574	1058	8	24	1050	1034	57	0.76
NMW208	POWNA172-10	JN892466	Herbarium	Caryophyllales	Amaranthaceae	Chenopodium	Chenopodium_glaucum	1988	rbcL	rbcLa-F	rbcLr590	621	54	68	122	499	10	51	489	448	42	19.65	2	10.22	98	89.78	572	11	74	85	487	8	44	479	443	47	14.86	1.64	9.03	98.36	90.97	575	986	18	95	968	891	44	1.83
NMW2876	POWNA1509-12	JN891249	Herbarium	Caryophyllales	Amaranthaceae	Chenopodium	Chenopodium_glaucum	1986	rbcL	rbcLa-F	rbcLr590	577	39	9	48	529	4	9	525	520	56	8.32	0.76	1.7	99.24	98.3	572	12	33	45	527	4	7	523	520	59	7.87	0.76	1.33	99.24	98.67	579	1056	8	16	1048	1040	57	0.76
NMW2877	POWNA1403-12	JN891250	Herbarium	Caryophyllales	Amaranthaceae	Chenopodium	Chenopodium_glaucum	1982	rbcL	rbcLa-F	rbcLr590	564	28	14	42	522	4	8	518	514	57	7.45	0.77	1.53	99.23	98.47	566	11	30	41	525	4	10	521	515	59	7.24	0.76	1.9	99.24	98.1	570	1047	8	18	1039	1029	58	0.76
NMW2878	POWNA1412-12	JN891259	Herbarium	Caryophyllales	Amaranthaceae	Chenopodium	Chenopodium_murale	1971	rbcL	rbcLa-F	rbcLr590	574	58	3	61	513	4	5	509	508	59	10.63	0.78	0.97	99.22	99.03	570	1	60	61	509	4	9	505	500	54	10.7	0.79	1.77	99.21	98.23	588	1022	8	14	1014	1008	57	0.78
NMW2879	POWNA1561-12	JN891260	Herbarium	Caryophyllales	Amaranthaceae	Chenopodium	Chenopodium_murale	2005	rbcL	rbcLa-F	rbcLr590	565	29	7	36	529	4	7	525	522	60	6.37	0.76	1.32	99.24	98.68	570	1	36	37	533	4	9	529	524	59	6.49	0.75	1.69	99.25	98.31	586	1062	8	16	1054	1046	59	0.75
NMW210	POWNA174-10	JN892680	Herbarium	Caryophyllales	Amaranthaceae	Chenopodium	Chenopodium_polyspermum	1988	rbcL	rbcLa-F	rbcLr590	619	24	74	98	521	5	34	516	487	45	15.83	0.96	6.53	99.04	93.47	643	95	27	122	521	4	17	517	504	57	18.97	0.77	3.26	99.23	96.74	566	1042	9	51	1033	991	51	0.86
NMW2880	POWNA2540-12	JN892911	Herbarium	Caryophyllales	Amaranthaceae	Chenopodium	Chenopodium_polyspermum	1992	rbcL	rbcLa-F	rbcLr590	565	25	14	39	526	4	6	522	520	59	6.9	0.76	1.14	99.24	98.86	572	13	32	45	527	6	11	521	516	59	7.87	1.14	2.09	98.86	97.91	571	1053	10	17	1043	1036	59	0.95
NMW2881	POWNA2539-12	JN892910	Herbarium	Caryophyllales	Amaranthaceae	Chenopodium	Chenopodium_polyspermum	1990	rbcL	rbcLa-F	rbcLr590	565	26	18	44	521	4	6	517	515	60	7.79	0.77	1.15	99.23	98.85	567	11	24	35	532	4	11	528	521	59	6.17	0.75	2.07	99.25	97.93	568	1053	8	17	1045	1036	59	0.76
NMW211	POWNA175-10	JN892679	Herbarium	Caryophyllales	Amaranthaceae	Chenopodium	Chenopodium_rubrum	1987	rbcL	rbcLa-F	rbcLr590	621	30	73	103	518	5	28	513	490	45	16.59	0.97	5.41	99.03	94.59	639	88	38	126	513	4	7	509	506	59	19.72	0.78	1.36	99.22	98.64	566	1031	9	35	1022	996	52	0.87
NMW2883	POWNA2537-12	JN892908	Herbarium	Caryophyllales	Amaranthaceae	Chenopodium	Chenopodium_rubrum	1985	rbcL	rbcLa-F	rbcLr590	569	29	6	35	534	4	11	530	523	60	6.15	0.75	2.06	99.25	97.94	567	11	29	40	527	7	14	520	513	59	7.05	1.33	2.66	98.67	97.34	579	1061	11	25	1050	1036	59	1.04
NMW2882	POWNA2538-12	JN892909	Herbarium	Caryophyllales	Amaranthaceae	Chenopodium	Chenopodium_rubrum	2001	rbcL	rbcLa-F	rbcLr590	555	22	3	25	530	4	13	526	517	59	4.5	0.75	2.45	99.25	97.55	567	6	27	33	534	4	15	530	519	59	5.82	0.75	2.81	99.25	97.19	575	1064	8	28	1056	1036	59	0.75
NMW212	POWNA176-10	JN892682	Herbarium	Caryophyllales	Amaranthaceae	Chenopodium	Chenopodium_urbicum	1924	rbcL	rbcLa-F	rbcLr590	559	32	10	42	517	14	39	503	478	48	7.51	2.71	7.54	97.29	92.46	634	83	68	151	483	8	30	475	453	52	23.82	1.66	6.21	98.34	93.79	574	1000	22	69	978	931	50	2.2
NMW2885	POWNA2543-12	JN892914	Herbarium	Caryophyllales	Amaranthaceae	Chenopodium	Chenopodium_urbicum	1932	rbcL	rbcLa-F	rbcLr590	567	114	4	118	449	4	7	445	442	57	20.81	0.89	1.56	99.11	98.44	572	4	83	87	485	12	22	473	463	54	15.21	2.47	4.54	97.53	95.46	587	934	16	29	918	905	55	1.71
NMW2884	POWNA2544-12	JN892915	Herbarium	Caryophyllales	Amaranthaceae	Chenopodium	Chenopodium_urbicum	1949	rbcL	rbcLa-F	rbcLr590	563	28	11	39	524	4	9	520	515	59	6.93	0.76	1.72	99.24	98.28	568	17	30	47	521	4	7	517	514	60	8.27	0.77	1.34	99.23	98.66	567	1045	8	16	1037	1029	59	0.77
NMW213	POWNA177-10	JN892681	Herbarium	Caryophyllales	Amaranthaceae	Chenopodium	Chenopodium_vulvaria	1927	rbcL	rbcLa-F	rbcLr590	622	88	64	152	470	10	33	460	437	44	24.44	2.13	7.02	97.87	92.98	564	21	133	154	410	12	49	398	361	40	27.3	2.93	11.95	97.07	88.05	569	880	22	82	858	798	42	2.5
NMW2886	POWNA2542-12	JN892913	Herbarium	Caryophyllales	Amaranthaceae	Chenopodium	Chenopodium_vulvaria	1925	rbcL	rbcLa-F	rbcLr590	577	131	55	186	391	10	24	381	367	48	32.24	2.56	6.14	97.44	93.86	584	7	142	149	435	4	7	431	428	55	25.51	0.92	1.61	99.08	98.39	544	826	14	31	812	795	51	1.69
NMW2887	POWNA2541-12	JN892912	Herbarium	Caryophyllales	Amaranthaceae	Chenopodium	Chenopodium_vulvaria	1907	rbcL	rbcLa-F	rbcLr590	572	60	5	65	507	9	43	498	464	47	11.36	1.78	8.48	98.22	91.52	567	9	54	63	504	6	22	498	482	54	11.11	1.19	4.37	98.81	95.63	585	1011	15	65	996	946	51	1.48
NMW2888	POWNA2536-12	JN892907	Herbarium	Caryophyllales	Amaranthaceae	Chenopodium	Chenopodium_vulvaria	1921	rbcL	rbcLa-F	rbcLr590	561	31	3	34	527	4	10	523	517	59	6.06	0.76	1.9	99.24	98.1	566	9	33	42	524	4	6	520	518	59	7.42	0.76	1.15	99.24	98.85	579	1051	8	16	1043	1035	59	0.76
NMW747	POWNA632-10	JN890857	Herbarium	Caryophyllales	Amaranthaceae	Salicornia	Salicornia_dolichostachya	1976	rbcL	rbcLa-F	rbcLr590	618	28	72	100	518	5	25	513	493	47	16.18	0.97	4.83	99.03	95.17	643	96	30	126	517	4	6	513	511	59	19.6	0.77	1.16	99.23	98.84	564	1035	9	31	1026	1004	53	0.87
NMW2890	POWNA2717-12	JN893161	Herbarium	Caryophyllales	Amaranthaceae	Salicornia	Salicornia_dolichostachya	1990	rbcL	rbcLa-F	rbcLr590	562	27	8	35	527	4	5	523	522	60	6.23	0.76	0.95	99.24	99.05	574	25	34	59	515	5	11	510	504	55	10.28	0.97	2.14	99.03	97.86	560	1042	9	16	1033	1026	58	0.86
NMW2889	POWNA2535-12	JN892906	Herbarium	Caryophyllales	Amaranthaceae	Salicornia	Salicornia_dolichostachya	1991	rbcL	rbcLa-F	rbcLr590	570	42	5	47	523	10	28	513	495	57	8.25	1.91	5.35	98.09	94.65	572	1	43	44	528	12	18	516	510	57	7.69	2.27	3.41	97.73	96.59	590	1051	22	46	1029	1005	57	2.09
NMW744	POWNA633-10	JN890860	Herbarium	Caryophyllales	Amaranthaceae	Salicornia	Salicornia_europaea	1976	rbcL	rbcLa-F	rbcLr590	645	31	95	126	519	5	30	514	489	45	19.53	0.96	5.78	99.04	94.22	648	93	54	147	501	4	8	497	493	56	22.69	0.8	1.6	99.2	98.4	567	1020	9	38	1011	982	50	0.88
NMW2891	POWNA2718-12	JN893162	Herbarium	Caryophyllales	Amaranthaceae	Salicornia	Salicornia_europaea	1976	rbcL	rbcLa-F	rbcLr590	573	41	5	46	527	4	7	523	520	58	8.03	0.76	1.33	99.24	98.67	575	6	44	50	525	4	11	521	514	57	8.7	0.76	2.1	99.24	97.9	587	1052	8	18	1044	1034	58	0.76
NMW2892	POWNA2719-12	JN893163	Herbarium	Caryophyllales	Amaranthaceae	Salicornia	Salicornia_europaea	1976	rbcL	rbcLa-F	rbcLr590	566	30	13	43	523	4	4	519	519	60	7.6	0.76	0.76	99.24	99.24	567	10	34	44	523	4	5	519	518	60	7.76	0.76	0.96	99.24	99.04	569	1046	8	9	1038	1037	60	0.76
NMW746	POWNA634-10	JN890858	Herbarium	Caryophyllales	Amaranthaceae	Salicornia	Salicornia_fragilis	1989	rbcL	rbcLa-F	rbcLr590	562	25	16	41	521	7	22	514	499	48	7.3	1.34	4.22	98.66	95.78	564	22	25	47	517	4	6	513	511	59	8.33	0.77	1.16	99.23	98.84	561	1038	11	28	1027	1010	53	1.06
NMW1086	POWNA635-10	JN892676	Herbarium	Caryophyllales	Amaranthaceae	Salicornia	Salicornia_nitens	2008	rbcL	rbcLa-F	rbcLr590	642	24	94	118	524	6	22	518	502	48	18.38	1.15	4.2	98.85	95.8	559	19	29	48	511	4	6	507	505	59	8.59	0.78	1.17	99.22	98.83	564	1035	10	28	1025	1007	53	0.97
NMW745	POWNA636-10	JN890859	Herbarium	Caryophyllales	Amaranthaceae	Salicornia	Salicornia_pusilla	1990	rbcL	rbcLa-F	rbcLr590	618	28	68	96	522	4	31	518	491	46	15.53	0.77	5.94	99.23	94.06	645	92	38	130	515	4	10	511	505	57	20.16	0.78	1.94	99.22	98.06	567	1037	8	41	1029	996	52	0.77
NMW2894	POWNA2721-12	JN893165	Herbarium	Caryophyllales	Amaranthaceae	Salicornia	Salicornia_pusilla	1990	rbcL	rbcLa-F	rbcLr590	565	26	9	35	530	4	6	526	524	60	6.19	0.75	1.13	99.25	98.87	569	11	34	45	524	4	5	520	519	60	7.91	0.76	0.95	99.24	99.05	575	1054	8	11	1046	1043	60	0.76
NMW2893	POWNA2720-12	JN893164	Herbarium	Caryophyllales	Amaranthaceae	Salicornia	Salicornia_pusilla	1975	rbcL	rbcLa-F	rbcLr590	555	31	1	32	523	4	8	519	515	59	5.77	0.76	1.53	99.24	98.47	568	4	35	39	529	5	10	524	519	59	6.87	0.95	1.89	99.05	98.11	579	1052	9	18	1043	1034	59	0.86
NMW2895	POWNA2722-12	JN893166	Herbarium	Caryophyllales	Amaranthaceae	Salicornia	Salicornia_ramosissima	1990	rbcL	rbcLa-F	rbcLr590	330	118	148	266	64	10	28	54	36	31	80.61	15.63	43.75	84.38	56.25	573	4	84	88	485	4	8	481	477	53	15.36	0.82	1.65	99.18	98.35	485	549	14	36	535	513	50	2.55
NMW748	POWNA637-10	JN890862	Herbarium	Caryophyllales	Amaranthaceae	Salicornia	Salicornia_ramosissima	1976	rbcL	rbcLa-F	rbcLr590	561	27	17	44	517	7	30	510	487	46	7.84	1.35	5.8	98.65	94.2	566	22	34	56	510	4	5	506	505	58	9.89	0.78	0.98	99.22	99.02	560	1027	11	35	1016	992	52	1.07
NMW2896	POWNA2723-12	JN893167	Herbarium	Caryophyllales	Amaranthaceae	Salicornia	Salicornia_ramosissima	1990	rbcL	rbcLa-F	rbcLr590	567	31	9	40	527	4	6	523	521	59	7.05	0.76	1.14	99.24	98.86	571	16	33	49	522	4	7	518	515	59	8.58	0.77	1.34	99.23	98.66	571	1049	8	13	1041	1036	59	0.76
NMW2899	POWNA2715-12	JN893160	Herbarium	Caryophyllales	Amaranthaceae	Salsola	Salsola_kali	1995	rbcL	rbcLa-F	rbcLr590	678	44	112	156	522	9	40	513	482	44	23.01	1.72	7.66	98.28	92.34	569	13	99	112	457	9	49	448	408	42	19.68	1.97	10.72	98.03	89.28	578	979	18	89	961	890	43	1.84
NMW5304	POWNB109-10	JN893640	Fresh	Caryophyllales	Amaranthaceae	Salsola	Salsola_kali	2010	rbcL	rbcLa-F	rbcLr590	567	30	13	43	524	4	7	520	517	59	7.58	0.76	1.34	99.24	98.66	569	14	39	53	516	4	5	512	511	59	9.31	0.78	0.97	99.22	99.03	568	1040	8	12	1032	1028	59	0.77
NMW2898	POWNA2714-12	JN893159	Herbarium	Caryophyllales	Amaranthaceae	Salsola	Salsola_kali	1977	rbcL	rbcLa-F	rbcLr590	561	24	9	33	528	4	9	524	519	59	5.88	0.76	1.7	99.24	98.3	570	14	35	49	521	4	7	517	514	59	8.6	0.77	1.34	99.23	98.66	573	1049	8	16	1041	1033	59	0.76
NMW2897	POWNA2724-12	JN893168	Herbarium	Caryophyllales	Amaranthaceae	Salsola	Salsola_kali	1981	rbcL	rbcLa-F	rbcLr590	566	23	9	32	534	4	8	530	526	60	5.65	0.75	1.5	99.25	98.5	568	10	29	39	529	4	13	525	516	59	6.87	0.76	2.46	99.24	97.54	574	1063	8	21	1055	1042	59	0.75
NMW2900	POWNA1387-12	JN891223	Herbarium	Caryophyllales	Amaranthaceae	Sarcocornia	Sarcocornia_perennis	1953	rbcL	rbcLa-F	rbcLr590	578	86	29	115	463	7	25	456	438	52	19.9	1.51	5.4	98.49	94.6	573	83	86	169	404	41	123	363	281	34	29.49	10.15	30.45	89.85	69.55	486	867	48	148	819	719	44	5.54
NMW2901	POWNA1388-12	JN891224	Herbarium	Caryophyllales	Amaranthaceae	Sarcocornia	Sarcocornia_perennis	1952	rbcL	rbcLa-F	rbcLr590	567	28	11	39	528	4	11	524	517	60	6.88	0.76	2.08	99.24	97.92	570	0	34	34	536	4	12	532	524	59	5.96	0.75	2.24	99.25	97.76	585	1064	8	23	1056	1041	59	0.75
NMW771	POWNA739-10	JN893488	Herbarium	Caryophyllales	Amaranthaceae	Suaeda	Suaeda_maritima	1990	rbcL	rbcLa-F	rbcLr590	642	27	95	122	520	7	43	513	477	45	19	1.35	8.27	98.65	91.73	639	92	23	115	524	4	15	520	509	54	18	0.76	2.86	99.24	97.14	564	1044	11	58	1033	986	50	1.05
NMW2903	POWNA1386-12	JN891222	Herbarium	Caryophyllales	Amaranthaceae	Suaeda	Suaeda_maritima		rbcL	rbcLa-F	rbcLr590	575	46	34	80	495	4	11	491	484	54	13.91	0.81	2.22	99.19	97.78	575	6	44	50	525	4	11	521	514	58	8.7	0.76	2.1	99.24	97.9	558	1020	8	22	1012	998	56	0.78
NMW2902	POWNA1385-12	JN891221	Herbarium	Caryophyllales	Amaranthaceae	Suaeda	Suaeda_maritima	1986	rbcL	rbcLa-F	rbcLr590	577	42	9	51	526	4	10	522	516	59	8.84	0.76	1.9	99.24	98.1	576	3	47	50	526	4	7	522	519	58	8.68	0.76	1.33	99.24	98.67	583	1052	8	17	1044	1035	59	0.76
NMW770	POWNA740-10	JN893487	Herbarium	Caryophyllales	Amaranthaceae	Suaeda	Suaeda_vera	1999	rbcL	rbcLa-F	rbcLr590	629	33	80	113	516	5	24	511	492	47	17.97	0.97	4.65	99.03	95.35	651	97	53	150	501	4	11	497	490	56	23.04	0.8	2.2	99.2	97.8	566	1017	9	35	1008	982	51	0.88
NMW2905	POWNA1392-12	JN891228	Herbarium	Caryophyllales	Amaranthaceae	Suaeda	Suaeda_vera	1969	rbcL	rbcLa-F	rbcLr590	563	24	13	37	526	5	16	521	510	57	6.57	0.95	3.04	99.05	96.96	566	10	22	32	534	5	19	529	515	59	5.65	0.94	3.56	99.06	96.44	572	1060	10	35	1050	1025	58	0.94
NMW011	POWNA010-10	JN891531	Herbarium	Caryophyllales	Caryophyllaceae	Agrostemma	Agrostemma_githago	1992	rbcL	rbcLa-F	rbcLr590	637	26	90	116	521	6	32	515	489	45	18.21	1.15	6.14	98.85	93.86	723	173	35	208	515	5	28	510	487	47	28.77	0.97	5.44	99.03	94.56	566	1036	11	60	1025	976	46	1.06
NMW2739	POWNA1605-12	JN891550	Herbarium	Caryophyllales	Caryophyllaceae	Agrostemma	Agrostemma_githago	1992	rbcL	rbcLa-F	rbcLr590	567	19	6	25	542	4	13	538	529	59	4.41	0.74	2.4	99.26	97.6	573	15	26	41	532	4	13	528	519	59	7.16	0.75	2.44	99.25	97.56	577	1074	8	26	1066	1048	59	0.74
NMW2738	POWNA1606-12	JN891551	Herbarium	Caryophyllales	Caryophyllaceae	Agrostemma	Agrostemma_githago	2001	rbcL	rbcLa-F	rbcLr590	566	26	12	38	528	4	10	524	518	59	6.71	0.76	1.89	99.24	98.11	567	15	25	40	527	4	8	523	519	60	7.05	0.76	1.52	99.24	98.48	570	1055	8	18	1047	1037	59	0.76
NMW058	POWNA051-10	JN892413	Herbarium	Caryophyllales	Caryophyllaceae	Arenaria	Arenaria_serpyllifolia	1997	rbcL	rbcLa-F	rbcLr590	639	25	91	116	523	6	28	517	495	47	18.15	1.15	5.35	98.85	94.65	666	114	30	144	522	4	14	518	508	52	21.62	0.77	2.68	99.23	97.32	569	1045	10	42	1035	1003	50	0.96
NMW2741	POWNA2068-12	JN892223	Herbarium	Caryophyllales	Caryophyllaceae	Arenaria	Arenaria_serpyllifolia	1991	rbcL	rbcLa-F	rbcLr590	561	24	8	32	529	4	7	525	522	58	5.7	0.76	1.32	99.24	98.68	571	14	31	45	526	4	9	522	517	59	7.88	0.76	1.71	99.24	98.29	575	1055	8	16	1047	1039	59	0.76
NMW2740	POWNA2067-12	JN892222	Herbarium	Caryophyllales	Caryophyllaceae	Arenaria	Arenaria_serpyllifolia	1968	rbcL	rbcLa-F	rbcLr590	567	30	13	43	524	4	5	520	519	60	7.58	0.76	0.95	99.24	99.05	568	11	31	42	526	4	6	522	520	60	7.39	0.76	1.14	99.24	98.86	570	1050	8	11	1042	1039	60	0.76
NMW6410	POWNA2773-12	JN893252	Fresh	Caryophyllales	Caryophyllaceae	Arenaria	Arenaria_serpyllifolia	2011	rbcL	rbcLa-F	rbcLr590	560	24	11	35	525	4	10	521	515	55	6.25	0.76	1.9	99.24	98.1	569	11	27	38	531	4	8	527	523	59	6.68	0.75	1.51	99.25	98.49	573	1056	8	18	1048	1038	57	0.76
NMW2743	POWNA2070-12	JN890578	Herbarium	Caryophyllales	Caryophyllaceae	Cerastium	Cerastium_alpinum	1961	rbcL	rbcLa-F	rbcLr590	572	46	10	56	516	45	80	471	436	48	9.79	8.72	15.5	91.28	84.5	569	12	51	63	506	15	42	491	464	53	11.07	2.96	8.3	97.04	91.7	573	1022	60	122	962	900	51	5.87
NMW2744	POWNA2071-12	JN890579	Herbarium	Caryophyllales	Caryophyllaceae	Cerastium	Cerastium_alpinum	1959	rbcL	rbcLa-F	rbcLr590	568	51	13	64	504	10	43	494	461	48	11.27	1.98	8.53	98.02	91.47	566	14	19	33	533	5	17	528	516	57	5.83	0.94	3.19	99.06	96.81	569	1037	15	60	1022	977	52	1.45
NBGW7201	POWNA1321-12	JN891141	Fresh	Caryophyllales	Caryophyllaceae	Cerastium	Cerastium_alpinum	2010	rbcL	rbcLa-F	rbcLr590	697	20	142	162	535	4	10	531	525	57	23.24	0.75	1.87	99.25	98.13	568	11	20	31	537	4	12	533	525	59	5.46	0.74	2.23	99.26	97.77	579	1072	8	22	1064	1050	58	0.75
NMW924	POWNA894-10	JN891896	Herbarium	Caryophyllales	Caryophyllaceae	Cerastium	Cerastium_arcticum	1950	rbcL	rbcLa-F	rbcLr590	566	28	17	45	521	4	4	517	517	60	7.95	0.77	0.77	99.23	99.23	570	19	26	45	525	4	8	521	517	59	7.89	0.76	1.52	99.24	98.48	564	1046	8	12	1038	1034	60	0.76
NMW5108	POWNB034-10	JN890804	Fresh	Caryophyllales	Caryophyllaceae	Cerastium	Cerastium_arcticum	2010	rbcL	rbcLa-F	rbcLr590	565	26	13	39	526	4	11	522	515	59	6.9	0.76	2.09	99.24	97.91	569	16	28	44	525	4	6	521	519	59	7.73	0.76	1.14	99.24	98.86	567	1051	8	17	1043	1034	59	0.76
NMW2750	POWNA1901-12	JN892004	Herbarium	Caryophyllales	Caryophyllaceae	Cerastium	Cerastium_arvense	1943	rbcL	rbcLa-F	rbcLr590	572	43	1	44	528	6	21	522	507	57	7.69	1.14	3.98	98.86	96.02	575	5	64	69	506	4	8	502	498	57	12	0.79	1.58	99.21	98.42	591	1034	10	29	1024	1005	57	0.97
NMW2749	POWNA1016-12	JN892221	Herbarium	Caryophyllales	Caryophyllaceae	Cerastium	Cerastium_arvense	1956	rbcL	rbcLa-F	rbcLr590	576	45	8	53	523	34	106	489	417	40	9.2	6.5	20.27	93.5	79.73	572	10	57	67	505	22	78	483	427	45	11.71	4.36	15.45	95.64	84.55	579	1028	56	184	972	844	42	5.45
NMW193	POWNA160-10	JN892584	Herbarium	Caryophyllales	Caryophyllaceae	Cerastium	Cerastium_diffusum	1993	rbcL	rbcLa-F	rbcLr590	650	34	97	131	519	6	34	513	485	45	20.15	1.16	6.55	98.84	93.45	717	161	83	244	473	5	18	468	455	49	34.03	1.06	3.81	98.94	96.19	571	992	11	52	981	940	47	1.11
NMW2751	POWNA1900-12	JN892003	Herbarium	Caryophyllales	Caryophyllaceae	Cerastium	Cerastium_diffusum	1982	rbcL	rbcLa-F	rbcLr590	565	29	10	39	526	4	5	522	521	60	6.9	0.76	0.95	99.24	99.05	570	12	34	46	524	4	7	520	517	59	8.07	0.76	1.34	99.24	98.66	572	1050	8	12	1042	1038	60	0.76
NMW6491	POWNA1506-12	JN891412	Fresh	Caryophyllales	Caryophyllaceae	Cerastium	Cerastium_diffusum	2011	rbcL	rbcLa-F	rbcLr590	562	25	11	36	526	4	11	522	515	55	6.41	0.76	2.09	99.24	97.91	566	11	24	35	531	4	8	527	523	59	6.18	0.75	1.51	99.25	98.49	572	1057	8	19	1049	1038	57	0.76
NMW2752	POWNA1899-12	JN892002	Herbarium	Caryophyllales	Caryophyllaceae	Cerastium	Cerastium_diffusum	1996	rbcL	rbcLa-F	rbcLr590	568	24	14	38	530	4	8	526	522	59	6.69	0.75	1.51	99.25	98.49	571	2	30	32	539	4	16	535	523	58	5.6	0.74	2.97	99.26	97.03	578	1069	8	24	1061	1045	58	0.75
NMW2753	POWNA1898-12	JN892001	Herbarium	Caryophyllales	Caryophyllaceae	Cerastium	Cerastium_fontanum	1993	rbcL	rbcLa-F	rbcLr590	563	23	14	37	526	4	7	522	519	59	6.57	0.76	1.33	99.24	98.67	570	14	31	45	525	4	6	521	519	60	7.89	0.76	1.14	99.24	98.86	568	1051	8	13	1043	1038	59	0.76
NMW2754	POWNA1905-12	JN892007	Herbarium	Caryophyllales	Caryophyllaceae	Cerastium	Cerastium_fontanum	2000	rbcL	rbcLa-F	rbcLr590	566	29	8	37	529	4	4	525	525	59	6.54	0.76	0.76	99.24	99.24	568	10	27	37	531	4	9	527	522	59	6.51	0.75	1.69	99.25	98.31	577	1060	8	13	1052	1047	59	0.75
NMW1041	POWNA161-10	JN893675	Herbarium	Caryophyllales	Caryophyllaceae	Cerastium	Cerastium_fontanum	2000	rbcL	rbcLa-F	rbcLr590	553	21	13	34	519	4	13	515	506	52	6.15	0.77	2.5	99.23	97.5	558	17	15	32	526	4	18	522	508	52	5.73	0.76	3.42	99.24	96.58	567	1045	8	31	1037	1014	52	0.77
NMW196	POWNA162-10	JN892586	Herbarium	Caryophyllales	Caryophyllaceae	Cerastium	Cerastium_glomeratum	2000	rbcL	rbcLa-F	rbcLr590	666	24	122	146	520	4	28	516	492	46	21.92	0.77	5.38	99.23	94.62	660	112	20	132	528	4	19	524	509	49	20	0.76	3.6	99.24	96.4	567	1048	8	47	1040	1001	47	0.76
NMW2755	POWNA1904-12	JN892006	Herbarium	Caryophyllales	Caryophyllaceae	Cerastium	Cerastium_glomeratum	1984	rbcL	rbcLa-F	rbcLr590	562	23	13	36	526	12	23	514	503	55	6.41	2.28	4.37	97.72	95.63	571	21	30	51	520	11	21	509	499	56	8.93	2.12	4.04	97.88	95.96	561	1046	23	44	1023	1002	55	2.2
NMW6205	POWNA2982-12	JN893546	Fresh	Caryophyllales	Caryophyllaceae	Cerastium	Cerastium_glomeratum	2011	rbcL	rbcLa-F	rbcLr590	562	29	3	32	530	4	7	526	523	59	5.69	0.75	1.32	99.25	98.68	568	8	29	37	531	4	8	527	523	59	6.51	0.75	1.51	99.25	98.49	579	1061	8	15	1053	1046	59	0.75
NMW195	POWNA848-10	JN892589	Herbarium	Caryophyllales	Caryophyllaceae	Cerastium	Cerastium_pumilum	1951	rbcL	rbcLa-F	rbcLr506	471	33	11	44	427	14	19	413	408	56	9.34	3.28	4.45	96.72	95.55	489	12	49	61	428	14	21	414	407	54	12.47	3.27	4.91	96.73	95.09	486	855	28	40	827	815	55	3.27
NMW2758	POWNA1897-12	JN892000	Herbarium	Caryophyllales	Caryophyllaceae	Cerastium	Cerastium_pumilum	1975	rbcL	rbcLa-F	rbcLr590	574	50	8	58	516	4	6	512	510	60	10.1	0.78	1.16	99.22	98.84	576	4	49	53	523	4	9	519	514	59	9.2	0.76	1.72	99.24	98.28	583	1039	8	15	1031	1024	60	0.77
NMW2757	POWNA1902-12	JN892005	Herbarium	Caryophyllales	Caryophyllaceae	Cerastium	Cerastium_pumilum	1991	rbcL	rbcLa-F	rbcLr590	567	29	14	43	524	4	6	520	518	59	7.58	0.76	1.15	99.24	98.85	568	14	28	42	526	4	5	522	521	60	7.39	0.76	0.95	99.24	99.05	569	1050	8	11	1042	1039	59	0.76
NMW194	POWNA163-10	JN892588	Herbarium	Caryophyllales	Caryophyllaceae	Cerastium	Cerastium_semidecandrum	1996	rbcL	rbcLa-F	rbcLr590	641	33	90	123	518	6	45	512	473	43	19.19	1.16	8.69	98.84	91.31	741	184	61	245	496	9	61	487	435	42	33.06	1.81	12.3	98.19	87.7	571	1014	15	106	999	908	42	1.48
NMW2759	POWNA1896-12	JN891999	Herbarium	Caryophyllales	Caryophyllaceae	Cerastium	Cerastium_semidecandrum	1993	rbcL	rbcLa-F	rbcLr590	568	119	9	128	440	4	11	436	429	56	22.54	0.91	2.5	99.09	97.5	568	11	31	42	526	11	37	515	489	55	7.39	2.09	7.03	97.91	92.97	575	966	15	48	951	918	55	1.55
NMW265	POWNA222-10	JN892039	Herbarium	Caryophyllales	Caryophyllaceae	Dianthus	Dianthus_armeria	2003	rbcL	rbcLa-F	rbcLr590	644	26	99	125	519	5	21	514	498	46	19.41	0.96	4.05	99.04	95.95	639	86	23	109	530	4	12	526	518	54	17.06	0.75	2.26	99.25	97.74	568	1049	9	33	1040	1016	50	0.86
NMW2761	POWNA2385-12	JN892689	Herbarium	Caryophyllales	Caryophyllaceae	Dianthus	Dianthus_armeria	1997	rbcL	rbcLa-F	rbcLr590	569	33	5	38	531	4	6	527	525	60	6.68	0.75	1.13	99.25	98.87	571	11	35	46	525	4	7	521	518	59	8.06	0.76	1.33	99.24	98.67	579	1056	8	13	1048	1043	60	0.76
NMW2762	POWNA2383-12	JN892687	Herbarium	Caryophyllales	Caryophyllaceae	Dianthus	Dianthus_armeria	2002	rbcL	rbcLa-F	rbcLr590	553	17	1	18	535	4	9	531	526	59	3.25	0.75	1.68	99.25	98.32	574	3	33	36	538	8	19	530	519	58	6.27	1.49	3.53	98.51	96.47	580	1073	12	28	1061	1045	59	1.12
NMW266	POWNA223-10	JN892040	Herbarium	Caryophyllales	Caryophyllaceae	Dianthus	Dianthus_deltoides	1952	rbcL	rbcLa-F	rbcLr590	644	95	85	180	464	8	36	456	428	43	27.95	1.72	7.76	98.28	92.24	643	101	109	210	433	8	27	425	406	43	32.66	1.85	6.24	98.15	93.76	575	897	16	63	881	834	43	1.78
NMW2764	POWNA2388-12	JN892692	Herbarium	Caryophyllales	Caryophyllaceae	Dianthus	Dianthus_deltoides	1990	rbcL	rbcLa-F	rbcLr590	565	32	10	42	523	4	5	519	518	60	7.43	0.76	0.96	99.24	99.04	575	7	60	67	508	9	39	499	469	50	11.65	1.77	7.68	98.23	92.32	577	1031	13	44	1018	987	55	1.26
NMW2763	POWNA2384-12	JN892688	Herbarium	Caryophyllales	Caryophyllaceae	Dianthus	Dianthus_deltoides	1913	rbcL	rbcLa-F	rbcLajf634R	618	22	1	23	595	7	20	588	575	49	3.72	1.18	3.36	98.82	96.64	626	13	28	41	585	4	10	581	575	59	6.55	0.68	1.71	99.32	98.29	641	1180	11	30	1169	1150	54	0.93
NMW427	POWNA358-10	JN892526	Herbarium	Caryophyllales	Caryophyllaceae	Honckenya	Honckenya_peploides	1983	rbcL	rbcLa-F	rbcLr590	640	31	92	123	517	4	28	513	489	47	19.22	0.77	5.42	99.23	94.58	655	103	53	156	499	5	23	494	476	49	23.82	1	4.61	99	95.39	567	1016	9	51	1007	965	48	0.89
NMW2766	POWNA2386-12	JN892690	Herbarium	Caryophyllales	Caryophyllaceae	Honckenya	Honckenya_peploides	1985	rbcL	rbcLa-F	rbcLr590	564	24	14	38	526	4	7	522	519	59	6.74	0.76	1.33	99.24	98.67	572	12	36	48	524	4	8	520	516	59	8.39	0.76	1.53	99.24	98.47	570	1050	8	15	1042	1035	59	0.76
NBGW6046	POWNB166-10	JN893555	Fresh	Caryophyllales	Caryophyllaceae	Honckenya	Honckenya_peploides	2010	rbcL	rbcLa-F	rbcLr590	562	25	15	40	522	4	5	518	517	58	7.12	0.77	0.96	99.23	99.04	567	20	26	46	521	4	7	517	514	59	8.11	0.77	1.34	99.23	98.66	563	1043	8	12	1035	1031	58	0.77
NMW6414	POWNA2777-12	JN893256	Fresh	Caryophyllales	Caryophyllaceae	Honckenya	Honckenya_peploides	2011	rbcL	rbcLa-F	rbcLr590	562	14	2	16	546	4	16	542	530	56	2.85	0.73	2.93	99.27	97.07	568	12	27	39	529	4	9	525	520	59	6.87	0.76	1.7	99.24	98.3	579	1075	8	25	1067	1050	57	0.74
NMW2771	POWNA2240-12	JN892474	Herbarium	Caryophyllales	Caryophyllaceae	Minuartia	Minuartia_hybrida	1944	rbcL	rbcLa-F	rbcLr590	567	31	12	43	524	5	21	519	503	51	7.58	0.95	4.01	99.05	95.99	569	13	35	48	521	4	5	517	516	60	8.44	0.77	0.96	99.23	99.04	571	1045	9	26	1036	1019	55	0.86
NMW2772	POWNA2243-12	JN892477	Herbarium	Caryophyllales	Caryophyllaceae	Minuartia	Minuartia_hybrida	1972	rbcL	rbcLa-F	rbcLr590	565	29	13	42	523	8	31	515	492	49	7.43	1.53	5.93	98.47	94.07	568	13	32	45	523	4	6	519	517	59	7.92	0.76	1.15	99.24	98.85	569	1046	12	37	1034	1009	54	1.15
NMW2773	POWNA2242-12	JN892476	Herbarium	Caryophyllales	Caryophyllaceae	Minuartia	Minuartia_hybrida	1983	rbcL	rbcLa-F	rbcLr590	566	28	14	42	524	4	5	520	519	60	7.42	0.76	0.95	99.24	99.05	569	12	31	43	526	4	9	522	517	59	7.56	0.76	1.71	99.24	98.29	569	1050	8	14	1042	1036	59	0.76
NMW550	POWNA477-10	JN893437	Herbarium	Caryophyllales	Caryophyllaceae	Minuartia	Minuartia_verna	1969	rbcL	rbcLa-F	rbcLr590	638	107	81	188	450	9	40	441	410	44	29.47	2	8.89	98	91.11	721	175	134	309	412	5	15	407	397	46	42.86	1.21	3.64	98.79	96.36	575	862	14	55	848	807	45	1.62
NMW2774	POWNA2237-12	JN892471	Herbarium	Caryophyllales	Caryophyllaceae	Minuartia	Minuartia_verna	1964	rbcL	rbcLa-F	rbcLr590	569	31	12	43	526	5	17	521	509	53	7.56	0.95	3.23	99.05	96.77	570	12	31	43	527	4	10	523	517	59	7.54	0.76	1.9	99.24	98.1	573	1053	9	27	1044	1026	56	0.85
NMW2775	POWNA2236-12	JN892470	Herbarium	Caryophyllales	Caryophyllaceae	Minuartia	Minuartia_verna	1975	rbcL	rbcLa-F	rbcLr590	573	34	7	41	532	5	7	527	525	60	7.16	0.94	1.32	99.06	98.68	565	3	29	32	533	4	9	529	524	59	5.66	0.75	1.69	99.25	98.31	585	1065	9	16	1056	1049	59	0.85
NMW552	POWNA479-10	JN893436	Herbarium	Caryophyllales	Caryophyllaceae	Moehringia	Moehringia_trinervia	1993	rbcL	rbcLa-F	rbcLr590	648	30	100	130	518	6	23	512	495	46	20.06	1.16	4.44	98.84	95.56	646	98	27	125	521	4	17	517	504	52	19.35	0.77	3.26	99.23	96.74	566	1039	10	40	1029	999	49	0.96
NMW2777	POWNA2238-12	JN892472	Herbarium	Caryophyllales	Caryophyllaceae	Moehringia	Moehringia_trinervia	1964	rbcL	rbcLa-F	rbcLr590	571	49	0	49	522	4	11	518	511	55	8.58	0.77	2.11	99.23	97.89	573	10	43	53	520	4	8	516	512	59	9.25	0.77	1.54	99.23	98.46	586	1042	8	19	1034	1023	57	0.77
NMW2776	POWNA2239-12	JN892473	Herbarium	Caryophyllales	Caryophyllaceae	Moehringia	Moehringia_trinervia	2003	rbcL	rbcLa-F	rbcLr590	570	30	11	41	529	4	12	525	517	54	7.19	0.76	2.27	99.24	97.73	568	13	25	38	530	4	10	526	520	58	6.69	0.75	1.89	99.25	98.11	574	1059	8	22	1051	1037	56	0.76
NMW6392	POWNA1351-12	JN891187	Fresh	Caryophyllales	Caryophyllaceae	Moehringia	Moehringia_trinervia	2011	rbcL	rbcLa-F	rbcLr590	564	27	13	40	524	4	7	520	517	55	7.09	0.76	1.34	99.24	98.66	566	10	24	34	532	4	10	528	522	59	6.01	0.75	1.88	99.25	98.12	572	1056	8	17	1048	1039	57	0.76
NMW2778	POWNA2245-12	JN892479	Herbarium	Caryophyllales	Caryophyllaceae	Moenchia	Moenchia_erecta	1994	rbcL	rbcLa-F	rbcLr590	573	36	4	40	533	4	7	529	526	59	6.98	0.75	1.31	99.25	98.69	568	10	29	39	529	4	6	525	523	60	6.87	0.76	1.13	99.24	98.87	581	1062	8	13	1054	1049	59	0.75
NMW2779	POWNA2244-12	JN892478	Herbarium	Caryophyllales	Caryophyllaceae	Moenchia	Moenchia_erecta	1987	rbcL	rbcLa-F	rbcLr590	568	30	14	44	524	4	22	520	502	52	7.75	0.76	4.2	99.24	95.8	568	11	27	38	530	4	8	526	522	59	6.69	0.75	1.51	99.25	98.49	571	1054	8	30	1046	1024	56	0.76
NMW561	POWNA488-10	JN890812	Herbarium	Caryophyllales	Caryophyllaceae	Myosoton	Myosoton_aquaticum	2003	rbcL	rbcLa-F	rbcLr590	681	23	143	166	515	5	30	510	485	46	24.38	0.97	5.83	99.03	94.17	720	168	51	219	501	5	20	496	481	46	30.42	1	3.99	99	96.01	568	1016	10	50	1006	966	46	0.98
NMW2782	POWNA2731-12	JN893175	Herbarium	Caryophyllales	Caryophyllaceae	Myosoton	Myosoton_aquaticum	1991	rbcL	rbcLa-F	rbcLr590	572	34	6	40	532	4	8	528	524	59	6.99	0.75	1.5	99.25	98.5	572	11	31	42	530	4	5	526	525	59	7.34	0.75	0.94	99.25	99.06	579	1062	8	13	1054	1049	59	0.75
NMW2781	POWNA2730-12	JN893174	Herbarium	Caryophyllales	Caryophyllaceae	Myosoton	Myosoton_aquaticum	1986	rbcL	rbcLa-F	rbcLr590	561	24	9	33	528	4	10	524	518	56	5.88	0.76	1.89	99.24	98.11	567	11	25	36	531	4	9	527	522	58	6.35	0.75	1.69	99.25	98.31	575	1059	8	19	1051	1040	57	0.76
NMW865	POWNA626-10	JN892147	Herbarium	Caryophyllales	Caryophyllaceae	Sagina	Sagina_apetala	1987	rbcL	rbcLa-F	rbcLr590	636	97	79	176	460	12	47	448	413	42	27.67	2.61	10.22	97.39	89.78	562	26	112	138	424	26	99	398	325	36	24.56	6.13	23.35	93.87	76.65	565	884	38	146	846	738	39	4.3
NMW2783	POWNA2732-12	JN893176	Herbarium	Caryophyllales	Caryophyllaceae	Sagina	Sagina_apetala	2002	rbcL	rbcLa-F	rbcLr590	570	27	9	36	534	4	10	530	524	60	6.32	0.75	1.87	99.25	98.13	569	4	35	39	530	7	12	523	518	59	6.85	1.32	2.26	98.68	97.74	581	1064	11	22	1053	1042	59	1.03
NMW2784	POWNA2727-12	JN893171	Herbarium	Caryophyllales	Caryophyllaceae	Sagina	Sagina_apetala	1985	rbcL	rbcLa-F	rbcLr590	568	29	1	30	538	4	13	534	525	59	5.28	0.74	2.42	99.26	97.58	568	9	29	38	530	4	10	526	520	58	6.69	0.75	1.89	99.25	98.11	584	1068	8	23	1060	1045	59	0.75
NMW6357	POWNA1004-12	JN890673	Fresh	Caryophyllales	Caryophyllaceae	Sagina	Sagina_apetala	2011	rbcL	rbcLa-F	rbcLr590	563	27	8	35	528	4	7	524	521	55	6.22	0.76	1.33	99.24	98.67	565	11	26	37	528	4	9	524	519	59	6.55	0.76	1.7	99.24	98.3	575	1056	8	16	1048	1040	57	0.76
NMW738	POWNA627-10	JN892547	Herbarium	Caryophyllales	Caryophyllaceae	Sagina	Sagina_maritima	1991	rbcL	rbcLa-F	rbcLr590	636	74	83	157	479	7	33	472	446	44	24.69	1.46	6.89	98.54	93.11	648	100	135	235	413	7	45	406	368	41	36.27	1.69	10.9	98.31	89.1	572	892	14	78	878	814	43	1.57
NMW2785	POWNA2728-12	JN893172	Herbarium	Caryophyllales	Caryophyllaceae	Sagina	Sagina_maritima	1978	rbcL	rbcLa-F	rbcLr590	573	35	5	40	533	4	8	529	525	60	6.98	0.75	1.5	99.25	98.5	574	2	35	37	537	5	13	532	524	59	6.45	0.93	2.42	99.07	97.58	590	1070	9	21	1061	1049	59	0.84
NMW740	POWNA628-10	JN890856	Herbarium	Caryophyllales	Caryophyllaceae	Sagina	Sagina_nodosa	1984	rbcL	rbcLa-F	rbcLr590	639	31	92	123	516	7	37	509	479	43	19.25	1.36	7.17	98.64	92.83	735	181	75	256	479	6	23	473	456	46	34.83	1.25	4.8	98.75	95.2	569	995	13	60	982	935	45	1.31
NMW2787	POWNA2729-12	JN893173	Herbarium	Caryophyllales	Caryophyllaceae	Sagina	Sagina_nodosa	1970	rbcL	rbcLa-F	rbcLr590	571	34	5	39	532	4	11	528	521	60	6.83	0.75	2.07	99.25	97.93	573	12	38	50	523	4	9	519	514	59	8.73	0.76	1.72	99.24	98.28	580	1055	8	20	1047	1035	59	0.76
NMW2788	POWNA2725-12	JN893169	Herbarium	Caryophyllales	Caryophyllaceae	Sagina	Sagina_nodosa	1997	rbcL	rbcLa-F	rbcLr590	567	24	4	28	539	4	9	535	530	59	4.94	0.74	1.67	99.26	98.33	571	9	32	41	530	4	9	526	521	59	7.18	0.75	1.7	99.25	98.3	581	1069	8	18	1061	1051	59	0.75
NMW742	POWNA629-10	JN890854	Herbarium	Caryophyllales	Caryophyllaceae	Sagina	Sagina_procumbens	2001	rbcL	rbcLa-F	rbcLr590	641	26	96	122	519	5	32	514	487	45	19.03	0.96	6.17	99.04	93.83	683	130	35	165	518	4	14	514	504	52	24.16	0.77	2.7	99.23	97.3	567	1037	9	46	1028	991	49	0.87
NMW2790	POWNA2555-12	JN892925	Herbarium	Caryophyllales	Caryophyllaceae	Sagina	Sagina_procumbens	2003	rbcL	rbcLa-F	rbcLr590	566	30	5	35	531	4	6	527	525	60	6.18	0.75	1.13	99.25	98.87	572	11	35	46	526	4	7	522	519	59	8.04	0.76	1.33	99.24	98.67	580	1057	8	13	1049	1044	60	0.76
NMW2789	POWNA2726-12	JN893170	Herbarium	Caryophyllales	Caryophyllaceae	Sagina	Sagina_procumbens	2003	rbcL	rbcLa-F	rbcLr590	567	32	7	39	528	4	8	524	520	59	6.88	0.76	1.52	99.24	98.48	568	3	23	26	542	10	20	532	522	59	4.58	1.85	3.69	98.15	96.31	582	1070	14	28	1056	1042	59	1.31
NMW741	POWNA630-10	JN892487	Herbarium	Caryophyllales	Caryophyllaceae	Sagina	Sagina_subulata	1997	rbcL	rbcLa-F	rbcLr590	732	34	179	213	519	7	48	512	471	43	29.1	1.35	9.25	98.65	90.75	765	214	89	303	462	5	25	457	437	46	39.61	1.08	5.41	98.92	94.59	575	981	12	73	969	908	45	1.22
NMW2791	POWNA2554-12	JN892924	Herbarium	Caryophyllales	Caryophyllaceae	Sagina	Sagina_subulata	1975	rbcL	rbcLa-F	rbcLr590	575	67	2	69	506	7	23	499	483	50	12	1.38	4.55	98.62	95.45	572	40	64	104	468	62	154	406	314	33	18.18	13.25	32.91	86.75	67.09	551	974	69	177	905	797	42	7.08
NMW2792	POWNA2553-12	JN892923	Herbarium	Caryophyllales	Caryophyllaceae	Sagina	Sagina_subulata	1979	rbcL	rbcLa-F	rbcLr590	573	39	3	42	531	10	18	521	513	58	7.33	1.88	3.39	98.12	96.61	568	12	30	42	526	4	8	522	518	59	7.39	0.76	1.52	99.24	98.48	579	1057	14	26	1043	1031	59	1.32
NMW767	POWNA876-10	JN893723	Herbarium	Caryophyllales	Caryophyllaceae	Saponaria	Saponaria_officinalis	1982	rbcL	rbcLa-F	rbcLr506	599	33	139	172	427	15	42	412	385	52	28.71	3.51	9.84	96.49	90.16	565	92	43	135	430	18	48	412	382	51	23.89	4.19	11.16	95.81	88.84	487	857	33	90	824	767	51	3.85
NMW2794	POWNA2551-12	JN892921	Herbarium	Caryophyllales	Caryophyllaceae	Saponaria	Saponaria_officinalis	1988	rbcL	rbcLa-F	rbcLr590	573	40	3	43	530	4	7	526	523	60	7.5	0.75	1.32	99.25	98.68	569	13	35	48	521	6	15	515	506	60	8.44	1.15	2.88	98.85	97.12	579	1051	10	22	1041	1029	60	0.95
NMW2793	POWNA2552-12	JN892922	Herbarium	Caryophyllales	Caryophyllaceae	Saponaria	Saponaria_officinalis	1973	rbcL	rbcLa-F	rbcLr590	567	30	14	44	523	15	45	508	478	47	7.76	2.87	8.6	97.13	91.4	567	15	31	46	521	4	8	517	513	59	8.11	0.77	1.54	99.23	98.46	568	1044	19	53	1025	991	53	1.82
NMW853	POWNA878-10	JN892793	Herbarium	Caryophyllales	Caryophyllaceae	Scleranthus	Scleranthus_annuus	1985	rbcL	rbcLa-F	rbcLr506	526	68	70	138	388	5	7	383	381	56	26.24	1.29	1.8	98.71	98.2	544	76	76	152	392	4	16	388	376	54	27.94	1.02	4.08	98.98	95.92	488	780	9	23	771	757	55	1.15
NMW2795	POWNA2550-12	JN892920	Herbarium	Caryophyllales	Caryophyllaceae	Scleranthus	Scleranthus_annuus	1999	rbcL	rbcLa-F	rbcLr590	574	43	5	48	526	4	6	522	520	60	8.36	0.76	1.14	99.24	98.86	576	12	45	57	519	4	6	515	513	60	9.9	0.77	1.16	99.23	98.84	578	1045	8	12	1037	1033	60	0.77
NMW2796	POWNA2549-12	JN892919	Herbarium	Caryophyllales	Caryophyllaceae	Scleranthus	Scleranthus_annuus	1980	rbcL	rbcLa-F	rbcLr590	562	42	15	57	505	16	41	489	464	48	10.14	3.17	8.12	96.83	91.88	570	10	29	39	531	9	18	522	513	58	6.84	1.69	3.39	98.31	96.61	571	1036	25	59	1011	977	53	2.41
NMW2799	POWNA2546-12	JN892916	Herbarium	Caryophyllales	Caryophyllaceae	Scleranthus	Scleranthus_perennis	1955	rbcL	rbcLa-F	rbcLr590	565	27	13	40	525	6	24	519	501	52	7.08	1.14	4.57	98.86	95.43	569	15	32	47	522	4	6	518	516	59	8.26	0.77	1.15	99.23	98.85	569	1047	10	30	1037	1017	56	0.96
NMW2798	POWNA2547-12	JN892917	Herbarium	Caryophyllales	Caryophyllaceae	Scleranthus	Scleranthus_perennis	1923	rbcL	rbcLa-F	rbcLa-R	579	39	0	39	540	3	6	537	534	58	6.74	0.56	1.11	99.44	98.89	583	1	43	44	539	4	9	535	530	59	7.55	0.74	1.67	99.26	98.33	602	1079	7	15	1072	1064	59	0.65
NMW2797	POWNA2548-12	JN892918	Herbarium	Caryophyllales	Caryophyllaceae	Scleranthus	Scleranthus_perennis	1962	rbcL	rbcLa-F	rbcLr590	564	27	14	41	523	10	41	513	482	48	7.27	1.91	7.84	98.09	92.16	568	10	26	36	532	4	15	528	517	59	6.34	0.75	2.82	99.25	97.18	572	1055	14	56	1041	999	54	1.33
NMW2800	POWNA1581-12	JN891509	Herbarium	Caryophyllales	Caryophyllaceae	Silene	Silene_acaulis	1942	rbcL	rbcLa-F	rbcLr590	569	60	6	66	503	8	34	495	469	46	11.6	1.59	6.76	98.41	93.24	578	11	64	75	503	6	27	497	476	48	12.98	1.19	5.37	98.81	94.63	579	1006	14	61	992	945	47	1.39
NMW2802	POWNA1579-12	JN891507	Herbarium	Caryophyllales	Caryophyllaceae	Silene	Silene_acaulis	1932	rbcL	rbcLa-F	rbcLr590	571	34	11	45	526	16	40	510	486	52	7.88	3.04	7.6	96.96	92.4	574	14	41	55	519	17	41	502	478	53	9.58	3.28	7.9	96.72	92.1	575	1045	33	81	1012	964	52	3.16
NMW2801	POWNA1580-12	JN891508	Herbarium	Caryophyllales	Caryophyllaceae	Silene	Silene_acaulis	1962	rbcL	rbcLa-F	rbcLr590	564	88	10	98	466	4	4	462	462	59	17.38	0.86	0.86	99.14	99.14	566	14	27	41	525	6	19	519	506	57	7.24	1.14	3.62	98.86	96.38	570	991	10	23	981	968	58	1.01
NMW5081	POWNB027-10	JN892031	Fresh	Caryophyllales	Caryophyllaceae	Silene	Silene_acaulis	2010	rbcL	rbcLa-F	rbcLr590	562	22	14	36	526	4	12	522	514	59	6.41	0.76	2.28	99.24	97.72	566	13	24	37	529	4	11	525	518	59	6.54	0.76	2.08	99.24	97.92	572	1055	8	23	1047	1032	59	0.76
NMW723	POWNA679-10	JN892750	Herbarium	Caryophyllales	Caryophyllaceae	Silene	Silene_conica	1982	rbcL	rbcLa-F	rbcLr590	640	56	80	136	504	8	39	496	465	44	21.25	1.59	7.74	98.41	92.26	652	98	90	188	464	5	16	459	448	47	28.83	1.08	3.45	98.92	96.55	583	968	13	55	955	913	46	1.34
NMW2803	POWNA1578-12	JN891506	Herbarium	Caryophyllales	Caryophyllaceae	Silene	Silene_conica	1991	rbcL	rbcLa-F	rbcLr590	569	32	5	37	532	4	8	528	524	60	6.5	0.75	1.5	99.25	98.5	570	10	36	46	524	4	9	520	515	60	8.07	0.76	1.72	99.24	98.28	580	1056	8	17	1048	1039	60	0.76
NMW2804	POWNA1584-12	JN891512	Herbarium	Caryophyllales	Caryophyllaceae	Silene	Silene_conica	1968	rbcL	rbcLa-F	rbcLr590	563	26	14	40	523	5	7	518	516	58	7.1	0.96	1.34	99.04	98.66	569	16	26	42	527	4	8	523	519	59	7.38	0.76	1.52	99.24	98.48	567	1050	9	15	1041	1035	58	0.86
NMW2807	POWNA1582-12	JN891510	Herbarium	Caryophyllales	Caryophyllaceae	Silene	Silene_dioica	1969	rbcL	rbcLa-F	rbcLr590	573	43	5	48	525	4	5	521	520	58	8.38	0.76	0.95	99.24	99.05	572	8	41	49	523	4	7	519	516	59	8.57	0.76	1.34	99.24	98.66	582	1048	8	12	1040	1036	59	0.76
NBGW6036	POWNB161-10	JN893318	Fresh	Caryophyllales	Caryophyllaceae	Silene	Silene_dioica	2010	rbcL	rbcLa-F	rbcLr590	562	25	13	38	524	4	7	520	517	59	6.76	0.76	1.34	99.24	98.66	566	15	31	46	520	4	4	516	516	60	8.13	0.77	0.77	99.23	99.23	567	1044	8	11	1036	1033	59	0.77
NMW2805	POWNA1583-12	JN891511	Herbarium	Caryophyllales	Caryophyllaceae	Silene	Silene_dioica	1974	rbcL	rbcLa-F	rbcLr590	567	29	4	33	534	4	8	530	526	58	5.82	0.75	1.5	99.25	98.5	568	11	32	43	525	4	10	521	515	59	7.57	0.76	1.9	99.24	98.1	581	1059	8	18	1051	1041	58	0.76
NBGW6002	POWNB212-10	JN892599	Fresh	Caryophyllales	Caryophyllaceae	Silene	Silene_dioica	2010	rbcL	rbcLa-F	rbcLr590	565	24	15	39	526	4	7	522	519	59	6.9	0.76	1.33	99.24	98.67	568	12	26	38	530	4	8	526	522	59	6.69	0.75	1.51	99.25	98.49	571	1056	8	15	1048	1041	59	0.76
NBGW3001	POWNA445-10	JN893480	Fresh	Caryophyllales	Caryophyllaceae	Silene	Silene_flos-cuculi	2008	rbcL	rbcLa-F	rbcLr590	618	22	73	95	523	4	13	519	510	54	15.37	0.76	2.49	99.24	97.51	628	81	39	120	508	17	32	491	476	50	19.11	3.35	6.3	96.65	93.7	566	1031	21	45	1010	986	52	2.04
NMW2768	POWNA2389-12	JN892693	Herbarium	Caryophyllales	Caryophyllaceae	Silene	Silene_flos-cuculi	1962	rbcL	rbcLa-F	rbcLr590	573	44	2	46	527	4	8	523	519	59	8.03	0.76	1.52	99.24	98.48	573	10	47	57	516	4	6	512	510	60	9.95	0.78	1.16	99.22	98.84	579	1043	8	14	1035	1029	59	0.77
NBGW7260	POWNA1654-12	JN891656	Fresh	Caryophyllales	Caryophyllaceae	Silene	Silene_flos-cuculi	2011	rbcL	rbcLa-F	rbcLr590	562	28	2	30	532	4	7	528	525	59	5.34	0.75	1.32	99.25	98.68	570	17	25	42	528	4	7	524	521	59	7.37	0.76	1.33	99.24	98.67	578	1060	8	14	1052	1046	59	0.75
NMW2767	POWNA2387-12	JN892691	Herbarium	Caryophyllales	Caryophyllaceae	Silene	Silene_flos-cuculi	2005	rbcL	rbcLa-F	rbcLr590	562	25	6	31	531	4	17	527	514	52	5.52	0.75	3.2	99.25	96.8	570	10	29	39	531	4	10	527	521	59	6.84	0.75	1.88	99.25	98.12	576	1062	8	27	1054	1035	55	0.75
NMW724	POWNA680-10	JN892746	Herbarium	Caryophyllales	Caryophyllaceae	Silene	Silene_gallica	1987	rbcL	rbcLa-F	rbcLr590	667	29	117	146	521	5	27	516	494	47	21.89	0.96	5.18	99.04	94.82	668	118	72	190	478	5	29	473	449	44	28.44	1.05	6.07	98.95	93.93	570	999	10	56	989	943	45	1
NMW2809	POWNA1585-12	JN891513	Herbarium	Caryophyllales	Caryophyllaceae	Silene	Silene_gallica	1974	rbcL	rbcLa-F	rbcLr590	565	30	23	53	512	8	23	504	489	50	9.38	1.56	4.49	98.44	95.51	568	23	27	50	518	4	18	514	500	51	8.8	0.77	3.47	99.23	96.53	548	1030	12	41	1018	989	50	1.17
NMW2808	POWNA1586-12	JN891514	Herbarium	Caryophyllales	Caryophyllaceae	Silene	Silene_gallica	1988	rbcL	rbcLa-F	rbcLr590	567	33	3	36	531	4	11	527	520	56	6.35	0.75	2.07	99.25	97.93	568	14	30	44	524	4	10	520	514	56	7.75	0.76	1.91	99.24	98.09	576	1055	8	21	1047	1034	56	0.76
NMW725	POWNA681-10	JN892745	Herbarium	Caryophyllales	Caryophyllaceae	Silene	Silene_latifolia	1985	rbcL	rbcLa-F	rbcLr590	633	100	74	174	459	7	33	452	426	44	27.49	1.53	7.19	98.47	92.81	631	103	164	267	364	17	84	347	280	35	42.31	4.67	23.08	95.33	76.92	554	823	24	117	799	706	40	2.92
NMW2811	POWNA1710-12	JN891734	Herbarium	Caryophyllales	Caryophyllaceae	Silene	Silene_latifolia	1966	rbcL	rbcLa-F	rbcLr590	574	46	8	54	520	4	9	516	511	58	9.41	0.77	1.73	99.23	98.27	572	12	39	51	521	4	8	517	513	59	8.92	0.77	1.54	99.23	98.46	576	1041	8	17	1033	1024	59	0.77
NMW2810	POWNA1709-12	JN891733	Herbarium	Caryophyllales	Caryophyllaceae	Silene	Silene_latifolia	1978	rbcL	rbcLa-F	rbcLr590	568	28	13	41	527	6	13	521	514	55	7.22	1.14	2.47	98.86	97.53	570	13	25	38	532	4	11	528	521	59	6.67	0.75	2.07	99.25	97.93	573	1059	10	24	1049	1035	57	0.94
NMW5262	POWNB104-10	JN890613	Fresh	Caryophyllales	Caryophyllaceae	Silene	Silene_latifolia	2010	rbcL	rbcLa-F	rbcLr590	569	27	20	47	522	4	8	518	514	58	8.26	0.77	1.53	99.23	98.47	566	16	21	37	529	4	11	525	518	59	6.54	0.76	2.08	99.24	97.92	565	1051	8	19	1043	1032	59	0.76
NMW726	POWNA682-10	JN892748	Herbarium	Caryophyllales	Caryophyllaceae	Silene	Silene_noctiflora	2002	rbcL	rbcLa-F	rbcLr590	886	31	333	364	522	4	13	518	509	53	41.08	0.77	2.49	99.23	97.51	648	93	30	123	525	4	9	521	516	57	18.98	0.76	1.71	99.24	98.29	572	1047	8	22	1039	1025	55	0.76
NMW2813	POWNA1711-12	JN891735	Herbarium	Caryophyllales	Caryophyllaceae	Silene	Silene_noctiflora	1988	rbcL	rbcLa-F	rbcLr590	561	24	9	33	528	5	10	523	518	56	5.88	0.95	1.89	99.05	98.11	567	12	26	38	529	4	9	525	520	59	6.7	0.76	1.7	99.24	98.3	574	1057	9	19	1048	1038	57	0.85
NMW727	POWNA683-10	JN892747	Herbarium	Caryophyllales	Caryophyllaceae	Silene	Silene_nutans	1972	rbcL	rbcLa-F	rbcLr590	635	78	77	155	480	10	44	470	436	43	24.41	2.08	9.17	97.92	90.83	724	178	135	313	411	7	32	404	379	40	43.23	1.7	7.79	98.3	92.21	573	891	17	76	874	815	42	1.91
NMW2815	POWNA1712-12	JN891736	Herbarium	Caryophyllales	Caryophyllaceae	Silene	Silene_nutans	1968	rbcL	rbcLa-F	rbcLr590	571	33	4	37	534	4	7	530	527	60	6.48	0.75	1.31	99.25	98.69	569	16	27	43	526	6	12	520	514	59	7.56	1.14	2.28	98.86	97.72	578	1060	10	19	1050	1041	60	0.94
NMW2816	POWNA1713-12	JN891737	Herbarium	Caryophyllales	Caryophyllaceae	Silene	Silene_nutans	1966	rbcL	rbcLa-F	rbcLr590	565	28	13	41	524	6	21	518	503	51	7.26	1.15	4.01	98.85	95.99	567	12	19	31	536	4	14	532	522	58	5.47	0.75	2.61	99.25	97.39	572	1060	10	35	1050	1025	54	0.94
NMW728	POWNA684-10	JN892752	Herbarium	Caryophyllales	Caryophyllaceae	Silene	Silene_uniflora	1999	rbcL	rbcLa-F	rbcLr590	655	27	109	136	519	6	36	513	483	44	20.76	1.16	6.94	98.84	93.06	734	181	67	248	486	5	33	481	453	45	33.79	1.03	6.79	98.97	93.21	569	1005	11	69	994	936	44	1.09
NMW2820	POWNA1873-12	JN891968	Herbarium	Caryophyllales	Caryophyllaceae	Silene	Silene_uniflora	1973	rbcL	rbcLa-F	rbcLr590	563	28	7	35	528	4	5	524	523	60	6.22	0.76	0.95	99.24	99.05	569	12	33	45	524	4	9	520	515	60	7.91	0.76	1.72	99.24	98.28	574	1052	8	14	1044	1038	60	0.76
NMW2819	POWNA1715-12	JN890910	Herbarium	Caryophyllales	Caryophyllaceae	Silene	Silene_uniflora	2007	rbcL	rbcLa-F	rbcLr590	569	36	5	41	528	4	5	524	523	60	7.21	0.76	0.95	99.24	99.05	571	13	28	41	530	4	6	526	524	60	7.18	0.75	1.13	99.25	98.87	581	1058	8	11	1050	1047	60	0.76
NMW519	POWNA446-10	JN892501	Herbarium	Caryophyllales	Caryophyllaceae	Silene	Silene_viscaria	1960	rbcL	rbcLa-F	rbcLr590	643	30	94	124	519	9	40	510	479	44	19.28	1.73	7.71	98.27	92.29	711	158	75	233	478	5	25	473	453	47	32.77	1.05	5.23	98.95	94.77	570	997	14	65	983	932	46	1.4
NMW2769	POWNA2390-12	JN892694	Herbarium	Caryophyllales	Caryophyllaceae	Silene	Silene_viscaria	1962	rbcL	rbcLa-F	rbcLr590	575	52	7	59	516	4	8	512	508	59	10.26	0.78	1.55	99.22	98.45	571	13	37	50	521	4	8	517	513	60	8.76	0.77	1.54	99.23	98.46	574	1037	8	16	1029	1021	59	0.77
NMW2770	POWNA2241-12	JN892475	Herbarium	Caryophyllales	Caryophyllaceae	Silene	Silene_viscaria		rbcL	rbcLa-F	rbcLr590	567	30	10	40	527	4	6	523	521	60	7.05	0.76	1.14	99.24	98.86	568	10	32	42	526	4	5	522	521	59	7.39	0.76	0.95	99.24	99.05	572	1053	8	11	1045	1042	60	0.76
NMW713	POWNA685-10	JN892985	Herbarium	Caryophyllales	Caryophyllaceae	Silene	Silene_vulgaris	1985	rbcL	rbcLa-F	rbcLr590	659	28	111	139	520	5	25	515	495	46	21.09	0.96	4.81	99.04	95.19	685	134	36	170	515	6	29	509	486	47	24.82	1.17	5.63	98.83	94.37	568	1035	11	54	1024	981	46	1.06
NMW2818	POWNA1714-12	JN891738	Herbarium	Caryophyllales	Caryophyllaceae	Silene	Silene_vulgaris	1987	rbcL	rbcLa-F	rbcLr590	568	31	3	34	534	4	8	530	526	60	5.99	0.75	1.5	99.25	98.5	569	14	30	44	525	4	5	521	520	60	7.73	0.76	0.95	99.24	99.05	578	1059	8	13	1051	1046	60	0.76
NMW789	POWNA721-10	JN891839	Herbarium	Caryophyllales	Caryophyllaceae	Spergula	Spergula_arvensis	1980	rbcL	rbcLa-F	rbcLr590	639	56	80	136	503	5	34	498	469	46	21.28	0.99	6.76	99.01	93.24	632	73	93	166	466	5	25	461	441	44	26.27	1.07	5.36	98.93	94.64	581	969	10	59	959	910	45	1.03
NMW2821	POWNA1418-12	JN891967	Herbarium	Caryophyllales	Caryophyllaceae	Spergula	Spergula_arvensis	1982	rbcL	rbcLa-F	rbcLr590	577	46	4	50	527	4	8	523	519	60	8.67	0.76	1.52	99.24	98.48	576	10	57	67	509	5	10	504	499	59	11.63	0.98	1.96	99.02	98.04	584	1036	9	18	1027	1018	59	0.87
NMW2822	POWNA1875-12	JN891970	Herbarium	Caryophyllales	Caryophyllaceae	Spergula	Spergula_arvensis	1968	rbcL	rbcLa-F	rbcLr590	561	29	15	44	517	5	14	512	503	56	7.84	0.97	2.71	99.03	97.29	566	11	25	36	530	4	14	526	516	59	6.36	0.75	2.64	99.25	97.36	570	1047	9	28	1038	1019	58	0.86
NMW788	POWNA722-10	JN891840	Herbarium	Caryophyllales	Caryophyllaceae	Spergularia	Spergularia_marina	1998	rbcL	rbcLa-F	rbcLr590	638	24	90	114	524	4	29	520	495	46	17.87	0.76	5.53	99.24	94.47	648	97	31	128	520	5	20	515	500	49	19.75	0.96	3.85	99.04	96.15	573	1044	9	49	1035	995	48	0.86
NMW2824	POWNA1869-12	JN891964	Herbarium	Caryophyllales	Caryophyllaceae	Spergularia	Spergularia_marina	1951	rbcL	rbcLa-F	rbcLr590	570	37	8	45	525	4	9	521	516	60	7.89	0.76	1.71	99.24	98.29	573	11	44	55	518	4	5	514	513	60	9.6	0.77	0.97	99.23	99.03	574	1043	8	14	1035	1029	60	0.77
NMW6482	POWNA1333-12	JN891161	Fresh	Caryophyllales	Caryophyllaceae	Spergularia	Spergularia_marina	2011	rbcL	rbcLa-F	rbcLr590	561	24	11	35	526	4	9	522	517	56	6.24	0.76	1.71	99.24	98.29	567	10	29	39	528	4	7	524	521	60	6.88	0.76	1.33	99.24	98.67	570	1054	8	16	1046	1038	58	0.76
NMW2823	POWNA1874-12	JN891969	Herbarium	Caryophyllales	Caryophyllaceae	Spergularia	Spergularia_marina	2003	rbcL	rbcLa-F	rbcLr590	551	23	1	24	527	4	12	523	515	57	4.36	0.76	2.28	99.24	97.72	569	12	27	39	530	4	8	526	522	59	6.85	0.75	1.51	99.25	98.49	573	1057	8	20	1049	1037	58	0.76
NMW786	POWNA723-10	JN891830	Herbarium	Caryophyllales	Caryophyllaceae	Spergularia	Spergularia_media	2002	rbcL	rbcLa-F	rbcLr590	689	41	92	133	556	17	60	539	496	42	19.3	3.06	10.79	96.94	89.21	720	170	102	272	448	6	57	442	391	39	37.78	1.34	12.72	98.66	87.28	612	1004	23	117	981	887	41	2.29
NMW2825	POWNA1868-12	JN891963	Herbarium	Caryophyllales	Caryophyllaceae	Spergularia	Spergularia_media	1974	rbcL	rbcLa-F	rbcLr590	565	31	3	34	531	4	6	527	525	60	6.02	0.75	1.13	99.25	98.87	569	8	31	39	530	4	8	526	522	58	6.85	0.75	1.51	99.25	98.49	581	1061	8	14	1053	1047	59	0.75
NMW6464	POWNA2274-12	JN892555	Fresh	Caryophyllales	Caryophyllaceae	Spergularia	Spergularia_media	2011	rbcL	rbcLa-F	rbcLr590	561	26	10	36	525	4	10	521	515	54	6.42	0.76	1.9	99.24	98.1	567	6	31	37	530	4	8	526	522	59	6.53	0.75	1.51	99.25	98.49	575	1055	8	18	1047	1037	57	0.76
NMW787	POWNA724-10	JN891829	Herbarium	Caryophyllales	Caryophyllaceae	Spergularia	Spergularia_rubra	1987	rbcL	rbcLa-F	rbcLr590	727	36	127	163	564	21	59	543	505	43	22.42	3.72	10.46	96.28	89.54	669	120	135	255	414	21	122	393	292	33	38.12	5.07	29.47	94.93	70.53	617	978	42	181	936	797	39	4.29
NMW2827	POWNA1870-12	JN891965	Herbarium	Caryophyllales	Caryophyllaceae	Spergularia	Spergularia_rubra	1968	rbcL	rbcLa-F	rbcLr590	572	40	6	46	526	4	12	522	514	54	8.04	0.76	2.28	99.24	97.72	569	14	32	46	523	4	9	519	514	59	8.08	0.76	1.72	99.24	98.28	576	1049	8	21	1041	1028	56	0.76
NMW2829	POWNA1864-12	JN891959	Herbarium	Caryophyllales	Caryophyllaceae	Spergularia	Spergularia_rubra	1972	rbcL	rbcLa-F	rbcLr590	569	30	8	38	531	6	15	525	516	57	6.68	1.13	2.82	98.87	97.18	570	14	30	44	526	4	6	522	520	60	7.72	0.76	1.14	99.24	98.86	576	1057	10	21	1047	1036	58	0.95
NMW5246	POWNB108-10	JN893434	Fresh	Caryophyllales	Caryophyllaceae	Spergularia	Spergularia_rubra	2010	rbcL	rbcLa-F	rbcLr590	565	25	16	41	524	4	7	520	517	58	7.26	0.76	1.34	99.24	98.66	564	12	27	39	525	4	7	521	518	59	6.91	0.76	1.33	99.24	98.67	567	1049	8	14	1041	1035	58	0.76
NMW785	POWNA725-10	JN891831	Herbarium	Caryophyllales	Caryophyllaceae	Spergularia	Spergularia_rupicola	1999	rbcL	rbcLa-F	rbcLr590	671	26	125	151	520	4	28	516	492	45	22.5	0.77	5.38	99.23	94.62	676	124	36	160	516	4	18	512	498	52	23.67	0.78	3.49	99.22	96.51	569	1036	8	46	1028	990	48	0.77
NMW2830	POWNA2045-12	JN890950	Herbarium	Caryophyllales	Caryophyllaceae	Spergularia	Spergularia_rupicola	1958	rbcL	rbcLa-F	rbcLr590	566	31	3	34	532	4	7	528	525	60	6.01	0.75	1.32	99.25	98.68	571	9	38	47	524	4	4	520	520	59	8.23	0.76	0.76	99.24	99.24	581	1056	8	11	1048	1045	59	0.76
NMW2831	POWNA3102-12	JN892196	Herbarium	Caryophyllales	Caryophyllaceae	Spergularia	Spergularia_rupicola	1952	rbcL	rbcLa-F	rbcLajf634R	628	31	5	36	592	7	18	585	574	53	5.73	1.18	3.04	98.82	96.96	628	3	26	29	599	4	15	595	584	58	4.62	0.67	2.5	99.33	97.5	656	1191	11	33	1180	1158	56	0.92
NMW2832	POWNA2043-12	JN892193	Herbarium	Caryophyllales	Caryophyllaceae	Stellaria	Stellaria_graminea	1968	rbcL	rbcLa-F	rbcLr590	572	36	6	42	530	4	7	526	523	60	7.34	0.75	1.32	99.25	98.68	570	11	31	42	528	4	7	524	521	59	7.37	0.76	1.33	99.24	98.67	580	1058	8	14	1050	1044	60	0.76
NMW2833	POWNA3100-12	JN892194	Herbarium	Caryophyllales	Caryophyllaceae	Stellaria	Stellaria_graminea	2009	rbcL	rbcLa-F	rbcLr590	568	30	11	41	527	5	12	522	515	56	7.22	0.95	2.28	99.05	97.72	570	12	28	40	530	4	9	526	521	58	7.02	0.75	1.7	99.25	98.3	575	1057	9	21	1048	1036	57	0.85
NBGW3021	POWNA732-10	JN890625	Fresh	Caryophyllales	Caryophyllaceae	Stellaria	Stellaria_graminea	2008	rbcL	rbcLa-F	rbcLr590	563	25	16	41	522	12	18	510	504	58	7.28	2.3	3.45	97.7	96.55	564	17	15	32	532	7	18	525	514	56	5.67	1.32	3.38	98.68	96.62	565	1054	19	36	1035	1018	57	1.8
NMW780	POWNA733-10	JN891836	Herbarium	Caryophyllales	Caryophyllaceae	Stellaria	Stellaria_holostea	2002	rbcL	rbcLa-F	rbcLr590	629	111	74	185	444	12	66	432	378	38	29.41	2.7	14.86	97.3	85.14	644	86	189	275	369	7	45	362	324	39	42.7	1.9	12.2	98.1	87.8	581	813	19	111	794	702	39	2.34
NMW2834	POWNA2049-12	JN892199	Herbarium	Caryophyllales	Caryophyllaceae	Stellaria	Stellaria_holostea	1968	rbcL	rbcLa-F	rbcLr590	571	38	4	42	529	4	6	525	523	60	7.36	0.76	1.13	99.24	98.87	570	5	58	63	507	4	7	503	500	59	11.05	0.79	1.38	99.21	98.62	586	1036	8	13	1028	1023	59	0.77
NMW2835	POWNA3106-12	JN892200	Herbarium	Caryophyllales	Caryophyllaceae	Stellaria	Stellaria_holostea	1974	rbcL	rbcLa-F	rbcLr590	563	44	14	58	505	8	34	497	471	50	10.3	1.58	6.73	98.42	93.27	566	14	31	45	521	5	7	516	514	60	7.95	0.96	1.34	99.04	98.66	566	1026	13	41	1013	985	55	1.27
NMW6221	POWNA1756-12	JN893050	Fresh	Caryophyllales	Caryophyllaceae	Stellaria	Stellaria_holostea	2011	rbcL	rbcLa-F	rbcLr590	567	27	6	33	534	4	9	530	525	58	5.82	0.75	1.69	99.25	98.31	562	12	16	28	534	4	7	530	527	60	4.98	0.75	1.31	99.25	98.69	578	1068	8	16	1060	1052	59	0.75
NMW778	POWNA734-10	JN893483	Herbarium	Caryophyllales	Caryophyllaceae	Stellaria	Stellaria_media	1982	rbcL	rbcLa-F	rbcLr590	644	117	88	205	439	10	46	429	393	42	31.83	2.28	10.48	97.72	89.52	655	102	182	284	371	12	58	359	313	38	43.36	3.23	15.63	96.77	84.37	577	810	22	104	788	706	40	2.72
NMW2838	POWNA2039-12	JN892187	Herbarium	Caryophyllales	Caryophyllaceae	Stellaria	Stellaria_media	1994	rbcL	rbcLa-F	rbcLr590	569	38	9	47	522	4	6	518	516	57	8.26	0.77	1.15	99.23	98.85	572	13	36	49	523	4	6	519	517	59	8.57	0.76	1.15	99.24	98.85	572	1045	8	12	1037	1033	58	0.77
NMW5184	POWNB060-10	JN892262	Fresh	Caryophyllales	Caryophyllaceae	Stellaria	Stellaria_media	2010	rbcL	rbcLa-F	rbcLr590	567	30	13	43	524	4	8	520	516	59	7.58	0.76	1.53	99.24	98.47	569	15	28	43	526	4	11	522	515	58	7.56	0.76	2.09	99.24	97.91	567	1050	8	19	1042	1031	59	0.76
NMW2837	POWNA2048-12	JN892198	Herbarium	Caryophyllales	Caryophyllaceae	Stellaria	Stellaria_media	1966	rbcL	rbcLa-F	rbcLr590	573	44	2	46	527	10	22	517	505	56	8.03	1.9	4.17	98.1	95.83	567	4	34	38	529	5	19	524	510	54	6.7	0.95	3.59	99.05	96.41	588	1056	15	41	1041	1015	55	1.42
NMW2840	POWNA946-12	JN890565	Herbarium	Caryophyllales	Caryophyllaceae	Stellaria	Stellaria_neglecta	1991	rbcL	rbcLa-F	rbcLr590	575	46	15	61	514	4	4	510	510	58	10.61	0.78	0.78	99.22	99.22	572	11	38	49	523	4	9	519	514	60	8.57	0.76	1.72	99.24	98.28	570	1037	8	13	1029	1024	59	0.77
NMW2839	POWNA3095-12	JN892188	Herbarium	Caryophyllales	Caryophyllaceae	Stellaria	Stellaria_neglecta	1987	rbcL	rbcLa-F	rbcLr590	684	40	119	159	525	8	36	517	489	46	23.25	1.52	6.86	98.48	93.14	570	3	39	42	528	8	19	520	509	57	7.37	1.52	3.6	98.48	96.4	588	1053	16	55	1037	998	52	1.52
NMW779	POWNA735-10	JN893484	Herbarium	Caryophyllales	Caryophyllaceae	Stellaria	Stellaria_nemorum	1983	rbcL	rbcLa-F	rbcLr590	907	40	352	392	515	19	39	496	476	48	43.22	3.69	7.57	96.31	92.43	694	140	55	195	499	5	18	494	481	55	28.1	1	3.61	99	96.39	568	1014	24	57	990	957	51	2.37
NMW2843	POWNA944-12	JN890563	Herbarium	Caryophyllales	Caryophyllaceae	Stellaria	Stellaria_nemorum	1986	rbcL	rbcLa-F	rbcLr590	573	65	4	69	504	4	6	500	498	57	12.04	0.79	1.19	99.21	98.81	573	16	54	70	503	4	8	499	495	56	12.22	0.8	1.59	99.2	98.41	579	1007	8	14	999	993	57	0.79
NMW2842	POWNA945-12	JN890564	Herbarium	Caryophyllales	Caryophyllaceae	Stellaria	Stellaria_nemorum	2000	rbcL	rbcLa-F	rbcLr590	566	28	5	33	533	4	6	529	527	59	5.83	0.75	1.13	99.25	98.87	566	13	26	39	527	4	4	523	523	60	6.89	0.76	0.76	99.24	99.24	578	1060	8	10	1052	1050	59	0.75
NMW782	POWNA736-10	JN891834	Herbarium	Caryophyllales	Caryophyllaceae	Stellaria	Stellaria_pallida	1984	rbcL	rbcLa-F	rbcLr590	642	78	84	162	480	6	53	474	427	42	25.23	1.25	11.04	98.75	88.96	650	102	117	219	431	8	74	423	357	37	33.69	1.86	17.17	98.14	82.83	575	911	14	127	897	784	40	1.54
NMW2845	POWNA943-12	JN890562	Herbarium	Caryophyllales	Caryophyllaceae	Stellaria	Stellaria_pallida	1984	rbcL	rbcLa-F	rbcLr590	569	36	12	48	521	4	9	517	512	56	8.44	0.77	1.73	99.23	98.27	564	11	28	39	525	4	7	521	518	59	6.91	0.76	1.33	99.24	98.67	571	1046	8	16	1038	1030	58	0.76
NMW775	POWNA737-10	JN893490	Herbarium	Caryophyllales	Caryophyllaceae	Stellaria	Stellaria_palustris	1977	rbcL	rbcLa-F	rbcLr590	642	32	91	123	519	6	36	513	483	45	19.16	1.16	6.94	98.84	93.06	715	162	77	239	476	6	32	470	444	43	33.43	1.26	6.72	98.74	93.28	570	995	12	68	983	927	44	1.21
NMW2848	POWNA940-12	JN890559	Herbarium	Caryophyllales	Caryophyllaceae	Stellaria	Stellaria_palustris	1955	rbcL	rbcLa-F	rbcLr590	575	43	6	49	526	4	8	522	518	57	8.52	0.76	1.52	99.24	98.48	570	14	43	57	513	4	10	509	503	59	10	0.78	1.95	99.22	98.05	579	1039	8	18	1031	1021	58	0.77
NMW2847	POWNA941-12	JN890611	Herbarium	Caryophyllales	Caryophyllaceae	Stellaria	Stellaria_palustris	1956	rbcL	rbcLa-F	rbcLr590	572	36	14	50	522	7	20	515	502	52	8.74	1.34	3.83	98.66	96.17	571	14	31	45	526	4	10	522	516	59	7.88	0.76	1.9	99.24	98.1	569	1048	11	30	1037	1018	56	1.05
NMW2849	POWNA939-12	JN890558	Herbarium	Caryophyllales	Caryophyllaceae	Stellaria	Stellaria_palustris	1939	rbcL	rbcLa-F	rbcLr590	565	36	7	43	522	12	41	510	481	46	7.61	2.3	7.85	97.7	92.15	570	10	31	41	529	4	11	525	518	59	7.19	0.76	2.08	99.24	97.92	575	1051	16	52	1035	999	52	1.52
NMW777	POWNA738-10	JN893489	Herbarium	Caryophyllales	Caryophyllaceae	Stellaria	Stellaria_uliginosa	1998	rbcL	rbcLa-F	rbcLr590	617	27	72	99	518	5	38	513	480	44	16.05	0.97	7.34	99.03	92.66	562	16	26	42	520	4	8	516	512	57	7.47	0.77	1.54	99.23	98.46	565	1038	9	46	1029	992	51	0.87
NMW2851	POWNA1919-12	JN890782	Herbarium	Caryophyllales	Caryophyllaceae	Stellaria	Stellaria_uliginosa	2003	rbcL	rbcLa-F	rbcLr590	565	27	30	57	508	8	21	500	487	52	10.09	1.57	4.13	98.43	95.87	570	14	26	40	530	4	8	526	522	58	7.02	0.75	1.51	99.25	98.49	556	1038	12	29	1026	1009	55	1.16
NMW3617	POWNA1344-12	JN891180	Herbarium	Caryophyllales	Droseraceae	Drosera	Drosera_anglica	1949	rbcL	rbcLa-F	rbcLr590	574	45	41	86	488	7	30	481	458	48	14.98	1.43	6.15	98.57	93.85	572	4	48	52	520	8	17	512	503	54	9.09	1.54	3.27	98.46	96.73	551	1008	15	47	993	961	51	1.49
NMW5058	POWNB005-10	JN891312	Fresh	Caryophyllales	Droseraceae	Drosera	Drosera_anglica	2010	rbcL	rbcLa-F	rbcLr590	566	28	15	43	523	4	10	519	513	58	7.6	0.76	1.91	99.24	98.09	565	8	24	32	533	5	17	528	516	56	5.66	0.94	3.19	99.06	96.81	570	1056	9	27	1047	1029	57	0.85
NMW3618	POWNA1338-12	JN891175	Herbarium	Caryophyllales	Droseraceae	Drosera	Drosera_intermedia	1955	rbcL	rbcLa-F	rbcLa-R	585	52	10	62	523	9	33	514	490	49	10.6	1.72	6.31	98.28	93.69	587	10	51	61	526	8	22	518	504	57	10.39	1.52	4.18	98.48	95.82	584	1049	17	55	1032	994	53	1.62
NMW6255	POWNA2460-12	JN892825	Fresh	Caryophyllales	Droseraceae	Drosera	Drosera_rotundifolia	2011	rbcL	rbcLa-F	rbcLr590	569	31	3	34	535	4	10	531	525	57	5.98	0.75	1.87	99.25	98.13	568	10	31	41	527	4	6	523	521	59	7.22	0.76	1.14	99.24	98.86	582	1062	8	16	1054	1046	58	0.75
NMW6253	POWNA2462-12	JN892827	Fresh	Caryophyllales	Droseraceae	Drosera	Drosera_rotundifolia	2011	rbcL	rbcLa-F	rbcLr590	569	32	12	44	525	4	7	521	518	59	7.73	0.76	1.33	99.24	98.67	565	10	29	39	526	4	6	522	520	60	6.9	0.76	1.14	99.24	98.86	571	1051	8	13	1043	1038	59	0.76
NBGW6054	POWNB222-10	JN893776	Fresh	Caryophyllales	Droseraceae	Drosera	Drosera_rotundifolia	2010	rbcL	rbcLa-F	rbcLr590	862	19	39	58	804	31	96	773	708	48	6.73	3.86	11.94	96.14	88.06	839	10	26	36	803	21	62	782	741	50	4.29	2.62	7.72	97.38	92.28	1117	1607	52	158	1555	1449	49	3.24
NMW278	POWNA859-10	JN892243	Herbarium	Caryophyllales	Frankeniaceae	Frankenia	Frankenia_laevis	1979	rbcL	rbcLa-F	rbcLr506	480	39	11	50	430	10	29	420	401	49	10.42	2.33	6.74	97.67	93.26	477	16	22	38	439	11	21	428	418	53	7.97	2.51	4.78	97.49	95.22	486	869	21	50	848	819	51	2.42
NMW556	POWNA480-10	JN893439	Herbarium	Caryophyllales	Montiaceae	Montia	Montia_fontana	1996	rbcL	rbcLa-F	rbcLr590	650	31	101	132	518	5	22	513	496	46	20.31	0.97	4.25	99.03	95.75	649	97	27	124	525	4	12	521	513	56	19.11	0.76	2.29	99.24	97.71	569	1043	9	34	1034	1009	51	0.86
NMW2908	POWNA1217-12	JN891297	Herbarium	Caryophyllales	Montiaceae	Montia	Montia_fontana	1990	rbcL	rbcLa-F	rbcLr590	550	22	4	26	524	4	9	520	515	59	4.73	0.76	1.72	99.24	98.28	569	7	38	45	524	4	11	520	513	59	7.91	0.76	2.1	99.24	97.9	568	1048	8	20	1040	1028	59	0.76
NMW2907	POWNA1390-12	JN891226	Herbarium	Caryophyllales	Montiaceae	Montia	Montia_fontana	1990	rbcL	rbcLa-F	rbcLr590	572	33	6	39	533	4	10	529	523	60	6.82	0.75	1.88	99.25	98.12	569	13	24	37	532	4	10	528	522	60	6.5	0.75	1.88	99.25	98.12	577	1065	8	20	1057	1045	60	0.75
NMW059	POWNA052-10	JN892412	Herbarium	Caryophyllales	Plumbaginaceae	Armeria	Armeria_maritima	1993	rbcL	rbcLa-F	rbcLr590	626	30	78	108	518	6	37	512	481	45	17.25	1.16	7.14	98.84	92.86	641	89	45	134	507	4	16	503	491	52	20.9	0.79	3.16	99.21	96.84	569	1025	10	53	1015	972	49	0.98
NMW2909	POWNA1226-12	JN891216	Herbarium	Caryophyllales	Plumbaginaceae	Armeria	Armeria_maritima	1961	rbcL	rbcLa-F	rbcLr590	581	64	1	65	516	4	7	512	509	58	11.19	0.78	1.36	99.22	98.64	577	11	57	68	509	4	8	505	501	59	11.79	0.79	1.57	99.21	98.43	584	1025	8	15	1017	1010	59	0.78
NMW6463	POWNA2272-12	JN892553	Fresh	Caryophyllales	Plumbaginaceae	Armeria	Armeria_maritima	2011	rbcL	rbcLa-F	rbcLr590	564	27	12	39	525	4	8	521	517	56	6.91	0.76	1.52	99.24	98.48	569	10	27	37	532	4	13	528	519	59	6.5	0.75	2.44	99.25	97.56	572	1057	8	21	1049	1036	58	0.76
NMW2912	POWNA1214-12	JN890969	Herbarium	Caryophyllales	Plumbaginaceae	Limonium	Limonium_binervosum	1965	rbcL	rbcLa-F	rbcLr590	563	145	39	184	379	35	79	344	300	46	32.68	9.23	20.84	90.77	79.16	568	32	131	163	405	40	77	365	328	47	28.7	9.88	19.01	90.12	80.99	523	784	75	156	709	628	47	9.57
NMW5248	POWNB116-10	JN893427	Fresh	Caryophyllales	Plumbaginaceae	Limonium	Limonium_binervosum	2010	rbcL	rbcLa-F	rbcLa-R	573	34	3	37	536	16	36	520	500	56	6.46	2.99	6.72	97.01	93.28	576	3	39	42	534	9	18	525	516	54	7.29	1.69	3.37	98.31	96.63	597	1070	25	54	1045	1016	55	2.34
NMW2913	POWNA1213-12	JN890968	Herbarium	Caryophyllales	Plumbaginaceae	Limonium	Limonium_binervosum	1969	rbcL	rbcLa-F	rbcLr590	569	31	11	42	527	4	19	523	508	57	7.38	0.76	3.61	99.24	96.39	564	3	32	35	529	6	13	523	516	59	6.21	1.13	2.46	98.87	97.54	579	1056	10	32	1046	1024	58	0.95
NMW495	POWNA424-10	JN891805	Herbarium	Caryophyllales	Plumbaginaceae	Limonium	Limonium_humile	1985	rbcL	rbcLa-F	rbcLr590	646	77	86	163	483	7	45	476	438	44	25.23	1.45	9.32	98.55	90.68	562	14	127	141	421	6	19	415	402	47	25.09	1.43	4.51	98.57	95.49	576	904	13	64	891	840	46	1.44
NMW2915	POWNA2741-12	JN893200	Herbarium	Caryophyllales	Plumbaginaceae	Limonium	Limonium_humile	1986	rbcL	rbcLa-F	rbcLr590	565	27	5	32	533	6	17	527	516	56	5.66	1.13	3.19	98.87	96.81	565	14	24	38	527	5	19	522	508	58	6.73	0.95	3.61	99.05	96.39	577	1060	11	36	1049	1024	57	1.04
NMW5199	POWNB070-10	JN892498	Fresh	Caryophyllales	Plumbaginaceae	Limonium	Limonium_vulgare	2010	rbcL	rbcLa-F	rbcLr590	568	32	7	39	529	4	7	525	522	58	6.87	0.76	1.32	99.24	98.68	571	12	34	46	525	4	12	521	513	58	8.06	0.76	2.29	99.24	97.71	578	1054	8	19	1046	1035	58	0.76
NMW2917	POWNA1209-12	JN890964	Herbarium	Caryophyllales	Plumbaginaceae	Limonium	Limonium_vulgare	1993	rbcL	rbcLa-F	rbcLr590	564	31	1	32	532	4	11	528	521	57	5.67	0.75	2.07	99.25	97.93	567	11	31	42	525	4	13	521	512	59	7.41	0.76	2.48	99.24	97.52	581	1057	8	24	1049	1033	58	0.76
NMW2947	POWNA1915-12	JN893583	Herbarium	Caryophyllales	Plumbaginaceae	Limonium	Limonium_vulgare	1989	rbcL	rbcLa-F	rbcLr590	562	28	8	36	526	4	7	522	519	57	6.41	0.76	1.33	99.24	98.67	569	15	27	42	527	4	5	523	522	60	7.38	0.76	0.95	99.24	99.05	571	1053	8	12	1045	1041	58	0.76
NMW344	POWNA899-10	JN891659	Herbarium	Caryophyllales	Polygonaceae	Fallopia	Fallopia_convolvulus	2002	rbcL	rbcLa-F	rbcLr590	787	16	241	257	530	9	18	521	512	57	32.66	1.7	3.4	98.3	96.6	651	102	28	130	521	4	6	517	515	59	19.97	0.77	1.15	99.23	98.85	562	1051	13	24	1038	1027	58	1.24
NMW2919	POWNA1205-12	JN890960	Herbarium	Caryophyllales	Polygonaceae	Fallopia	Fallopia_convolvulus	2007	rbcL	rbcLa-F	rbcLr590	564	25	14	39	525	4	9	521	516	59	6.91	0.76	1.71	99.24	98.29	568	11	22	33	535	4	12	531	523	59	5.81	0.75	2.24	99.25	97.76	571	1060	8	21	1052	1039	59	0.75
NMW5267	POWNB124-10	JN890617	Fresh	Caryophyllales	Polygonaceae	Fallopia	Fallopia_convolvulus	2010	rbcL	rbcLa-F	rbcLr590	565	35	13	48	517	4	7	513	510	59	8.5	0.77	1.35	99.23	98.65	564	10	22	32	532	4	11	528	521	58	5.67	0.75	2.07	99.25	97.93	573	1049	8	18	1041	1031	59	0.76
NMW2953	POWNA2894-12	JN893392	Herbarium	Caryophyllales	Polygonaceae	Fallopia	Fallopia_dumetorum	1974	rbcL	rbcLa-F	rbcLa-R	580	48	3	51	529	11	24	518	505	53	8.79	2.08	4.54	97.92	95.46	575	3	69	72	503	12	42	491	461	54	12.52	2.39	8.35	97.61	91.65	593	1032	23	66	1009	966	53	2.23
NMW2921	POWNA1054-12	JN890734	Herbarium	Caryophyllales	Polygonaceae	Fallopia	Fallopia_dumetorum	1979	rbcL	rbcLa-F	rbcLr590	576	52	8	60	516	7	16	509	500	58	10.42	1.36	3.1	98.64	96.9	574	3	42	45	529	4	13	525	516	58	7.84	0.76	2.46	99.24	97.54	585	1045	11	29	1034	1016	58	1.05
NMW2922	POWNA1055-12	JN890735	Herbarium	Caryophyllales	Polygonaceae	Fallopia	Fallopia_dumetorum	1947	rbcL	rbcLa-F	rbcL_724R	710	27	31	58	652	8	31	644	621	48	8.17	1.23	4.75	98.77	95.25	717	8	39	47	670	4	6	666	664	58	6.56	0.6	0.9	99.4	99.1	708	1322	12	37	1310	1285	53	0.91
NBGW6098	POWNB173-10	JN890981	Fresh	Caryophyllales	Polygonaceae	Oxyria	Oxyria_digyna	2009	rbcL	rbcLa-F	rbcLr590	568	28	11	39	529	5	12	524	517	58	6.87	0.95	2.27	99.05	97.73	571	12	27	39	532	6	31	526	501	47	6.83	1.13	5.83	98.87	94.17	576	1061	11	43	1050	1018	52	1.04
NMW2939	POWNA3182-12	JN893821	herbarium	Caryophyllales	Polygonaceae	Persicaria	Persicaria vivipara	1961	rbcL	rbcLa-F	rbcLr590
NMW612	POWNA521-10	JN893747	Herbarium	Caryophyllales	Polygonaceae	Persicaria	Persicaria_amphibia	1987	rbcL	rbcLa-F	rbcLr590	650	95	90	185	465	8	28	457	437	46	28.46	1.72	6.02	98.28	93.98	565	6	150	156	409	6	42	403	367	42	27.61	1.47	10.27	98.53	89.73	583	874	14	70	860	804	44	1.6
NMW2924	POWNA1057-12	JN890737	Herbarium	Caryophyllales	Polygonaceae	Persicaria	Persicaria_amphibia	1993	rbcL	rbcLa-F	rbcLr590	567	31	14	45	522	4	6	518	516	59	7.94	0.77	1.15	99.23	98.85	573	11	39	50	523	4	10	519	513	60	8.73	0.76	1.91	99.24	98.09	570	1045	8	16	1037	1029	59	0.77
NMW2923	POWNA1776-12	JN890736	Herbarium	Caryophyllales	Polygonaceae	Persicaria	Persicaria_amphibia	1993	rbcL	rbcLa-F	rbcLr590	567	30	14	44	523	4	5	519	518	59	7.76	0.76	0.96	99.24	99.04	571	14	35	49	522	4	5	518	517	59	8.58	0.77	0.96	99.23	99.04	567	1045	8	10	1037	1035	59	0.77
NMW2925	POWNA1058-12	JN890738	Herbarium	Caryophyllales	Polygonaceae	Persicaria	Persicaria_amphibia	1986	rbcL	rbcLa-F	rbcLr590	565	27	12	39	526	4	10	522	516	55	6.9	0.76	1.9	99.24	98.1	565	10	31	41	524	4	8	520	516	56	7.26	0.76	1.53	99.24	98.47	571	1050	8	18	1042	1032	55	0.76
NMW5270	POWNB118-10	JN893693	Fresh	Caryophyllales	Polygonaceae	Persicaria	Persicaria_amphibia	2010	rbcL	rbcLa-F	rbcLr590	564	16	12	28	536	5	14	531	522	58	4.96	0.93	2.61	99.07	97.39	568	11	26	37	531	4	9	527	522	58	6.51	0.75	1.69	99.25	98.31	573	1067	9	23	1058	1044	58	0.84
NMW613	POWNA522-10	JN893746	Herbarium	Caryophyllales	Polygonaceae	Persicaria	Persicaria_bistorta	1984	rbcL	rbcLa-F	rbcLr590	636	30	86	116	520	5	22	515	498	48	18.24	0.96	4.23	99.04	95.77	630	85	52	137	493	4	13	489	480	51	21.75	0.81	2.64	99.19	97.36	562	1013	9	35	1004	978	49	0.89
NMW2931	POWNA1755-12	JN893813	Herbarium	Caryophyllales	Polygonaceae	Persicaria	Persicaria_bistorta	1987	rbcL	rbcLa-F	rbcLr590	565	28	13	41	524	5	11	519	513	59	7.26	0.95	2.1	99.05	97.9	569	15	27	42	527	4	8	523	519	59	7.38	0.76	1.52	99.24	98.48	568	1051	9	19	1042	1032	59	0.86
NMW2930	POWNA3175-12	JN893814	Herbarium	Caryophyllales	Polygonaceae	Persicaria	Persicaria_bistorta		rbcL	rbcLa-F	rbcLr590	572	29	7	36	536	4	8	532	528	59	6.29	0.75	1.49	99.25	98.51	569	14	27	41	528	4	6	524	522	60	7.21	0.76	1.14	99.24	98.86	578	1064	8	14	1056	1050	59	0.75
NMW614	POWNA523-10	JN893741	Herbarium	Caryophyllales	Polygonaceae	Persicaria	Persicaria_hydropiper	1990	rbcL	rbcLa-F	rbcLr590	644	102	79	181	463	8	31	455	432	44	28.11	1.73	6.7	98.27	93.3	565	18	150	168	397	10	45	387	352	40	29.73	2.52	11.34	97.48	88.66	573	860	18	76	842	784	42	2.09
NMW2927	POWNA1060-12	JN890740	Herbarium	Caryophyllales	Polygonaceae	Persicaria	Persicaria_hydropiper	1993	rbcL	rbcLa-F	rbcLr590	564	23	21	44	520	18	36	502	484	56	7.8	3.46	6.92	96.54	93.08	570	10	28	38	532	4	12	528	520	59	6.67	0.75	2.26	99.25	97.74	568	1052	22	48	1030	1004	58	2.09
NMW2926	POWNA1059-12	JN890739	Herbarium	Caryophyllales	Polygonaceae	Persicaria	Persicaria_hydropiper	1998	rbcL	rbcLa-F	rbcLr590	575	36	6	42	533	4	7	529	526	60	7.3	0.75	1.31	99.25	98.69	566	10	26	36	530	4	7	526	523	60	6.36	0.75	1.32	99.25	98.68	581	1063	8	14	1055	1049	60	0.75
NMW615	POWNA524-10	JN893740	Herbarium	Caryophyllales	Polygonaceae	Persicaria	Persicaria_lapathifolia	1988	rbcL	rbcLa-F	rbcLr590	643	36	77	113	530	5	28	525	502	46	17.57	0.94	5.28	99.06	94.72	652	102	93	195	457	5	12	452	445	53	29.91	1.09	2.63	98.91	97.37	578	987	10	40	977	947	49	1.01
NMW2928	POWNA1061-12	JN890741	Herbarium	Caryophyllales	Polygonaceae	Persicaria	Persicaria_lapathifolia	1990	rbcL	rbcLa-F	rbcLr590	553	26	11	37	516	4	6	512	510	60	6.69	0.78	1.16	99.22	98.84	569	20	28	48	521	4	8	517	513	60	8.44	0.77	1.54	99.23	98.46	551	1037	8	14	1029	1023	60	0.77
NMW2929	POWNA1062-12	JN890742	Herbarium	Caryophyllales	Polygonaceae	Persicaria	Persicaria_lapathifolia	1990	rbcL	rbcLa-F	rbcLr590	569	29	11	40	529	4	5	525	524	60	7.03	0.76	0.95	99.24	99.05	567	12	27	39	528	4	6	524	522	59	6.88	0.76	1.14	99.24	98.86	573	1057	8	11	1049	1046	60	0.76
NMW616	POWNA525-10	JN893743	Herbarium	Caryophyllales	Polygonaceae	Persicaria	Persicaria_maculosa	1993	rbcL	rbcLa-F	rbcLr590	632	32	72	104	528	8	36	520	492	45	16.46	1.52	6.82	98.48	93.18	635	87	52	139	496	4	25	492	471	54	21.89	0.81	5.04	99.19	94.96	576	1024	12	61	1012	963	49	1.17
NMW2933	POWNA1732-12	JN893811	Herbarium	Caryophyllales	Polygonaceae	Persicaria	Persicaria_maculosa	2000	rbcL	rbcLa-F	rbcLr590	579	52	10	62	517	12	26	505	491	52	10.71	2.32	5.03	97.68	94.97	575	10	43	53	522	4	10	518	512	59	9.22	0.77	1.92	99.23	98.08	578	1039	16	36	1023	1003	56	1.54
NMW2932	POWNA3173-12	JN893812	Herbarium	Caryophyllales	Polygonaceae	Persicaria	Persicaria_maculosa	1993	rbcL	rbcLa-F	rbcLr590	563	26	14	40	523	4	9	519	514	59	7.1	0.76	1.72	99.24	98.28	571	12	31	43	528	4	10	524	518	59	7.53	0.76	1.89	99.24	98.11	569	1051	8	19	1043	1032	59	0.76
NMW617	POWNA526-10	JN893742	Herbarium	Caryophyllales	Polygonaceae	Persicaria	Persicaria_minor	2001	rbcL	rbcLa-F	rbcLr590	638	30	84	114	524	7	29	517	495	46	17.87	1.34	5.53	98.66	94.47	639	85	51	136	503	4	19	499	484	53	21.28	0.8	3.78	99.2	96.22	574	1027	11	48	1016	979	50	1.07
NMW2934	POWNA987-12	JN893818	Herbarium	Caryophyllales	Polygonaceae	Persicaria	Persicaria_minor	1992	rbcL	rbcLa-F	rbcLr590	565	30	13	43	522	4	12	518	510	59	7.61	0.77	2.3	99.23	97.7	568	11	33	44	524	4	10	520	514	59	7.75	0.76	1.91	99.24	98.09	572	1046	8	22	1038	1024	59	0.76
NMW2935	POWNA3098-12	JN893817	Herbarium	Caryophyllales	Polygonaceae	Persicaria	Persicaria_minor	1997	rbcL	rbcLa-F	rbcLr590	573	34	6	40	533	4	7	529	526	59	6.98	0.75	1.31	99.25	98.69	568	12	27	39	529	4	7	525	522	60	6.87	0.76	1.32	99.24	98.68	579	1062	8	14	1054	1048	60	0.75
NMW2938	POWNA1811-12	JN893822	Herbarium	Caryophyllales	Polygonaceae	Persicaria	Persicaria_mitis	1985	rbcL	rbcLa-F	rbcLr590	577	40	6	46	531	4	5	527	526	60	7.97	0.75	0.94	99.25	99.06	577	12	44	56	521	4	8	517	513	60	9.71	0.77	1.54	99.23	98.46	579	1052	8	13	1044	1039	60	0.76
NMW2937	POWNA3176-12	JN893815	Herbarium	Caryophyllales	Polygonaceae	Persicaria	Persicaria_mitis	1997	rbcL	rbcLa-F	rbcLr590	567	29	10	39	528	4	8	524	520	59	6.88	0.76	1.52	99.24	98.48	569	13	35	48	521	4	8	517	513	59	8.44	0.77	1.54	99.23	98.46	570	1049	8	16	1041	1033	59	0.76
NMW2936	POWNA1778-12	JN893816	Herbarium	Caryophyllales	Polygonaceae	Persicaria	Persicaria_mitis	1999	rbcL	rbcLa-F	rbcLr590	567	29	14	43	524	4	4	520	520	60	7.58	0.76	0.76	99.24	99.24	568	11	30	41	527	4	11	523	516	59	7.22	0.76	2.09	99.24	97.91	570	1051	8	15	1043	1036	59	0.76
NMW2941	POWNA3020-12	JN892317	Herbarium	Caryophyllales	Polygonaceae	Persicaria	Persicaria_vivipara	1960	rbcL	rbcLa-F	rbcLr590	566	25	14	39	527	14	20	513	507	57	6.89	2.66	3.8	97.34	96.2	568	14	29	43	525	6	17	519	508	58	7.57	1.14	3.24	98.86	96.76	568	1052	20	37	1032	1015	57	1.9
NMW5040	POWNB018-10	JN891572	Fresh	Caryophyllales	Polygonaceae	Persicaria	Persicaria_vivipara	2010	rbcL	rbcLa-F	rbcLr590	567	29	13	42	525	4	7	521	518	59	7.41	0.76	1.33	99.24	98.67	567	15	25	40	527	4	9	523	518	58	7.05	0.76	1.71	99.24	98.29	568	1052	8	16	1044	1036	59	0.76
NMW2940	POWNA3019-12	JN893588	Herbarium	Caryophyllales	Polygonaceae	Persicaria	Persicaria_vivipara	1987	rbcL	rbcLa-F	rbcLr590	562	26	9	35	527	4	9	523	518	59	6.23	0.76	1.71	99.24	98.29	568	8	29	37	531	4	11	527	520	59	6.51	0.75	2.07	99.25	97.93	575	1058	8	20	1050	1038	59	0.76
NMW2943	POWNA2118-12	JN893587	Herbarium	Caryophyllales	Polygonaceae	Polygonum	Polygonum_arenastrum	2004	rbcL	rbcLa-F	rbcLr590	553	27	0	27	526	4	11	522	515	59	4.88	0.76	2.09	99.24	97.91	570	24	27	51	519	4	6	515	513	59	8.95	0.77	1.16	99.23	98.84	562	1045	8	17	1037	1028	59	0.77
NMW2942	POWNA3017-12	JN893586	Herbarium	Caryophyllales	Polygonaceae	Polygonum	Polygonum_arenastrum	2007	rbcL	rbcLa-F	rbcLr590	554	29	6	35	519	4	10	515	509	59	6.32	0.77	1.93	99.23	98.07	567	17	24	41	526	4	11	522	515	59	7.23	0.76	2.09	99.24	97.91	561	1045	8	21	1037	1024	59	0.77
NMW5191	POWNB073-10	JN892493	Fresh	Caryophyllales	Polygonaceae	Polygonum	Polygonum_arenastrum	2010	rbcL	rbcLa-F	rbcLr590	554	26	2	28	526	5	9	521	517	58	5.05	0.95	1.71	99.05	98.29	567	12	25	37	530	4	8	526	522	58	6.53	0.75	1.51	99.25	98.49	571	1056	9	17	1047	1039	58	0.85
NMW2945	POWNA3016-12	JN892306	Herbarium	Caryophyllales	Polygonaceae	Polygonum	Polygonum_aviculare	1983	rbcL	rbcLa-F	rbcLr590	675	28	119	147	528	4	12	524	516	56	21.78	0.76	2.27	99.24	97.73	566	9	27	36	530	4	9	526	521	59	6.36	0.75	1.7	99.25	98.3	575	1058	8	21	1050	1037	58	0.76
NMW5201	POWNB074-10	JN892484	Fresh	Caryophyllales	Polygonaceae	Polygonum	Polygonum_aviculare	2010	rbcL	rbcLa-F	rbcLr590	567	29	13	42	525	4	11	521	514	58	7.41	0.76	2.1	99.24	97.9	566	10	20	30	536	4	16	532	520	58	5.3	0.75	2.99	99.25	97.01	574	1061	8	27	1053	1034	58	0.75
NMW648	POWNA549-10	JN891125	Herbarium	Caryophyllales	Polygonaceae	Polygonum	Polygonum_oxyspermum	2003	rbcL	rbcLa-F	rbcLr590	638	31	82	113	525	9	64	516	461	43	17.71	1.71	12.19	98.29	87.81	716	162	96	258	458	5	24	453	434	44	36.03	1.09	5.24	98.91	94.76	575	983	14	88	969	895	43	1.42
NMW2950	POWNA2893-12	JN893391	Herbarium	Caryophyllales	Polygonaceae	Polygonum	Polygonum_oxyspermum	1998	rbcL	rbcLa-F	rbcLr590	573	40	8	48	525	4	8	521	517	59	8.38	0.76	1.52	99.24	98.48	572	12	35	47	525	4	10	521	515	59	8.22	0.76	1.9	99.24	98.1	581	1050	8	18	1042	1032	59	0.76
NMW2949	POWNA3027-12	JN893596	Herbarium	Caryophyllales	Polygonaceae	Polygonum	Polygonum_oxyspermum	2000	rbcL	rbcLa-F	rbcLr590	570	34	5	39	531	4	8	527	523	59	6.84	0.75	1.51	99.25	98.49	570	9	33	42	528	4	10	524	518	58	7.37	0.76	1.89	99.24	98.11	582	1059	8	18	1051	1041	58	0.76
NMW649	POWNA550-10	JN891126	Herbarium	Caryophyllales	Polygonaceae	Polygonum	Polygonum_rurivagum	2000	rbcL	rbcLa-F	rbcLr590	640	29	92	121	519	5	37	514	482	46	18.91	0.96	7.13	99.04	92.87	634	88	26	114	520	4	16	516	504	52	17.98	0.77	3.08	99.23	96.92	565	1039	9	53	1030	986	49	0.87
NMW2951	POWNA2892-12	JN893390	Herbarium	Caryophyllales	Polygonaceae	Polygonum	Polygonum_rurivagum	1990	rbcL	rbcLa-F	rbcLr590	578	42	8	50	528	4	7	524	521	58	8.65	0.76	1.33	99.24	98.67	575	13	41	54	521	4	8	517	513	60	9.39	0.77	1.54	99.23	98.46	578	1049	8	15	1041	1034	59	0.76
NMW2952	POWNA2895-12	JN893393	Herbarium	Caryophyllales	Polygonaceae	Polygonum	Polygonum_rurivagum	1989	rbcL	rbcLa-F	rbcLr590	577	51	7	58	519	9	22	510	497	53	10.05	1.73	4.24	98.27	95.76	570	0	50	50	520	9	41	511	479	45	8.77	1.73	7.88	98.27	92.12	590	1039	18	63	1021	976	49	1.73
NMW2958	POWNA2888-12	JN893386	Herbarium	Caryophyllales	Polygonaceae	Rumex	Rumex_acetosa	1980	rbcL	rbcLa-F	rbcLr590	578	37	7	44	534	9	15	525	519	58	7.61	1.69	2.81	98.31	97.19	571	13	37	50	521	10	11	511	510	59	8.76	1.92	2.11	98.08	97.89	580	1055	19	26	1036	1029	59	1.8
NMW6182	POWNA2137-12	JN892337	Fresh	Caryophyllales	Polygonaceae	Rumex	Rumex_acetosa	2011	rbcL	rbcLa-F	rbcLr590	570	18	6	24	546	4	18	542	528	57	4.21	0.73	3.3	99.27	96.7	569	13	28	41	528	4	7	524	521	60	7.21	0.76	1.33	99.24	98.67	576	1074	8	25	1066	1049	58	0.74
NMW2957	POWNA2898-12	JN893396	Herbarium	Caryophyllales	Polygonaceae	Rumex	Rumex_acetosa	1993	rbcL	rbcLa-F	rbcLr590	568	28	11	39	529	4	8	525	521	59	6.87	0.76	1.51	99.24	98.49	567	15	24	39	528	4	9	524	519	59	6.88	0.76	1.7	99.24	98.3	571	1057	8	17	1049	1040	59	0.76
NBGW7289	POWNA2290-12	JN892576	Fresh	Caryophyllales	Polygonaceae	Rumex	Rumex_acetosa	2011	rbcL	rbcLa-F	rbcLr590	566	30	8	38	528	4	8	524	520	59	6.71	0.76	1.52	99.24	98.48	567	14	25	39	528	4	8	524	520	59	6.88	0.76	1.52	99.24	98.48	572	1056	8	16	1048	1040	59	0.76
NMW2961	POWNA2695-12	JN893123	Herbarium	Caryophyllales	Polygonaceae	Rumex	Rumex_acetosella	1978	rbcL	rbcLa-F	rbcLr590	567	25	8	33	534	5	17	529	517	55	5.82	0.94	3.18	99.06	96.82	575	20	32	52	523	4	7	519	516	59	9.04	0.76	1.34	99.24	98.66	569	1057	9	24	1048	1033	57	0.85
NMW5030	POWNB025-10	JN893152	Fresh	Caryophyllales	Polygonaceae	Rumex	Rumex_acetosella	2010	rbcL	rbcLa-F	rbcLr590	567	30	9	39	528	4	15	524	513	59	6.88	0.76	2.84	99.24	97.16	570	14	35	49	521	4	9	517	512	57	8.6	0.77	1.73	99.23	98.27	572	1049	8	24	1041	1025	58	0.76
NMW6237	POWNA1020-12	JN893332	Fresh	Caryophyllales	Polygonaceae	Rumex	Rumex_acetosella	2011	rbcL	rbcLa-F	rbcLr590	567	29	10	39	528	4	7	524	521	58	6.88	0.76	1.33	99.24	98.67	570	5	32	37	533	4	14	529	519	59	6.49	0.75	2.63	99.25	97.37	581	1061	8	21	1053	1040	59	0.75
NMW830	POWNA617-10	JN891402	Herbarium	Caryophyllales	Polygonaceae	Rumex	Rumex_conglomeratus	1990	rbcL	rbcLa-F	rbcLr590	639	49	84	133	506	10	50	496	456	42	20.81	1.98	9.88	98.02	90.12	656	110	91	201	455	5	22	450	433	46	30.64	1.1	4.84	98.9	95.16	567	961	15	72	946	889	44	1.56
NMW2963	POWNA2697-12	JN893125	Herbarium	Caryophyllales	Polygonaceae	Rumex	Rumex_conglomeratus	1987	rbcL	rbcLa-F	rbcLr590	574	54	6	60	514	4	6	510	508	59	10.45	0.78	1.17	99.22	98.83	572	10	45	55	517	4	13	513	504	55	9.62	0.77	2.51	99.23	97.49	581	1031	8	19	1023	1012	57	0.78
NMW6371	POWNA1317-12	JN891137	Fresh	Caryophyllales	Polygonaceae	Rumex	Rumex_conglomeratus	2011	rbcL	rbcLa-F	rbcLr590	563	24	14	38	525	4	9	521	516	54	6.75	0.76	1.71	99.24	98.29	565	7	27	34	531	4	13	527	518	59	6.02	0.75	2.45	99.25	97.55	571	1056	8	22	1048	1034	57	0.76
NMW2962	POWNA2696-12	JN892847	Herbarium	Caryophyllales	Polygonaceae	Rumex	Rumex_conglomeratus	1995	rbcL	rbcLa-F	rbcLr590	568	28	6	34	534	4	10	530	524	59	5.99	0.75	1.87	99.25	98.13	569	5	29	34	535	4	12	531	523	59	5.98	0.75	2.24	99.25	97.76	583	1069	8	22	1061	1047	59	0.75
NMW2964	POWNA2691-12	JN893119	Herbarium	Caryophyllales	Polygonaceae	Rumex	Rumex_crispus	1983	rbcL	rbcLa-F	rbcLr590	570	38	19	57	513	5	14	508	499	57	10	0.97	2.73	99.03	97.27	566	23	43	66	500	5	21	495	479	51	11.66	1	4.2	99	95.8	553	1013	10	35	1003	978	54	0.99
NMW2965	POWNA2692-12	JN893120	Herbarium	Caryophyllales	Polygonaceae	Rumex	Rumex_crispus	1992	rbcL	rbcLa-F	rbcLr590	573	34	9	43	530	6	12	524	518	58	7.5	1.13	2.26	98.87	97.74	571	12	38	50	521	4	5	517	516	60	8.76	0.77	0.96	99.23	99.04	575	1051	10	17	1041	1034	59	0.95
NMW831	POWNA618-10	JN891401	Herbarium	Caryophyllales	Polygonaceae	Rumex	Rumex_crispus	2003	rbcL	rbcLa-F	rbcLr590	550	30	3	33	517	6	41	511	476	43	6	1.16	7.93	98.84	92.07	548	0	25	25	523	4	18	519	505	52	4.56	0.76	3.44	99.24	96.56	568	1040	10	59	1030	981	48	0.96
NMW2966	POWNA2693-12	JN893121	Herbarium	Caryophyllales	Polygonaceae	Rumex	Rumex_hydrolapathum	1987	rbcL	rbcLa-F	rbcLr590	688	42	120	162	526	5	14	521	512	53	23.55	0.95	2.66	99.05	97.34	576	13	42	55	521	4	8	517	513	59	9.55	0.77	1.54	99.23	98.46	577	1047	9	22	1038	1025	56	0.86
NMW2968	POWNA2687-12	JN893115	Herbarium	Caryophyllales	Polygonaceae	Rumex	Rumex_hydrolapathum	1979	rbcL	rbcLa-F	rbcLr590	569	30	5	35	534	4	8	530	526	59	6.15	0.75	1.5	99.25	98.5	570	10	38	48	522	4	7	518	515	59	8.42	0.77	1.34	99.23	98.66	578	1056	8	15	1048	1041	59	0.76
NMW862	POWNA619-10	JN892145	Herbarium	Caryophyllales	Polygonaceae	Rumex	Rumex_hydrolapathum	1997	rbcL	rbcLa-F	rbcLr590	565	28	18	46	519	4	29	515	490	45	8.14	0.77	5.59	99.23	94.41	561	20	26	46	515	13	95	502	420	43	8.2	2.52	18.45	97.48	81.55	562	1034	17	124	1017	910	44	1.64
NMW2967	POWNA2694-12	JN893122	Herbarium	Caryophyllales	Polygonaceae	Rumex	Rumex_hydrolapathum	1982	rbcL	rbcLa-F	rbcLr590	569	33	6	39	530	4	23	526	507	52	6.85	0.75	4.34	99.25	95.66	570	11	32	43	527	10	17	517	510	54	7.54	1.9	3.23	98.1	96.77	577	1057	14	40	1043	1017	53	1.32
NMW5203	POWNB079-10	JN892486	Fresh	Caryophyllales	Polygonaceae	Rumex	Rumex_hydrolapathum	2010	rbcL	rbcLa-F	rbcLr590	565	25	11	36	529	7	19	522	510	54	6.37	1.32	3.59	98.68	96.41	568	11	26	37	531	4	10	527	521	56	6.51	0.75	1.88	99.25	98.12	576	1060	11	29	1049	1031	55	1.04
NMW832	POWNA620-10	JN891404	Herbarium	Caryophyllales	Polygonaceae	Rumex	Rumex_maritimus	1988	rbcL	rbcLa-F	rbcLr590	639	28	89	117	522	5	54	517	468	43	18.31	0.96	10.34	99.04	89.66	681	127	54	181	500	5	40	495	460	44	26.58	1	8	99	92	572	1022	10	94	1012	928	43	0.98
NMW2970	POWNA1596-12	JN892880	Herbarium	Caryophyllales	Polygonaceae	Rumex	Rumex_maritimus	1963	rbcL	rbcLa-F	rbcLr590	573	50	0	50	523	3	7	520	516	58	8.73	0.57	1.34	99.43	98.66	578	11	57	68	510	9	49	501	461	46	11.76	1.76	9.61	98.24	90.39	585	1033	12	56	1021	977	52	1.16
NMW2969	POWNA2688-12	JN893116	Herbarium	Caryophyllales	Polygonaceae	Rumex	Rumex_maritimus	2001	rbcL	rbcLa-F	rbcLr590	576	36	11	47	529	6	11	523	518	57	8.16	1.13	2.08	98.87	97.92	569	10	33	43	526	6	11	520	515	59	7.56	1.14	2.09	98.86	97.91	577	1055	12	22	1043	1033	58	1.14
NMW872	POWNA621-10	JN892350	Herbarium	Caryophyllales	Polygonaceae	Rumex	Rumex_obtusifolius	1986	rbcL	rbcLa-F	rbcLr590	638	31	86	117	521	6	27	515	494	46	18.34	1.15	5.18	98.85	94.82	643	94	46	140	503	5	14	498	489	52	21.77	0.99	2.78	99.01	97.22	571	1024	11	41	1013	983	49	1.07
NMW2971	POWNA2515-12	JN892879	Herbarium	Caryophyllales	Polygonaceae	Rumex	Rumex_obtusifolius	1982	rbcL	rbcLa-F	rbcLr590	575	47	7	54	521	4	10	517	511	56	9.39	0.77	1.92	99.23	98.08	575	11	45	56	519	4	12	515	507	60	9.74	0.77	2.31	99.23	97.69	580	1040	8	22	1032	1018	58	0.77
NMW2972	POWNA2514-12	JN892878	Herbarium	Caryophyllales	Polygonaceae	Rumex	Rumex_obtusifolius	1988	rbcL	rbcLa-F	rbcLr590	568	29	7	36	532	4	7	528	525	60	6.34	0.75	1.32	99.25	98.68	572	10	31	41	531	4	5	527	526	60	7.17	0.75	0.94	99.25	99.06	580	1063	8	12	1055	1051	60	0.75
NMW6191	POWNA1991-12	JN892129	Fresh	Caryophyllales	Polygonaceae	Rumex	Rumex_obtusifolius	2011	rbcL	rbcLa-F	rbcLr590	569	30	10	40	529	4	8	525	521	58	7.03	0.76	1.51	99.24	98.49	567	8	28	36	531	4	10	527	521	59	6.35	0.75	1.88	99.25	98.12	579	1060	8	18	1052	1042	59	0.75
NMW2975	POWNA1587-12	JN892875	Herbarium	Caryophyllales	Polygonaceae	Rumex	Rumex_palustris	1986	rbcL	rbcLa-F	rbcLr590	577	41	13	54	523	4	14	519	509	57	9.36	0.76	2.68	99.24	97.32	568	12	31	43	525	4	7	521	518	60	7.57	0.76	1.33	99.24	98.67	573	1048	8	21	1040	1027	58	0.76
NMW2973	POWNA2632-12	JN892877	Herbarium	Caryophyllales	Polygonaceae	Rumex	Rumex_palustris	1999	rbcL	rbcLa-F	rbcLr590	567	29	8	37	530	4	9	526	521	57	6.53	0.75	1.7	99.25	98.3	566	13	25	38	528	4	7	524	521	59	6.71	0.76	1.33	99.24	98.67	573	1058	8	16	1050	1042	58	0.76
NMW2974	POWNA2512-12	JN892876	Herbarium	Caryophyllales	Polygonaceae	Rumex	Rumex_palustris	1980	rbcL	rbcLa-F	rbcLr590	564	28	11	39	525	4	6	521	519	59	6.91	0.76	1.14	99.24	98.86	567	12	25	37	530	4	7	526	523	59	6.53	0.75	1.32	99.25	98.68	570	1055	8	13	1047	1042	59	0.76
NMW871	POWNA622-10	JN892347	Herbarium	Caryophyllales	Polygonaceae	Rumex	Rumex_pulcher	1977	rbcL	rbcLa-F	rbcLr590	638	51	83	134	504	5	37	499	467	45	21	0.99	7.34	99.01	92.66	631	87	87	174	457	5	50	452	407	43	27.58	1.09	10.94	98.91	89.06	575	961	10	87	951	874	44	1.04
NMW2976	POWNA2510-12	JN892874	Herbarium	Caryophyllales	Polygonaceae	Rumex	Rumex_pulcher	1943	rbcL	rbcLa-F	rbcLajf634R	1050	137	439	576	474	10	48	464	426	44	54.86	2.11	10.13	97.89	89.87	629	13	53	66	563	33	79	530	484	51	10.49	5.86	14.03	94.14	85.97	629	1037	43	127	994	910	48	4.15
NMW870	POWNA875-10	JN892348	Herbarium	Caryophyllales	Polygonaceae	Rumex	Rumex_rupestris	1977	rbcL	rbcLa-F	rbcLr506	559	81	82	163	396	13	49	383	347	48	29.16	3.28	12.37	96.72	87.63	950	482	57	539	411	9	40	402	371	51	56.74	2.19	9.73	97.81	90.27	489	807	22	89	785	718	49	2.73
NMW2978	POWNA2508-12	JN892872	Herbarium	Caryophyllales	Polygonaceae	Rumex	Rumex_rupestris	1939	rbcL	rbcLa-F	rbcLr590	570	30	31	61	509	22	88	487	421	40	10.7	4.32	17.29	95.68	82.71	571	12	35	47	524	4	12	520	512	52	8.23	0.76	2.29	99.24	97.71	552	1033	26	100	1007	933	46	2.52
NMW5152	POWNB053-10	JN892044	Fresh	Caryophyllales	Polygonaceae	Rumex	Rumex_rupestris	2010	rbcL	rbcLa-F	rbcLr590	567	30	8	38	529	4	8	525	521	59	6.7	0.76	1.51	99.24	98.49	567	11	26	37	530	4	9	526	521	60	6.53	0.75	1.7	99.25	98.3	576	1059	8	17	1051	1042	59	0.76
NMW869	POWNA623-10	JN892149	Herbarium	Caryophyllales	Polygonaceae	Rumex	Rumex_sanguineus	1999	rbcL	rbcLa-F	rbcLr590	640	31	88	119	521	7	55	514	466	43	18.59	1.34	10.56	98.66	89.44	640	88	55	143	497	5	23	492	474	50	22.34	1.01	4.63	98.99	95.37	570	1018	12	78	1006	940	46	1.18
NMW2982	POWNA2360-12	JN892658	Herbarium	Caryophyllales	Polygonaceae	Rumex	Rumex_sanguineus	1982	rbcL	rbcLa-F	rbcLr590	578	42	27	69	509	4	9	505	500	57	11.94	0.79	1.77	99.21	98.23	573	11	40	51	522	4	6	518	516	60	8.9	0.77	1.15	99.23	98.85	559	1031	8	15	1023	1016	59	0.78
NMW2981	POWNA2900-12	JN892660	Herbarium	Caryophyllales	Polygonaceae	Rumex	Rumex_sanguineus	1993	rbcL	rbcLa-F	rbcLr590	571	30	9	39	532	4	9	528	523	60	6.83	0.75	1.69	99.25	98.31	574	12	32	44	530	4	7	526	523	59	7.67	0.75	1.32	99.25	98.68	579	1062	8	16	1054	1046	60	0.75
NMW6370	POWNA1318-12	JN891138	Fresh	Caryophyllales	Polygonaceae	Rumex	Rumex_sanguineus	2011	rbcL	rbcLa-F	rbcLr590	562	25	15	40	522	4	8	518	514	57	7.12	0.77	1.53	99.23	98.47	568	12	27	39	529	4	9	525	520	59	6.87	0.76	1.7	99.24	98.3	568	1051	8	17	1043	1034	58	0.76
NMW4138	POWNA2257-12	JN892518	Herbarium	Celastrales	Celastraceae	Euonymus	Euonymus_europaeus	1993	rbcL	rbcLa-F	rbcLr590	571	33	5	38	533	4	6	529	527	60	6.65	0.75	1.13	99.25	98.87	568	12	29	41	527	4	5	523	522	60	7.22	0.76	0.95	99.24	99.05	579	1060	8	11	1052	1049	60	0.75
NMW320	POWNA260-10	JN891101	Herbarium	Celastrales	Celastraceae	Euonymus	Euonymus_europaeus	1998	rbcL	rbcLa-F	rbcLr590	554	17	14	31	523	4	10	519	513	58	5.6	0.76	1.91	99.24	98.09	564	19	20	39	525	4	15	521	510	58	6.91	0.76	2.86	99.24	97.14	565	1048	8	25	1040	1023	58	0.76
NMW608	POWNA517-10	JN893512	Herbarium	Celastrales	Parnassiaceae	Parnassia	Parnassia_palustris	1986	rbcL	rbcLa-F	rbcLr590	839	30	289	319	520	8	23	512	497	51	38.02	1.54	4.42	98.46	95.58	840	298	31	329	511	4	12	507	499	57	39.17	0.78	2.35	99.22	97.65	563	1031	12	35	1019	996	54	1.16
NMW4571	POWNA1926-12	JN892056	Herbarium	Celastrales	Parnassiaceae	Parnassia	Parnassia_palustris	1956	rbcL	rbcLa-F	rbcLr590	575	42	4	46	529	4	6	525	523	60	8	0.76	1.13	99.24	98.87	573	6	39	45	528	4	9	524	519	60	7.85	0.76	1.7	99.24	98.3	585	1057	8	15	1049	1042	60	0.76
NMW4572	POWNA1928-12	JN892761	Herbarium	Celastrales	Parnassiaceae	Parnassia	Parnassia_palustris	1951	rbcL	rbcLa-F	rbcLr590	562	25	8	33	529	4	6	525	523	60	5.87	0.76	1.13	99.24	98.87	568	12	30	42	526	4	7	522	519	60	7.39	0.76	1.33	99.24	98.67	576	1055	8	13	1047	1042	60	0.76
NMW3923	POWNA1296-12	JN891780	Herbarium	Ceratophyllales	Ceratopyllaceae	Ceratophyllum	Ceratophyllum_demersum	2000	rbcL	rbcLa-F	rbcLr590	565	29	13	42	523	4	4	519	519	60	7.43	0.76	0.76	99.24	99.24	572	11	37	48	524	4	6	520	518	60	8.39	0.76	1.15	99.24	98.85	571	1047	8	10	1039	1037	60	0.76
NMW3922	POWNA1743-12	JN891781	Herbarium	Ceratophyllales	Ceratopyllaceae	Ceratophyllum	Ceratophyllum_demersum	2003	rbcL	rbcLa-F	rbcLr590	560	25	1	26	534	4	10	530	524	59	4.64	0.75	1.87	99.25	98.13	562	13	24	37	525	4	6	521	519	60	6.58	0.76	1.14	99.24	98.86	579	1059	8	16	1051	1043	60	0.76
NMW199	POWNA164-10	JN892592	Herbarium	Ceratophyllales	Ceratopyllaceae	Ceratophyllum	Ceratophyllum_demersum	2004	rbcL	rbcLa-F	rbcLr590	553	21	5	26	527	12	18	515	509	57	4.7	2.28	3.42	97.72	96.58	563	13	20	33	530	12	23	518	507	56	5.86	2.26	4.34	97.74	95.66	570	1057	24	41	1033	1016	57	2.27
NMW198	POWNA165-10	JN892591	Herbarium	Ceratophyllales	Ceratopyllaceae	Ceratophyllum	Ceratophyllum_submersum	2003	rbcL	rbcLa-F	rbcLr590	618	25	77	102	516	11	15	505	501	57	16.5	2.13	2.91	97.87	97.09	623	73	21	94	529	12	19	517	510	55	15.09	2.27	3.59	97.73	96.41	569	1045	23	34	1022	1011	56	2.2
NMW3924	POWNA1742-12	JN891779	Herbarium	Ceratophyllales	Ceratopyllaceae	Ceratophyllum	Ceratophyllum_submersum	1999	rbcL	rbcLa-F	rbcLr590	569	31	8	39	530	4	6	526	524	60	6.85	0.75	1.13	99.25	98.87	572	6	31	37	535	4	6	531	529	59	6.47	0.75	1.12	99.25	98.88	585	1065	8	12	1057	1053	60	0.75
NMW3925	POWNA1293-12	JN891778	Herbarium	Ceratophyllales	Ceratopyllaceae	Ceratophyllum	Ceratophyllum_submersum	1993	rbcL	rbcLa-F	rbcLr590	563	29	7	36	527	4	4	523	523	59	6.39	0.76	0.76	99.24	99.24	565	9	24	33	532	4	11	528	521	59	5.84	0.75	2.07	99.25	97.93	576	1059	8	15	1051	1044	59	0.76
NMW238	POWNA195-10	JN893154	Herbarium	Cornales	Cornaceae	Cornus	Cornus_sanguinea	1978	rbcL	rbcLa-F	rbcLr590	564	23	16	39	525	10	14	515	511	57	6.91	1.9	2.67	98.1	97.33	641	90	74	164	477	4	8	473	469	56	25.59	0.84	1.68	99.16	98.32	572	1002	14	22	988	980	56	1.4
NMW4141	POWNA1471-12	JN891357	Herbarium	Cornales	Cornaceae	Cornus	Cornus_sanguinea	1999	rbcL	rbcLa-F	rbcLajf634R	629	26	19	45	584	10	51	574	533	44	7.15	1.71	8.73	98.29	91.27	632	15	35	50	582	4	9	578	573	59	7.91	0.69	1.55	99.31	98.45	626	1166	14	60	1152	1106	51	1.2
NMW6154	POWNA1345-12	JN891181	Fresh	Cornales	Cornaceae	Cornus	Cornus_sanguinea	2011	rbcL	rbcLa-F	rbcLr590	567	28	5	33	534	4	9	530	525	58	5.82	0.75	1.69	99.25	98.31	569	6	33	39	530	4	5	526	525	59	6.85	0.75	0.94	99.25	99.06	583	1064	8	14	1056	1050	58	0.75
NMW105	POWNA087-10	JN890977	Herbarium	Cucurbitales	Cucurbitaceae	Bryonia	Bryonia_dioica	1967	rbcL	rbcLa-F	rbcLr590	639	36	93	129	510	12	22	498	488	56	20.19	2.35	4.31	97.65	95.69	619	69	28	97	522	14	22	508	500	55	15.67	2.68	4.21	97.32	95.79	572	1032	26	44	1006	988	56	2.52
NMW3718	POWNA1825-12	JN891924	Herbarium	Cucurbitales	Cucurbitaceae	Bryonia	Bryonia_dioica	1982	rbcL	rbcLa-F	rbcLa-R	572	31	18	49	523	4	6	519	517	58	8.57	0.76	1.15	99.24	98.85	575	12	40	52	523	4	7	519	516	60	9.04	0.76	1.34	99.24	98.66	574	1046	8	13	1038	1033	59	0.76
NMW3719	POWNA1826-12	JN891925	Herbarium	Cucurbitales	Cucurbitaceae	Bryonia	Bryonia_dioica	1949	rbcL	rbcLa-F	rbcLr590	569	32	4	36	533	4	4	529	529	60	6.33	0.75	0.75	99.25	99.25	567	10	28	38	529	4	8	525	521	59	6.7	0.76	1.51	99.24	98.49	580	1062	8	12	1054	1050	60	0.75
NMW999	POWNA742-10	JN892560	Herbarium	Dioscoreales	Dioscoreaceae	Tamus	Tamus_communis	2004	rbcL	rbcLa-F	rbcLr590	548	89	2	91	457	11	33	446	424	54	16.61	2.41	7.22	97.59	92.78	564	15	26	41	523	10	18	513	505	54	7.27	1.91	3.44	98.09	96.56	567	980	21	51	959	929	54	2.14
NMW3780	POWNA2690-12	JN893118	Herbarium	Dioscoreales	Dioscoreaceae	Tamus	Tamus_communis	1962	rbcL	rbcLa-F	rbcLr590	576	58	4	62	514	5	12	509	502	56	10.76	0.97	2.33	99.03	97.67	572	1	40	41	531	4	7	527	524	60	7.17	0.75	1.32	99.25	98.68	587	1045	9	19	1036	1026	58	0.86
NMW6323	POWNA2573-12	JN893751	Fresh	Dioscoreales	Dioscoreaceae	Tamus	Tamus_communis	2011	rbcL	rbcLa-F	rbcLr590	564	28	1	29	535	4	8	531	527	58	5.14	0.75	1.5	99.25	98.5	568	13	26	39	529	4	9	525	520	60	6.87	0.76	1.7	99.24	98.3	580	1064	8	17	1056	1047	59	0.75
NMW3781	POWNA2689-12	JN893117	Herbarium	Dioscoreales	Dioscoreaceae	Tamus	Tamus_communis	2009	rbcL	rbcLa-F	rbcLr590	564	16	1	17	547	5	14	542	533	58	3.01	0.91	2.56	99.09	97.44	564	12	24	36	528	4	8	524	520	60	6.38	0.76	1.52	99.24	98.48	580	1075	9	22	1066	1053	59	0.84
NMW569	POWNA492-10	JN890810	Herbarium	Dioscoreales	Nartheciaceae	Narthecium	Narthecium_ossifragum	2002	rbcL	rbcLa-F	rbcLr590	645	27	97	124	521	5	42	516	479	44	19.22	0.96	8.06	99.04	91.94	607	59	25	84	523	4	10	519	513	56	13.84	0.76	1.91	99.24	98.09	568	1044	9	52	1035	992	50	0.86
NMW3818	POWNA3049-12	JN891743	Herbarium	Dioscoreales	Nartheciaceae	Narthecium	Narthecium_ossifragum	1968	rbcL	rbcLa-F	rbcLr590	567	38	0	38	529	3	11	526	518	55	6.7	0.57	2.08	99.43	97.92	570	10	38	48	522	9	19	513	503	56	8.42	1.72	3.64	98.28	96.36	585	1051	12	30	1039	1021	56	1.14
NMW6244	POWNA2303-12	JN892602	Fresh	Dioscoreales	Nartheciaceae	Narthecium	Narthecium_ossifragum	2011	rbcL	rbcLa-F	rbcLr590	563	28	3	31	532	4	9	528	523	58	5.51	0.75	1.69	99.25	98.31	568	9	29	38	530	4	5	526	525	60	6.69	0.75	0.94	99.25	99.06	580	1062	8	14	1054	1048	59	0.75
NMW006	POWNA006-10	JN891274	Herbarium	Dipsacales	Adoxaceae	Adoxa	Adoxa_moschatellina	1993	rbcL	rbcLa-F	rbcLr590	613	24	71	95	518	5	16	513	502	56	15.5	0.97	3.09	99.03	96.91	621	72	17	89	532	8	28	524	504	55	14.33	1.5	5.26	98.5	94.74	570	1050	13	44	1037	1006	55	1.24
NMW2338	POWNA3153-12	JN893793	Herbarium	Dipsacales	Adoxaceae	Adoxa	Adoxa_moschatellina	1963	rbcL	rbcLa-F	rbcLr590	576	43	4	47	529	4	7	525	522	60	8.16	0.76	1.32	99.24	98.68	571	6	38	44	527	4	9	523	518	59	7.71	0.76	1.71	99.24	98.29	585	1056	8	16	1048	1040	59	0.76
NMW2337	POWNA3157-12	JN893796	Herbarium	Dipsacales	Adoxaceae	Adoxa	Adoxa_moschatellina	1999	rbcL	rbcLa-F	rbcLr590	569	31	10	41	528	11	24	517	504	50	7.21	2.08	4.55	97.92	95.45	568	12	27	39	529	4	10	525	519	59	6.87	0.76	1.89	99.24	98.11	574	1057	15	34	1042	1023	55	1.42
NMW2339	POWNA3152-12	JN893792	Herbarium	Dipsacales	Caprifoliaceae	Lonicera	Lonicera_periclymenum	1990	rbcL	rbcLa-F	rbcLr590	566	31	17	48	518	4	6	514	512	59	8.48	0.77	1.16	99.23	98.84	572	12	60	72	500	4	6	496	494	60	12.59	0.8	1.2	99.2	98.8	568	1018	8	12	1010	1006	59	0.79
NMW6219	POWNA3139-12	JN893463	Fresh	Dipsacales	Caprifoliaceae	Lonicera	Lonicera_periclymenum	2011	rbcL	rbcLa-F	rbcLr590	567	29	10	39	528	4	7	524	521	59	6.88	0.76	1.33	99.24	98.67	562	14	22	36	526	4	7	522	519	59	6.41	0.76	1.33	99.24	98.67	572	1054	8	14	1046	1040	59	0.76
NBGW3030	POWNA435-10	JN893710	Fresh	Dipsacales	Caprifoliaceae	Lonicera	Lonicera_periclymenum	2008	rbcL	rbcLa-F	rbcLr590	555	18	14	32	523	12	15	511	508	57	5.77	2.29	2.87	97.71	97.13	565	17	18	35	530	10	18	520	512	57	6.19	1.89	3.4	98.11	96.6	567	1053	22	33	1031	1020	57	2.09
NMW6203	POWNA2987-12	JN890985	Fresh	Dipsacales	Caprifoliaceae	Lonicera	Lonicera_periclymenum	2011	rbcL	rbcLa-F	rbcLr590	570	33	5	38	532	4	11	528	521	52	6.67	0.75	2.07	99.25	97.93	568	12	23	35	533	4	10	529	523	59	6.16	0.75	1.88	99.25	98.12	579	1065	8	21	1057	1044	56	0.75
NMW2340	POWNA2348-12	JN891806	Herbarium	Dipsacales	Caprifoliaceae	Lonicera	Lonicera_periclymenum	1977	rbcL	rbcLa-F	rbcLr590	569	33	6	39	530	4	6	526	524	60	6.85	0.75	1.13	99.25	98.87	568	5	27	32	536	4	12	532	524	59	5.63	0.75	2.24	99.25	97.76	584	1066	8	18	1058	1048	60	0.75
NMW763	POWNA650-10	JN893720	Herbarium	Dipsacales	Caprifoliaceae	Sambucus	Sambucus_ebulus	1969	rbcL	rbcLa-F	rbcLr590	638	76	89	165	473	4	11	469	462	55	25.86	0.85	2.33	99.15	97.67	629	82	73	155	474	5	20	469	454	49	24.64	1.05	4.22	98.95	95.78	572	947	9	31	938	916	52	0.95
NMW2342	POWNA2841-12	JN893334	Herbarium	Dipsacales	Caprifoliaceae	Sambucus	Sambucus_ebulus	1983	rbcL	rbcLa-F	rbcLr590	570	32	10	42	528	5	11	523	517	55	7.37	0.95	2.08	99.05	97.92	571	12	30	42	529	4	13	525	516	59	7.36	0.76	2.46	99.24	97.54	574	1057	9	24	1048	1033	57	0.85
NMW2341	POWNA2349-12	JN890911	Herbarium	Dipsacales	Caprifoliaceae	Sambucus	Sambucus_ebulus	1957	rbcL	rbcLa-F	rbcLr590	570	35	4	39	531	4	4	527	527	60	6.84	0.75	0.75	99.25	99.25	571	12	29	41	530	4	8	526	522	60	7.18	0.75	1.51	99.25	98.49	579	1061	8	12	1053	1049	60	0.75
NMW2344	POWNA2344-12	JN891794	Herbarium	Dipsacales	Caprifoliaceae	Sambucus	Sambucus_nigra	1990	rbcL	rbcLa-F	rbcLr590	569	30	18	48	521	5	10	516	511	54	8.44	0.96	1.92	99.04	98.08	569	12	28	40	529	4	9	525	520	58	7.03	0.76	1.7	99.24	98.3	569	1050	9	19	1041	1031	56	0.86
NBGW3034	POWNA651-10	JN893713	Fresh	Dipsacales	Caprifoliaceae	Sambucus	Sambucus_nigra	2008	rbcL	rbcLa-F	rbcLr590	560	73	15	88	472	4	13	468	459	54	15.71	0.85	2.75	99.15	97.25	552	16	15	31	521	6	23	515	498	53	5.62	1.15	4.41	98.85	95.59	565	993	10	36	983	957	54	1.01
NMW2343	POWNA2843-12	JN893335	Herbarium	Dipsacales	Caprifoliaceae	Sambucus	Sambucus_nigra	1999	rbcL	rbcLa-F	rbcLr590	569	33	3	36	533	4	6	529	527	58	6.33	0.75	1.13	99.25	98.87	571	3	28	31	540	4	7	536	533	59	5.43	0.74	1.3	99.26	98.7	591	1073	8	13	1065	1060	59	0.75
NMW931	POWNA807-10	JN891679	Herbarium	Dipsacales	Caprifoliaceae	Viburnum	Viburnum_lantana	1998	rbcL	rbcLa-F	rbcLr590	621	45	66	111	510	8	17	502	493	56	17.87	1.57	3.33	98.43	96.67	647	101	17	118	529	11	19	518	510	55	18.24	2.08	3.59	97.92	96.41	568	1039	19	36	1020	1003	56	1.83
NMW2346	POWNA2346-12	JN891150	Herbarium	Dipsacales	Caprifoliaceae	Viburnum	Viburnum_lantana	2009	rbcL	rbcLa-F	rbcLr590	565	28	15	43	522	4	10	518	512	55	7.61	0.77	1.92	99.23	98.08	572	19	27	46	526	4	7	522	519	58	8.04	0.76	1.33	99.24	98.67	567	1048	8	17	1040	1031	56	0.76
NMW2345	POWNA2345-12	JN890844	Herbarium	Dipsacales	Caprifoliaceae	Viburnum	Viburnum_lantana	1981	rbcL	rbcLa-F	rbcLr590	569	32	5	37	532	4	7	528	525	60	6.5	0.75	1.32	99.25	98.68	567	10	26	36	531	4	9	527	522	59	6.35	0.75	1.69	99.25	98.31	581	1063	8	16	1055	1047	60	0.75
NMW2347	POWNA2829-12	JN893199	Herbarium	Dipsacales	Caprifoliaceae	Viburnum	Viburnum_opulus	1999	rbcL	rbcLa-F	rbcLr590	568	31	11	42	526	5	13	521	513	54	7.39	0.95	2.47	99.05	97.53	572	13	25	38	534	4	9	530	525	59	6.64	0.75	1.69	99.25	98.31	574	1060	9	22	1051	1038	56	0.85
NMW2348	POWNA3082-12	JN893691	Herbarium	Dipsacales	Caprifoliaceae	Viburnum	Viburnum_opulus	1978	rbcL	rbcLa-F	rbcLr590	565	28	4	32	533	4	7	529	526	60	5.66	0.75	1.31	99.25	98.69	565	9	28	37	528	4	7	524	521	60	6.55	0.76	1.33	99.24	98.67	579	1061	8	14	1053	1047	60	0.75
NBGW3039	POWNA808-10	JN892941	Fresh	Dipsacales	Caprifoliaceae	Viburnum	Viburnum_opulus	2008	rbcL	rbcLa-F	rbcLr590	555	21	15	36	519	7	11	512	508	58	6.49	1.35	2.12	98.65	97.88	564	14	18	32	532	4	16	528	516	58	5.67	0.75	3.01	99.25	96.99	569	1051	11	27	1040	1024	58	1.05
NMW2357	POWNA2207-12	JN892429	Herbarium	Dipsacales	Dipsacaceae	Dipsacus	Dipsacus_fullonum	1983	rbcL	rbcLa-F	rbcLr590	574	37	9	46	528	4	10	524	518	57	8.01	0.76	1.89	99.24	98.11	574	11	42	53	521	6	10	515	511	59	9.23	1.15	1.92	98.85	98.08	578	1049	10	20	1039	1029	58	0.95
NMW2350	POWNA2214-12	JN891955	Herbarium	Dipsacales	Dipsacaceae	Dipsacus	Dipsacus_fullonum	1989	rbcL	rbcLa-F	rbcLr590	566	29	10	39	527	4	9	523	518	55	6.89	0.76	1.71	99.24	98.29	571	16	24	40	531	4	8	527	523	59	7.01	0.75	1.51	99.25	98.49	574	1058	8	17	1050	1041	57	0.76
NMW5180	POWNB058-10	JN890898	Fresh	Dipsacales	Dipsacaceae	Dipsacus	Dipsacus_fullonum	2010	rbcL	rbcLa-F	rbcLr590	568	27	14	41	527	4	15	523	512	58	7.22	0.76	2.85	99.24	97.15	566	13	26	39	527	4	7	523	520	58	6.89	0.76	1.33	99.24	98.67	570	1054	8	22	1046	1032	58	0.76
NBGW7121	POWNB181-10	JN893731	Fresh	Dipsacales	Dipsacaceae	Dipsacus	Dipsacus_fullonum	2010	rbcL	rbcLa-F	rbcLr590	571	21	18	39	532	5	15	527	517	58	6.83	0.94	2.82	99.06	97.18	566	14	23	37	529	4	10	525	519	58	6.54	0.76	1.89	99.24	98.11	569	1061	9	25	1052	1036	58	0.85
NMW2349	POWNA2812-12	JN893294	Herbarium	Dipsacales	Dipsacaceae	Dipsacus	Dipsacus_fullonum	1987	rbcL	rbcLa-F	rbcLr590	568	30	11	41	527	5	13	522	514	54	7.22	0.95	2.47	99.05	97.53	570	13	24	37	533	4	11	529	522	59	6.49	0.75	2.06	99.25	97.94	575	1060	9	24	1051	1036	57	0.85
NMW268	POWNA226-10	JN892032	Herbarium	Dipsacales	Dipsacaceae	Dipsacus	Dipsacus_pilosus	1996	rbcL	rbcLa-F	rbcLr590	635	83	84	167	468	5	31	463	437	48	26.3	1.07	6.62	98.93	93.38	628	80	75	155	473	15	43	458	430	44	24.68	3.17	9.09	96.83	90.91	578	941	20	74	921	867	46	2.13
NMW2352	POWNA2212-12	JN892434	Herbarium	Dipsacales	Dipsacaceae	Dipsacus	Dipsacus_pilosus	1950	rbcL	rbcLa-F	rbcLr590	570	32	9	41	529	6	22	523	507	51	7.19	1.13	4.16	98.87	95.84	570	14	30	44	526	4	7	522	519	60	7.72	0.76	1.33	99.24	98.67	574	1055	10	29	1045	1026	55	0.95
NMW2351	POWNA2213-12	JN891951	Herbarium	Dipsacales	Dipsacaceae	Dipsacus	Dipsacus_pilosus	1978	rbcL	rbcLa-F	rbcLr590	573	30	6	36	537	4	9	533	528	60	6.28	0.74	1.68	99.26	98.32	565	12	25	37	528	4	6	524	522	60	6.55	0.76	1.14	99.24	98.86	579	1065	8	15	1057	1050	60	0.75
NMW466	POWNA397-10	JN891640	Herbarium	Dipsacales	Dipsacaceae	Knautia	Knautia_arvensis	1995	rbcL	rbcLa-F	rbcLr590	620	49	70	119	501	10	21	491	480	49	19.19	2	4.19	98	95.81	621	71	75	146	475	5	40	470	435	43	23.51	1.05	8.42	98.95	91.58	571	976	15	61	961	915	46	1.54
NMW2353	POWNA2211-12	JN892433	Herbarium	Dipsacales	Dipsacaceae	Knautia	Knautia_arvensis	1981	rbcL	rbcLa-F	rbcLr590	572	36	7	43	529	4	11	525	518	58	7.52	0.76	2.08	99.24	97.92	569	8	50	58	511	4	8	507	503	58	10.19	0.78	1.57	99.22	98.43	580	1040	8	19	1032	1021	58	0.77
NMW2354	POWNA2210-12	JN892432	Herbarium	Dipsacales	Dipsacaceae	Knautia	Knautia_arvensis	1993	rbcL	rbcLa-F	rbcLr590	568	28	10	38	530	4	10	526	520	56	6.69	0.75	1.89	99.25	98.11	573	12	31	43	530	4	11	526	519	59	7.5	0.75	2.08	99.25	97.92	578	1060	8	21	1052	1039	57	0.75
NMW1008	POWNA659-10	JN891310	Herbarium	Dipsacales	Dipsacaceae	Scabiosa	Scabiosa_columbaria	1993	rbcL	rbcLa-F	rbcLr590	635	19	94	113	522	4	12	518	510	57	17.8	0.77	2.3	99.23	97.7	620	73	20	93	527	7	21	520	506	56	15	1.33	3.98	98.67	96.02	568	1049	11	33	1038	1016	57	1.05
NMW2356	POWNA2208-12	JN891595	Herbarium	Dipsacales	Dipsacaceae	Scabiosa	Scabiosa_columbaria	1971	rbcL	rbcLa-F	rbcLr590	572	35	4	39	533	4	8	529	525	60	6.82	0.75	1.5	99.25	98.5	567	13	28	41	526	4	5	522	521	60	7.23	0.76	0.95	99.24	99.05	578	1059	8	13	1051	1046	60	0.76
NMW2355	POWNA2209-12	JN892431	Herbarium	Dipsacales	Dipsacaceae	Scabiosa	Scabiosa_columbaria	1983	rbcL	rbcLa-F	rbcLr590	568	30	11	41	527	8	26	519	501	50	7.22	1.52	4.93	98.48	95.07	568	12	28	40	528	4	6	524	522	60	7.04	0.76	1.14	99.24	98.86	572	1055	12	32	1043	1023	55	1.14
NMW2359	POWNA2205-12	JN892023	Herbarium	Dipsacales	Dipsacaceae	Succisa	Succisa_pratensis	1993	rbcL	rbcLa-F	rbcLr590	568	32	9	41	527	8	23	519	504	48	7.22	1.52	4.36	98.48	95.64	569	12	30	42	527	4	6	523	521	59	7.38	0.76	1.14	99.24	98.86	574	1054	12	29	1042	1025	54	1.14
NMW772	POWNA741-10	JN893486	Herbarium	Dipsacales	Dipsacaceae	Succisa	Succisa_pratensis	2006	rbcL	rbcLa-F	rbcLr590	564	22	18	40	524	11	22	513	502	57	7.09	2.1	4.2	97.9	95.8	565	18	21	39	526	8	22	518	504	55	6.9	1.52	4.18	98.48	95.82	566	1050	19	44	1031	1006	56	1.81
NMW2358	POWNA2206-12	JN892026	Herbarium	Dipsacales	Dipsacaceae	Succisa	Succisa_pratensis	1999	rbcL	rbcLa-F	rbcLa-R	570	28	18	46	524	4	11	520	513	56	8.07	0.76	2.1	99.24	97.9	573	13	18	31	542	4	11	538	531	59	5.41	0.74	2.03	99.26	97.97	570	1066	8	22	1058	1044	57	0.75
NMW960	POWNA790-10	JN890925	Herbarium	Dipsacales	Valerianaceae	Valeriana	Valeriana_dioica	1993	rbcL	rbcLa-F	rbcLr590	613	26	68	94	519	10	25	509	494	55	15.33	1.93	4.82	98.07	95.18	628	90	24	114	514	9	13	505	501	56	18.15	1.75	2.53	98.25	97.47	567	1033	19	38	1014	995	55	1.84
NMW2361	POWNA2657-12	JN892724	Herbarium	Dipsacales	Valerianaceae	Valeriana	Valeriana_dioica	1995	rbcL	rbcLa-F	rbcLr590	605	27	60	87	518	4	5	514	513	60	14.38	0.77	0.97	99.23	99.03	566	16	26	42	524	4	7	520	517	59	7.42	0.76	1.34	99.24	98.66	563	1042	8	12	1034	1030	59	0.77
NMW6341	POWNA1150-12	JN892701	Fresh	Dipsacales	Valerianaceae	Valeriana	Valeriana_dioica	2011	rbcL	rbcLa-F	rbcLr590	566	31	3	34	532	4	10	528	522	58	6.01	0.75	1.88	99.25	98.12	570	12	30	42	528	4	9	524	519	60	7.37	0.76	1.7	99.24	98.3	578	1060	8	19	1052	1041	59	0.75
NMW2360	POWNA2656-12	JN892723	Herbarium	Dipsacales	Valerianaceae	Valeriana	Valeriana_dioica	1999	rbcL	rbcLa-F	rbcLr590	570	32	4	36	534	4	7	530	527	60	6.32	0.75	1.31	99.25	98.69	567	5	26	31	536	4	6	532	530	60	5.47	0.75	1.12	99.25	98.88	587	1070	8	13	1062	1057	60	0.75
NMW2363	POWNA2407-12	JN892722	Herbarium	Dipsacales	Valerianaceae	Valeriana	Valeriana_officinalis	1978	rbcL	rbcLa-F	rbcLr590	568	30	14	44	524	5	13	519	511	53	7.75	0.95	2.48	99.05	97.52	575	14	39	53	522	4	6	518	516	60	9.22	0.77	1.15	99.23	98.85	568	1046	9	19	1037	1027	56	0.86
NMW959	POWNA791-10	JN893515	Herbarium	Dipsacales	Valerianaceae	Valeriana	Valeriana_officinalis	1992	rbcL	rbcLa-F	rbcLr590	763	42	214	256	507	14	27	493	480	51	33.55	2.76	5.33	97.24	94.67	562	21	23	44	518	4	8	514	510	58	7.83	0.77	1.54	99.23	98.46	563	1025	18	35	1007	990	54	1.76
NMW6231	POWNA2834-12	JN890693	Fresh	Dipsacales	Valerianaceae	Valeriana	Valeriana_officinalis	2011	rbcL	rbcLa-F	rbcLr590	570	39	5	44	526	4	7	522	519	55	7.72	0.76	1.33	99.24	98.67	566	12	26	38	528	4	7	524	521	60	6.71	0.76	1.33	99.24	98.67	577	1054	8	14	1046	1040	57	0.76
NMW2362	POWNA2654-12	JN893079	Herbarium	Dipsacales	Valerianaceae	Valeriana	Valeriana_officinalis	2003	rbcL	rbcLa-F	rbcLr590	568	31	5	36	532	4	7	528	525	60	6.34	0.75	1.32	99.25	98.68	567	5	28	33	534	4	4	530	530	59	5.82	0.75	0.75	99.25	99.25	586	1066	8	11	1058	1055	60	0.75
NMW2364	POWNA2652-12	JN892720	Herbarium	Dipsacales	Valerianaceae	Valerianella	Valerianella_carinata	2007	rbcL	rbcLa-F	rbcLr590	561	23	27	50	511	75	123	436	388	47	8.91	14.68	24.07	85.32	75.93	567	14	27	41	526	4	10	522	516	59	7.23	0.76	1.9	99.24	98.1	553	1037	79	133	958	904	53	7.62
NMW2366	POWNA2399-12	JN893075	Herbarium	Dipsacales	Valerianaceae	Valerianella	Valerianella_carinata	2005	rbcL	rbcLa-F	rbcLr590	617	15	81	96	521	5	8	516	513	58	15.56	0.96	1.54	99.04	98.46	567	13	27	40	527	4	9	523	518	58	7.05	0.76	1.71	99.24	98.29	554	1048	9	17	1039	1031	58	0.86
NMW2365	POWNA2653-12	JN892721	Herbarium	Dipsacales	Valerianaceae	Valerianella	Valerianella_carinata	1994	rbcL	rbcLa-F	rbcLr590	565	18	1	19	546	4	11	542	535	59	3.36	0.73	2.01	99.27	97.99	570	4	28	32	538	4	16	534	522	59	5.61	0.74	2.97	99.26	97.03	590	1084	8	27	1076	1057	59	0.74
NMW957	POWNA792-10	JN893516	Herbarium	Dipsacales	Valerianaceae	Valerianella	Valerianella_dentata	1977	rbcL	rbcLa-F	rbcLr590	641	47	82	129	512	13	28	499	484	51	20.12	2.54	5.47	97.46	94.53	651	89	46	135	516	14	34	502	482	49	20.74	2.71	6.59	97.29	93.41	586	1028	27	62	1001	966	50	2.63
NMW2368	POWNA2658-12	JN892733	Herbarium	Dipsacales	Valerianaceae	Valerianella	Valerianella_dentata	1992	rbcL	rbcLa-F	rbcLr590	573	38	4	42	531	4	8	527	523	60	7.33	0.75	1.51	99.25	98.49	574	0	41	41	533	4	7	529	526	59	7.14	0.75	1.31	99.25	98.69	590	1064	8	15	1056	1049	59	0.75
NMW2367	POWNA2651-12	JN892717	Herbarium	Dipsacales	Valerianaceae	Valerianella	Valerianella_dentata	1991	rbcL	rbcLa-F	rbcLr590	562	26	3	29	533	4	10	529	523	59	5.16	0.75	1.88	99.25	98.12	569	14	24	38	531	4	9	527	522	59	6.68	0.75	1.69	99.25	98.31	578	1064	8	19	1056	1045	59	0.75
NMW955	POWNA793-10	JN893518	Herbarium	Dipsacales	Valerianaceae	Valerianella	Valerianella_eriocarpa	1998	rbcL	rbcLa-F	rbcLr590	602	17	63	80	522	11	18	511	504	56	13.29	2.11	3.45	97.89	96.55	622	75	21	96	526	12	19	514	507	57	15.43	2.28	3.61	97.72	96.39	567	1048	23	37	1025	1011	56	2.19
NMW2370	POWNA2487-12	JN892850	Herbarium	Dipsacales	Valerianaceae	Valerianella	Valerianella_eriocarpa	1951	rbcL	rbcLa-F	rbcLr590	568	33	2	35	533	4	13	529	520	56	6.16	0.75	2.44	99.25	97.56	569	8	35	43	526	10	12	516	514	55	7.56	1.9	2.28	98.1	97.72	581	1059	14	25	1045	1034	56	1.32
NMW2369	POWNA2659-12	JN892738	Herbarium	Dipsacales	Valerianaceae	Valerianella	Valerianella_eriocarpa	1974	rbcL	rbcLa-F	rbcLr590	563	28	2	30	533	4	6	529	527	59	5.33	0.75	1.13	99.25	98.87	568	4	28	32	536	4	13	532	523	59	5.63	0.75	2.43	99.25	97.57	587	1069	8	19	1061	1050	59	0.75
NMW954	POWNA794-10	JN893517	Herbarium	Dipsacales	Valerianaceae	Valerianella	Valerianella_locusta	2005	rbcL	rbcLa-F	rbcLr590	612	41	68	109	503	13	22	490	481	49	17.81	2.58	4.37	97.42	95.63	638	95	19	114	524	14	28	510	496	52	17.87	2.67	5.34	97.33	94.66	562	1027	27	50	1000	977	51	2.63
NMW2372	POWNA2489-12	JN891409	Herbarium	Dipsacales	Valerianaceae	Valerianella	Valerianella_locusta	1994	rbcL	rbcLa-F	rbcLr590	568	32	6	38	530	4	5	526	525	60	6.69	0.75	0.94	99.25	99.06	569	11	34	45	524	5	11	519	513	60	7.91	0.95	2.1	99.05	97.9	577	1054	9	16	1045	1038	60	0.85
NMW2371	POWNA2486-12	JN891405	Herbarium	Dipsacales	Valerianaceae	Valerianella	Valerianella_locusta	1993	rbcL	rbcLa-F	rbcLr590	569	32	8	40	529	8	21	521	508	50	7.03	1.51	3.97	98.49	96.03	570	16	29	45	525	4	12	521	513	57	7.89	0.76	2.29	99.24	97.71	571	1054	12	33	1042	1021	54	1.14
NMW2375	POWNA2490-12	JN892853	Herbarium	Dipsacales	Valerianaceae	Valerianella	Valerianella_rimosa	1913	rbcL	rbcLa-F	rbcLr590	574	38	29	67	507	4	10	503	497	56	11.67	0.79	1.97	99.21	98.03	572	4	35	39	533	4	12	529	521	58	6.82	0.75	2.25	99.25	97.75	566	1040	8	22	1032	1018	57	0.77
NMW417	POWNA374-10	JN893220	Herbarium	Ericales	Balsaminaceae	Impatiens	Impatiens_nolitangere	1982	rbcL	rbcLa-F	rbcLr590	618	36	64	100	518	6	33	512	485	45	16.18	1.16	6.37	98.84	93.63	633	77	57	134	499	4	13	495	486	52	21.17	0.8	2.61	99.2	97.39	569	1017	10	46	1007	971	48	0.98
NMW4280	POWNA2599-12	JN892085	Herbarium	Ericales	Balsaminaceae	Impatiens	Impatiens_nolitangere	1957	rbcL	rbcLa-F	rbcLr590	567	38	0	38	529	56	135	473	394	45	6.7	10.59	25.52	89.41	74.48	571	1	73	74	497	69	133	428	364	46	12.96	13.88	26.76	86.12	73.24	593	1026	125	268	901	758	45	12.18
NMW4279	POWNA3077-12	JN893685	Herbarium	Ericales	Balsaminaceae	Impatiens	Impatiens_nolitangere	1948	rbcL	rbcLa-F	rbcLr590	568	33	4	37	531	4	5	527	526	60	6.51	0.75	0.94	99.25	99.06	574	14	39	53	521	4	5	517	516	59	9.23	0.77	0.96	99.23	99.04	577	1052	8	10	1044	1042	60	0.76
NMW3576	POWNA2817-12	JN893299	Herbarium	Ericales	Ericaceae	Andromeda	Andromeda_polifolia	1973	rbcL	rbcLa-F	rbcLr590	567	23	13	36	531	4	9	527	522	60	6.35	0.75	1.69	99.25	98.31	569	14	28	42	527	4	8	523	519	59	7.38	0.76	1.52	99.24	98.48	569	1058	8	17	1050	1041	59	0.76
NMW041	POWNA033-10	JN892203	Herbarium	Ericales	Ericaceae	Andromeda	Andromeda_polifolia	1979	rbcL	rbcLa-F	rbcLr590	550	28	4	32	518	6	53	512	465	43	5.82	1.16	10.23	98.84	89.77	561	13	26	39	522	4	18	518	504	51	6.95	0.77	3.45	99.23	96.55	568	1040	10	71	1030	969	47	0.96
NMW3578	POWNA2813-12	JN893295	Herbarium	Ericales	Ericaceae	Calluna	Calluna_vulgaris	1968	rbcL	rbcLa-F	rbcLr590	569	32	10	42	527	4	6	523	521	59	7.38	0.76	1.14	99.24	98.86	568	15	35	50	518	4	8	514	510	59	8.8	0.77	1.54	99.23	98.46	570	1045	8	14	1037	1031	59	0.77
NMW3579	POWNA974-12	JN893296	Herbarium	Ericales	Ericaceae	Calluna	Calluna_vulgaris	1981	rbcL	rbcLa-F	rbcLr590	578	46	4	50	528	4	8	524	520	60	8.65	0.76	1.52	99.24	98.48	576	4	43	47	529	4	8	525	521	59	8.16	0.76	1.51	99.24	98.49	587	1057	8	16	1049	1041	59	0.76
NMW118	POWNA094-10	JN890752	Herbarium	Ericales	Ericaceae	Calluna	Calluna_vulgaris	1994	rbcL	rbcLa-F	rbcLr590	562	25	14	39	523	17	79	506	444	40	6.94	3.25	15.11	96.75	84.89	558	15	30	45	513	12	59	501	454	44	8.06	2.34	11.5	97.66	88.5	566	1036	29	138	1007	898	42	2.8
NMW6238	POWNA2826-12	JN891388	Fresh	Ericales	Ericaceae	Calluna	Calluna_vulgaris	2011	rbcL	rbcLa-F	rbcLr590	568	28	11	39	529	4	7	525	522	58	6.87	0.76	1.32	99.24	98.68	571	8	38	46	525	4	11	521	514	57	8.06	0.76	2.1	99.24	97.9	576	1054	8	18	1046	1036	58	0.76
NMW289	POWNA239-10	JN891889	Herbarium	Ericales	Ericaceae	Empetrum	Empetrum_nigrum	1991	rbcL	rbcLa-F	rbcLr590	636	28	88	116	520	6	43	514	477	44	18.24	1.15	8.27	98.85	91.73	632	84	50	134	498	6	20	492	478	46	21.2	1.2	4.02	98.8	95.98	566	1018	12	63	1006	955	45	1.18
NMW3574	POWNA2815-12	JN893297	Herbarium	Ericales	Ericaceae	Empetrum	Empetrum_nigrum	1986	rbcL	rbcLa-F	rbcLr590	569	32	5	37	532	4	8	528	524	60	6.5	0.75	1.5	99.25	98.5	569	13	35	48	521	4	4	517	517	60	8.44	0.77	0.77	99.23	99.23	576	1053	8	12	1045	1041	60	0.76
NMW3575	POWNA2816-12	JN893298	Herbarium	Ericales	Ericaceae	Empetrum	Empetrum_nigrum	1995	rbcL	rbcLa-F	rbcLr590	570	32	11	43	527	4	6	523	521	60	7.54	0.76	1.14	99.24	98.86	575	15	30	45	530	4	9	526	521	59	7.83	0.75	1.7	99.25	98.3	575	1057	8	15	1049	1042	60	0.76
NMW298	POWNA245-10	JN890834	Herbarium	Ericales	Ericaceae	Erica	Erica_cinerea	1969	rbcL	rbcLa-F	rbcLr590	634	55	83	138	496	6	28	490	468	44	21.77	1.21	5.65	98.79	94.35	637	85	70	155	482	4	18	478	464	47	24.33	0.83	3.73	99.17	96.27	570	978	10	46	968	932	46	1.02
NMW3581	POWNA2607-12	JN893003	Herbarium	Ericales	Ericaceae	Erica	Erica_cinerea	1961	rbcL	rbcLa-F	rbcLr590	571	39	0	39	532	12	23	520	509	57	6.83	2.26	4.32	97.74	95.68	572	10	39	49	523	9	16	514	507	58	8.57	1.72	3.06	98.28	96.94	583	1055	21	39	1034	1016	57	1.99
NMW3580	POWNA2608-12	JN893004	Herbarium	Ericales	Ericaceae	Erica	Erica_cinerea	1994	rbcL	rbcLa-F	rbcLr590	575	33	13	46	529	4	6	525	523	60	8	0.76	1.13	99.24	98.87	570	14	31	45	525	4	10	521	515	60	7.89	0.76	1.9	99.24	98.1	572	1054	8	16	1046	1038	60	0.76
NMW299	POWNA246-10	JN892342	Herbarium	Ericales	Ericaceae	Erica	Erica_tetralix	1970	rbcL	rbcLa-F	rbcLr590	717	29	167	196	521	9	43	512	478	42	27.34	1.73	8.25	98.27	91.75	762	216	86	302	460	6	26	454	434	44	39.63	1.3	5.65	98.7	94.35	571	981	15	69	966	912	43	1.53
NMW3583	POWNA3004-12	JN893573	Herbarium	Ericales	Ericaceae	Erica	Erica_tetralix	1988	rbcL	rbcLa-F	rbcLr590	574	31	16	47	527	4	5	523	522	59	8.19	0.76	0.95	99.24	99.05	569	13	29	42	527	4	9	523	518	59	7.38	0.76	1.71	99.24	98.29	573	1054	8	14	1046	1040	59	0.76
NMW6256	POWNA2458-12	JN892822	Fresh	Ericales	Ericaceae	Erica	Erica_tetralix	2011	rbcL	rbcLa-F	rbcLr590	564	25	12	37	527	4	8	523	519	58	6.56	0.76	1.52	99.24	98.48	565	10	24	34	531	4	9	527	522	59	6.02	0.75	1.69	99.25	98.31	572	1058	8	17	1050	1041	59	0.76
NMW594	POWNA505-10	JN891124	Herbarium	Ericales	Ericaceae	Orthilia	Orthilia_secunda	1955	rbcL	rbcLa-F	rbcLr590	639	27	90	117	522	9	42	513	480	44	18.31	1.72	8.05	98.28	91.95	653	105	55	160	493	5	27	488	466	45	24.5	1.01	5.48	98.99	94.52	566	1015	14	69	1001	946	45	1.38
NMW3595	POWNA2451-12	JN891123	Herbarium	Ericales	Ericaceae	Orthilia	Orthilia_secunda	1987	rbcL	rbcLa-F	rbcLr590	569	30	9	39	530	5	11	525	519	59	6.85	0.94	2.08	99.06	97.92	571	14	31	45	526	4	10	522	516	59	7.88	0.76	1.9	99.24	98.1	575	1056	9	21	1047	1035	59	0.85
NMW685	POWNA572-10	JN890802	Herbarium	Ericales	Ericaceae	Pyrola	Pyrola_minor	1939	rbcL	rbcLa-F	rbcLr590	563	32	13	45	518	7	38	511	480	45	7.99	1.35	7.34	98.65	92.66	562	16	32	48	514	4	21	510	493	48	8.54	0.78	4.09	99.22	95.91	567	1032	11	59	1021	973	47	1.07
NMW3596	POWNA2450-12	JN891118	Herbarium	Ericales	Ericaceae	Pyrola	Pyrola_minor	1985	rbcL	rbcLa-F	rbcLr590	567	28	3	31	536	4	9	532	527	60	5.47	0.75	1.68	99.25	98.32	568	11	32	43	525	4	7	521	518	60	7.57	0.76	1.33	99.24	98.67	581	1061	8	16	1053	1045	60	0.75
NMW3597	POWNA2821-12	JN892804	Herbarium	Ericales	Ericaceae	Pyrola	Pyrola_minor	1975	rbcL	rbcLa-F	rbcLr590	569	27	12	39	530	4	7	526	523	59	6.85	0.75	1.32	99.25	98.68	567	13	26	39	528	4	7	524	521	60	6.88	0.76	1.33	99.24	98.67	573	1058	8	14	1050	1044	59	0.76
NMW595	POWNA573-10	JN893276	Herbarium	Ericales	Ericaceae	Pyrola	Pyrola_rotundifolia	1986	rbcL	rbcLa-F	rbcLr590	631	17	94	111	520	4	26	516	494	46	17.59	0.77	5	99.23	95	647	102	25	127	520	5	27	515	493	46	19.63	0.96	5.19	99.04	94.81	564	1040	9	53	1031	987	46	0.87
NMW3598	POWNA2452-12	JN892808	Herbarium	Ericales	Ericaceae	Pyrola	Pyrola_rotundifolia	1955	rbcL	rbcLa-F	rbcLr590	565	28	8	36	529	4	7	525	522	60	6.37	0.76	1.32	99.24	98.68	567	13	28	41	526	4	8	522	518	59	7.23	0.76	1.52	99.24	98.48	572	1055	8	15	1047	1040	60	0.76
NMW3599	POWNA2453-12	JN892809	Herbarium	Ericales	Ericaceae	Pyrola	Pyrola_rotundifolia	1974	rbcL	rbcLa-F	rbcLr590	568	30	5	35	533	4	8	529	525	60	6.16	0.75	1.5	99.25	98.5	569	9	28	37	532	4	10	528	522	59	6.5	0.75	1.88	99.25	98.12	580	1065	8	18	1057	1047	59	0.75
NMW939	POWNA787-10	JN891673	Herbarium	Ericales	Ericaceae	Vaccinium	Vaccinium_myrtillus	2001	rbcL	rbcLa-F	rbcLr590	754	27	210	237	517	7	41	510	476	44	31.43	1.35	7.93	98.65	92.07	741	191	54	245	496	6	37	490	459	46	33.06	1.21	7.46	98.79	92.54	568	1013	13	78	1000	935	45	1.28
NMW6261	POWNA2023-12	JN892169	Fresh	Ericales	Ericaceae	Vaccinium	Vaccinium_myrtillus	2011	rbcL	rbcLa-F	rbcLr590	563	25	7	32	531	4	10	527	521	58	5.68	0.75	1.88	99.25	98.12	566	14	28	42	524	4	7	520	517	60	7.42	0.76	1.34	99.24	98.66	574	1055	8	17	1047	1038	59	0.76
NMW6239	POWNA2827-12	JN891394	Fresh	Ericales	Ericaceae	Vaccinium	Vaccinium_myrtillus	2011	rbcL	rbcLa-F	rbcLr590	567	30	8	38	529	4	6	525	523	58	6.7	0.76	1.13	99.24	98.87	568	13	29	42	526	4	7	522	519	59	7.39	0.76	1.33	99.24	98.67	573	1055	8	13	1047	1042	59	0.76
NMW938	POWNA788-10	JN891672	Herbarium	Ericales	Ericaceae	Vaccinium	Vaccinium_oxycoccos	1972	rbcL	rbcLa-F	rbcLr590	636	47	80	127	509	14	67	495	442	40	19.97	2.75	13.16	97.25	86.84	676	125	115	240	436	7	44	429	392	42	35.5	1.61	10.09	98.39	89.91	578	945	21	111	924	834	41	2.22
NMW3584	POWNA2960-12	JN893514	Herbarium	Ericales	Ericaceae	Vaccinium	Vaccinium_oxycoccos	1971	rbcL	rbcLa-F	rbcLr590	569	41	12	53	516	4	4	512	512	58	9.31	0.78	0.78	99.22	99.22	573	5	45	50	523	4	10	519	513	59	8.73	0.76	1.91	99.24	98.09	577	1039	8	14	1031	1025	58	0.77
NMW3585	POWNA2292-12	JN892583	Herbarium	Ericales	Ericaceae	Vaccinium	Vaccinium_oxycoccos	1953	rbcL	rbcLa-F	rbcLr590	566	29	10	39	527	4	9	523	518	59	6.89	0.76	1.71	99.24	98.29	570	11	29	40	530	4	15	526	515	59	7.02	0.75	2.83	99.25	97.17	573	1057	8	24	1049	1033	59	0.76
NMW3586	POWNA2293-12	JN893002	Herbarium	Ericales	Ericaceae	Vaccinium	Vaccinium_oxycoccos	1970	rbcL	rbcLa-F	rbcLr590	570	30	9	39	531	4	8	527	523	60	6.84	0.75	1.51	99.25	98.49	565	11	25	36	529	4	10	525	519	60	6.37	0.76	1.89	99.24	98.11	574	1060	8	18	1052	1042	60	0.75
NMW937	POWNA789-10	JN891677	Herbarium	Ericales	Ericaceae	Vaccinium	Vaccinium_vitis-idaea	1997	rbcL	rbcLa-F	rbcLr590	616	26	71	97	519	5	48	514	471	44	15.75	0.96	9.25	99.04	90.75	638	95	22	117	521	4	17	517	504	51	18.34	0.77	3.26	99.23	96.74	567	1040	9	65	1031	975	48	0.87
NMW3589	POWNA2295-12	JN892593	Herbarium	Ericales	Ericaceae	Vaccinium	Vaccinium_vitis-idaea	1958	rbcL	rbcLa-F	rbcLr590	579	47	6	53	526	4	7	522	519	56	9.15	0.76	1.33	99.24	98.67	572	6	42	48	524	4	8	520	516	58	8.39	0.76	1.53	99.24	98.47	588	1050	8	15	1042	1035	57	0.76
NMW3590	POWNA1299-12	JN892801	Herbarium	Ericales	Ericaceae	Vaccinium	Vaccinium_vitis-idaea	1984	rbcL	rbcLa-F	rbcLr590	571	41	4	45	526	9	22	517	504	58	7.88	1.71	4.18	98.29	95.82	566	0	38	38	528	6	18	522	510	58	6.71	1.14	3.41	98.86	96.59	592	1054	15	40	1039	1014	58	1.42
NBGW6065	POWNB219-10	JN890701	Fresh	Ericales	Primulaceae	Anagallis	Anagallis_arvensis	2010	rbcL	rbcLa-F	rbcLr590	892	26	343	369	523	5	14	518	509	56	41.37	0.96	2.68	99.04	97.32	842	89	29	118	724	48	109	676	615	49	14.01	6.63	15.06	93.37	84.94	771	1247	53	123	1194	1124	52	4.25
NMW3627	POWNA2620-12	JN893015	Herbarium	Ericales	Primulaceae	Anagallis	Anagallis_arvensis	1975	rbcL	rbcLa-F	rbcLr590	572	30	14	44	528	4	6	524	522	60	7.69	0.76	1.14	99.24	98.86	570	16	27	43	527	4	8	523	519	59	7.54	0.76	1.52	99.24	98.48	572	1055	8	14	1047	1041	60	0.76
NMW3625	POWNA2619-12	JN893014	Herbarium	Ericales	Primulaceae	Anagallis	Anagallis_arvensis	1978	rbcL	rbcLa-F	rbcLr590	567	28	10	38	529	4	7	525	522	60	6.7	0.76	1.32	99.24	98.68	566	13	29	42	524	4	6	520	518	60	7.42	0.76	1.15	99.24	98.85	573	1053	8	13	1045	1040	60	0.76
NMW5241	POWNB134-10	JN893430	Fresh	Ericales	Primulaceae	Anagallis	Anagallis_arvensis	2010	rbcL	rbcLa-F	rbcLr590	679	39	114	153	526	4	9	522	517	59	22.53	0.76	1.71	99.24	98.29	565	12	28	40	525	4	10	521	515	59	7.08	0.76	1.9	99.24	98.1	579	1051	8	19	1043	1032	59	0.76
NMW3628	POWNA1173-12	JN890928	Herbarium	Ericales	Primulaceae	Anagallis	Anagallis_minima	1974	rbcL	rbcLa-F	rbcLr590	573	72	59	131	442	56	130	386	312	41	22.86	12.67	29.41	87.33	70.59	566	91	144	235	331	127	193	204	138	27	41.52	38.37	58.31	61.63	41.69	448	773	183	323	590	450	35	23.67
NMW038	POWNA031-10	JN891009	Herbarium	Ericales	Primulaceae	Anagallis	Anagallis_minima	2006	rbcL	rbcLa-F	rbcLr590	640	26	94	120	520	9	49	511	471	42	18.75	1.73	9.42	98.27	90.58	653	107	51	158	495	10	50	485	445	42	24.2	2.02	10.1	97.98	89.9	565	1015	19	99	996	916	42	1.87
NMW3629	POWNA1174-12	JN890929	Herbarium	Ericales	Primulaceae	Anagallis	Anagallis_minima	1998	rbcL	rbcLa-F	rbcLr590	578	49	4	53	525	4	11	521	514	57	9.17	0.76	2.1	99.24	97.9	575	7	45	52	523	4	6	519	517	59	9.04	0.76	1.15	99.24	98.85	588	1048	8	17	1040	1031	58	0.76
NMW039	POWNA032-10	JN891008	Herbarium	Ericales	Primulaceae	Anagallis	Anagallis_tenella	2002	rbcL	rbcLa-F	rbcLr590	636	25	89	114	522	6	39	516	483	44	17.92	1.15	7.47	98.85	92.53	635	90	22	112	523	4	16	519	507	49	17.64	0.76	3.06	99.24	96.94	566	1045	10	55	1035	990	47	0.96
NMW3631	POWNA1031-12	JN890712	Herbarium	Ericales	Primulaceae	Anagallis	Anagallis_tenella	1988	rbcL	rbcLa-F	rbcLr590	570	38	32	70	500	10	34	490	466	47	12.28	2	6.8	98	93.2	577	16	57	73	504	30	95	474	409	43	12.65	5.95	18.85	94.05	81.15	546	1004	40	129	964	875	45	3.98
NMW3630	POWNA1032-12	JN890713	Herbarium	Ericales	Primulaceae	Anagallis	Anagallis_tenella	2003	rbcL	rbcLa-F	rbcLr590	568	42	10	52	516	4	5	512	511	60	9.15	0.78	0.97	99.22	99.03	575	9	55	64	511	6	13	505	498	55	11.13	1.17	2.54	98.83	97.46	577	1027	10	18	1017	1009	57	0.97
NMW398	POWNA340-10	JN893452	Herbarium	Ericales	Primulaceae	Glaux	Glaux_maritima	1990	rbcL	rbcLa-F	rbcLr590	638	27	92	119	519	6	41	513	478	44	18.65	1.16	7.9	98.84	92.1	653	107	54	161	492	5	38	487	454	43	24.66	1.02	7.72	98.98	92.28	564	1011	11	79	1000	932	44	1.09
NMW5286	POWNB142-10	JN891077	Fresh	Ericales	Primulaceae	Hottonia	Hottonia_palustris	2010	rbcL	rbcLa-F	rbcLr590	569	31	15	46	523	4	9	519	514	58	8.08	0.76	1.72	99.24	98.28	568	13	23	36	532	4	13	528	519	58	6.34	0.75	2.44	99.25	97.56	574	1055	8	22	1047	1033	58	0.76
NMW521	POWNA448-10	JN893195	Herbarium	Ericales	Primulaceae	Lysimachia	Lysimachia_nemorum	2003	rbcL	rbcLa-F	rbcLr590	659	24	110	134	525	4	34	521	491	47	20.33	0.76	6.48	99.24	93.52	631	87	25	112	519	6	28	513	491	48	17.75	1.16	5.39	98.84	94.61	567	1044	10	62	1034	982	48	0.96
NMW3637	POWNA1657-12	JN891671	Herbarium	Ericales	Primulaceae	Lysimachia	Lysimachia_nemorum	1999	rbcL	rbcLa-F	rbcLr590	569	30	2	32	537	4	8	533	529	59	5.62	0.74	1.49	99.26	98.51	574	6	42	48	526	4	8	522	518	58	8.36	0.76	1.52	99.24	98.48	587	1063	8	16	1055	1047	59	0.75
NMW3638	POWNA1656-12	JN891670	Herbarium	Ericales	Primulaceae	Lysimachia	Lysimachia_nemorum	2003	rbcL	rbcLa-F	rbcLr590	567	25	15	40	527	4	7	523	520	59	7.05	0.76	1.33	99.24	98.67	569	12	30	42	527	4	11	523	516	59	7.38	0.76	2.09	99.24	97.91	570	1054	8	18	1046	1036	59	0.76
NMW3640	POWNA1759-12	JN892386	Herbarium	Ericales	Primulaceae	Lysimachia	Lysimachia_nummularia	2003	rbcL	rbcLa-F	rbcLr590	564	31	4	35	529	4	7	525	522	58	6.21	0.76	1.32	99.24	98.68	570	12	28	40	530	4	11	526	519	59	7.02	0.75	2.08	99.25	97.92	577	1059	8	18	1051	1041	58	0.76
NMW6477	POWNA2422-12	JN892753	Fresh	Ericales	Primulaceae	Lysimachia	Lysimachia_nummularia	2011	rbcL	rbcLa-F	rbcLr590	561	23	11	34	527	4	14	523	513	56	6.06	0.76	2.66	99.24	97.34	565	12	23	35	530	4	12	526	518	59	6.19	0.75	2.26	99.25	97.74	572	1057	8	26	1049	1031	57	0.76
NBGW4035	POWNA449-10	JN893418	Fresh	Ericales	Primulaceae	Lysimachia	Lysimachia_nummularia	2008	rbcL	rbcLa-F	rbcLr590	637	22	98	120	517	11	16	506	501	54	18.84	2.13	3.09	97.87	96.91	539	0	18	18	521	6	16	515	505	52	3.34	1.15	3.07	98.85	96.93	568	1038	17	32	1021	1006	53	1.64
NMW522	POWNA450-10	JN893194	Herbarium	Ericales	Primulaceae	Lysimachia	Lysimachia_vulgaris	2005	rbcL	rbcLa-F	rbcLr590	635	24	91	115	520	6	40	514	480	45	18.11	1.15	7.69	98.85	92.31	628	82	20	102	526	7	34	519	492	46	16.24	1.33	6.46	98.67	93.54	565	1046	13	74	1033	972	45	1.24
NMW3642	POWNA1757-12	JN892384	Herbarium	Ericales	Primulaceae	Lysimachia	Lysimachia_vulgaris	1999	rbcL	rbcLa-F	rbcLr590	578	43	10	53	525	4	21	521	504	50	9.17	0.76	4	99.24	96	570	8	37	45	525	4	8	521	517	57	7.89	0.76	1.52	99.24	98.48	582	1050	8	29	1042	1021	53	0.76
NMW3645	POWNA2175-12	JN891816	Herbarium	Ericales	Primulaceae	Primula	Primula_veris	1961	rbcL	rbcLa-F	rbcLr590	564	28	16	44	520	4	8	516	512	57	7.8	0.77	1.54	99.23	98.46	569	18	33	51	518	4	6	514	512	60	8.96	0.77	1.16	99.23	98.84	562	1038	8	14	1030	1024	58	0.77
NMW3643	POWNA2170-12	JN891798	Herbarium	Ericales	Primulaceae	Primula	Primula_veris	1993	rbcL	rbcLa-F	rbcLr590	567	30	5	35	532	4	9	528	523	59	6.17	0.75	1.69	99.25	98.31	568	14	34	48	520	4	7	516	513	60	8.45	0.77	1.35	99.23	98.65	576	1052	8	16	1044	1036	59	0.76
NMW3644	POWNA2174-12	JN891815	Herbarium	Ericales	Primulaceae	Primula	Primula_veris	1982	rbcL	rbcLa-F	rbcLr590	571	35	5	40	531	4	12	527	519	60	7.01	0.75	2.26	99.25	97.74	570	12	35	47	523	4	8	519	515	60	8.25	0.76	1.53	99.24	98.47	579	1054	8	20	1046	1034	60	0.76
NMW5021	POWNB097-10	JN893423	Fresh	Ericales	Primulaceae	Primula	Primula_veris	2010	rbcL	rbcLa-F	rbcLr590	568	30	6	36	532	4	15	528	517	55	6.34	0.75	2.82	99.25	97.18	568	17	24	41	527	4	9	523	518	59	7.22	0.76	1.71	99.24	98.29	577	1059	8	24	1051	1035	57	0.76
NMW674	POWNA565-10	JN891863	Herbarium	Ericales	Primulaceae	Primula	Primula_vulgaris	1982	rbcL	rbcLa-F	rbcLr590	638	54	86	140	498	7	25	491	473	46	21.94	1.41	5.02	98.59	94.98	640	93	90	183	457	8	22	449	435	47	28.59	1.75	4.81	98.25	95.19	568	955	15	47	940	908	47	1.57
NMW3646	POWNA2173-12	JN891810	Herbarium	Ericales	Primulaceae	Primula	Primula_vulgaris	1968	rbcL	rbcLa-F	rbcLr590	577	38	11	49	528	4	8	524	520	59	8.49	0.76	1.52	99.24	98.48	575	12	41	53	522	4	7	518	515	60	9.22	0.77	1.34	99.23	98.66	573	1050	8	15	1042	1035	59	0.76
NBGW7205	POWNA1324-12	JN891144	Fresh	Ericales	Primulaceae	Primula	Primula_vulgaris	2011	rbcL	rbcLa-F	rbcLr590	566	31	3	34	532	4	7	528	525	59	6.01	0.75	1.32	99.25	98.68	566	13	30	43	523	4	7	519	516	60	7.6	0.76	1.34	99.24	98.66	577	1055	8	14	1047	1041	59	0.76
NMW6257	POWNA2459-12	JN892823	Fresh	Ericales	Primulaceae	Primula	Primula_vulgaris	2011	rbcL	rbcLa-F	rbcLr590	569	31	1	32	537	7	17	530	520	51	5.62	1.3	3.17	98.7	96.83	566	12	29	41	525	4	12	521	513	59	7.24	0.76	2.29	99.24	97.71	578	1062	11	29	1051	1033	55	1.04
NMW6262	POWNA2022-12	JN892168	Fresh	Ericales	Primulaceae	Primula	Primula_vulgaris	2011	rbcL	rbcLa-F	rbcLr590	565	26	13	39	526	4	8	522	518	59	6.9	0.76	1.52	99.24	98.48	566	14	26	40	526	4	9	522	517	60	7.07	0.76	1.71	99.24	98.29	568	1052	8	17	1044	1035	59	0.76
NMW764	POWNA652-10	JN893722	Herbarium	Ericales	Primulaceae	Samolus	Samolus_valerandi	1993	rbcL	rbcLa-F	rbcLr590	635	25	90	115	520	5	26	515	494	46	18.11	0.96	5	99.04	95	653	106	26	132	521	4	18	517	503	49	20.21	0.77	3.45	99.23	96.55	566	1041	9	44	1032	997	47	0.86
NMW3648	POWNA2166-12	JN892381	Herbarium	Ericales	Primulaceae	Samolus	Samolus_valerandi	1969	rbcL	rbcLa-F	rbcLr590	568	22	9	31	537	4	10	533	527	60	5.46	0.74	1.86	99.26	98.14	571	10	36	46	525	4	7	521	518	60	8.06	0.76	1.33	99.24	98.67	575	1062	8	17	1054	1045	60	0.75
NMW6421	POWNA2953-12	JN893494	Fresh	Ericales	Primulaceae	Samolus	Samolus_valerandi	2011	rbcL	rbcLa-F	rbcLr590	561	18	14	32	529	4	8	525	521	55	5.7	0.76	1.51	99.24	98.49	567	11	24	35	532	4	14	528	518	59	6.17	0.75	2.63	99.25	97.37	569	1061	8	22	1053	1039	57	0.75
NMW048	POWNA043-10	JN892206	Herbarium	Fabales	Fabaceae	Anthyllis	Anthyllis_vulneraria	1999	rbcL	rbcLa-F	rbcLr590	643	22	101	123	520	5	27	515	493	47	19.13	0.96	5.19	99.04	94.81	645	97	26	123	522	4	16	518	506	52	19.07	0.77	3.07	99.23	96.93	567	1042	9	43	1033	999	49	0.86
NMW6405	POWNA2602-12	JN892998	Fresh	Fabales	Fabaceae	Anthyllis	Anthyllis_vulneraria	2011	rbcL	rbcLa-F	rbcLr590	574	48	7	55	519	4	7	515	512	56	9.58	0.77	1.35	99.23	98.65	574	8	32	40	534	4	10	530	524	59	6.97	0.75	1.87	99.25	98.13	585	1053	8	17	1045	1036	58	0.76
NMW4167	POWNA1793-12	JN891852	Herbarium	Fabales	Fabaceae	Anthyllis	Anthyllis_vulneraria	1999	rbcL	rbcLa-F	rbcLr590	567	28	15	43	524	4	5	520	519	59	7.58	0.76	0.95	99.24	99.05	567	12	27	39	528	4	4	524	524	60	6.88	0.76	0.76	99.24	99.24	569	1052	8	9	1044	1043	60	0.76
NMW4168	POWNA1790-12	JN891849	Herbarium	Fabales	Fabaceae	Anthyllis	Anthyllis_vulneraria	1999	rbcL	rbcLa-F	rbcLr590	567	27	5	32	535	4	9	531	526	60	5.64	0.75	1.68	99.25	98.32	568	13	21	34	534	4	11	530	523	59	5.99	0.75	2.06	99.25	97.94	577	1069	8	20	1061	1049	59	0.75
NMW071	POWNA062-10	JN891979	Herbarium	Fabales	Fabaceae	Astragalus	Astragalus_glycyphyllos	1972	rbcL	rbcLa-F	rbcLr590	904	27	353	380	524	5	20	519	504	50	42.04	0.95	3.82	99.05	96.18	845	300	36	336	509	4	9	505	500	59	39.76	0.79	1.77	99.21	98.23	563	1033	9	29	1024	1004	54	0.87
NMW4170	POWNA1638-12	JN891624	Herbarium	Fabales	Fabaceae	Astragalus	Astragalus_glycyphyllos	1936	rbcL	rbcLa-F	rbcLr590	566	28	11	39	527	18	41	509	486	55	6.89	3.42	7.78	96.58	92.22	573	16	31	47	526	10	20	516	506	57	8.2	1.9	3.8	98.1	96.2	572	1053	28	61	1025	992	56	2.66
NMW4169	POWNA1791-12	JN891850	Herbarium	Fabales	Fabaceae	Astragalus	Astragalus_glycyphyllos	1944	rbcL	rbcLa-F	rbcLr590	572	32	2	34	538	4	13	534	525	59	5.94	0.74	2.42	99.26	97.58	568	14	27	41	527	4	10	523	517	60	7.22	0.76	1.9	99.24	98.1	581	1065	8	23	1057	1042	59	0.75
NMW4171	POWNA1637-12	JN891623	Herbarium	Fabales	Fabaceae	Cytisus	Cytisus_scoparius	1988	rbcL	rbcLa-F	rbcLr590	569	29	9	38	531	4	8	527	523	60	6.68	0.75	1.51	99.25	98.49	568	15	25	40	528	4	9	524	519	60	7.04	0.76	1.7	99.24	98.3	574	1059	8	17	1051	1042	60	0.76
NMW252	POWNA208-10	JN891814	Herbarium	Fabales	Fabaceae	Cytisus	Cytisus_scoparius	2002	rbcL	rbcLa-F	rbcLr590	560	25	15	40	520	5	47	515	473	44	7.14	0.96	9.04	99.04	90.96	560	16	23	39	521	4	20	517	501	52	6.96	0.77	3.84	99.23	96.16	565	1041	9	67	1032	974	48	0.86
NMW4172	POWNA1640-12	JN891626	Herbarium	Fabales	Fabaceae	Cytisus	Cytisus_scoparius	2004	rbcL	rbcLa-F	rbcLr590	567	29	13	42	525	4	5	521	520	60	7.41	0.76	0.95	99.24	99.05	567	15	20	35	532	4	7	528	525	59	6.17	0.75	1.32	99.25	98.68	569	1057	8	12	1049	1045	60	0.76
NMW380	POWNA319-10	JN893665	Herbarium	Fabales	Fabaceae	Genista	Genista_anglica	1982	rbcL	rbcLa-F	rbcLr590	616	26	68	94	522	7	49	515	473	44	15.26	1.34	9.39	98.66	90.61	611	66	28	94	517	7	63	510	454	45	15.38	1.35	12.19	98.65	87.81	564	1039	14	112	1025	927	44	1.35
NMW4174	POWNA1642-12	JN891628	Herbarium	Fabales	Fabaceae	Genista	Genista_anglica	1972	rbcL	rbcLa-F	rbcLr590	572	31	10	41	531	4	6	527	525	59	7.17	0.75	1.13	99.25	98.87	570	13	34	47	523	4	9	519	514	60	8.25	0.76	1.72	99.24	98.28	577	1054	8	15	1046	1039	60	0.76
NMW4173	POWNA1639-12	JN891625	Herbarium	Fabales	Fabaceae	Genista	Genista_anglica	1966	rbcL	rbcLa-F	rbcLr590	565	24	14	38	527	4	6	523	521	60	6.73	0.76	1.14	99.24	98.86	566	14	21	35	531	4	8	527	523	59	6.18	0.75	1.51	99.25	98.49	567	1058	8	14	1050	1044	60	0.76
NMW381	POWNA320-10	JN893664	Herbarium	Fabales	Fabaceae	Genista	Genista_pilosa	1961	rbcL	rbcLa-F	rbcLr590	639	26	92	118	521	7	48	514	473	43	18.47	1.34	9.21	98.66	90.79	680	133	35	168	512	8	50	504	462	43	24.71	1.56	9.77	98.44	90.23	565	1033	15	98	1018	935	43	1.45
NMW4176	POWNA1644-12	JN891630	Herbarium	Fabales	Fabaceae	Genista	Genista_pilosa	1969	rbcL	rbcLa-F	rbcLr590	570	30	12	42	528	4	7	524	521	60	7.37	0.76	1.33	99.24	98.67	568	13	29	42	526	4	5	522	521	60	7.39	0.76	0.95	99.24	99.05	572	1054	8	12	1046	1042	60	0.76
NMW4175	POWNA1641-12	JN891627	Herbarium	Fabales	Fabaceae	Genista	Genista_pilosa	1965	rbcL	rbcLa-F	rbcLr590	568	29	14	43	525	4	5	521	520	60	7.57	0.76	0.95	99.24	99.05	568	15	19	34	534	4	9	530	525	59	5.99	0.75	1.69	99.25	98.31	568	1059	8	14	1051	1045	60	0.76
NMW382	POWNA321-10	JN893663	Herbarium	Fabales	Fabaceae	Genista	Genista_tinctoria	1983	rbcL	rbcLa-F	rbcLr590	638	29	90	119	519	6	47	513	472	44	18.65	1.16	9.06	98.84	90.94	681	131	49	180	501	4	30	497	471	47	26.43	0.8	5.99	99.2	94.01	570	1020	10	77	1010	943	45	0.98
NMW4177	POWNA1643-12	JN891629	Herbarium	Fabales	Fabaceae	Genista	Genista_tinctoria	1992	rbcL	rbcLa-F	rbcLr590	571	30	22	52	519	6	22	513	497	51	9.11	1.16	4.24	98.84	95.76	569	12	31	43	526	4	6	522	520	60	7.56	0.76	1.14	99.24	98.86	564	1045	10	28	1035	1017	55	0.96
NMW4178	POWNA1646-12	JN891632	Herbarium	Fabales	Fabaceae	Genista	Genista_tinctoria	1952	rbcL	rbcLa-F	rbcLr590	565	24	15	39	526	4	6	522	520	60	6.9	0.76	1.14	99.24	98.86	567	14	25	39	528	4	8	524	520	60	6.88	0.76	1.52	99.24	98.48	568	1054	8	14	1046	1040	60	0.76
NMW416	POWNA354-10	JN893221	Herbarium	Fabales	Fabaceae	Hippocrepis	Hippocrepis_comosa	1972	rbcL	rbcLa-F	rbcLr590	625	30	75	105	520	6	45	514	475	44	16.8	1.15	8.65	98.85	91.35	644	95	27	122	522	5	13	517	509	51	18.94	0.96	2.49	99.04	97.51	568	1042	11	58	1031	984	47	1.06
NMW4180	POWNA1131-12	JN890863	Herbarium	Fabales	Fabaceae	Hippocrepis	Hippocrepis_comosa	1938	rbcL	rbcLa-F	rbcLr590	568	28	13	41	527	6	10	521	517	59	7.22	1.14	1.9	98.86	98.1	573	16	35	51	522	5	7	517	515	60	8.9	0.96	1.34	99.04	98.66	570	1049	11	17	1038	1032	60	1.05
NMW4179	POWNA1645-12	JN891631	Herbarium	Fabales	Fabaceae	Hippocrepis	Hippocrepis_comosa	1967	rbcL	rbcLa-F	rbcLr590	570	37	8	45	525	4	5	521	520	60	7.89	0.76	0.95	99.24	99.05	571	1	36	37	534	4	10	530	524	59	6.48	0.75	1.87	99.25	98.13	584	1059	8	15	1051	1044	59	0.76
NMW474	POWNA905-10	JN891867	Herbarium	Fabales	Fabaceae	Lathyrus	Lathyrus_japonicus	1999	rbcL	rbcLa-F	rbcLr590	645	31	98	129	516	108	171	408	345	41	20	20.93	33.14	79.07	66.86	618	70	26	96	522	4	8	518	514	60	15.53	0.77	1.53	99.23	98.47	563	1038	112	179	926	859	51	10.79
NMW4181	POWNA1132-12	JN890864	Herbarium	Fabales	Fabaceae	Lathyrus	Lathyrus_japonicus	1898	rbcL	rbcLa-F	rbcLr590	571	35	9	44	527	4	5	523	522	60	7.71	0.76	0.95	99.24	99.05	571	4	35	39	532	4	7	528	525	59	6.83	0.75	1.32	99.25	98.68	583	1059	8	12	1051	1047	59	0.76
NMW4182	POWNA1133-12	JN890865	Herbarium	Fabales	Fabaceae	Lathyrus	Lathyrus_japonicus	1965	rbcL	rbcLa-F	rbcLr590	570	31	8	39	531	4	8	527	523	59	6.84	0.75	1.51	99.25	98.49	571	5	34	39	532	4	6	528	526	60	6.83	0.75	1.13	99.25	98.87	587	1063	8	14	1055	1049	60	0.75
NMW4183	POWNA1134-12	JN890866	Herbarium	Fabales	Fabaceae	Lathyrus	Lathyrus_japonicus	1960	rbcL	rbcLa-F	rbcLr590	567	29	8	37	530	7	11	523	519	59	6.53	1.32	2.08	98.68	97.92	570	4	32	36	534	5	13	529	521	59	6.32	0.94	2.43	99.06	97.57	584	1064	12	24	1052	1040	59	1.13
NMW475	POWNA407-10	JN891866	Herbarium	Fabales	Fabaceae	Lathyrus	Lathyrus_linifolius	2004	rbcL	rbcLa-F	rbcLr590	641	26	93	119	522	5	25	517	497	45	18.56	0.96	4.79	99.04	95.21	643	92	27	119	524	7	19	517	505	53	18.51	1.34	3.63	98.66	96.37	569	1046	12	44	1034	1002	49	1.15
NMW4185	POWNA3079-12	JN893687	Herbarium	Fabales	Fabaceae	Lathyrus	Lathyrus_linifolius	1994	rbcL	rbcLa-F	rbcLr590	569	30	14	44	525	4	5	521	520	60	7.73	0.76	0.95	99.24	99.05	569	15	29	44	525	4	8	521	517	60	7.73	0.76	1.52	99.24	98.48	570	1050	8	13	1042	1037	60	0.76
NMW4184	POWNA2260-12	JN892522	Herbarium	Fabales	Fabaceae	Lathyrus	Lathyrus_linifolius	1996	rbcL	rbcLa-F	rbcLr590	566	27	12	39	527	4	5	523	522	60	6.89	0.76	0.95	99.24	99.05	567	11	30	41	526	4	7	522	519	60	7.23	0.76	1.33	99.24	98.67	574	1053	8	12	1045	1041	60	0.76
NMW4186	POWNA1135-12	JN890869	Herbarium	Fabales	Fabaceae	Lathyrus	Lathyrus_nissolia	2007	rbcL	rbcLa-F	rbcLr590	570	50	11	61	509	4	9	505	500	58	10.7	0.79	1.77	99.21	98.23	573	16	56	72	501	5	10	496	491	55	12.57	1	2	99	98	574	1010	9	19	1001	991	56	0.89
NMW4187	POWNA2261-12	JN892530	Herbarium	Fabales	Fabaceae	Lathyrus	Lathyrus_nissolia	1993	rbcL	rbcLa-F	rbcLr590	565	52	4	56	509	4	5	505	504	60	9.91	0.79	0.98	99.21	99.02	566	10	54	64	502	4	5	498	497	60	11.31	0.8	1	99.2	99	582	1011	8	10	1003	1001	60	0.79
NMW4190	POWNA982-12	JN890637	Herbarium	Fabales	Fabaceae	Lathyrus	Lathyrus_palustris	1971	rbcL	rbcLa-F	rbcLr590	568	28	12	40	528	4	11	524	517	58	7.04	0.76	2.08	99.24	97.92	570	11	36	47	523	4	4	519	519	59	8.25	0.76	0.76	99.24	99.24	574	1051	8	15	1043	1036	58	0.76
NMW477	POWNA409-10	JN891868	Herbarium	Fabales	Fabaceae	Lathyrus	Lathyrus_palustris	1987	rbcL	rbcLa-F	rbcLr590	565	27	17	44	521	5	46	516	475	43	7.79	0.96	8.83	99.04	91.17	560	13	30	43	517	7	26	510	491	48	7.68	1.35	5.03	98.65	94.97	569	1038	12	72	1026	966	46	1.16
NMW4191	POWNA981-12	JN890636	Herbarium	Fabales	Fabaceae	Lathyrus	Lathyrus_palustris	1982	rbcL	rbcLa-F	rbcLr590	564	24	11	35	529	4	5	525	524	59	6.21	0.76	0.95	99.24	99.05	571	13	29	42	529	4	6	525	523	60	7.36	0.76	1.13	99.24	98.87	575	1058	8	11	1050	1047	60	0.76
NMW4188	POWNA1136-12	JN890871	Herbarium	Fabales	Fabaceae	Lathyrus	Lathyrus_pratensis	1992	rbcL	rbcLa-F	rbcLr590	568	31	11	42	526	4	6	522	520	60	7.39	0.76	1.14	99.24	98.86	566	13	27	40	526	4	6	522	520	60	7.07	0.76	1.14	99.24	98.86	570	1052	8	12	1044	1040	60	0.76
NMW4189	POWNA1137-12	JN890872	Herbarium	Fabales	Fabaceae	Lathyrus	Lathyrus_pratensis	1987	rbcL	rbcLa-F	rbcLr590	569	30	11	41	528	4	5	524	523	59	7.21	0.76	0.95	99.24	99.05	566	12	28	40	526	4	7	522	519	60	7.07	0.76	1.33	99.24	98.67	573	1054	8	12	1046	1042	59	0.76
NBGW5013	POWNA410-10	JN891335	Herbarium	Fabales	Fabaceae	Lathyrus	Lathyrus_pratensis	2008	rbcL	rbcLa-F	rbcLr590	569	48	18	66	503	14	24	489	479	56	11.6	2.78	4.77	97.22	95.23	562	14	21	35	527	11	20	516	507	57	6.23	2.09	3.8	97.91	96.2	571	1030	25	44	1005	986	57	2.43
NMW478	POWNA411-10	JN891874	Herbarium	Fabales	Fabaceae	Lathyrus	Lathyrus_sylvestris	1990	rbcL	rbcLa-F	rbcLr590	640	58	86	144	496	19	78	477	418	39	22.5	3.83	15.73	96.17	84.27	655	101	92	193	462	14	78	448	384	40	29.47	3.03	16.88	96.97	83.12	571	958	33	156	925	802	40	3.44
NMW4192	POWNA980-12	JN890635	Herbarium	Fabales	Fabaceae	Lathyrus	Lathyrus_sylvestris	1989	rbcL	rbcLa-F	rbcLr590	569	37	14	51	518	4	9	514	509	59	8.96	0.77	1.74	99.23	98.26	574	12	54	66	508	4	10	504	498	59	11.5	0.79	1.97	99.21	98.03	572	1026	8	19	1018	1007	59	0.78
NMW4194	POWNA986-12	JN890641	Herbarium	Fabales	Fabaceae	Lathyrus	Lathyrus_sylvestris	1978	rbcL	rbcLa-F	rbcLr590	568	31	10	41	527	4	6	523	521	60	7.22	0.76	1.14	99.24	98.86	571	10	30	40	531	4	8	527	523	59	7.01	0.75	1.51	99.25	98.49	575	1058	8	14	1050	1044	60	0.76
NMW4196	POWNA984-12	JN890639	Herbarium	Fabales	Fabaceae	Lotus	Lotus_corniculatus	1992	rbcL	rbcLa-F	rbcLr590	569	30	11	41	528	4	5	524	523	60	7.21	0.76	0.95	99.24	99.05	573	9	39	48	525	4	7	521	518	59	8.38	0.76	1.33	99.24	98.67	576	1053	8	12	1045	1041	59	0.76
NMW6199	POWNA1989-12	JN892127	Fresh	Fabales	Fabaceae	Lotus	Lotus_corniculatus	2011	rbcL	rbcLa-F	rbcLr590	565	28	8	36	529	4	6	525	523	58	6.37	0.76	1.13	99.24	98.87	568	14	31	45	523	4	5	519	518	60	7.92	0.76	0.96	99.24	99.04	573	1052	8	11	1044	1041	59	0.76
NBGW5014	POWNA436-10	JN891333	Herbarium	Fabales	Fabaceae	Lotus	Lotus_corniculatus	2008	rbcL	rbcLa-F	rbcLr590	555	18	14	32	523	4	13	519	510	56	5.77	0.76	2.49	99.24	97.51	565	17	23	40	525	9	14	516	511	57	7.08	1.71	2.67	98.29	97.33	567	1048	13	27	1035	1021	57	1.24
NMW4195	POWNA985-12	JN890627	Herbarium	Fabales	Fabaceae	Lotus	Lotus_corniculatus	1967	rbcL	rbcLa-F	rbcLr590	567	28	3	31	536	4	10	532	526	59	5.47	0.75	1.87	99.25	98.13	568	12	28	40	528	4	7	524	521	60	7.04	0.76	1.33	99.24	98.67	581	1064	8	17	1056	1047	60	0.75
NBGW7223	POWNA1011-12	JN890686	Fresh	Fabales	Fabaceae	Lotus	Lotus_corniculatus	2011	rbcL	rbcLa-F	rbcLr590	563	25	13	38	525	4	6	521	519	58	6.75	0.76	1.14	99.24	98.86	564	14	24	38	526	4	7	522	519	60	6.74	0.76	1.33	99.24	98.67	569	1051	8	13	1043	1038	59	0.76
NMW513	POWNA437-10	JN892506	Herbarium	Fabales	Fabaceae	Lotus	Lotus_glaber	1987	rbcL	rbcLa-F	rbcLr590	637	26	87	113	524	6	36	518	488	45	17.74	1.15	6.87	98.85	93.13	643	95	27	122	521	6	25	515	496	47	18.97	1.15	4.8	98.85	95.2	569	1045	12	61	1033	984	46	1.15
NMW4198	POWNA989-12	JN890643	Herbarium	Fabales	Fabaceae	Lotus	Lotus_glaber	1992	rbcL	rbcLa-F	rbcLr590	571	31	14	45	526	4	5	522	521	60	7.88	0.76	0.95	99.24	99.05	566	12	28	40	526	4	6	522	520	60	7.07	0.76	1.14	99.24	98.86	570	1052	8	11	1044	1041	60	0.76
NMW4197	POWNA983-12	JN890638	Herbarium	Fabales	Fabaceae	Lotus	Lotus_glaber	1997	rbcL	rbcLa-F	rbcLr590	567	29	13	42	525	4	4	521	521	60	7.41	0.76	0.76	99.24	99.24	572	8	31	39	533	4	10	529	523	59	6.82	0.75	1.88	99.25	98.12	574	1058	8	14	1050	1044	59	0.76
NMW876	POWNA438-10	JN892354	Herbarium	Fabales	Fabaceae	Lotus	Lotus_pedunculatus	1988	rbcL	rbcLa-F	rbcLr590	625	25	79	104	521	8	48	513	473	43	16.64	1.54	9.21	98.46	90.79	638	99	22	121	517	7	44	510	473	46	18.97	1.35	8.51	98.65	91.49	562	1038	15	92	1023	946	44	1.45
NMW6364	POWNA1493-12	JN891386	Fresh	Fabales	Fabaceae	Lotus	Lotus_pedunculatus	2011	rbcL	rbcLa-F	rbcLr590	568	26	1	27	541	4	13	537	528	57	4.75	0.74	2.4	99.26	97.6	570	9	34	43	527	4	7	523	520	59	7.54	0.76	1.33	99.24	98.67	585	1068	8	20	1060	1048	58	0.75
NMW4199	POWNA988-12	JN890642	Herbarium	Fabales	Fabaceae	Lotus	Lotus_pedunculatus	1988	rbcL	rbcLa-F	rbcLr590	677	25	119	144	533	4	9	529	524	56	21.27	0.75	1.69	99.25	98.31	566	13	24	37	529	4	8	525	521	60	6.54	0.76	1.51	99.24	98.49	578	1062	8	17	1054	1045	58	0.75
NMW4200	POWNA966-12	JN890605	Herbarium	Fabales	Fabaceae	Lotus	Lotus_pedunculatus	2003	rbcL	rbcLa-F	rbcLr590	568	27	5	32	536	4	10	532	526	60	5.63	0.75	1.87	99.25	98.13	570	10	27	37	533	4	10	529	523	59	6.49	0.75	1.88	99.25	98.12	583	1069	8	20	1061	1049	60	0.75
NMW514	POWNA439-10	JN892504	Herbarium	Fabales	Fabaceae	Lotus	Lotus_subbiflorus	1953	rbcL	rbcLa-F	rbcLr590	638	37	89	126	512	8	50	504	462	43	19.75	1.56	9.77	98.44	90.23	641	91	92	183	458	5	37	453	421	43	28.55	1.09	8.08	98.91	91.92	568	970	13	87	957	883	43	1.34
NMW4201	POWNA965-12	JN890604	Herbarium	Fabales	Fabaceae	Lotus	Lotus_subbiflorus	2002	rbcL	rbcLa-F	rbcLr590	569	19	5	24	545	4	13	541	532	59	4.22	0.73	2.39	99.27	97.61	573	14	28	42	531	4	10	527	521	59	7.33	0.75	1.88	99.25	98.12	582	1076	8	23	1068	1053	59	0.74
NMW4202	POWNA964-12	JN890603	Herbarium	Fabales	Fabaceae	Lotus	Lotus_subbiflorus	1977	rbcL	rbcLa-F	rbcLr590	567	27	14	41	526	4	5	522	521	59	7.23	0.76	0.95	99.24	99.05	566	13	26	39	527	4	5	523	522	60	6.89	0.76	0.95	99.24	99.05	569	1053	8	10	1045	1043	60	0.76
NMW532	POWNA460-10	JN892937	Herbarium	Fabales	Fabaceae	Medicago	Medicago_arabica	1997	rbcL	rbcLa-F	rbcLr590	636	29	85	114	522	7	40	515	482	44	17.92	1.34	7.66	98.66	92.34	688	137	33	170	518	5	25	513	493	47	24.71	0.97	4.83	99.03	95.17	571	1040	12	65	1028	975	46	1.15
NMW4204	POWNA969-12	JN890608	Herbarium	Fabales	Fabaceae	Medicago	Medicago_arabica	1998	rbcL	rbcLa-F	rbcLr590	569	18	12	30	539	4	9	535	530	59	5.27	0.74	1.67	99.26	98.33	570	12	29	41	529	4	11	525	518	59	7.19	0.76	2.08	99.24	97.92	575	1068	8	20	1060	1048	59	0.75
NMW4203	POWNA963-12	JN890602	Herbarium	Fabales	Fabaceae	Medicago	Medicago_arabica	1999	rbcL	rbcLa-F	rbcLr590	566	25	15	40	526	4	6	522	520	59	7.07	0.76	1.14	99.24	98.86	568	2	27	29	539	4	11	535	528	59	5.11	0.74	2.04	99.26	97.96	582	1065	8	17	1057	1048	59	0.75
NMW533	POWNA461-10	JN892938	Herbarium	Fabales	Fabaceae	Medicago	Medicago_lupulina	1986	rbcL	rbcLa-F	rbcLr590	634	25	85	110	524	5	27	519	497	46	17.35	0.95	5.15	99.05	94.85	677	130	30	160	517	5	22	512	495	49	23.63	0.97	4.26	99.03	95.74	570	1041	10	49	1031	992	47	0.96
NMW4206	POWNA967-12	JN890606	Herbarium	Fabales	Fabaceae	Medicago	Medicago_lupulina	2000	rbcL	rbcLa-F	rbcLr590	565	25	14	39	526	4	6	522	520	59	6.9	0.76	1.14	99.24	98.86	568	12	31	43	525	4	6	521	519	60	7.57	0.76	1.14	99.24	98.86	570	1051	8	12	1043	1039	59	0.76
NMW4205	POWNA968-12	JN890607	Herbarium	Fabales	Fabaceae	Medicago	Medicago_lupulina	1987	rbcL	rbcLa-F	rbcLr590	567	22	9	31	536	4	13	532	523	59	5.47	0.75	2.43	99.25	97.57	566	11	30	41	525	4	7	521	518	60	7.24	0.76	1.33	99.24	98.67	576	1061	8	20	1053	1041	59	0.75
NMW4209	POWNA970-12	JN890609	Herbarium	Fabales	Fabaceae	Medicago	Medicago_polymorpha	1924	rbcL	rbcLa-F	rbcLr590	570	70	8	78	492	4	4	488	488	58	13.68	0.81	0.81	99.19	99.19	572	6	72	78	494	4	5	490	489	59	13.64	0.81	1.01	99.19	98.99	581	986	8	9	978	977	59	0.81
NMW4208	POWNA1138-12	JN890875	Herbarium	Fabales	Fabaceae	Medicago	Medicago_polymorpha	1924	rbcL	rbcLa-F	rbcLr590	564	25	12	37	527	4	7	523	520	59	6.56	0.76	1.33	99.24	98.67	568	15	27	42	526	4	7	522	519	60	7.39	0.76	1.33	99.24	98.67	567	1053	8	14	1045	1039	60	0.76
NMW4210	POWNA1109-12	JN890823	Herbarium	Fabales	Fabaceae	Melilotus	Melilotus_altissimus	1992	rbcL	rbcLa-F	rbcLr590	570	30	11	41	529	4	5	525	524	59	7.19	0.76	0.95	99.24	99.05	568	12	31	43	525	4	5	521	520	60	7.57	0.76	0.95	99.24	99.05	575	1054	8	10	1046	1044	60	0.76
NMW4211	POWNA1110-12	JN890824	Herbarium	Fabales	Fabaceae	Melilotus	Melilotus_altissimus	1968	rbcL	rbcLa-F	rbcLr590	565	26	11	37	528	4	6	524	522	59	6.55	0.76	1.14	99.24	98.86	568	14	27	41	527	4	7	523	520	60	7.22	0.76	1.33	99.24	98.67	572	1055	8	13	1047	1042	60	0.76
NMW539	POWNA465-10	JN892934	Herbarium	Fabales	Fabaceae	Melilotus	Melilotus_altissimus	1992	rbcL	rbcLa-F	rbcLr590	565	25	20	45	520	5	33	515	487	44	7.96	0.96	6.35	99.04	93.65	558	12	19	31	527	7	25	520	502	50	5.56	1.33	4.74	98.67	95.26	567	1047	12	58	1035	989	47	1.15
NMW580	POWNA500-10	JN890868	Herbarium	Fabales	Fabaceae	Ononis	Ononis_reclinata	1961	rbcL	rbcLa-F	rbcLr590	659	30	108	138	521	7	44	514	477	43	20.94	1.34	8.45	98.66	91.55	720	171	66	237	483	6	28	477	455	45	32.92	1.24	5.8	98.76	94.2	568	1004	13	72	991	932	44	1.29
NMW4213	POWNA1111-12	JN890825	Herbarium	Fabales	Fabaceae	Ononis	Ononis_reclinata	1956	rbcL	rbcLa-F	rbcLr590	570	84	0	84	486	4	15	482	471	53	14.74	0.82	3.09	99.18	96.91	574	1	56	57	517	10	27	507	490	54	9.93	1.93	5.22	98.07	94.78	597	1003	14	42	989	961	53	1.4
NMW581	POWNA501-10	JN890867	Herbarium	Fabales	Fabaceae	Ononis	Ononis_repens	1988	rbcL	rbcLa-F	rbcLr590	639	37	89	126	513	7	51	506	462	42	19.72	1.36	9.94	98.64	90.06	671	122	51	173	498	9	48	489	450	43	25.78	1.81	9.64	98.19	90.36	569	1011	16	99	995	912	43	1.58
NMW6403	POWNA2596-12	JN892992	Fresh	Fabales	Fabaceae	Ononis	Ononis_repens	2011	rbcL	rbcLa-F	rbcLr590	570	34	7	41	529	4	5	525	524	58	7.19	0.76	0.95	99.24	99.05	566	14	28	42	524	4	6	520	518	60	7.42	0.76	1.15	99.24	98.85	574	1053	8	11	1045	1042	59	0.76
NMW4214	POWNA1112-12	JN890826	Herbarium	Fabales	Fabaceae	Ononis	Ononis_repens	1970	rbcL	rbcLa-F	rbcLr590	569	31	10	41	528	4	6	524	522	59	7.21	0.76	1.14	99.24	98.86	565	10	29	39	526	4	8	522	518	59	6.9	0.76	1.52	99.24	98.48	575	1054	8	14	1046	1040	59	0.76
NMW4215	POWNA1113-12	JN890827	Herbarium	Fabales	Fabaceae	Ononis	Ononis_repens	1999	rbcL	rbcLa-F	rbcLr590	566	18	5	23	543	4	11	539	532	59	4.06	0.74	2.03	99.26	97.97	569	10	27	37	532	4	8	528	524	60	6.5	0.75	1.5	99.25	98.5	579	1075	8	19	1067	1056	59	0.74
NMW582	POWNA502-10	JN890870	Herbarium	Fabales	Fabaceae	Ononis	Ononis_spinosa	2004	rbcL	rbcLa-F	rbcLr590	646	29	101	130	516	4	31	512	485	45	20.12	0.78	6.01	99.22	93.99	639	92	31	123	516	4	24	512	492	50	19.25	0.78	4.65	99.22	95.35	567	1032	8	55	1024	977	48	0.78
NMW4217	POWNA1115-12	JN890829	Herbarium	Fabales	Fabaceae	Ononis	Ononis_spinosa	1967	rbcL	rbcLa-F	rbcLr590	569	29	9	38	531	4	9	527	522	59	6.68	0.75	1.69	99.25	98.31	571	14	33	47	524	4	7	520	517	60	8.23	0.76	1.34	99.24	98.66	573	1055	8	16	1047	1039	60	0.76
NMW4216	POWNA1114-12	JN890828	Herbarium	Fabales	Fabaceae	Ononis	Ononis_spinosa	1999	rbcL	rbcLa-F	rbcLr590	569	32	14	46	523	4	6	519	517	59	8.08	0.76	1.15	99.24	98.85	568	1	28	29	539	4	12	535	527	59	5.11	0.74	2.23	99.26	97.77	581	1062	8	18	1054	1044	59	0.75
NMW588	POWNA504-10	JN890874	Herbarium	Fabales	Fabaceae	Ornithopus	Ornithopus_perpusillus	1978	rbcL	rbcLa-F	rbcLr590	561	26	19	45	516	7	41	509	475	44	8.02	1.36	7.95	98.64	92.05	561	18	30	48	513	4	21	509	492	52	8.56	0.78	4.09	99.22	95.91	564	1029	11	62	1018	967	48	1.07
NMW4219	POWNA1117-12	JN890831	Herbarium	Fabales	Fabaceae	Ornithopus	Ornithopus_perpusillus	1939	rbcL	rbcLa-F	rbcLr590	566	28	10	38	528	4	6	524	522	60	6.71	0.76	1.14	99.24	98.86	571	14	29	43	528	4	8	524	520	60	7.53	0.76	1.52	99.24	98.48	572	1056	8	14	1048	1042	60	0.76
NMW4218	POWNA1116-12	JN890830	Herbarium	Fabales	Fabaceae	Ornithopus	Ornithopus_perpusillus	1974	rbcL	rbcLa-F	rbcLr590	566	28	12	40	526	4	4	522	522	60	7.07	0.76	0.76	99.24	99.24	571	2	27	29	542	4	10	538	532	59	5.08	0.74	1.85	99.26	98.15	584	1068	8	14	1060	1054	59	0.75
NMW976	POWNA760-10	JN890683	Herbarium	Fabales	Fabaceae	Trifolium	Trifolium_arvense	2004	rbcL	rbcLa-F	rbcLr590	638	25	93	118	520	4	44	516	476	45	18.5	0.77	8.46	99.23	91.54	648	99	26	125	523	5	16	518	507	48	19.29	0.96	3.06	99.04	96.94	567	1043	9	60	1034	983	47	0.86
NMW4221	POWNA1267-12	JN891069	Herbarium	Fabales	Fabaceae	Trifolium	Trifolium_arvense	1968	rbcL	rbcLa-F	rbcLr590	569	20	10	30	539	4	9	535	530	59	5.27	0.74	1.67	99.26	98.33	568	11	30	41	527	4	7	523	520	60	7.22	0.76	1.33	99.24	98.67	574	1066	8	16	1058	1050	59	0.75
NMW4220	POWNA1268-12	JN891070	Herbarium	Fabales	Fabaceae	Trifolium	Trifolium_arvense	1994	rbcL	rbcLa-F	rbcLr590	573	33	6	39	534	4	12	530	522	57	6.81	0.75	2.25	99.25	97.75	567	11	26	37	530	4	9	526	521	59	6.53	0.75	1.7	99.25	98.3	579	1064	8	21	1056	1043	58	0.75
NMW4222	POWNA1270-12	JN891072	Herbarium	Fabales	Fabaceae	Trifolium	Trifolium_campestre	1994	rbcL	rbcLa-F	rbcLr590	567	27	15	42	525	4	6	521	519	60	7.41	0.76	1.14	99.24	98.86	570	13	32	45	525	4	6	521	519	60	7.89	0.76	1.14	99.24	98.86	569	1050	8	12	1042	1038	60	0.76
NMW4223	POWNA1269-12	JN891071	Herbarium	Fabales	Fabaceae	Trifolium	Trifolium_campestre	1985	rbcL	rbcLa-F	rbcLr590	564	27	13	40	524	4	7	520	517	59	7.09	0.76	1.34	99.24	98.66	567	13	28	41	526	4	8	522	518	59	7.23	0.76	1.52	99.24	98.48	570	1050	8	15	1042	1035	59	0.76
NMW4224	POWNA1264-12	JN891066	Herbarium	Fabales	Fabaceae	Trifolium	Trifolium_campestre	1992	rbcL	rbcLa-F	rbcLr590	572	33	10	43	529	4	8	525	521	59	7.52	0.76	1.51	99.24	98.49	566	12	25	37	529	4	8	525	521	59	6.54	0.76	1.51	99.24	98.49	574	1058	8	16	1050	1042	59	0.76
NBGW5011	POWNA761-10	JN891337	Herbarium	Fabales	Fabaceae	Trifolium	Trifolium_dubium	2008	rbcL	rbcLa-F	rbcLr590	563	40	17	57	506	10	16	496	490	55	10.12	1.98	3.16	98.02	96.84	564	15	33	48	516	6	15	510	501	53	8.51	1.16	2.91	98.84	97.09	568	1022	16	31	1006	991	54	1.57
NMW4225	POWNA1263-12	JN891065	Herbarium	Fabales	Fabaceae	Trifolium	Trifolium_dubium	1968	rbcL	rbcLa-F	rbcLr590	567	29	7	36	531	5	15	526	516	58	6.35	0.94	2.82	99.06	97.18	571	12	33	45	526	4	11	522	515	59	7.88	0.76	2.09	99.24	97.91	577	1057	9	26	1048	1031	58	0.85
NBGW7267	POWNA1649-12	JN891652	Fresh	Fabales	Fabaceae	Trifolium	Trifolium_dubium	2011	rbcL	rbcLa-F	rbcLr590	567	31	8	39	528	4	5	524	523	59	6.88	0.76	0.95	99.24	99.05	564	15	25	40	524	4	10	520	514	59	7.09	0.76	1.91	99.24	98.09	569	1052	8	15	1044	1037	59	0.76
NMW6472	POWNA2424-12	JN892755	Fresh	Fabales	Fabaceae	Trifolium	Trifolium_dubium	2011	rbcL	rbcLa-F	rbcLr590	563	28	2	30	533	4	10	529	523	57	5.33	0.75	1.88	99.25	98.12	566	11	29	40	526	4	7	522	519	60	7.07	0.76	1.33	99.24	98.67	579	1059	8	17	1051	1042	58	0.76
NMW4226	POWNA1266-12	JN891068	Herbarium	Fabales	Fabaceae	Trifolium	Trifolium_dubium	1962	rbcL	rbcLa-F	rbcLr590	570	31	10	41	529	4	6	525	523	59	7.19	0.76	1.13	99.24	98.87	568	11	28	39	529	4	7	525	522	59	6.87	0.76	1.32	99.24	98.68	575	1058	8	13	1050	1045	59	0.76
NMW963	POWNA762-10	JN890922	Herbarium	Fabales	Fabaceae	Trifolium	Trifolium_fragiferum	1995	rbcL	rbcLa-F	rbcLr590	639	27	91	118	521	8	48	513	473	43	18.47	1.54	9.21	98.46	90.79	733	187	53	240	493	12	51	481	442	40	32.74	2.43	10.34	97.57	89.66	568	1014	20	99	994	915	42	1.97
NMW4228	POWNA1262-12	JN891064	Herbarium	Fabales	Fabaceae	Trifolium	Trifolium_fragiferum	1974	rbcL	rbcLa-F	rbcLr590	567	29	14	43	524	4	4	520	520	60	7.58	0.76	0.76	99.24	99.24	571	16	30	46	525	4	6	521	519	60	8.06	0.76	1.14	99.24	98.86	567	1049	8	10	1041	1039	60	0.76
NMW4227	POWNA1265-12	JN891067	Herbarium	Fabales	Fabaceae	Trifolium	Trifolium_fragiferum	1966	rbcL	rbcLa-F	rbcLr590	568	31	11	42	526	4	7	522	519	59	7.39	0.76	1.33	99.24	98.67	571	0	34	34	537	4	8	533	529	59	5.95	0.74	1.49	99.26	98.51	585	1063	8	15	1055	1048	59	0.75
NMW4230	POWNA1451-12	JN891325	Herbarium	Fabales	Fabaceae	Trifolium	Trifolium_medium	1986	rbcL	rbcLa-F	rbcLr590	568	30	11	41	527	4	8	523	519	59	7.22	0.76	1.52	99.24	98.48	568	30	98	128	440	54	133	386	307	35	22.54	12.27	30.23	87.73	69.77	555	967	58	141	909	826	48	6
NMW4229	POWNA1261-12	JN891063	Herbarium	Fabales	Fabaceae	Trifolium	Trifolium_medium	1993	rbcL	rbcLa-F	rbcLr590	565	26	13	39	526	4	6	522	520	60	6.9	0.76	1.14	99.24	98.86	569	14	29	43	526	4	8	522	518	60	7.56	0.76	1.52	99.24	98.48	569	1052	8	14	1044	1038	60	0.76
NBGW5031	POWNA763-10	JN890836	Herbarium	Fabales	Fabaceae	Trifolium	Trifolium_medium	2008	rbcL	rbcLa-F	rbcLr590	556	72	7	79	477	9	18	468	459	55	14.21	1.89	3.77	98.11	96.23	562	13	22	35	527	5	13	522	514	54	6.23	0.95	2.47	99.05	97.53	570	1004	14	31	990	973	54	1.39
NMW964	POWNA764-10	JN890921	Herbarium	Fabales	Fabaceae	Trifolium	Trifolium_micranthum	2000	rbcL	rbcLa-F	rbcLr590	692	31	145	176	516	7	43	509	473	44	25.43	1.36	8.33	98.64	91.67	670	121	51	172	498	6	32	492	466	44	25.67	1.2	6.43	98.8	93.57	567	1014	13	75	1001	939	44	1.28
NMW4232	POWNA1449-12	JN891323	Herbarium	Fabales	Fabaceae	Trifolium	Trifolium_micranthum	1961	rbcL	rbcLa-F	rbcLr590	577	40	7	47	530	4	13	526	517	56	8.15	0.75	2.45	99.25	97.55	572	14	70	84	488	4	6	484	482	58	14.69	0.82	1.23	99.18	98.77	578	1018	8	19	1010	999	57	0.79
NMW4231	POWNA1452-12	JN891326	Herbarium	Fabales	Fabaceae	Trifolium	Trifolium_micranthum	1966	rbcL	rbcLa-F	rbcLr590	640	36	39	75	565	17	37	548	528	57	11.72	3.01	6.55	96.99	93.45	570	8	52	60	510	4	16	506	494	56	10.53	0.78	3.14	99.22	96.86	620	1075	21	53	1054	1022	57	1.95
NMW961	POWNA765-10	JN890924	Herbarium	Fabales	Fabaceae	Trifolium	Trifolium_occidentale	1997	rbcL	rbcLa-F	rbcLr590	644	27	96	123	521	6	46	515	475	44	19.1	1.15	8.83	98.85	91.17	638	89	26	115	523	6	27	517	496	47	18.03	1.15	5.16	98.85	94.84	568	1044	12	73	1032	971	46	1.15
NMW4233	POWNA1450-12	JN891324	Herbarium	Fabales	Fabaceae	Trifolium	Trifolium_occidentale	2002	rbcL	rbcLa-F	rbcLr590	569	29	7	36	533	4	11	529	522	59	6.33	0.75	2.06	99.25	97.94	569	13	31	44	525	4	7	521	518	60	7.73	0.76	1.33	99.24	98.67	579	1058	8	18	1050	1040	60	0.76
NMW966	POWNA766-10	JN890919	Herbarium	Fabales	Fabaceae	Trifolium	Trifolium_ornithopodioides	1993	rbcL	rbcLa-F	rbcLr590	639	31	91	122	517	10	79	507	438	41	19.09	1.93	15.28	98.07	84.72	716	167	51	218	498	5	34	493	464	43	30.45	1	6.83	99	93.17	567	1015	15	113	1000	902	42	1.48
NMW4236	POWNA1453-12	JN891327	Herbarium	Fabales	Fabaceae	Trifolium	Trifolium_ornithopodioides	1958	rbcL	rbcLa-F	rbcLr590	568	30	9	39	529	4	4	525	525	60	6.87	0.76	0.76	99.24	99.24	571	13	34	47	524	4	6	520	518	60	8.23	0.76	1.15	99.24	98.85	574	1053	8	10	1045	1043	60	0.76
NMW4235	POWNA1455-12	JN891664	Herbarium	Fabales	Fabaceae	Trifolium	Trifolium_ornithopodioides	1992	rbcL	rbcLa-F	rbcLr590	565	29	7	36	529	4	7	525	522	59	6.37	0.76	1.32	99.24	98.68	568	0	31	31	537	4	10	533	527	59	5.46	0.74	1.86	99.26	98.14	586	1066	8	17	1058	1049	59	0.75
NBGW6007	POWNB208-10	JN893083	Fresh	Fabales	Fabaceae	Trifolium	Trifolium_pratense	2010	rbcL	rbcLa-F	rbcLr590	564	26	16	42	522	19	39	503	483	55	7.45	3.64	7.47	96.36	92.53	647	98	28	126	521	4	7	517	514	59	19.47	0.77	1.34	99.23	98.66	564	1043	23	46	1020	997	57	2.21
NMW4238	POWNA1447-12	JN891321	Herbarium	Fabales	Fabaceae	Trifolium	Trifolium_pratense	1988	rbcL	rbcLa-F	rbcLr590	566	27	6	33	533	4	6	529	527	60	5.83	0.75	1.13	99.25	98.87	566	14	27	41	525	4	4	521	521	60	7.24	0.76	0.76	99.24	99.24	577	1058	8	10	1050	1048	60	0.76
NMW4237	POWNA1454-12	JN891328	Herbarium	Fabales	Fabaceae	Trifolium	Trifolium_pratense	1985	rbcL	rbcLa-F	rbcLr590	568	28	9	37	531	4	7	527	524	60	6.51	0.75	1.32	99.25	98.68	568	14	26	40	528	4	6	524	522	60	7.04	0.76	1.14	99.24	98.86	576	1059	8	13	1051	1046	60	0.76
NBGW5010	POWNA767-10	JN891336	Herbarium	Fabales	Fabaceae	Trifolium	Trifolium_repens	2008	rbcL	rbcLa-F	rbcLr590	563	42	17	59	504	11	19	493	485	55	10.48	2.18	3.77	97.82	96.23	563	17	81	98	465	10	40	455	425	50	17.41	2.15	8.6	97.85	91.4	565	969	21	59	948	910	53	2.17
NBGW7259	POWNA1808-12	JN891881	Fresh	Fabales	Fabaceae	Trifolium	Trifolium_repens	2011	rbcL	rbcLa-F	rbcLr590	565	27	3	30	535	4	10	531	525	58	5.31	0.75	1.87	99.25	98.13	567	11	35	46	521	4	11	517	510	55	8.11	0.77	2.11	99.23	97.89	579	1056	8	21	1048	1035	57	0.76
NMW4240	POWNA2583-12	JN892961	Herbarium	Fabales	Fabaceae	Trifolium	Trifolium_repens	1980	rbcL	rbcLa-F	rbcLr590	564	26	13	39	525	4	4	521	521	60	6.91	0.76	0.76	99.24	99.24	566	15	24	39	527	4	7	523	520	60	6.89	0.76	1.33	99.24	98.67	569	1052	8	11	1044	1041	60	0.76
NMW4241	POWNA2582-12	JN892960	Herbarium	Fabales	Fabaceae	Trifolium	Trifolium_repens	1980	rbcL	rbcLa-F	rbcLr590	680	27	121	148	532	7	20	525	512	53	21.76	1.32	3.76	98.68	96.24	563	12	25	37	526	4	22	522	504	55	6.57	0.76	4.18	99.24	95.82	578	1058	11	42	1047	1016	54	1.04
NMW6171	POWNA1728-12	JN891763	Fresh	Fabales	Fabaceae	Trifolium	Trifolium_repens	2011	rbcL	rbcLa-F	rbcLr590	564	26	13	39	525	4	8	521	517	59	6.91	0.76	1.52	99.24	98.48	566	11	26	37	529	6	11	523	518	59	6.54	1.13	2.08	98.87	97.92	570	1054	10	19	1044	1035	59	0.95
NMW968	POWNA768-10	JN890927	Herbarium	Fabales	Fabaceae	Trifolium	Trifolium_scabrum	2007	rbcL	rbcLa-F	rbcLr590	636	30	89	119	517	5	37	512	480	44	18.71	0.97	7.16	99.03	92.84	642	95	27	122	520	8	64	512	456	42	19	1.54	12.31	98.46	87.69	566	1037	13	101	1024	936	43	1.25
NMW4243	POWNA2580-12	JN892958	Herbarium	Fabales	Fabaceae	Trifolium	Trifolium_scabrum	1987	rbcL	rbcLa-F	rbcLr590	565	27	10	37	528	4	4	524	524	60	6.55	0.76	0.76	99.24	99.24	569	13	33	46	523	4	6	519	517	60	8.08	0.76	1.15	99.24	98.85	573	1051	8	10	1043	1041	60	0.76
NMW4242	POWNA2581-12	JN892959	Herbarium	Fabales	Fabaceae	Trifolium	Trifolium_scabrum	1999	rbcL	rbcLa-F	rbcLr590	568	29	11	40	528	4	7	524	521	60	7.04	0.76	1.33	99.24	98.67	568	10	29	39	529	4	13	525	516	59	6.87	0.76	2.46	99.24	97.54	575	1057	8	20	1049	1037	59	0.76
NMW4245	POWNA2578-12	JN891974	Herbarium	Fabales	Fabaceae	Trifolium	Trifolium_squamosum	1986	rbcL	rbcLa-F	rbcLr590	567	29	10	39	528	4	6	524	522	60	6.88	0.76	1.14	99.24	98.86	567	15	29	44	523	4	5	519	518	60	7.76	0.76	0.96	99.24	99.04	569	1051	8	11	1043	1040	60	0.76
NMW985	POWNA769-10	JN892777	Herbarium	Fabales	Fabaceae	Trifolium	Trifolium_squamosum	1993	rbcL	rbcLa-F	rbcLr590	562	23	17	40	522	4	43	518	479	44	7.12	0.77	8.24	99.23	91.76	547	4	30	34	513	6	45	507	468	45	6.22	1.17	8.77	98.83	91.23	565	1035	10	88	1025	947	45	0.97
NMW4244	POWNA2579-12	JN892957	Herbarium	Fabales	Fabaceae	Trifolium	Trifolium_squamosum	1990	rbcL	rbcLa-F	rbcLr590	568	31	11	42	526	4	7	522	519	60	7.39	0.76	1.33	99.24	98.67	569	0	31	31	538	4	9	534	529	59	5.45	0.74	1.67	99.26	98.33	583	1064	8	16	1056	1048	59	0.75
NMW4247	POWNA2576-12	JN892954	Herbarium	Fabales	Fabaceae	Trifolium	Trifolium_striatum	1972	rbcL	rbcLa-F	rbcLr590	567	28	9	37	530	4	8	526	522	60	6.53	0.75	1.51	99.25	98.49	570	15	31	46	524	4	8	520	516	60	8.07	0.76	1.53	99.24	98.47	574	1054	8	16	1046	1038	60	0.76
NMW965	POWNA770-10	JN890920	Herbarium	Fabales	Fabaceae	Trifolium	Trifolium_striatum	1993	rbcL	rbcLa-F	rbcLr590	564	25	15	40	524	5	41	519	483	44	7.09	0.95	7.82	99.05	92.18	560	12	23	35	525	4	19	521	506	51	6.25	0.76	3.62	99.24	96.38	571	1049	9	60	1040	989	48	0.86
NMW4246	POWNA2577-12	JN892955	Herbarium	Fabales	Fabaceae	Trifolium	Trifolium_striatum	1969	rbcL	rbcLa-F	rbcLr590	566	29	12	41	525	4	6	521	519	60	7.24	0.76	1.14	99.24	98.86	568	1	29	30	538	4	12	534	526	59	5.28	0.74	2.23	99.26	97.77	581	1063	8	18	1055	1045	59	0.75
NMW4248	POWNA2575-12	JN892953	Herbarium	Fabales	Fabaceae	Trifolium	Trifolium_strictum	1936	rbcL	rbcLa-F	rbcLr590	570	40	13	53	517	4	4	513	513	60	9.3	0.77	0.77	99.23	99.23	568	11	38	49	519	4	8	515	511	60	8.63	0.77	1.54	99.23	98.46	572	1036	8	12	1028	1024	60	0.77
NMW4250	POWNA2758-12	JN893214	Herbarium	Fabales	Fabaceae	Trifolium	Trifolium_strictum	1955	rbcL	rbcLa-F	rbcLr590	570	33	6	39	531	9	16	522	515	57	6.84	1.69	3.01	98.31	96.99	573	15	34	49	524	5	10	519	514	59	8.55	0.95	1.91	99.05	98.09	580	1055	14	26	1041	1029	58	1.33
NMW4249	POWNA2574-12	JN892952	Herbarium	Fabales	Fabaceae	Trifolium	Trifolium_strictum	1996	rbcL	rbcLa-F	rbcLr590	571	33	11	44	527	4	6	523	521	60	7.71	0.76	1.14	99.24	98.86	570	5	37	42	528	4	17	524	511	56	7.37	0.76	3.22	99.24	96.78	580	1055	8	23	1047	1032	58	0.76
NMW967	POWNA771-10	JN890918	Herbarium	Fabales	Fabaceae	Trifolium	Trifolium_subterraneum	1983	rbcL	rbcLa-F	rbcLr590	618	35	65	100	518	10	52	508	466	42	16.18	1.93	10.04	98.07	89.96	632	84	52	136	496	4	25	492	471	46	21.52	0.81	5.04	99.19	94.96	568	1014	14	77	1000	937	44	1.38
NMW4251	POWNA2759-12	JN893215	Herbarium	Fabales	Fabaceae	Trifolium	Trifolium_subterraneum	2000	rbcL	rbcLa-F	rbcLr590	571	30	10	40	531	6	29	525	502	51	7.01	1.13	5.46	98.87	94.54	571	17	29	46	525	4	7	521	518	60	8.06	0.76	1.33	99.24	98.67	574	1056	10	36	1046	1020	55	0.95
NMW962	POWNA772-10	JN892968	Herbarium	Fabales	Fabaceae	Trifolium	Trifolium_suffocatum	1978	rbcL	rbcLa-F	rbcLr590	616	30	68	98	518	7	45	511	473	43	15.91	1.35	8.69	98.65	91.31	632	85	34	119	513	4	21	509	492	49	18.83	0.78	4.09	99.22	95.91	567	1031	11	66	1020	965	46	1.07
NMW4255	POWNA2755-12	JN893212	Herbarium	Fabales	Fabaceae	Trifolium	Trifolium_suffocatum	1954	rbcL	rbcLa-F	rbcLr590	578	64	1	65	513	4	25	509	488	56	11.25	0.78	4.87	99.22	95.13	577	0	66	66	511	10	21	501	490	57	11.44	1.96	4.11	98.04	95.89	595	1024	14	46	1010	978	56	1.37
NMW4257	POWNA2855-12	JN893274	Herbarium	Fabales	Fabaceae	Ulex	Ulex_europaeus	1994	rbcL	rbcLa-F	rbcLr590	573	33	13	46	527	4	10	523	517	58	8.03	0.76	1.9	99.24	98.1	569	7	45	52	517	4	10	513	507	60	9.14	0.77	1.93	99.23	98.07	577	1044	8	20	1036	1024	59	0.77
NBGW5015	POWNA781-10	JN891334	Herbarium	Fabales	Fabaceae	Ulex	Ulex_europaeus	2008	rbcL	rbcLa-F	rbcLr590	556	18	16	34	522	4	11	518	511	54	6.12	0.77	2.11	99.23	97.89	564	16	25	41	523	5	30	518	493	51	7.27	0.96	5.74	99.04	94.26	570	1045	9	41	1036	1004	52	0.86
NMW4259	POWNA2844-12	JN893336	Herbarium	Fabales	Fabaceae	Ulex	Ulex_gallii	1970	rbcL	rbcLa-F	rbcLr590	571	46	4	50	521	4	18	517	503	54	8.76	0.77	3.45	99.23	96.55	575	6	53	59	516	7	18	509	498	55	10.26	1.36	3.49	98.64	96.51	589	1037	11	36	1026	1001	55	1.06
NMW949	POWNA782-10	JN893750	Herbarium	Fabales	Fabaceae	Ulex	Ulex_gallii	2002	rbcL	rbcLa-F	rbcLr590	567	25	19	44	523	7	42	516	481	44	7.76	1.34	8.03	98.66	91.97	558	13	41	54	504	5	41	499	463	46	9.68	0.99	8.13	99.01	91.87	568	1027	12	83	1015	944	45	1.17
NMW4258	POWNA2752-12	JN893210	Herbarium	Fabales	Fabaceae	Ulex	Ulex_gallii	1994	rbcL	rbcLa-F	rbcLa-R	574	26	20	46	528	4	6	524	522	60	8.01	0.76	1.14	99.24	98.86	575	13	20	33	542	4	9	538	533	59	5.74	0.74	1.66	99.26	98.34	574	1070	8	15	1062	1055	59	0.75
NMW929	POWNA809-10	JN891891	Herbarium	Fabales	Fabaceae	Vicia	Vicia_bithynica	1936	rbcL	rbcLa-F	rbcLr590	883	28	332	360	523	5	14	518	509	51	40.77	0.96	2.68	99.04	97.32	841	296	28	324	517	4	11	513	506	56	38.53	0.77	2.13	99.23	97.87	565	1040	9	25	1031	1015	53	0.87
NMW4260	POWNA2926-12	JN893456	Herbarium	Fabales	Fabaceae	Vicia	Vicia_bithynica	1957	rbcL	rbcLa-F	rbcLr590	566	16	10	26	540	4	11	536	529	59	4.59	0.74	2.04	99.26	97.96	569	15	28	43	526	4	8	522	518	60	7.56	0.76	1.52	99.24	98.48	572	1066	8	19	1058	1047	60	0.75
NMW4262	POWNA2928-12	JN893458	Herbarium	Fabales	Fabaceae	Vicia	Vicia_cracca	1962	rbcL	rbcLa-F	rbcLr590	566	30	6	36	530	4	9	526	521	59	6.36	0.75	1.7	99.25	98.3	560	295	231	526	34	4	22	30	12	28	93.93	11.76	64.71	88.24	35.29	530	564	8	31	556	533	57	1.42
NMW913	POWNA810-10	JN891166	Herbarium	Fabales	Fabaceae	Vicia	Vicia_cracca	1987	rbcL	rbcLa-F	rbcLr590	560	24	13	37	523	7	36	516	487	44	6.61	1.34	6.88	98.66	93.12	642	94	29	123	519	6	26	513	493	48	19.16	1.16	5.01	98.84	94.99	568	1042	13	62	1029	980	46	1.25
NMW4263	POWNA2927-12	JN893457	Herbarium	Fabales	Fabaceae	Vicia	Vicia_cracca	1993	rbcL	rbcLa-F	rbcLr590	567	26	6	32	535	4	9	531	526	60	5.64	0.75	1.68	99.25	98.32	570	12	26	38	532	4	7	528	525	60	6.67	0.75	1.32	99.25	98.68	581	1067	8	16	1059	1051	60	0.75
NMW6365	POWNA1494-12	JN891387	Fresh	Fabales	Fabaceae	Vicia	Vicia_cracca	2011	rbcL	rbcLa-F	rbcLr590	569	29	5	34	535	4	8	531	527	58	5.98	0.75	1.5	99.25	98.5	567	11	26	37	530	4	8	526	522	60	6.53	0.75	1.51	99.25	98.49	579	1065	8	16	1057	1049	59	0.75
NMW4264	POWNA2930-12	JN893460	Herbarium	Fabales	Fabaceae	Vicia	Vicia_hirsuta	1979	rbcL	rbcLa-F	rbcLr590	568	29	10	39	529	4	9	525	520	59	6.87	0.76	1.7	99.24	98.3	569	20	33	53	516	4	7	512	509	59	9.31	0.78	1.36	99.22	98.64	565	1045	8	16	1037	1029	59	0.77
NMW4266	POWNA2932-12	JN893462	Herbarium	Fabales	Fabaceae	Vicia	Vicia_hirsuta	1980	rbcL	rbcLa-F	rbcLr590	568	28	13	41	527	7	18	520	509	57	7.22	1.33	3.42	98.67	96.58	568	12	33	45	523	4	8	519	515	59	7.92	0.76	1.53	99.24	98.47	571	1050	11	26	1039	1024	58	1.05
NMW4265	POWNA2929-12	JN893459	Herbarium	Fabales	Fabaceae	Vicia	Vicia_hirsuta	1962	rbcL	rbcLa-F	rbcLr590	563	26	13	39	524	4	5	520	519	60	6.93	0.76	0.95	99.24	99.05	566	11	25	36	530	4	8	526	522	60	6.36	0.75	1.51	99.25	98.49	572	1054	8	13	1046	1041	60	0.76
NMW914	POWNA811-10	JN891171	Herbarium	Fabales	Fabaceae	Vicia	Vicia_lathyroides	1955	rbcL	rbcLa-F	rbcLr590	565	28	18	46	519	5	44	514	475	43	8.14	0.96	8.48	99.04	91.52	624	74	30	104	520	11	72	509	448	44	16.67	2.12	13.85	97.88	86.15	567	1039	16	116	1023	923	44	1.54
NMW4267	POWNA2931-12	JN893461	Herbarium	Fabales	Fabaceae	Vicia	Vicia_lathyroides	1972	rbcL	rbcLa-F	rbcLr590	565	18	10	28	537	4	11	533	526	59	4.96	0.74	2.05	99.26	97.95	566	11	29	40	526	4	9	522	517	60	7.07	0.76	1.71	99.24	98.29	574	1063	8	20	1055	1043	60	0.75
NMW4270	POWNA3073-12	JN893682	Herbarium	Fabales	Fabaceae	Vicia	Vicia_orobus	1961	rbcL	rbcLa-F	rbcLr590	567	30	6	36	531	4	6	527	525	60	6.35	0.75	1.13	99.25	98.87	570	13	32	45	525	4	6	521	519	60	7.89	0.76	1.14	99.24	98.86	576	1056	8	12	1048	1044	60	0.76
NMW4269	POWNA2924-12	JN893455	Herbarium	Fabales	Fabaceae	Vicia	Vicia_orobus	1988	rbcL	rbcLa-F	rbcLr590	566	28	11	39	527	4	4	523	523	60	6.89	0.76	0.76	99.24	99.24	567	15	29	44	523	4	5	519	518	60	7.76	0.76	0.96	99.24	99.04	570	1050	8	9	1042	1041	60	0.76
NMW897	POWNA812-10	JN890647	Herbarium	Fabales	Fabaceae	Vicia	Vicia_orobus	1994	rbcL	rbcLa-F	rbcLr590	563	24	19	43	520	5	27	515	493	46	7.64	0.96	5.19	99.04	94.81	562	15	24	39	523	4	21	519	502	52	6.94	0.76	4.02	99.24	95.98	567	1043	9	48	1034	995	49	0.86
NMW4272	POWNA3071-12	JN893680	Herbarium	Fabales	Fabaceae	Vicia	Vicia_sativa	1987	rbcL	rbcLa-F	rbcLr590	572	31	13	44	528	4	5	524	523	60	7.69	0.76	0.95	99.24	99.05	568	13	31	44	524	4	6	520	518	60	7.75	0.76	1.15	99.24	98.85	571	1052	8	11	1044	1041	60	0.76
NMW4271	POWNA3074-12	JN893683	Herbarium	Fabales	Fabaceae	Vicia	Vicia_sativa	1974	rbcL	rbcLa-F	rbcLr590	565	27	14	41	524	4	6	520	518	60	7.26	0.76	1.15	99.24	98.85	569	15	28	43	526	4	7	522	519	60	7.56	0.76	1.33	99.24	98.67	568	1050	8	13	1042	1037	60	0.76
NMW875	POWNA813-10	JN892351	Herbarium	Fabales	Fabaceae	Vicia	Vicia_sativa	1992	rbcL	rbcLa-F	rbcLr590	561	23	19	42	519	5	50	514	469	44	7.49	0.96	9.63	99.04	90.37	559	19	22	41	518	8	54	510	464	44	7.33	1.54	10.42	98.46	89.58	561	1037	13	104	1024	933	44	1.25
NMW916	POWNA814-10	JN891169	Herbarium	Fabales	Fabaceae	Vicia	Vicia_sepium	1988	rbcL	rbcLa-F	rbcLr590	634	26	87	113	521	5	36	516	485	45	17.82	0.96	6.91	99.04	93.09	705	157	25	182	523	5	17	518	506	47	25.82	0.96	3.25	99.04	96.75	570	1044	10	53	1034	991	46	0.96
NMW4274	POWNA3069-12	JN893678	Herbarium	Fabales	Fabaceae	Vicia	Vicia_sepium	1987	rbcL	rbcLa-F	rbcLr590	564	24	9	33	531	4	7	527	524	60	5.85	0.75	1.32	99.25	98.68	567	13	28	41	526	4	6	522	520	60	7.23	0.76	1.14	99.24	98.86	574	1057	8	13	1049	1044	60	0.76
NMW4273	POWNA3072-12	JN893681	Herbarium	Fabales	Fabaceae	Vicia	Vicia_sepium	1999	rbcL	rbcLa-F	rbcLr590	570	32	10	42	528	4	8	524	520	59	7.37	0.76	1.52	99.24	98.48	568	1	33	34	534	4	9	530	525	59	5.99	0.75	1.69	99.25	98.31	584	1062	8	17	1054	1045	59	0.75
NMW917	POWNA815-10	JN891170	Herbarium	Fabales	Fabaceae	Vicia	Vicia_sylvatica	1994	rbcL	rbcLa-F	rbcLr590	639	32	89	121	518	6	39	512	479	44	18.94	1.16	7.53	98.84	92.47	697	144	55	199	498	7	41	491	457	43	28.55	1.41	8.23	98.59	91.77	565	1016	13	80	1003	936	43	1.28
NMW4275	POWNA3070-12	JN893679	Herbarium	Fabales	Fabaceae	Vicia	Vicia_sylvatica	1963	rbcL	rbcLa-F	rbcLr590	568	28	12	40	528	4	5	524	523	60	7.04	0.76	0.95	99.24	99.05	568	11	28	39	529	4	9	525	520	60	6.87	0.76	1.7	99.24	98.3	576	1057	8	14	1049	1043	60	0.76
NMW4276	POWNA3067-12	JN893676	Herbarium	Fabales	Fabaceae	Vicia	Vicia_sylvatica	1979	rbcL	rbcLa-F	rbcLr590	565	27	9	36	529	4	6	525	523	60	6.37	0.76	1.13	99.24	98.87	572	0	31	31	541	3	6	538	535	59	5.42	0.55	1.11	99.45	98.89	585	1070	7	12	1063	1058	59	0.65
NMW915	POWNA816-10	JN891172	Herbarium	Fabales	Fabaceae	Vicia	Vicia_tetrasperma	1994	rbcL	rbcLa-F	rbcLr590	638	25	91	116	522	6	33	516	489	45	18.18	1.15	6.32	98.85	93.68	680	136	44	180	500	5	32	495	468	48	26.47	1	6.4	99	93.6	570	1022	11	65	1011	957	46	1.08
NMW4278	POWNA3076-12	JN893684	Herbarium	Fabales	Fabaceae	Vicia	Vicia_tetrasperma	1991	rbcL	rbcLa-F	rbcLr590	570	34	5	39	531	4	8	527	523	60	6.84	0.75	1.51	99.25	98.49	573	4	50	54	519	4	5	515	514	60	9.42	0.77	0.96	99.23	99.04	588	1050	8	13	1042	1037	60	0.76
NMW4277	POWNA3068-12	JN893677	Herbarium	Fabales	Fabaceae	Vicia	Vicia_tetrasperma	2009	rbcL	rbcLa-F	rbcLr590	567	30	6	36	531	4	6	527	525	60	6.35	0.75	1.13	99.25	98.87	568	10	26	36	532	5	14	527	518	59	6.34	0.94	2.63	99.06	97.37	580	1063	9	20	1054	1043	60	0.85
NMW5050	POWNB020-10	JN891752	Fresh	Fabales	Polygalaceae	Polygala	Polygala_serpyllifolia	2010	rbcL	rbcLa-F	rbcLr590	571	29	15	44	527	4	6	523	521	59	7.71	0.76	1.14	99.24	98.86	569	11	32	43	526	6	26	520	500	49	7.56	1.14	4.94	98.86	95.06	575	1053	10	32	1043	1021	54	0.95
NMW6264	POWNA3048-12	JN893631	Fresh	Fabales	Polygalaceae	Polygala	Polygala_serpyllifolia	2011	rbcL	rbcLa-F	rbcLr590	566	26	14	40	526	4	7	522	519	58	7.07	0.76	1.33	99.24	98.67	569	13	27	40	529	4	9	525	520	59	7.03	0.76	1.7	99.24	98.3	569	1055	8	16	1047	1039	59	0.76
NMW4374	POWNA1934-12	JN892064	Herbarium	Fabales	Polygalaceae	Polygala	Polygala_serpyllifolia	1991	rbcL	rbcLa-F	rbcLr590	569	32	10	42	527	4	8	523	519	59	7.38	0.76	1.52	99.24	98.48	566	11	26	37	529	4	8	525	521	59	6.54	0.76	1.51	99.24	98.49	573	1056	8	16	1048	1040	59	0.76
NMW4375	POWNA1933-12	JN892063	Herbarium	Fabales	Polygalaceae	Polygala	Polygala_serpyllifolia	1953	rbcL	rbcLa-F	rbcLr590	556	24	4	28	528	4	6	524	522	60	5.04	0.76	1.14	99.24	98.86	569	10	23	33	536	4	9	532	527	59	5.8	0.75	1.68	99.25	98.32	573	1064	8	15	1056	1049	59	0.75
NMW644	POWNA548-10	JN891130	Herbarium	Fabales	Polygalaceae	Polygala	Polygala_vulgaris	2000	rbcL	rbcLa-F	rbcLr590	699	29	149	178	521	5	40	516	481	44	25.46	0.96	7.68	99.04	92.32	731	178	93	271	460	10	43	450	417	40	37.07	2.17	9.35	97.83	90.65	570	981	15	83	966	898	42	1.53
NMW4377	POWNA1932-12	JN892062	Herbarium	Fabales	Polygalaceae	Polygala	Polygala_vulgaris	1955	rbcL	rbcLa-F	rbcLr590	567	38	1	39	528	4	6	524	522	58	6.88	0.76	1.14	99.24	98.86	571	0	43	43	528	3	12	525	516	53	7.53	0.57	2.27	99.43	97.73	590	1056	7	18	1049	1038	56	0.66
NMW6398	POWNA1393-12	JN892016	Fresh	Fabales	Polygalaceae	Polygala	Polygala_vulgaris	2011	rbcL	rbcLa-F	rbcLr590	565	29	7	36	529	4	6	525	523	58	6.37	0.76	1.13	99.24	98.87	567	11	26	37	530	4	7	526	523	60	6.53	0.75	1.32	99.25	98.68	576	1059	8	13	1051	1046	59	0.76
NMW4378	POWNA1931-12	JN892061	Herbarium	Fabales	Polygalaceae	Polygala	Polygala_vulgaris	2002	rbcL	rbcLa-F	rbcLr590	568	30	7	37	531	6	14	525	517	59	6.51	1.13	2.64	98.87	97.36	564	10	22	32	532	4	11	528	521	59	5.67	0.75	2.07	99.25	97.93	579	1063	10	25	1053	1038	59	0.94
NMW3742	POWNA2809-12	JN893291	Herbarium	Fagales	Betulaceae	Alnus	Alnus_glutinosa	1999	rbcL	rbcLa-F	rbcLr590	569	31	10	41	528	8	29	520	499	46	7.21	1.52	5.49	98.48	94.51	574	32	62	94	480	66	155	414	325	35	16.38	13.75	32.29	86.25	67.71	555	1008	74	184	934	824	41	7.34
NMW3743	POWNA2808-12	JN893290	Herbarium	Fagales	Betulaceae	Alnus	Alnus_glutinosa	1973	rbcL	rbcLa-F	rbcLr590	569	34	13	47	522	4	8	518	514	58	8.26	0.77	1.53	99.23	98.47	572	12	37	49	523	5	8	518	515	59	8.57	0.96	1.53	99.04	98.47	571	1045	9	16	1036	1029	58	0.86
NMW6162	POWNA1190-12	JN890945	Fresh	Fagales	Betulaceae	Alnus	Alnus_glutinosa	2011	rbcL	rbcLa-F	rbcLr590	570	31	5	36	534	4	10	530	524	57	6.32	0.75	1.87	99.25	98.13	568	12	33	45	523	4	7	519	516	60	7.92	0.76	1.34	99.24	98.66	579	1057	8	17	1049	1040	58	0.76
NBGW7120	POWNB180-10	JN893730	Fresh	Fagales	Betulaceae	Alnus	Alnus_glutinosa	2010	rbcL	rbcLa-F	rbcLr590	567	29	13	42	525	4	8	521	517	59	7.41	0.76	1.52	99.24	98.48	568	13	25	38	530	4	12	526	518	58	6.69	0.75	2.26	99.25	97.74	570	1055	8	20	1047	1035	59	0.76
NMW874	POWNA072-10	JN892352	Herbarium	Fagales	Betulaceae	Betula	Betula_pendula	1993	rbcL	rbcLa-F	rbcLr590	624	26	77	103	521	10	67	511	454	41	16.51	1.92	12.86	98.08	87.14	620	76	25	101	519	6	34	513	485	47	16.29	1.16	6.55	98.84	93.45	564	1040	16	101	1024	939	44	1.54
NMW3745	POWNA2814-12	JN892640	Herbarium	Fagales	Betulaceae	Betula	Betula_pendula	1939	rbcL	rbcLa-F	rbcLr590	573	38	3	41	532	4	6	528	526	59	7.16	0.75	1.13	99.25	98.87	574	5	54	59	515	4	11	511	504	60	10.28	0.78	2.14	99.22	97.86	588	1047	8	17	1039	1030	59	0.76
NMW6278	POWNA2164-12	JN892378	Fresh	Fagales	Betulaceae	Betula	Betula_pendula	2011	rbcL	rbcLa-F	rbcLr590	565	26	9	35	530	4	9	526	521	58	6.19	0.75	1.7	99.25	98.3	563	10	30	40	523	4	10	519	513	60	7.1	0.76	1.91	99.24	98.09	573	1053	8	19	1045	1034	59	0.76
NMW3744	POWNA2818-12	JN893300	Herbarium	Fagales	Betulaceae	Betula	Betula_pendula	1975	rbcL	rbcLa-F	rbcLr590	556	30	2	32	524	4	5	520	519	60	5.76	0.76	0.95	99.24	99.05	571	1	32	33	538	4	13	534	525	59	5.78	0.74	2.42	99.26	97.58	581	1062	8	18	1054	1044	59	0.75
NMW3747	POWNA2811-12	JN893293	Herbarium	Fagales	Betulaceae	Betula	Betula_pubescens	1970	rbcL	rbcLa-F	rbcLajf634R	632	90	64	154	478	20	85	458	393	38	24.37	4.18	17.78	95.82	82.22	628	8	99	107	521	10	50	511	471	44	17.04	1.92	9.6	98.08	90.4	586	999	30	135	969	864	41	3
NMW086	POWNA073-10	JN893073	Herbarium	Fagales	Betulaceae	Betula	Betula_pubescens	1999	rbcL	rbcLa-F	rbcLr590	548	25	2	27	521	6	32	515	489	45	4.93	1.15	6.14	98.85	93.86	557	14	30	44	513	4	9	509	504	54	7.9	0.78	1.75	99.22	98.25	566	1034	10	41	1024	993	49	0.97
NMW6303	POWNA2807-12	JN893289	Fresh	Fagales	Betulaceae	Betula	Betula_pubescens	2011	rbcL	rbcLa-F	rbcLr590	565	27	5	32	533	4	10	529	523	58	5.66	0.75	1.88	99.25	98.12	566	8	30	38	528	4	12	524	516	59	6.71	0.76	2.27	99.24	97.73	580	1061	8	22	1053	1039	59	0.75
NMW6308	POWNA2798-12	JN893280	Fresh	Fagales	Betulaceae	Betula	Betula_pubescens	2011	rbcL	rbcLa-F	rbcLr590	565	31	3	34	531	4	9	527	522	57	6.02	0.75	1.69	99.25	98.31	568	4	34	38	530	4	7	526	523	60	6.69	0.75	1.32	99.25	98.68	584	1061	8	16	1053	1045	58	0.75
NMW3749	POWNA2825-12	JN892644	Herbarium	Fagales	Betulaceae	Carpinus	Carpinus_betulus	1999	rbcL	rbcLa-F	rbcLr590	574	36	2	38	536	10	42	526	494	48	6.62	1.87	7.84	98.13	92.16	571	16	32	48	523	7	34	516	489	48	8.41	1.34	6.5	98.66	93.5	581	1059	17	76	1042	983	48	1.61
NBGW5025	POWNA149-10	JN893788	Fresh	Fagales	Betulaceae	Carpinus	Carpinus_betulus	2008	rbcL	rbcLa-F	rbcLr590	561	23	13	36	525	11	23	514	502	55	6.42	2.1	4.38	97.9	95.62	563	12	24	36	527	7	17	520	510	54	6.39	1.33	3.23	98.67	96.77	570	1052	18	40	1034	1012	55	1.71
NMW3748	POWNA2764-12	JN893226	Herbarium	Fagales	Betulaceae	Carpinus	Carpinus_betulus	2007	rbcL	rbcLa-F	rbcLr590	572	31	13	44	528	4	9	524	519	56	7.69	0.76	1.7	99.24	98.3	567	2	32	34	533	5	11	528	522	56	6	0.94	2.06	99.06	97.94	582	1061	9	20	1052	1041	56	0.85
NMW891	POWNA197-10	JN893317	Herbarium	Fagales	Betulaceae	Corylus	Corylus_avellana	1999	rbcL	rbcLa-F	rbcLr590	624	77	78	155	469	4	7	465	462	58	24.84	0.85	1.49	99.15	98.51	626	75	41	116	510	10	22	500	488	56	18.53	1.96	4.31	98.04	95.69	568	979	14	29	965	950	57	1.43
NMW3751	POWNA2481-12	JN891390	Herbarium	Fagales	Betulaceae	Corylus	Corylus_avellana	1953	rbcL	rbcLa-F	rbcLr590	564	34	3	37	527	14	29	513	498	53	6.56	2.66	5.5	97.34	94.5	571	3	52	55	516	8	23	508	493	53	9.63	1.55	4.46	98.45	95.54	588	1043	22	52	1021	991	53	2.11
NMW6163	POWNA1191-12	JN890946	Fresh	Fagales	Betulaceae	Corylus	Corylus_avellana	2011	rbcL	rbcLa-F	rbcLr590	571	36	6	42	529	4	6	525	523	53	7.36	0.76	1.13	99.24	98.87	566	7	35	42	524	4	15	520	509	56	7.42	0.76	2.86	99.24	97.14	577	1053	8	21	1045	1032	54	0.76
NMW6197	POWNA1996-12	JN892134	Fresh	Fagales	Betulaceae	Corylus	Corylus_avellana	2011	rbcL	rbcLa-F	rbcLr590	566	28	12	40	526	4	9	522	517	58	7.07	0.76	1.71	99.24	98.29	567	11	29	40	527	4	7	523	520	59	7.05	0.76	1.33	99.24	98.67	572	1053	8	16	1045	1037	59	0.76
NMW3750	POWNA2480-12	JN891389	Herbarium	Fagales	Betulaceae	Corylus	Corylus_avellana	1998	rbcL	rbcLa-F	rbcLr590	573	32	7	39	534	4	7	530	527	60	6.81	0.75	1.31	99.25	98.69	568	12	26	38	530	4	9	526	521	59	6.69	0.75	1.7	99.25	98.3	581	1064	8	16	1056	1048	59	0.75
NBGW6013	POWNB204-10	JN892816	Fresh	Fagales	Fagaceae	Castanea	Castanea_sativa	2010	rbcL	rbcLa-F	rbcLr590	568	31	13	44	524	4	9	520	515	58	7.75	0.76	1.72	99.24	98.28	574	15	51	66	508	5	13	503	495	50	11.5	0.98	2.56	99.02	97.44	569	1032	9	22	1023	1010	54	0.87
NMW3754	POWNA2483-12	JN892846	Herbarium	Fagales	Fagaceae	Castanea	Castanea_sativa	1961	rbcL	rbcLa-F	rbcLa-R	589	60	7	67	522	5	12	517	510	56	11.38	0.96	2.3	99.04	97.7	575	13	46	59	516	4	5	512	511	59	10.26	0.78	0.97	99.22	99.03	585	1038	9	17	1029	1021	58	0.87
NMW5291	POWNA1120-12	JN891888	Fresh	Fagales	Fagaceae	Castanea	Castanea_sativa	2010	rbcL	rbcLa-F	rbcLr590	664	24	110	134	530	4	7	526	523	57	20.18	0.75	1.32	99.25	98.68	567	11	25	36	531	4	12	527	519	59	6.35	0.75	2.26	99.25	97.74	576	1061	8	19	1053	1042	58	0.75
NBGW7297	POWNA2145-12	JN891651	Fresh	Fagales	Fagaceae	Castanea	Castanea_sativa	2011	rbcL	rbcLa-F	rbcLr590	568	31	5	36	532	4	11	528	521	58	6.34	0.75	2.07	99.25	97.93	567	3	30	33	534	4	6	530	528	60	5.82	0.75	1.12	99.25	98.88	585	1066	8	17	1058	1049	59	0.75
NMW3756	POWNA2485-12	JN891396	Herbarium	Fagales	Fagaceae	Fagus	Fagus_sylvatica	1999	rbcL	rbcLa-F	rbcLr590	567	30	6	36	531	4	11	527	520	55	6.35	0.75	2.07	99.25	97.93	569	14	31	45	524	4	10	520	514	59	7.91	0.76	1.91	99.24	98.09	574	1055	8	21	1047	1034	57	0.76
NMW3755	POWNA1498-12	JN891182	Herbarium	Fagales	Fagaceae	Fagus	Fagus_sylvatica	1995	rbcL	rbcLa-F	rbcLr590	572	30	7	37	535	9	10	526	525	59	6.47	1.68	1.87	98.32	98.13	567	9	28	37	530	4	10	526	520	59	6.53	0.75	1.89	99.25	98.11	583	1065	13	20	1052	1045	59	1.22
NBGW4041	POWNA283-10	JN891655	Fresh	Fagales	Fagaceae	Fagus	Fagus_sylvatica	2008	rbcL	rbcLa-F	rbcLr590	546	18	5	23	523	4	9	519	514	55	4.21	0.76	1.72	99.24	98.28	558	13	21	34	524	4	15	520	509	53	6.09	0.76	2.86	99.24	97.14	570	1047	8	24	1039	1023	54	0.76
NMW3758	POWNA1499-12	JN892849	Herbarium	Fagales	Fagaceae	Quercus	Quercus_petraea	1999	rbcL	rbcLa-F	rbcLr590	573	33	7	40	533	4	9	529	524	59	6.98	0.75	1.69	99.25	98.31	569	15	32	47	522	4	7	518	515	60	8.26	0.77	1.34	99.23	98.66	578	1055	8	16	1047	1039	60	0.76
NMW6040	POWNA1696-12	JN890841	Fresh	Fagales	Fagaceae	Quercus	Quercus_petraea	2011	rbcL	rbcLa-F	rbcLr590	568	29	4	33	535	4	11	531	524	58	5.81	0.75	2.06	99.25	97.94	566	12	26	38	528	4	8	524	520	60	6.71	0.76	1.52	99.24	98.48	578	1063	8	19	1055	1044	59	0.75
NMW6041	POWNA1695-12	JN890839	Fresh	Fagales	Fagaceae	Quercus	Quercus_petraea	2011	rbcL	rbcLa-F	rbcLr590	566	28	9	37	529	4	6	525	523	59	6.54	0.76	1.13	99.24	98.87	564	4	30	34	530	4	6	526	524	60	6.03	0.75	1.13	99.25	98.87	580	1059	8	12	1051	1047	59	0.76
NMW3760	POWNA2667-12	JN893095	Herbarium	Fagales	Fagaceae	Quercus	Quercus_robur	1995	rbcL	rbcLa-F	rbcLr590	570	253	71	324	246	50	123	196	123	29	56.84	20.33	50	79.67	50	574	51	163	214	360	19	71	341	289	39	37.28	5.28	19.72	94.72	80.28	476	606	69	194	537	412	35	11.39
[truncated: 1,832 more rows]
[truncated: 9 more columns]

## Sheet: matk quality statistics
ID	BOLD ID	GENBANK ID	Collection type	Order	Family	Genus	Species	Year collected	Primer type	Forward primer	Reverse primer	Forward read length	Forward 5' trimmed	Forward 3' trimmed	Forward total trimmed	Forward trimmed length	Forward trimmed bases QV < 20	Forward trimmed bases QV < 30	Forward trimmed bases QV > 20	Forward trimmed bases QV > 30	Forward trimmed mean QV	Forward trimmed %	Forward trimmed % QV < 20	Forward trimmed % QV < 30	Forward trimmed % QV > 20	Forward trimmed % QV > 30	Reverse read length	Reverse 5' trimmed	Reverse 3' trimmed	Reverse total trimmed	Reverse trimmed length	Reverse trimmed bases QV < 20	Reverse trimmed bases QV < 30	Reverse trimmed bases QV > 20	Reverse trimmed bases QV > 30	Reverse trimmed mean QV	Reverse trimmed %	Reverse trimmed % QV < 20	Reverse trimmed % QV < 30	Reverse trimmed % QV > 20	Reverse trimmed % QV > 30	Contig seq length	Contig total bases used	Contig QV < 20	Contig QV < 30	Contig QV >= 20	Contig QV >= 30	Contig mean QV	Contig % QV < 20
[truncated: 2,421 more rows]
[truncated: 9 more columns]

[truncated: 1 more sheets: Header key]
