# Supplementary material for: DNA Barcoding the Native Flowering Plants and Conifers of Wales
Source: PLoS One. 2012 Jun 6;7(6):e37945. doi: 10.1371/journal.pone.0037945 (PMC3368937; doi:10.1371/journal.pone.0037945)
Supplement: Dataset S3 — Discrimination for each species using BLAST, Neighbour-Joining trees and barcode gap analysis with pairwise and multiple alignments. (XLSX) [file pone.0037945.s006.xlsx]

## Sheet: Discrimination
				Tree	BLAST	Barcode gap (multiple)	Barcode gap (pairwise)	Tree	BLAST	Barcode gap (multiple)	Barcode gap (pairwise)	Tree	BLAST	Barcode gap (multiple)	Barcode gap (pairwise)
Order	Family	Genus	Species	rbcl	rbcl	rbcL	rbcL	matk	matk	matK	matK	both	both	both	both
Alismatales	Alismataceae	Alisma	Alisma plantago	1	1	1	1	1	1	1	1	1	1	1	1
Alismatales	Alismataceae	Luronium	Luronium natans	1	1	1	1	1	1	1	1	1	1	1	1
Alismatales	Araceae	Arum	Arum italicum	0	0	0	0	0	0	0	0	0	0	0	0
Alismatales	Araceae	Arum	Arum maculatum	0	0	0	0	0	0	0	0	0	0	0	0
Alismatales	Araceae	Lemna	Lemna trisulca	1	1	1	1	1	1	1	1	1	1	1	1
Alismatales	Araceae	Spirodela	Spirodela polyrhiza	1	1	1	1	1	1	1	1	1	1	1	1
Alismatales	Hydrocharitaceae	Hydrocharis	Hydrocharis morsus	1	1	1	1	1	1	1	1	1	1	1	1
Alismatales	Potamogetonaceae	Groenlandia	Groenlandia densa	1	1	1	1	1	1	1	1	1	1	1	1
Alismatales	Potamogetonaceae	Potamogeton	Potamogeton alpinus	0	0	0	0	1	1	1	1	1	1	1	1
Alismatales	Potamogetonaceae	Potamogeton	Potamogeton berchtoldii	0	0	0	0	1	1	0	0	1	1	0	0
Alismatales	Potamogetonaceae	Potamogeton	Potamogeton coloratus	1	0	0	0	1	1	1	1	1	1	1	1
Alismatales	Potamogetonaceae	Potamogeton	Potamogeton compressus	0	0	0	0	1	1	0	0	1	1	0	0
Alismatales	Potamogetonaceae	Potamogeton	Potamogeton filiformis	1	1	1	1	1	1	1	1	1	1	1	1
Alismatales	Potamogetonaceae	Potamogeton	Potamogeton natans	0	1	0	0	1	1	1	1	1	1	1	1
Alismatales	Potamogetonaceae	Potamogeton	Potamogeton obtusifolius	0	0	0	0	1	1	0	0	1	1	0	0
Alismatales	Potamogetonaceae	Potamogeton	Potamogeton pectinatus	1	1	1	1	1	1	1	1	1	1	1	1
Alismatales	Potamogetonaceae	Potamogeton	Potamogeton polygonifolius	1	0	0	0	1	1	1	1	1	1	1	1
Alismatales	Potamogetonaceae	Potamogeton	Potamogeton pusillus	0	0	0	0	0	0	0	0	0	0	0	0
Alismatales	Potamogetonaceae	Potamogeton	Potamogeton trichoides	0	0	0	0	0	0	0	0	0	0	0	0
Alismatales	Potamogetonaceae	Zannichellia	Zannichellia palustris	1	1	1	1	0	1	1	1	1	1	1	1
Alismatales	Ruppiaceae	Ruppia	Ruppia maritima	1	1	1	1	1	1	1	1	1	1	1	1
Alismatales	Zosteraceae	Zostera	Zostera noltei	1	1	1	1	1	1	1	1	1	1	1	1
Apiales	Apiaceae	Aegopodium	Aegopodium podagraria	0	0	0	0	0	0	0	0	0	0	0	0
Apiales	Apiaceae	Aethusa	Aethusa cynapium	1	1	1	1	1	1	1	1	1	1	1	1
Apiales	Apiaceae	Angelica	Angelica sylvestris	1	1	1	1	1	1	1	1	1	1	1	1
Apiales	Apiaceae	Anthriscus	Anthriscus caucalis	1	1	1	1	1	1	1	1	1	1	1	1
Apiales	Apiaceae	Anthriscus	Anthriscus sylvestris	1	1	1	1	1	1	1	1	1	1	1	1
Apiales	Apiaceae	Apium	Apium graveolens	1	1	1	1	1	1	1	1	1	1	1	1
Apiales	Apiaceae	Apium	Apium nodiflorum	1	1	1	1	1	1	0	0	1	1	1	1
Apiales	Apiaceae	Berula	Berula erecta	1	1	1	1	1	1	1	1	1	1	1	1
Apiales	Apiaceae	Bupleurum	Bupleurum tenuissimum	1	1	1	1	1	1	1	1	1	1	1	1
Apiales	Apiaceae	Carum	Carum verticillatum	1	1	1	1	1	1	1	1	1	1	1	1
Apiales	Apiaceae	Chaerophyllum	Chaerophyllum temulum	1	1	1	1	1	1	1	1	1	1	1	1
Apiales	Apiaceae	Cicuta	Cicuta virosa	1	1	1	1	1	1	1	1	1	1	1	1
Apiales	Apiaceae	Conium	Conium maculatum	1	1	1	1	1	1	1	1	1	1	1	1
Apiales	Apiaceae	Conopodium	Conopodium majus	1	1	1	1	1	1	1	1	1	1	1	1
Apiales	Apiaceae	Daucus	Daucus carota	1	1	1	1	1	1	1	1	1	1	1	1
Apiales	Apiaceae	Eryngium	Eryngium campestre	1	1	1	1	1	0	0	0	1	1	0	0
Apiales	Apiaceae	Eryngium	Eryngium maritimum	1	1	1	1	1	1	0	0	1	1	0	0
Apiales	Apiaceae	Foeniculum	Foeniculum vulgare	1	1	1	1	1	1	1	1	1	1	1	1
Apiales	Apiaceae	Heracleum	Heracleum sphondylium	1	0	0	0	1	1	1	1	1	1	1	1
Apiales	Apiaceae	Oenanthe	Oenanthe aquatica	0	0	0	0	1	1	1	1	1	1	1	1
Apiales	Apiaceae	Oenanthe	Oenanthe crocata	0	0	0	0	0	0	0	0	0	0	0	0
Apiales	Apiaceae	Oenanthe	Oenanthe fistulosa	0	0	0	0	1	1	1	1	1	1	1	1
Apiales	Apiaceae	Oenanthe	Oenanthe lachenalii	0	0	0	0	0	0	0	0	0	0	0	0
Apiales	Apiaceae	Oenanthe	Oenanthe pimpinelloides	0	0	0	0	1	1	1	1	1	1	1	1
Apiales	Apiaceae	Pastinaca	Pastinaca sativa	1	0	0	0	1	1	1	1	1	1	1	1
Apiales	Apiaceae	Petroselinum	Petroselinum crispum	1	1	1	1	0	0	0	0	1	1	1	1
Apiales	Apiaceae	Pimpinella	Pimpinella saxifraga	1	1	1	1	1	1	1	1	1	1	1	1
Apiales	Apiaceae	Sanicula	Sanicula europaea	1	1	1	1	1	1	1	1	1	1	1	1
Apiales	Apiaceae	Silaum	Silaum silaus	1	1	1	1	1	1	1	1	1	1	1	1
Apiales	Apiaceae	Torilis	Torilis arvensis	1	1	1	1	1	1	1	1	1	1	1	1
Apiales	Apiaceae	Torilis	Torilis japonica	1	1	1	1	1	1	1	1	1	1	1	1
Apiales	Apiaceae	Torilis	Torilis nodosa	1	1	1	1	1	1	1	1	1	1	1	1
Apiales	Araliaceae	Hedera	Hedera helix	1	1	1	1	1	1	1	1	1	1	1	1
Apiales	Araliaceae	Hydrocotyle	Hydrocotyle vulgaris	1	1	1	1	1	1	1	1	1	1	1	1
Aquifoliales	Aquifoliaceae	Ilex	Ilex aquifolium	1	1	1	1	1	1	1	1	1	1	1	1
Asparagales	Amaryllidaceae	Allium	Allium ursinum	1	1	1	1	1	1	1	1	1	1	1	1
Asparagales	Asparagaceae	Asparagus	Asparagus officinalis	0	0	0	0	0	0	0	0	0	0	0	0
Asparagales	Asparagaceae	Convallaria	Convallaria majalis	1	1	0	0	1	1	1	1	1	1	1	1
Asparagales	Asparagaceae	Polygonatum	Polygonatum multiflorum	0	0	0	0	1	1	1	1	0	1	1	1
Asparagales	Asparagaceae	Polygonatum	Polygonatum odoratum	1	1	0	0	0	1	1	1	0	1	1	1
Asparagales	Orchidaceae	Anacamptis	Anacamptis pyramidalis	1	1	0	0	1	1	1	1	1	1	1	1
Asparagales	Orchidaceae	Dactylorhiza	Dactylorhiza fuchsii	0	0	0	0	0	0	0	0	0	0	0	0
Asparagales	Orchidaceae	Dactylorhiza	Dactylorhiza incarnata	0	0	0	0	1	1	1	1	1	1	1	1
Asparagales	Orchidaceae	Dactylorhiza	Dactylorhiza maculata	0	0	0	0	1	1	1	1	1	1	1	1
Asparagales	Orchidaceae	Dactylorhiza	Dactylorhiza praetermissa	0	0	0	0	0	0	0	0	0	0	0	0
Asparagales	Orchidaceae	Dactylorhiza	Dactylorhiza purpurella	0	0	0	0	0	0	0	0	0	0	0	0
Asparagales	Orchidaceae	Epipactis	Epipactis helleborine	0	0	0	0	1	1	1	1	1	1	1	1
Asparagales	Orchidaceae	Epipactis	Epipactis palustris	0	0	0	0	1	1	1	1	1	1	1	1
Asparagales	Orchidaceae	Gymnadenia	Gymnadenia conopsea	0	0	0	0	1	1	1	1	1	1	1	1
Asparagales	Orchidaceae	Hammarbya	Hammarbya paludosa	1	1	1	1	1	1	1	1	1	1	1	1
Asparagales	Orchidaceae	Liparis	Liparis loeselii	1	1	1	1	1	1	1	1	1	1	1	1
Asparagales	Orchidaceae	Neottia	Neottia ovata	1	1	1	1	1	1	1	1	1	1	1	1
Asparagales	Orchidaceae	Ophrys	Ophrys insectifera	1	1	0	0	1	1	1	1	1	1	1	1
Asparagales	Orchidaceae	Orchis	Orchis mascula	1	1	0	0	1	1	1	1	1	1	1	1
Asparagales	Orchidaceae	Platanthera	Platanthera chlorantha	1	1	1	1	1	1	1	1	1	1	1	1
Asterales	Asteraceae	Achillea	Achillea millefolium	0	0	0	0	1	1	0	0	1	1	0	0
Asterales	Asteraceae	Achillea	Achillea ptarmica	0	0	0	0	1	0	0	0	1	1	0	0
Asterales	Asteraceae	Antennaria	Antennaria dioica	1	1	1	1	1	1	1	1	1	1	1	1
Asterales	Asteraceae	Arctium	Arctium lappa	0	0	0	0	0	0	0	0	0	0	0	0
Asterales	Asteraceae	Arctium	Arctium minus	0	0	0	0	0	0	0	0	0	0	0	0
Asterales	Asteraceae	Artemisia	Artemisia absinthium	0	0	0	0	1	1	1	1	1	1	1	1
Asterales	Asteraceae	Artemisia	Artemisia vulgaris	0	0	0	0	1	1	1	1	1	1	1	1
Asterales	Asteraceae	Aster	Aster linosyris	1	1	1	1	0	1	1	1	1	1	1	1
Asterales	Asteraceae	Aster	Aster tripolium	1	1	1	1	1	1	1	1	1	1	1	1
Asterales	Asteraceae	Bellis	Bellis perennis	1	1	1	1	1	1	1	1	1	1	1	1
Asterales	Asteraceae	Bidens	Bidens cernua	0	0	0	0	0	0	0	0	0	0	0	0
Asterales	Asteraceae	Bidens	Bidens tripartita	0	0	0	0	0	0	0	0	0	0	0	0
Asterales	Asteraceae	Carduus	Carduus crispus	0	0	0	0	0	0	0	0	0	0	0	0
Asterales	Asteraceae	Carduus	Carduus nutans	0	0	0	0	0	0	0	0	0	0	0	0
Asterales	Asteraceae	Carduus	Carduus tenuiflorus	0	0	0	0	0	0	0	0	0	0	0	0
Asterales	Asteraceae	Carlina	Carlina vulgaris	1	1	1	1	1	1	1	1	1	1	1	1
Asterales	Asteraceae	Centaurea	Centaurea cyanus	1	1	1	1	1	1	1	1	1	1	1	1
Asterales	Asteraceae	Centaurea	Centaurea nigra	0	0	0	0	1	1	0	0	1	1	0	0
Asterales	Asteraceae	Centaurea	Centaurea scabiosa	0	0	0	0	1	0	0	0	1	1	0	0
Asterales	Asteraceae	Chamaemelum	Chamaemelum nobile	1	1	1	1	1	1	1	1	1	1	1	1
Asterales	Asteraceae	Chrysanthemum	Chrysanthemum segetum	1	1	1	1	1	1	1	1	1	1	1	1
Asterales	Asteraceae	Cichorium	Cichorium intybus	1	1	1	1	1	1	1	1	1	1	1	1
Asterales	Asteraceae	Cirsium	Cirsium acaule	0	0	0	0	0	0	0	0	0	0	0	0
Asterales	Asteraceae	Cirsium	Cirsium arvense	0	0	0	0	0	0	0	0	0	0	0	0
Asterales	Asteraceae	Cirsium	Cirsium dissectum	0	0	0	0	0	0	0	0	0	1	0	0
Asterales	Asteraceae	Cirsium	Cirsium eriophorum	0	0	0	0	0	0	0	0	1	1	0	0
Asterales	Asteraceae	Cirsium	Cirsium heterophyllum	0	0	0	0	0	0	0	0	0	0	0	0
Asterales	Asteraceae	Cirsium	Cirsium palustre	0	0	0	0	0	0	0	0	0	0	0	0
Asterales	Asteraceae	Cirsium	Cirsium tuberosum	0	0	0	0	0	0	0	0	0	0	0	0
Asterales	Asteraceae	Cirsium	Cirsium vulgare	0	0	0	0	0	0	0	0	0	0	0	0
Asterales	Asteraceae	Crepis	Crepis biennis	1	1	1	1	1	1	1	1	1	1	1	1
Asterales	Asteraceae	Crepis	Crepis capillaris	1	1	1	1	1	1	1	1	1	1	1	1
Asterales	Asteraceae	Crepis	Crepis mollis	1	1	1	1	1	1	1	1	1	1	1	1
Asterales	Asteraceae	Crepis	Crepis paludosa	1	1	1	1	1	1	1	1	1	1	1	1
Asterales	Asteraceae	Erigeron	Erigeron acer	1	1	1	1	1	1	1	1	1	1	1	1
Asterales	Asteraceae	Eupatorium	Eupatorium cannabinum	1	1	1	1	1	1	1	1	1	1	1	1
Asterales	Asteraceae	Filago	Filago minima	1	1	1	1	1	1	1	1	1	1	1	1
Asterales	Asteraceae	Filago	Filago vulgaris	1	1	1	1	1	1	1	1	1	1	1	1
Asterales	Asteraceae	Gnaphalium	Gnaphalium uliginosum	1	1	1	1	1	1	1	1	1	1	1	1
Asterales	Asteraceae	Hieracium	Hieracium agg	1	1	1	1	0	1	1	1	1	1	1	1
Asterales	Asteraceae	Hypochaeris	Hypochaeris glabra	0	0	0	0	1	1	1	1	1	1	1	1
Asterales	Asteraceae	Hypochaeris	Hypochaeris radicata	0	0	0	0	1	1	1	1	1	1	1	1
Asterales	Asteraceae	Inula	Inula conyzae	1	1	1	1	1	1	1	1	1	1	1	1
Asterales	Asteraceae	Inula	Inula helenium	1	1	1	1	1	1	1	1	1	1	1	1
Asterales	Asteraceae	Lactuca	Lactuca serriola	0	0	0	0	0	0	0	0	0	0	0	0
Asterales	Asteraceae	Lactuca	Lactuca virosa	0	0	0	0	0	0	0	0	0	0	0	0
Asterales	Asteraceae	Lapsana	Lapsana communis	1	1	1	1	1	1	1	1	1	1	1	1
Asterales	Asteraceae	Leontodon	Leontodon autumnalis	1	1	1	1	1	1	1	1	1	1	1	1
Asterales	Asteraceae	Leontodon	Leontodon hispidus	1	1	1	1	1	1	1	1	1	1	1	1
Asterales	Asteraceae	Leontodon	Leontodon saxatilis	1	1	1	1	1	1	1	1	1	1	1	1
Asterales	Asteraceae	Leucanthemum	Leucanthemum vulgare	0	1	1	1	1	1	1	1	1	1	1	1
Asterales	Asteraceae	Matricaria	Matricaria recutita	1	1	1	1	1	1	1	1	1	1	1	1
Asterales	Asteraceae	Mycelis	Mycelis muralis	1	1	1	1	1	1	1	1	1	1	1	1
Asterales	Asteraceae	Onopordum	Onopordum acanthium	0	0	0	0	1	1	1	1	1	1	1	1
Asterales	Asteraceae	Petasites	Petasites hybridus	1	1	1	1	1	1	1	1	1	1	1	1
Asterales	Asteraceae	Picris	Picris echioides	1	1	1	1	1	1	1	1	1	1	1	1
Asterales	Asteraceae	Picris	Picris hieracioides	1	1	1	1	1	1	1	1	1	1	1	1
Asterales	Asteraceae	Pilosella	Pilosella officinarum	0	0	0	0	1	1	1	1	1	1	1	1
Asterales	Asteraceae	Pilosella	Pilosella peleteriana	0	0	0	0	1	1	0	0	1	1	0	0
Asterales	Asteraceae	Pulicaria	Pulicaria dysenterica	1	1	1	1	1	1	1	1	1	1	1	1
Asterales	Asteraceae	Senecio	Senecio jacobaea	0	0	0	0	0	0	0	0	0	0	0	0
Asterales	Asteraceae	Senecio	Senecio vulgaris	0	0	0	0	0	0	0	0	0	0	0	0
Asterales	Asteraceae	Serratula	Serratula tinctoria	1	1	1	1	1	1	1	1	1	1	1	1
Asterales	Asteraceae	Solidago	Solidago virgaurea	1	1	1	1	1	1	1	1	1	1	1	1
Asterales	Asteraceae	Sonchus	Sonchus arvensis	0	0	0	0	1	1	1	1	1	1	1	1
Asterales	Asteraceae	Sonchus	Sonchus asper	0	0	0	0	0	0	0	0	0	0	0	0
Asterales	Asteraceae	Sonchus	Sonchus oleraceus	0	0	0	0	0	0	0	0	0	0	0	0
Asterales	Asteraceae	Tanacetum	Tanacetum parthenium	1	1	1	1	1	1	1	1	1	1	1	1
Asterales	Asteraceae	Tanacetum	Tanacetum vulgare	1	1	1	1	1	1	1	1	1	1	1	1
Asterales	Asteraceae	Taraxacum	Taraxacum agg	1	1	1	1	1	1	1	1	1	1	1	1
Asterales	Asteraceae	Tragopogon	Tragopogon pratensis	1	1	1	1	1	1	1	1	1	1	1	1
Asterales	Asteraceae	Tripleurospermum	Tripleurospermum inodorum	1	1	1	1	1	1	1	1	1	1	1	1
Asterales	Asteraceae	Tussilago	Tussilago farfara	1	1	1	1	1	1	1	1	1	1	1	1
Asterales	Campanulaceae	Campanula	Campanula glomerata	1	1	1	1	1	1	1	1	1	1	1	1
Asterales	Campanulaceae	Campanula	Campanula latifolia	0	0	0	0	1	1	1	1	1	1	1	1
Asterales	Campanulaceae	Campanula	Campanula patula	1	1	1	1	1	1	1	1	1	1	1	1
Asterales	Campanulaceae	Campanula	Campanula trachelium	0	0	0	0	1	1	1	1	1	1	1	1
Asterales	Campanulaceae	Jasione	Jasione montana	1	1	1	1	1	1	1	1	1	1	1	1
Asterales	Campanulaceae	Wahlenbergia	Wahlenbergia hederacea	1	1	1	1	1	1	1	1	1	1	1	1
Asterales	Menyanthaceae	Menyanthes	Menyanthes trifoliata	1	1	1	1	1	1	1	1	1	1	1	1
Boraginales	Boraginaceae	Cynoglossum	Cynoglossum officinale	1	1	1	1	1	1	1	1	1	1	1	1
Boraginales	Boraginaceae	Echium	Echium vulgare	1	1	1	1	1	1	1	1	1	1	1	1
Boraginales	Boraginaceae	Lithospermum	Lithospermum arvense	1	1	1	1	1	1	1	1	1	1	1	1
Boraginales	Boraginaceae	Lithospermum	Lithospermum officinale	1	1	1	1	1	1	1	1	1	1	1	1
Boraginales	Boraginaceae	Lithospermum	Lithospermum purpureocaeruleum	1	1	1	1	1	1	1	1	1	1	1	1
Boraginales	Boraginaceae	Mertensia	Mertensia maritima	1	1	1	1	1	1	1	1	1	1	1	1
Boraginales	Boraginaceae	Myosotis	Myosotis arvensis	0	0	0	0	1	1	1	1	1	1	1	1
Boraginales	Boraginaceae	Myosotis	Myosotis discolor	1	1	1	1	1	1	1	1	1	1	1	1
Boraginales	Boraginaceae	Myosotis	Myosotis laxa	1	0	0	0	1	1	1	0	1	1	1	0
Boraginales	Boraginaceae	Myosotis	Myosotis ramosissima	1	1	1	1	1	1	1	1	1	1	1	1
Boraginales	Boraginaceae	Myosotis	Myosotis scorpioides	1	0	0	0	1	0	1	0	1	1	1	0
Boraginales	Boraginaceae	Myosotis	Myosotis secunda	1	1	1	1	1	1	1	1	1	1	1	1
Boraginales	Boraginaceae	Myosotis	Myosotis sylvatica	0	0	0	0	1	1	1	1	1	1	1	1
Boraginales	Boraginaceae	Symphytum	Symphytum officinale	1	1	1	1	1	1	1	1	1	1	1	1
Brassicales	Brassicaceae	Alliaria	Alliaria petiolata	1	1	1	1	1	1	1	1	1	1	1	1
Brassicales	Brassicaceae	Arabidopsis	Arabidopsis thaliana	1	1	1	1	1	1	1	1	1	1	1	1
Brassicales	Brassicaceae	Arabis	Arabis hirsuta	1	1	1	1	1	1	1	1	1	1	1	1
Brassicales	Brassicaceae	Armoracia	Armoracia rusticana	1	1	1	1	1	1	1	1	1	1	1	1
Brassicales	Brassicaceae	Barbarea	Barbarea vulgaris	1	1	1	1	1	1	1	1	1	1	1	1
Brassicales	Brassicaceae	Brassica	Brassica nigra	1	0	0	0	1	1	1	1	1	1	1	1
Brassicales	Brassicaceae	Brassica	Brassica oleracea	1	1	1	1	1	1	1	1	1	1	1	1
Brassicales	Brassicaceae	Brassica	Brassica rapa	1	1	1	1	1	1	1	1	1	1	1	1
Brassicales	Brassicaceae	Cakile	Cakile maritima	1	1	1	1	1	1	1	1	1	1	1	1
Brassicales	Brassicaceae	Capsella	Capsella bursa	1	1	1	1	1	1	1	1	1	1	1	1
Brassicales	Brassicaceae	Cardamine	Cardamine flexuosa	0	0	0	0	1	1	1	1	1	1	1	1
Brassicales	Brassicaceae	Cardamine	Cardamine hirsuta	1	1	1	1	1	1	1	1	1	1	1	1
Brassicales	Brassicaceae	Cardamine	Cardamine pratensis	1	1	1	1	1	1	1	1	1	1	1	1
Brassicales	Brassicaceae	Cochlearia	Cochlearia anglica	0	0	0	0	0	0	0	0	0	0	0	0
Brassicales	Brassicaceae	Cochlearia	Cochlearia danica	0	0	0	0	0	0	0	0	0	0	0	0
Brassicales	Brassicaceae	Coincya	Coincya monensis	1	0	0	0	1	1	1	1	1	1	1	1
Brassicales	Brassicaceae	Crambe	Crambe maritima	1	1	1	1	1	1	1	1	1	1	1	1
Brassicales	Brassicaceae	Descurainia	Descurainia sophia	1	1	1	1	1	1	1	1	1	1	1	1
Brassicales	Brassicaceae	Diplotaxis	Diplotaxis tenuifolia	1	1	1	1	1	1	1	1	1	1	1	1
Brassicales	Brassicaceae	Draba	Draba aizoides	1	1	1	1	1	1	1	1	1	1	1	1
Brassicales	Brassicaceae	Draba	Draba incana	1	1	0	0	1	1	1	1	1	1	1	1
Brassicales	Brassicaceae	Erophila	Erophila glabrescens	0	0	0	0	0	0	0	0	0	0	0	0
Brassicales	Brassicaceae	Erophila	Erophila majuscula	0	0	0	0	0	0	0	0	0	1	0	0
Brassicales	Brassicaceae	Erophila	Erophila verna	0	0	0	0	0	0	0	0	0	0	0	0
Brassicales	Brassicaceae	Erysimum	Erysimum cheiranthoides	0	0	0	0	1	1	1	1	1	1	1	1
Brassicales	Brassicaceae	Erysimum	Erysimum cheiri	0	0	0	0	1	1	1	1	1	1	1	1
Brassicales	Brassicaceae	Hornungia	Hornungia petraea	1	1	1	1	1	1	1	1	1	1	1	1
Brassicales	Brassicaceae	Lepidium	Lepidium campestre	0	0	0	0	1	1	1	1	1	1	1	1
Brassicales	Brassicaceae	Lepidium	Lepidium coronopus	0	0	0	0	1	1	1	1	1	1	1	1
Brassicales	Brassicaceae	Lepidium	Lepidium heterophyllum	0	0	0	0	1	1	1	1	1	1	1	1
Brassicales	Brassicaceae	Lepidium	Lepidium latifolium	0	0	0	0	1	1	1	1	1	1	1	1
Brassicales	Brassicaceae	Lepidium	Lepidium ruderale	1	1	1	1	1	1	1	1	1	1	1	1
Brassicales	Brassicaceae	Matthiola	Matthiola sinuata	1	1	1	1	1	1	1	1	1	1	1	1
Brassicales	Brassicaceae	Nasturtium	Nasturtium microphyllum	0	0	0	0	0	0	0	0	0	0	0	0
Brassicales	Brassicaceae	Nasturtium	Nasturtium officinale	0	0	0	0	0	0	0	0	0	0	0	0
Brassicales	Brassicaceae	Raphanus	Raphanus raphanistrum	1	1	1	1	1	1	1	1	1	1	1	1
Brassicales	Brassicaceae	Rorippa	Rorippa amphibia	0	0	0	0	0	0	0	0	0	0	0	0
Brassicales	Brassicaceae	Rorippa	Rorippa islandica	1	1	1	1	1	1	1	1	1	1	1	1
Brassicales	Brassicaceae	Rorippa	Rorippa palustris	0	0	0	0	1	1	0	0	1	1	0	0
Brassicales	Brassicaceae	Rorippa	Rorippa sylvestris	0	0	0	0	0	0	0	0	0	0	0	0
Brassicales	Brassicaceae	Sinapis	Sinapis alba	1	0	0	0	1	1	1	1	1	1	1	1
Brassicales	Brassicaceae	Sinapis	Sinapis arvensis	1	0	0	0	1	1	1	1	1	1	1	1
Brassicales	Brassicaceae	Sisymbrium	Sisymbrium officinale	1	1	1	1	1	1	1	1	1	1	1	1
Brassicales	Brassicaceae	Thlaspi	Thlaspi arvense	1	1	1	1	1	1	1	1	1	1	1	1
Brassicales	Brassicaceae	Thlaspi	Thlaspi caerulescens	1	1	1	1	1	1	1	1	1	1	1	1
Brassicales	Resedaceae	Reseda	Reseda lutea	1	1	1	1	1	1	1	1	1	1	1	1
Brassicales	Resedaceae	Reseda	Reseda luteola	1	1	1	1	1	1	1	1	1	1	1	1
Caryophyllales	Amaranthaceae	Atriplex	Atriplex littoralis	0	0	0	0	0	0	0	0	0	0	0	0
Caryophyllales	Amaranthaceae	Atriplex	Atriplex patula	0	0	0	0	0	0	0	0	0	0	0	0
Caryophyllales	Amaranthaceae	Atriplex	Atriplex portulacoides	1	1	1	1	1	1	1	1	1	1	1	1
Caryophyllales	Amaranthaceae	Atriplex	Atriplex prostrata	0	0	0	0	0	0	0	0	0	0	0	0
Caryophyllales	Amaranthaceae	Beta	Beta vulgaris	1	1	1	1	1	1	1	1	1	1	1	1
Caryophyllales	Amaranthaceae	Chenopodium	Chenopodium album	0	0	0	0	1	1	1	1	1	1	1	1
Caryophyllales	Amaranthaceae	Chenopodium	Chenopodium ficifolium	0	0	0	0	1	1	1	1	1	1	1	1
Caryophyllales	Amaranthaceae	Chenopodium	Chenopodium polyspermum	1	1	1	1	1	1	1	1	1	1	1	1
Caryophyllales	Amaranthaceae	Chenopodium	Chenopodium rubrum	1	1	1	1	1	1	1	1	1	1	1	1
Caryophyllales	Amaranthaceae	Chenopodium	Chenopodium urbicum	1	1	1	1	1	1	1	1	1	1	1	1
Caryophyllales	Amaranthaceae	Salicornia	Salicornia dolichostachya	0	0	0	0	0	0	0	0	0	0	0	0
Caryophyllales	Amaranthaceae	Salsola	Salsola kali	1	1	1	1	1	1	1	1	1	1	1	1
Caryophyllales	Amaranthaceae	Suaeda	Suaeda maritima	1	1	1	1	1	1	1	1	1	1	1	1
Caryophyllales	Caryophyllaceae	Agrostemma	Agrostemma githago	1	1	1	1	1	1	1	1	1	1	1	1
Caryophyllales	Caryophyllaceae	Arenaria	Arenaria serpyllifolia	1	1	1	1	1	1	1	1	1	1	1	1
Caryophyllales	Caryophyllaceae	Cerastium	Cerastium alpinum	0	0	0	0	0	0	0	0	0	0	0	0
Caryophyllales	Caryophyllaceae	Cerastium	Cerastium arcticum	0	0	0	0	0	0	0	0	0	0	0	0
Caryophyllales	Caryophyllaceae	Cerastium	Cerastium diffusum	0	0	0	0	0	0	0	0	0	0	0	0
Caryophyllales	Caryophyllaceae	Cerastium	Cerastium fontanum	1	0	0	0	1	1	1	1	1	1	1	1
Caryophyllales	Caryophyllaceae	Cerastium	Cerastium glomeratum	1	1	1	1	1	1	1	1	1	1	1	1
Caryophyllales	Caryophyllaceae	Cerastium	Cerastium semidecandrum	1	1	1	1	1	1	1	1	1	1	1	1
Caryophyllales	Caryophyllaceae	Dianthus	Dianthus deltoides	0	0	0	0	1	1	1	1	1	1	1	1
Caryophyllales	Caryophyllaceae	Honckenya	Honckenya peploides	1	1	1	1	1	1	1	1	1	1	1	1
Caryophyllales	Caryophyllaceae	Minuartia	Minuartia hybrida	0	0	0	0	1	1	1	1	1	1	1	1
Caryophyllales	Caryophyllaceae	Minuartia	Minuartia verna	0	0	0	0	1	1	1	1	1	1	1	1
Caryophyllales	Caryophyllaceae	Moehringia	Moehringia trinervia	1	1	1	1	1	1	1	1	1	1	1	1
Caryophyllales	Caryophyllaceae	Moenchia	Moenchia erecta	1	1	1	1	1	1	1	1	1	1	1	1
Caryophyllales	Caryophyllaceae	Myosoton	Myosoton aquaticum	1	1	1	1	1	1	1	1	1	1	1	1
Caryophyllales	Caryophyllaceae	Sagina	Sagina apetala	0	0	0	0	1	1	1	1	1	1	1	1
Caryophyllales	Caryophyllaceae	Sagina	Sagina maritima	0	0	0	0	1	1	1	1	1	1	1	1
Caryophyllales	Caryophyllaceae	Sagina	Sagina nodosa	0	0	0	0	1	1	1	1	1	1	1	1
Caryophyllales	Caryophyllaceae	Sagina	Sagina procumbens	0	0	0	0	1	1	1	1	1	1	1	1
Caryophyllales	Caryophyllaceae	Sagina	Sagina subulata	0	0	0	0	1	1	1	1	1	1	1	1
Caryophyllales	Caryophyllaceae	Saponaria	Saponaria officinalis	1	1	1	1	1	1	1	1	1	1	1	1
Caryophyllales	Caryophyllaceae	Scleranthus	Scleranthus perennis	0	0	0	0	1	1	1	1	1	1	1	1
Caryophyllales	Caryophyllaceae	Silene	Silene dioica	0	0	0	0	0	0	0	0	0	0	0	0
Caryophyllales	Caryophyllaceae	Silene	Silene flos	1	1	1	1	1	1	1	1	1	1	1	1
Caryophyllales	Caryophyllaceae	Silene	Silene gallica	1	1	1	1	1	1	1	1	1	1	1	1
Caryophyllales	Caryophyllaceae	Silene	Silene latifolia	0	0	0	0	1	0	0	0	0	0	0	0
Caryophyllales	Caryophyllaceae	Silene	Silene noctiflora	1	1	1	1	1	1	1	1	1	1	1	1
Caryophyllales	Caryophyllaceae	Silene	Silene uniflora	0	0	0	0	0	1	1	1	0	1	0	0
Caryophyllales	Caryophyllaceae	Silene	Silene viscaria	1	1	1	1	1	1	1	1	1	1	1	1
Caryophyllales	Caryophyllaceae	Silene	Silene vulgaris	1	0	0	0	1	1	1	1	1	1	0	0
Caryophyllales	Caryophyllaceae	Spergula	Spergula arvensis	1	1	1	1	1	1	1	1	1	1	1	1
Caryophyllales	Caryophyllaceae	Spergularia	Spergularia marina	1	1	1	1	1	1	1	1	1	1	1	1
Caryophyllales	Caryophyllaceae	Spergularia	Spergularia media	0	0	0	0	0	0	0	0	0	0	0	0
Caryophyllales	Caryophyllaceae	Spergularia	Spergularia rubra	1	1	1	1	1	1	1	1	1	1	1	1
Caryophyllales	Caryophyllaceae	Spergularia	Spergularia rupicola	0	0	0	0	0	0	0	0	0	0	0	0
Caryophyllales	Caryophyllaceae	Stellaria	Stellaria graminea	1	1	1	1	1	1	1	1	1	1	1	1
Caryophyllales	Caryophyllaceae	Stellaria	Stellaria holostea	1	1	1	1	1	1	1	1	1	1	1	1
Caryophyllales	Caryophyllaceae	Stellaria	Stellaria media	0	0	0	0	0	0	0	0	0	0	0	0
Caryophyllales	Caryophyllaceae	Stellaria	Stellaria neglecta	0	0	0	0	1	1	1	1	1	1	1	1
Caryophyllales	Caryophyllaceae	Stellaria	Stellaria pallida	0	0	0	0	0	0	0	0	0	0	0	0
Caryophyllales	Caryophyllaceae	Stellaria	Stellaria uliginosa	1	1	1	1	1	1	1	1	1	1	1	1
Caryophyllales	Droseraceae	Drosera	Drosera rotundifolia	1	1	1	1	1	1	1	1	1	1	1	1
Caryophyllales	Montiaceae	Montia	Montia fontana	1	1	1	1	1	1	1	1	1	1	1	1
Caryophyllales	Plumbaginaceae	Armeria	Armeria maritima	1	1	1	1	1	1	1	1	1	1	1	1
Caryophyllales	Polygonaceae	Fallopia	Fallopia convolvulus	1	1	1	1	1	1	1	1	1	1	1	1
Caryophyllales	Polygonaceae	Persicaria	Persicaria bistorta	1	1	1	1	1	1	1	1	1	1	1	1
Caryophyllales	Polygonaceae	Persicaria	Persicaria hydropiper	1	1	1	1	1	1	1	1	1	1	1	1
Caryophyllales	Polygonaceae	Persicaria	Persicaria lapathifolia	1	1	1	1	1	1	1	1	1	1	1	1
Caryophyllales	Polygonaceae	Persicaria	Persicaria maculosa	1	0	0	0	1	1	1	1	1	1	1	1
Caryophyllales	Polygonaceae	Persicaria	Persicaria minor	0	0	0	0	0	0	0	0	0	0	0	0
Caryophyllales	Polygonaceae	Persicaria	Persicaria mitis	0	0	0	0	0	0	0	0	0	0	0	0
Caryophyllales	Polygonaceae	Persicaria	Persicaria vivipara	1	1	1	1	1	1	1	1	1	1	1	1
Caryophyllales	Polygonaceae	Polygonum	Polygonum arenastrum	0	0	0	0	0	0	0	0	0	0	0	0
Caryophyllales	Polygonaceae	Polygonum	Polygonum aviculare	0	0	0	0	0	0	0	0	0	0	0	0
Caryophyllales	Polygonaceae	Rumex	Rumex acetosa	1	1	1	1	1	1	1	1	1	1	1	1
Caryophyllales	Polygonaceae	Rumex	Rumex acetosella	1	1	1	1	1	1	1	1	1	1	1	1
Caryophyllales	Polygonaceae	Rumex	Rumex conglomeratus	0	0	0	0	0	0	0	0	0	0	0	0
Caryophyllales	Polygonaceae	Rumex	Rumex crispus	0	0	0	0	0	0	0	0	0	0	0	0
Caryophyllales	Polygonaceae	Rumex	Rumex hydrolapathum	1	1	1	1	1	1	0	0	1	1	0	0
Caryophyllales	Polygonaceae	Rumex	Rumex maritimus	0	0	0	0	1	0	0	0	1	0	0	0
Caryophyllales	Polygonaceae	Rumex	Rumex obtusifolius	0	0	0	0	0	0	0	0	0	0	0	0
Caryophyllales	Polygonaceae	Rumex	Rumex palustris	1	0	0	0	1	0	0	0	1	0	0	0
Caryophyllales	Polygonaceae	Rumex	Rumex sanguineus	0	0	0	0	0	0	0	0	0	0	0	0
Celastrales	Celastraceae	Euonymus	Euonymus europaeus	1	1	1	1	1	1	1	1	1	1	1	1
Celastrales	Parnassiaceae	Parnassia	Parnassia palustris	1	1	1	1	1	1	1	1	1	1	1	1
Ceratophyllales	Ceratopyllaceae	Ceratophyllum	Ceratophyllum demersum	1	1	1	1	1	1	1	1	1	1	1	1
Ceratophyllales	Ceratopyllaceae	Ceratophyllum	Ceratophyllum submersum	1	1	1	1	1	1	1	1	1	1	1	1
Cornales	Cornaceae	Cornus	Cornus sanguinea	1	1	1	1	1	1	1	1	1	1	1	1
Cucurbitales	Cucurbitaceae	Bryonia	Bryonia dioica	1	1	1	1	1	1	1	1	1	1	1	1
Dioscoreales	Dioscoreaceae	Tamus	Tamus communis	1	1	1	1	1	1	1	1	1	1	1	1
Dioscoreales	Nartheciaceae	Narthecium	Narthecium ossifragum	1	1	1	1	1	1	1	1	1	1	1	1
Dipsacales	Adoxaceae	Adoxa	Adoxa moschatellina	1	1	1	1	1	1	1	1	1	1	1	1
Dipsacales	Caprifoliaceae	Lonicera	Lonicera periclymenum	1	1	1	1	1	1	1	1	1	1	1	1
Dipsacales	Caprifoliaceae	Sambucus	Sambucus ebulus	1	1	1	1	1	1	1	1	1	1	1	1
Dipsacales	Caprifoliaceae	Sambucus	Sambucus nigra	1	1	1	1	1	1	1	1	1	1	1	1
Dipsacales	Caprifoliaceae	Viburnum	Viburnum lantana	1	1	1	1	1	1	1	1	1	1	1	1
Dipsacales	Caprifoliaceae	Viburnum	Viburnum opulus	1	1	1	1	1	1	1	1	1	1	1	1
Dipsacales	Dipsacaceae	Dipsacus	Dipsacus fullonum	1	1	1	1	1	1	1	1	1	1	1	1
Dipsacales	Dipsacaceae	Dipsacus	Dipsacus pilosus	1	1	1	1	1	1	1	1	1	1	1	1
Dipsacales	Dipsacaceae	Knautia	Knautia arvensis	0	1	1	1	1	1	1	1	1	1	1	1
Dipsacales	Dipsacaceae	Scabiosa	Scabiosa columbaria	1	1	1	1	1	1	1	1	1	1	1	1
Dipsacales	Dipsacaceae	Succisa	Succisa pratensis	1	1	1	1	1	1	1	1	1	1	1	1
Dipsacales	Valerianaceae	Valeriana	Valeriana dioica	1	1	1	1	1	1	1	1	1	1	1	1
Dipsacales	Valerianaceae	Valeriana	Valeriana officinalis	1	1	1	1	1	1	1	1	1	1	1	1
Dipsacales	Valerianaceae	Valerianella	Valerianella carinata	0	0	0	0	0	0	0	0	0	0	0	0
Dipsacales	Valerianaceae	Valerianella	Valerianella dentata	0	0	0	0	0	0	0	0	0	0	0	0
Dipsacales	Valerianaceae	Valerianella	Valerianella locusta	0	0	0	0	0	0	0	0	0	0	0	0
Ericales	Ericaceae	Andromeda	Andromeda polifolia	1	1	1	1	1	1	1	1	1	1	1	1
Ericales	Ericaceae	Calluna	Calluna vulgaris	1	1	1	1	1	1	1	1	1	1	1	1
Ericales	Ericaceae	Empetrum	Empetrum nigrum	1	1	1	1	1	1	1	1	1	1	1	1
Ericales	Ericaceae	Erica	Erica cinerea	1	1	1	1	1	1	1	1	1	1	1	1
Ericales	Ericaceae	Erica	Erica tetralix	1	1	1	1	1	1	1	1	1	1	1	1
Ericales	Ericaceae	Orthilia	Orthilia secunda	1	1	1	1	1	1	1	1	1	1	1	1
Ericales	Ericaceae	Pyrola	Pyrola minor	1	1	1	1	1	1	1	1	1	1	1	1
Ericales	Ericaceae	Pyrola	Pyrola rotundifolia	1	1	1	1	1	1	1	1	1	1	1	1
Ericales	Ericaceae	Vaccinium	Vaccinium myrtillus	1	1	1	1	1	1	1	1	1	1	1	1
Ericales	Ericaceae	Vaccinium	Vaccinium oxycoccos	1	1	1	1	1	1	1	1	1	1	1	1
Ericales	Primulaceae	Anagallis	Anagallis arvensis	1	1	1	1	1	1	1	1	1	1	1	1
Ericales	Primulaceae	Anagallis	Anagallis tenella	1	1	1	1	1	1	1	1	1	1	1	1
Ericales	Primulaceae	Lysimachia	Lysimachia nemorum	1	1	1	1	1	1	1	1	1	1	1	1
Ericales	Primulaceae	Lysimachia	Lysimachia nummularia	1	1	1	1	1	1	1	1	1	1	1	1
Ericales	Primulaceae	Primula	Primula veris	1	1	1	1	1	1	1	1	1	1	1	1
Ericales	Primulaceae	Primula	Primula vulgaris	1	1	1	1	1	1	1	1	1	1	1	1
Ericales	Primulaceae	Samolus	Samolus valerandi	1	1	1	1	1	1	1	1	1	1	1	1
Fabales	Fabaceae	Anthyllis	Anthyllis vulneraria	1	1	1	1	1	1	1	1	1	1	1	1
Fabales	Fabaceae	Astragalus	Astragalus glycyphyllos	1	1	1	1	1	1	1	1	1	1	1	1
Fabales	Fabaceae	Cytisus	Cytisus scoparius	1	1	1	1	1	1	1	1	1	1	1	1
Fabales	Fabaceae	Genista	Genista anglica	1	1	1	1	0	1	1	1	1	1	1	1
Fabales	Fabaceae	Genista	Genista pilosa	1	1	1	1	1	1	1	1	1	1	1	1
Fabales	Fabaceae	Genista	Genista tinctoria	1	1	1	1	1	1	1	1	1	1	1	1
Fabales	Fabaceae	Lathyrus	Lathyrus japonicus	1	1	1	1	1	1	1	1	1	1	1	1
Fabales	Fabaceae	Lathyrus	Lathyrus linifolius	1	1	1	1	1	1	1	1	1	1	1	1
Fabales	Fabaceae	Lathyrus	Lathyrus palustris	1	1	1	1	1	1	1	1	1	1	1	1
Fabales	Fabaceae	Lathyrus	Lathyrus pratensis	1	1	1	1	1	1	1	1	1	1	1	1
Fabales	Fabaceae	Lotus	Lotus corniculatus	0	0	0	0	0	0	0	0	0	0	0	0
Fabales	Fabaceae	Lotus	Lotus glaber	0	0	0	0	1	0	0	0	0	0	0	0
Fabales	Fabaceae	Lotus	Lotus pedunculatus	0	0	0	0	0	0	0	0	0	0	0	0
Fabales	Fabaceae	Medicago	Medicago arabica	1	1	0	0	1	1	1	1	1	1	1	1
Fabales	Fabaceae	Medicago	Medicago lupulina	1	1	1	1	1	1	1	1	1	1	1	1
Fabales	Fabaceae	Melilotus	Melilotus altissimus	1	1	1	1	1	1	1	1	1	1	1	1
Fabales	Fabaceae	Ononis	Ononis repens	1	1	1	1	1	1	1	1	1	1	1	1
Fabales	Fabaceae	Ornithopus	Ornithopus perpusillus	1	1	1	1	1	1	1	1	1	1	1	1
Fabales	Fabaceae	Trifolium	Trifolium arvense	1	1	1	1	1	1	1	1	1	1	1	1
Fabales	Fabaceae	Trifolium	Trifolium campestre	0	0	0	0	0	0	0	0	0	0	0	0
Fabales	Fabaceae	Trifolium	Trifolium dubium	0	0	0	0	0	0	0	0	0	0	0	0
Fabales	Fabaceae	Trifolium	Trifolium fragiferum	1	1	1	1	1	1	1	1	1	1	1	1
Fabales	Fabaceae	Trifolium	Trifolium medium	1	1	1	1	1	1	1	1	1	1	1	1
Fabales	Fabaceae	Trifolium	Trifolium micranthum	1	1	1	1	0	1	1	1	1	1	1	1
Fabales	Fabaceae	Trifolium	Trifolium occidentale	1	1	1	1	1	1	1	1	1	1	1	1
Fabales	Fabaceae	Trifolium	Trifolium ornithopodioides	1	1	1	1	1	1	1	1	1	1	1	1
Fabales	Fabaceae	Trifolium	Trifolium pratense	1	1	1	1	1	1	1	1	1	1	1	1
Fabales	Fabaceae	Trifolium	Trifolium repens	1	1	1	1	1	1	1	1	1	1	1	1
Fabales	Fabaceae	Trifolium	Trifolium scabrum	1	1	1	1	1	1	1	1	1	1	1	1
Fabales	Fabaceae	Trifolium	Trifolium squamosum	1	1	1	1	1	1	1	1	1	1	1	1
Fabales	Fabaceae	Trifolium	Trifolium striatum	1	1	1	1	1	1	1	1	1	1	1	1
Fabales	Fabaceae	Trifolium	Trifolium strictum	1	1	1	1	1	1	1	1	1	1	1	1
Fabales	Fabaceae	Trifolium	Trifolium suffocatum	1	1	1	1	1	1	1	1	1	1	1	1
Fabales	Fabaceae	Ulex	Ulex europaeus	0	0	0	0	0	0	0	0	0	0	0	0
Fabales	Fabaceae	Ulex	Ulex gallii	0	0	0	0	0	0	0	0	0	0	0	0
Fabales	Fabaceae	Vicia	Vicia bithynica	1	1	1	1	1	1	1	1	1	1	1	1
Fabales	Fabaceae	Vicia	Vicia cracca	1	1	1	1	1	1	1	1	1	1	1	1
Fabales	Fabaceae	Vicia	Vicia hirsuta	1	1	1	1	1	1	1	1	1	1	1	1
Fabales	Fabaceae	Vicia	Vicia lathyroides	1	1	1	1	1	1	1	1	1	1	1	1
Fabales	Fabaceae	Vicia	Vicia orobus	1	1	1	1	1	1	1	1	1	1	1	1
Fabales	Fabaceae	Vicia	Vicia sepium	1	1	1	1	1	1	1	1	1	1	1	1
Fabales	Fabaceae	Vicia	Vicia sylvatica	1	1	1	1	1	1	1	1	1	1	1	1
Fabales	Fabaceae	Vicia	Vicia tetrasperma	1	1	1	1	1	1	1	1	1	1	1	1
Fagales	Betulaceae	Alnus	Alnus glutinosa	1	1	1	1	1	1	1	1	1	1	1	1
Fagales	Betulaceae	Betula	Betula pendula	0	0	0	0	0	0	0	0	0	0	0	0
Fagales	Betulaceae	Betula	Betula pubescens	0	0	0	0	0	0	0	0	0	0	0	0
Fagales	Betulaceae	Carpinus	Carpinus betulus	1	1	1	1	1	1	1	1	1	1	1	1
Fagales	Betulaceae	Corylus	Corylus avellana	1	1	1	1	1	1	1	1	1	1	1	1
Fagales	Fagaceae	Castanea	Castanea sativa	1	1	1	1	1	1	1	1	1	1	1	1
Fagales	Fagaceae	Fagus	Fagus sylvatica	1	1	1	1	1	1	1	1	1	1	1	1
Fagales	Fagaceae	Quercus	Quercus petraea	0	0	0	0	1	0	0	0	0	0	0	0
Fagales	Fagaceae	Quercus	Quercus robur	0	0	0	0	1	0	0	0	0	0	0	0
Fagales	Myricaceae	Myrica	Myrica gale	1	1	1	1	1	1	1	1	1	1	1	1
Gentianales	Apocynaceae	Vinca	Vinca minor	1	1	1	1	1	1	1	1	1	1	1	1
Gentianales	Gentianaceae	Centaurium	Centaurium erythraea	1	1	1	1	1	1	1	1	1	1	1	1
Gentianales	Gentianaceae	Gentianella	Gentianella amarella	0	0	0	0	0	0	0	0	0	0	0	0
Gentianales	Gentianaceae	Gentianella	Gentianella anglica	0	0	0	0	0	0	0	0	0	0	0	0
Gentianales	Gentianaceae	Gentianella	Gentianella campestris	1	1	1	1	0	0	0	0	1	1	1	1
Gentianales	Gentianaceae	Gentianella	Gentianella uliginosa	0	0	0	0	0	0	0	0	0	0	0	0
Gentianales	Rubiaceae	Cruciata	Cruciata laevipes	1	1	1	1	1	1	1	1	1	1	1	1
Gentianales	Rubiaceae	Galium	Galium aparine	1	1	1	1	1	1	1	1	1	1	1	1
Gentianales	Rubiaceae	Galium	Galium mollugo	0	0	0	0	1	1	0	1	1	1	0	1
Gentianales	Rubiaceae	Galium	Galium odoratum	1	1	1	1	1	1	1	1	1	1	1	1
Gentianales	Rubiaceae	Galium	Galium saxatile	0	0	0	0	1	1	1	1	1	1	1	1
Gentianales	Rubiaceae	Galium	Galium sterneri	0	0	0	0	1	1	1	1	1	1	1	1
Gentianales	Rubiaceae	Galium	Galium uliginosum	1	1	1	1	1	1	1	1	1	1	1	1
Gentianales	Rubiaceae	Galium	Galium verum	0	0	0	0	1	1	0	1	1	1	0	1
Gentianales	Rubiaceae	Rubia	Rubia peregrina	1	1	1	1	1	1	1	1	1	1	1	1
Geraniales	Geraniaceae	Geranium	Geranium dissectum	1	1	1	1	1	1	1	1	1	1	1	1
Geraniales	Geraniaceae	Geranium	Geranium lucidum	1	1	1	1	1	1	1	1	1	1	1	1
Geraniales	Geraniaceae	Geranium	Geranium molle	0	0	0	0	1	0	0	0	1	0	0	0
Geraniales	Geraniaceae	Geranium	Geranium pratense	1	1	1	1	1	1	1	1	1	1	1	1
Geraniales	Geraniaceae	Geranium	Geranium robertianum	0	0	0	0	1	1	1	1	1	1	1	1
Geraniales	Geraniaceae	Geranium	Geranium sanguineum	1	0	0	0	1	1	1	1	1	1	1	1
Lamiales	Lamiaceae	Ajuga	Ajuga reptans	1	1	1	1	1	1	1	1	1	1	1	1
Lamiales	Lamiaceae	Ballota	Ballota nigra	1	1	1	1	1	1	1	1	1	1	1	1
Lamiales	Lamiaceae	Clinopodium	Clinopodium acinos	1	1	1	1	1	1	1	1	1	1	1	1
Lamiales	Lamiaceae	Clinopodium	Clinopodium vulgare	1	1	1	1	1	1	1	1	1	1	1	1
Lamiales	Lamiaceae	Galeopsis	Galeopsis angustifolia	0	0	0	0	1	1	1	1	1	1	1	1
Lamiales	Lamiaceae	Galeopsis	Galeopsis bifida	1	1	1	1	1	1	1	1	1	1	1	1
Lamiales	Lamiaceae	Galeopsis	Galeopsis speciosa	1	1	1	1	1	1	1	1	1	1	1	1
Lamiales	Lamiaceae	Galeopsis	Galeopsis tetrahit	1	1	1	1	1	1	1	1	1	1	1	1
Lamiales	Lamiaceae	Glechoma	Glechoma hederacea	1	1	1	1	1	1	1	1	1	1	1	1
Lamiales	Lamiaceae	Lamiastrum	Lamiastrum galeobdolon	1	1	1	1	0	1	1	1	1	1	1	1
Lamiales	Lamiaceae	Lamium	Lamium album	1	1	1	1	1	1	1	1	1	1	1	1
Lamiales	Lamiaceae	Lamium	Lamium amplexicaule	1	1	1	1	1	1	1	1	1	1	1	1
Lamiales	Lamiaceae	Lamium	Lamium confertum	0	0	0	0	0	0	0	0	0	0	0	0
Lamiales	Lamiaceae	Lamium	Lamium hybridum	1	1	1	1	1	1	1	1	1	1	1	1
Lamiales	Lamiaceae	Lamium	Lamium purpureum	0	0	0	0	0	0	0	0	0	0	0	0
Lamiales	Lamiaceae	Lycopus	Lycopus europaeus	1	1	1	1	1	1	1	1	1	1	1	1
Lamiales	Lamiaceae	Melittis	Melittis melissophyllum	1	1	1	1	1	1	1	1	1	1	1	1
Lamiales	Lamiaceae	Mentha	Mentha pulegium	1	1	1	1	1	0	0	0	1	1	1	1
Lamiales	Lamiaceae	Mentha	Mentha spicata	1	0	0	0	1	0	0	0	1	1	1	1
Lamiales	Lamiaceae	Mentha	Mentha suaveolens	1	0	0	0	1	1	1	1	1	1	1	1
Lamiales	Lamiaceae	Nepeta	Nepeta cataria	1	1	1	1	1	1	1	1	1	1	1	1
Lamiales	Lamiaceae	Origanum	Origanum vulgare	1	1	1	1	1	1	1	0	1	1	1	1
Lamiales	Lamiaceae	Scutellaria	Scutellaria galericulata	0	0	0	0	0	0	0	0	0	0	0	0
Lamiales	Lamiaceae	Scutellaria	Scutellaria minor	0	0	0	0	0	0	0	0	0	0	0	0
Lamiales	Lamiaceae	Stachys	Stachys alpina	1	1	1	1	1	1	1	1	1	1	1	1
Lamiales	Lamiaceae	Stachys	Stachys arvensis	1	1	1	1	1	1	1	1	1	1	1	1
Lamiales	Lamiaceae	Stachys	Stachys officinalis	1	1	1	1	1	1	1	1	1	1	1	1
Lamiales	Lamiaceae	Stachys	Stachys palustris	0	0	0	0	0	0	0	0	0	0	0	0
Lamiales	Lamiaceae	Stachys	Stachys sylvatica	0	0	0	0	0	0	0	0	0	0	0	0
Lamiales	Lamiaceae	Teucrium	Teucrium scordium	1	1	1	1	1	1	1	1	1	1	1	1
Lamiales	Lamiaceae	Teucrium	Teucrium scorodonia	1	1	1	1	1	1	1	1	1	1	1	1
Lamiales	Lamiaceae	Thymus	Thymus polytrichus	0	0	0	0	0	0	0	0	0	1	0	0
Lamiales	Lentibulariaceae	Utricularia	Utricularia minor	0	0	0	0	1	1	1	1	1	1	1	1
Lamiales	Lentibulariaceae	Utricularia	Utricularia vulgaris	0	0	0	0	1	1	1	1	1	1	1	1
Lamiales	Oleaceae	Fraxinus	Fraxinus excelsior	1	1	1	1	1	1	1	1	1	1	1	1
Lamiales	Oleaceae	Ligustrum	Ligustrum vulgare	1	1	1	1	1	1	1	1	1	1	1	1
Lamiales	Orobanchaceae	Euphrasia	Euphrasia anglica	0	0	0	0	0	0	0	0	0	0	0	0
Lamiales	Orobanchaceae	Euphrasia	Euphrasia arctica	0	0	0	0	0	0	0	0	0	0	0	0
Lamiales	Orobanchaceae	Euphrasia	Euphrasia cambrica	0	0	0	0	1	0	0	0	0	0	0	0
Lamiales	Orobanchaceae	Euphrasia	Euphrasia confusa	0	0	0	0	0	0	0	0	0	0	0	0
Lamiales	Orobanchaceae	Euphrasia	Euphrasia micrantha	0	0	0	0	0	0	0	0	0	0	0	0
Lamiales	Orobanchaceae	Euphrasia	Euphrasia nemorosa	0	0	0	0	0	0	0	0	0	0	0	0
Lamiales	Orobanchaceae	Euphrasia	Euphrasia ostenfeldii	0	0	0	0	1	1	0	0	1	1	0	0
Lamiales	Orobanchaceae	Euphrasia	Euphrasia pseudokerneri	0	0	0	0	0	0	0	0	0	0	0	0
Lamiales	Orobanchaceae	Euphrasia	Euphrasia rivularis	0	0	0	0	1	0	0	0	1	0	0	0
Lamiales	Orobanchaceae	Euphrasia	Euphrasia rostkoviana	0	0	0	0	0	0	0	0	0	0	0	0
Lamiales	Orobanchaceae	Euphrasia	Euphrasia scottica	0	0	0	0	1	0	0	0	1	0	0	0
Lamiales	Orobanchaceae	Euphrasia	Euphrasia tetraquetra	0	0	0	0	0	0	0	0	0	0	0	0
Lamiales	Orobanchaceae	Melampyrum	Melampyrum pratense	1	1	1	1	1	1	1	1	1	1	1	1
Lamiales	Orobanchaceae	Odontites	Odontites vernus	1	1	1	1	1	1	1	1	1	1	1	1
Lamiales	Orobanchaceae	Parentucellia	Parentucellia viscosa	1	1	1	1	1	1	1	1	1	1	1	1
Lamiales	Orobanchaceae	Pedicularis	Pedicularis palustris	1	1	1	1	1	1	1	1	1	1	1	1
Lamiales	Orobanchaceae	Pedicularis	Pedicularis sylvatica	1	1	1	1	1	1	1	1	1	1	1	1
Lamiales	Orobanchaceae	Rhinanthus	Rhinanthus minor	1	1	1	1	1	1	1	1	1	1	1	1
Lamiales	Plantaginaceae	Callitriche	Callitriche hamulata	1	1	1	1	1	1	1	1	1	1	1	1
Lamiales	Plantaginaceae	Callitriche	Callitriche hermaphroditica	1	1	1	1	1	1	1	1	1	1	1	1
Lamiales	Plantaginaceae	Callitriche	Callitriche obtusangula	1	1	0	0	1	1	1	1	1	1	1	1
Lamiales	Plantaginaceae	Callitriche	Callitriche platycarpa	0	0	0	0	1	1	1	1	1	1	1	1
Lamiales	Plantaginaceae	Callitriche	Callitriche truncata	1	1	1	1	1	1	1	1	1	1	1	1
Lamiales	Plantaginaceae	Chaenorhinum	Chaenorhinum minus	1	1	1	1	1	1	1	1	1	1	1	1
Lamiales	Plantaginaceae	Digitalis	Digitalis purpurea	1	1	1	1	1	1	1	1	1	1	1	1
Lamiales	Plantaginaceae	Hippuris	Hippuris vulgaris	1	1	1	1	1	1	1	1	1	1	1	1
Lamiales	Plantaginaceae	Kickxia	Kickxia elatine	1	1	1	1	1	1	1	1	1	1	1	1
Lamiales	Plantaginaceae	Kickxia	Kickxia spuria	1	1	1	1	1	1	1	1	1	1	1	1
Lamiales	Plantaginaceae	Linaria	Linaria repens	1	1	1	1	1	1	1	1	1	1	1	1
Lamiales	Plantaginaceae	Linaria	Linaria vulgaris	1	1	1	1	1	1	1	1	1	1	1	1
Lamiales	Plantaginaceae	Littorella	Littorella uniflora	1	1	1	1	1	1	1	1	1	1	1	1
Lamiales	Plantaginaceae	Misopates	Misopates orontium	1	1	1	1	1	1	1	1	1	1	1	1
Lamiales	Plantaginaceae	Plantago	Plantago lanceolata	1	1	1	1	1	1	1	1	1	1	1	1
Lamiales	Plantaginaceae	Plantago	Plantago major	1	1	1	1	1	1	1	1	1	1	1	1
Lamiales	Plantaginaceae	Plantago	Plantago media	1	1	1	1	1	1	1	1	1	1	1	1
Lamiales	Plantaginaceae	Sibthorpia	Sibthorpia europaea	1	1	1	1	1	1	1	1	1	1	1	1
Lamiales	Plantaginaceae	Veronica	Veronica anagallis	0	0	0	0	0	0	0	0	0	0	0	0
Lamiales	Plantaginaceae	Veronica	Veronica arvensis	1	1	1	1	1	1	1	1	1	1	1	1
Lamiales	Plantaginaceae	Veronica	Veronica beccabunga	1	1	1	1	1	1	1	1	1	1	1	1
Lamiales	Plantaginaceae	Veronica	Veronica catenata	0	0	0	0	0	0	0	0	0	0	0	0
Lamiales	Plantaginaceae	Veronica	Veronica chamaedrys	1	1	1	1	1	1	1	1	1	1	1	1
Lamiales	Plantaginaceae	Veronica	Veronica hederifolia	1	1	1	1	1	1	1	1	1	1	1	1
Lamiales	Plantaginaceae	Veronica	Veronica montana	1	1	1	1	1	1	1	1	1	1	1	1
Lamiales	Plantaginaceae	Veronica	Veronica officinalis	1	1	1	1	1	1	1	1	1	1	1	1
Lamiales	Plantaginaceae	Veronica	Veronica scutellata	1	1	1	1	1	1	1	1	1	1	1	1
Lamiales	Plantaginaceae	Veronica	Veronica serpyllifolia	1	1	1	1	1	1	1	1	1	1	1	1
Lamiales	Scrophulariaceae	Scrophularia	Scrophularia auriculata	1	1	1	1	1	1	1	1	1	1	1	1
Lamiales	Scrophulariaceae	Scrophularia	Scrophularia nodosa	1	1	1	1	1	1	1	1	1	1	1	1
Lamiales	Scrophulariaceae	Verbascum	Verbascum nigrum	0	0	0	0	1	1	0	0	1	1	0	0
Lamiales	Scrophulariaceae	Verbascum	Verbascum thapsus	0	0	0	0	0	0	0	0	1	1	0	0
Lamiales	Verbenaceae	Verbena	Verbena officinalis	1	1	1	1	1	1	1	1	1	1	1	1
Liliales	Melianthiaceae	Paris	Paris quadrifolia	1	1	1	1	1	1	1	1	1	1	1	1
Malpighiales	Euphorbiaceae	Euphorbia	Euphorbia amygdaloides	1	1	1	1	1	1	1	1	1	1	1	1
Malpighiales	Euphorbiaceae	Euphorbia	Euphorbia exigua	1	1	1	1	1	1	1	1	1	1	1	1
Malpighiales	Euphorbiaceae	Euphorbia	Euphorbia helioscopia	1	1	1	1	1	1	1	1	1	1	1	1
Malpighiales	Euphorbiaceae	Euphorbia	Euphorbia lathyris	1	1	1	1	1	1	1	1	1	1	1	1
Malpighiales	Euphorbiaceae	Euphorbia	Euphorbia paralias	0	0	0	0	1	1	1	1	1	1	1	1
Malpighiales	Euphorbiaceae	Euphorbia	Euphorbia peplus	1	1	1	1	1	1	1	1	1	1	1	1
Malpighiales	Euphorbiaceae	Euphorbia	Euphorbia platyphyllos	0	0	0	0	0	0	0	0	0	0	0	0
Malpighiales	Euphorbiaceae	Euphorbia	Euphorbia portlandica	0	0	0	0	1	1	1	1	1	1	1	1
Malpighiales	Euphorbiaceae	Euphorbia	Euphorbia serrulata	0	0	0	0	0	0	0	0	0	0	0	0
Malpighiales	Euphorbiaceae	Mercurialis	Mercurialis annua	1	1	1	1	1	1	1	1	1	1	1	1
Malpighiales	Euphorbiaceae	Mercurialis	Mercurialis perennis	1	1	1	1	1	1	1	1	1	1	1	1
Malpighiales	Linaceae	Linum	Linum bienne	1	1	1	1	1	1	1	1	1	1	1	1
Malpighiales	Linaceae	Linum	Linum catharticum	1	1	1	1	1	1	1	1	1	1	1	1
Malpighiales	Salicaceae	Populus	Populus nigra	0	0	0	0	1	1	0	0	1	1	0	0
Malpighiales	Salicaceae	Populus	Populus tremula	0	0	0	0	1	1	0	0	1	1	0	0
Malpighiales	Salicaceae	Salix	Salix alba	0	0	0	0	1	1	0	0	1	1	0	0
Malpighiales	Salicaceae	Salix	Salix aurita	0	0	0	0	0	0	0	0	0	0	0	0
Malpighiales	Salicaceae	Salix	Salix caprea	0	0	0	0	1	0	0	0	0	0	0	0
Malpighiales	Salicaceae	Salix	Salix cinerea	0	0	0	0	1	0	0	0	0	0	0	0
Malpighiales	Salicaceae	Salix	Salix fragilis	0	0	0	0	0	0	0	0	0	1	0	0
Malpighiales	Salicaceae	Salix	Salix herbacea	0	0	0	0	1	0	0	0	0	0	0	0
Malpighiales	Salicaceae	Salix	Salix pentandra	0	0	0	0	1	1	0	0	1	1	0	0
Malpighiales	Salicaceae	Salix	Salix purpurea	0	0	0	0	1	0	0	0	0	0	0	0
Malpighiales	Salicaceae	Salix	Salix repens	0	0	0	0	1	0	0	0	0	0	0	0
Malpighiales	Salicaceae	Salix	Salix triandra	1	1	1	1	1	1	1	1	1	1	1	1
Malpighiales	Salicaceae	Salix	Salix viminalis	0	0	0	0	1	0	0	0	0	0	0	0
Malpighiales	Violaceae	Viola	Viola arvensis	1	1	1	1	1	1	1	1	1	1	1	1
Malpighiales	Violaceae	Viola	Viola canina	0	0	0	0	0	0	0	0	0	0	0	0
Malpighiales	Violaceae	Viola	Viola hirta	0	0	0	0	1	0	0	0	0	0	0	0
Malpighiales	Violaceae	Viola	Viola lactea	0	0	0	0	0	0	0	0	0	0	0	0
Malpighiales	Violaceae	Viola	Viola lutea	0	0	0	0	0	0	0	0	0	0	0	0
Malpighiales	Violaceae	Viola	Viola odorata	0	0	0	0	0	0	0	0	0	0	0	0
Malpighiales	Violaceae	Viola	Viola palustris	1	1	1	1	1	1	1	1	1	1	1	1
Malpighiales	Violaceae	Viola	Viola reichenbachiana	0	0	0	0	1	0	0	0	1	0	0	0
Malpighiales	Violaceae	Viola	Viola riviniana	0	0	0	0	1	0	0	0	1	0	0	0
Malpighiales	Violaceae	Viola	Viola tricolor	0	0	0	0	0	0	0	0	0	0	0	0
Malvales	Malvaceae	Althaea	Althaea officinalis	1	1	1	1	1	1	1	1	1	1	1	1
Malvales	Malvaceae	Malva	Malva arborea	0	0	0	0	0	0	0	0	0	0	0	0
Malvales	Malvaceae	Malva	Malva moschata	1	1	1	1	1	1	1	1	1	1	1	1
Malvales	Malvaceae	Malva	Malva neglecta	0	0	0	0	0	0	0	0	0	0	0	0
Malvales	Malvaceae	Malva	Malva sylvestris	0	0	0	0	0	0	0	0	0	0	0	0
Malvales	Malvaceae	Tilia	Tilia cordata	0	0	0	0	0	0	0	0	0	0	0	0
Malvales	Malvaceae	Tilia	Tilia platyphyllos	0	0	0	0	0	0	0	0	0	0	0	0
Malvales	Thymelaeaceae	Daphne	Daphne laureola	1	1	1	1	1	1	1	1	1	1	1	1
Malvales	Thymelaeaceae	Daphne	Daphne mezereum	1	1	1	1	1	1	1	1	1	1	1	1
Myrtales	Onagraceae	Chamerion	Chamerion angustifolium	1	1	1	1	1	1	1	1	1	1	1	1
Myrtales	Onagraceae	Epilobium	Epilobium montanum	0	0	0	0	0	0	0	0	0	0	0	0
Myrtales	Onagraceae	Epilobium	Epilobium roseum	0	0	0	0	1	1	1	1	1	1	1	1
Myrtales	Onagraceae	Epilobium	Epilobium tetragonum	0	0	0	0	0	0	0	0	0	1	0	0
Nymphaeales	Nymphaeaceae	Nuphar	Nuphar lutea	1	1	1	1	1	1	1	1	1	1	1	1
Nymphaeales	Nymphaeaceae	Nymphaea	Nymphaea alba	1	1	1	1	1	1	1	1	1	1	1	1
Oxalidales	Oxalidaceae	Oxalis	Oxalis acetosella	1	1	1	1	1	1	1	1	1	1	1	1
Pinales	Taxaceae	Taxus	Taxus baccata	1	1	1	1	1	1	1	1	1	1	1	1
Poales	Cyperaceae	Carex	Carex acutiformis	1	1	1	1	1	1	1	1	1	1	1	1
Poales	Cyperaceae	Carex	Carex arenaria	0	0	0	0	1	1	1	1	1	1	1	1
Poales	Cyperaceae	Carex	Carex caryophyllea	1	1	1	1	1	1	1	1	1	1	1	1
Poales	Cyperaceae	Carex	Carex depauperata	1	1	1	1	1	1	1	1	1	1	1	1
Poales	Cyperaceae	Carex	Carex dioica	0	0	0	0	1	1	1	1	1	1	1	1
Poales	Cyperaceae	Carex	Carex distans	1	1	1	1	1	1	1	1	1	1	1	1
Poales	Cyperaceae	Carex	Carex disticha	1	0	0	0	1	1	1	1	1	1	1	1
Poales	Cyperaceae	Carex	Carex divulsa	0	0	0	0	1	1	1	1	1	1	1	1
Poales	Cyperaceae	Carex	Carex elata	0	0	0	0	0	0	0	0	0	0	0	0
Poales	Cyperaceae	Carex	Carex extensa	1	1	1	1	1	1	1	1	1	1	1	1
Poales	Cyperaceae	Carex	Carex flacca	1	1	1	1	1	1	1	1	1	1	1	1
Poales	Cyperaceae	Carex	Carex hirta	1	1	1	1	1	1	1	1	1	1	1	1
Poales	Cyperaceae	Carex	Carex hostiana	0	0	0	0	1	1	1	1	1	1	1	1
Poales	Cyperaceae	Carex	Carex limosa	0	0	0	0	0	0	0	0	0	0	0	0
Poales	Cyperaceae	Carex	Carex montana	0	0	0	0	1	1	1	1	1	1	1	1
Poales	Cyperaceae	Carex	Carex muricata	0	0	0	0	1	1	1	1	1	1	1	1
Poales	Cyperaceae	Carex	Carex nigra	0	0	0	0	0	0	0	0	0	0	0	0
Poales	Cyperaceae	Carex	Carex otrubae	0	0	0	0	1	1	1	1	1	1	1	1
Poales	Cyperaceae	Carex	Carex pallescens	1	1	1	1	1	1	1	1	1	1	1	1
Poales	Cyperaceae	Carex	Carex panicea	1	1	1	1	1	1	1	1	1	1	1	1
Poales	Cyperaceae	Carex	Carex paniculata	1	0	0	0	1	1	1	1	1	1	1	1
Poales	Cyperaceae	Carex	Carex pendula	1	1	1	1	1	1	1	1	1	1	1	1
Poales	Cyperaceae	Carex	Carex pilulifera	1	1	1	1	1	1	1	1	1	1	1	1
Poales	Cyperaceae	Carex	Carex pseudocyperus	1	0	0	0	1	1	1	1	1	1	1	1
Poales	Cyperaceae	Carex	Carex remota	1	1	1	1	1	1	1	1	1	1	1	1
Poales	Cyperaceae	Carex	Carex riparia	0	0	0	0	1	1	1	1	1	1	1	1
Poales	Cyperaceae	Carex	Carex rostrata	1	0	0	0	1	1	1	1	1	1	1	1
Poales	Cyperaceae	Carex	Carex spicata	0	0	0	0	1	1	1	1	1	1	1	1
Poales	Cyperaceae	Carex	Carex strigosa	1	1	1	1	1	1	1	1	1	1	1	1
Poales	Cyperaceae	Carex	Carex sylvatica	1	0	0	0	1	1	1	1	1	1	1	1
Poales	Cyperaceae	Carex	Carex viridula	0	0	0	0	1	1	1	1	1	1	1	1
Poales	Cyperaceae	Cladium	Cladium mariscus	1	1	1	1	1	1	1	1	1	1	1	1
Poales	Cyperaceae	Cyperus	Cyperus longus	1	1	1	1	1	1	1	1	1	1	1	1
Poales	Cyperaceae	Eleocharis	Eleocharis quinqueflora	1	1	1	1	1	1	1	1	1	1	1	1
Poales	Cyperaceae	Eriophorum	Eriophorum angustifolium	0	0	0	0	0	0	0	0	0	0	0	0
Poales	Cyperaceae	Eriophorum	Eriophorum latifolium	0	0	0	0	1	1	1	1	1	1	1	1
Poales	Cyperaceae	Eriophorum	Eriophorum vaginatum	0	0	0	0	0	0	0	0	0	0	0	0
Poales	Cyperaceae	Isolepis	Isolepis setacea	1	1	1	1	1	1	1	1	1	1	1	1
Poales	Cyperaceae	Rhynchospora	Rhynchospora alba	1	1	1	1	1	1	1	1	1	1	1	1
Poales	Cyperaceae	Schoenoplectus	Schoenoplectus lacustris	1	1	1	1	1	1	1	1	1	1	1	1
Poales	Cyperaceae	Schoenoplectus	Schoenoplectus tabernaemontani	1	1	1	1	1	1	1	1	1	1	1	1
Poales	Cyperaceae	Schoenus	Schoenus nigricans	1	1	1	1	1	1	1	1	1	1	1	1
Poales	Cyperaceae	Scirpus	Scirpus sylvaticus	1	1	1	1	1	1	1	1	1	1	1	1
Poales	Cyperaceae	Trichophorum	Trichophorum cespitosum	0	0	0	0	1	1	1	1	1	1	1	1
Poales	Juncaceae	Juncus	Juncus acutus	1	1	1	1	1	1	1	1	1	1	1	1
Poales	Juncaceae	Juncus	Juncus ambiguus	0	0	0	0	1	1	1	1	1	1	1	1
Poales	Juncaceae	Juncus	Juncus bufonius	1	1	1	1	1	1	1	1	1	1	1	1
Poales	Juncaceae	Juncus	Juncus conglomeratus	0	0	0	0	1	1	1	1	1	1	0	1
Poales	Juncaceae	Juncus	Juncus effusus	0	0	0	0	1	1	1	1	1	1	0	1
Poales	Juncaceae	Juncus	Juncus foliosus	0	0	0	0	1	1	1	1	1	1	1	1
Poales	Juncaceae	Juncus	Juncus gerardii	1	1	1	1	1	1	1	1	1	1	1	1
Poales	Juncaceae	Juncus	Juncus inflexus	1	1	1	1	1	1	1	1	1	1	1	1
Poales	Juncaceae	Juncus	Juncus maritimus	1	1	1	1	1	1	1	1	1	1	1	1
Poales	Juncaceae	Juncus	Juncus squarrosus	1	1	1	1	1	1	1	1	1	1	1	1
Poales	Juncaceae	Luzula	Luzula campestris	0	0	0	0	0	0	0	0	0	0	0	0
Poales	Juncaceae	Luzula	Luzula forsteri	1	1	1	1	1	1	1	1	1	1	1	1
Poales	Juncaceae	Luzula	Luzula multiflora	0	0	0	0	0	0	0	0	0	0	0	0
Poales	Juncaceae	Luzula	Luzula pilosa	1	1	1	1	1	1	1	1	1	1	1	1
Poales	Poaceae	Agrostis	Agrostis canina	0	0	0	0	0	0	0	0	0	0	0	0
Poales	Poaceae	Agrostis	Agrostis capillaris	1	1	1	1	1	1	1	1	1	1	1	1
Poales	Poaceae	Agrostis	Agrostis gigantea	0	0	0	0	0	0	0	0	0	0	0	0
Poales	Poaceae	Agrostis	Agrostis stolonifera	0	0	0	0	0	0	0	0	0	0	0	0
Poales	Poaceae	Agrostis	Agrostis vinealis	0	0	0	0	0	0	0	0	0	0	0	0
Poales	Poaceae	Aira	Aira caryophyllea	0	0	0	0	1	1	1	1	1	1	1	1
Poales	Poaceae	Aira	Aira praecox	0	0	0	0	1	1	1	1	1	1	1	1
Poales	Poaceae	Alopecurus	Alopecurus geniculatus	1	0	0	0	0	0	0	0	0	1	0	0
Poales	Poaceae	Alopecurus	Alopecurus pratensis	1	1	1	1	1	1	1	1	1	1	1	1
Poales	Poaceae	Ammophila	Ammophila arenaria	1	1	1	1	0	0	0	0	1	1	1	1
Poales	Poaceae	Anisantha	Anisantha sterilis	1	1	1	1	1	1	1	1	1	1	1	1
Poales	Poaceae	Anthoxanthum	Anthoxanthum odoratum	1	1	1	1	1	1	1	1	1	1	1	1
Poales	Poaceae	Arrhenatherum	Arrhenatherum elatius	1	1	1	1	1	1	1	1	1	1	1	1
Poales	Poaceae	Avena	Avena fatua	1	1	1	1	1	1	1	1	1	1	1	1
Poales	Poaceae	Avenula	Avenula pratensis	1	1	1	1	1	1	1	1	1	1	1	1
Poales	Poaceae	Avenula	Avenula pubescens	1	1	0	0	1	1	1	1	1	1	1	1
Poales	Poaceae	Brachypodium	Brachypodium pinnatum	0	0	0	0	1	1	1	1	1	1	1	1
Poales	Poaceae	Brachypodium	Brachypodium sylvaticum	0	0	0	0	1	1	1	1	1	1	1	1
Poales	Poaceae	Briza	Briza media	1	1	1	1	1	1	1	1	1	1	1	1
Poales	Poaceae	Bromopsis	Bromopsis erecta	1	0	0	0	1	1	1	1	1	1	1	1
Poales	Poaceae	Bromopsis	Bromopsis ramosa	1	0	0	0	1	1	1	1	1	1	1	1
Poales	Poaceae	Bromus	Bromus commutatus	0	0	0	0	0	0	0	0	0	0	0	0
Poales	Poaceae	Bromus	Bromus hordeaceus	0	0	0	0	0	0	0	0	0	0	0	0
Poales	Poaceae	Bromus	Bromus racemosus	0	0	0	0	1	1	0	0	1	1	0	0
Poales	Poaceae	Bromus	Bromus secalinus	0	0	0	0	0	0	0	0	0	0	0	0
Poales	Poaceae	Calamagrostis	Calamagrostis canescens	1	1	1	1	1	1	1	1	1	1	1	1
Poales	Poaceae	Calamagrostis	Calamagrostis epigejos	1	1	1	1	0	0	0	0	1	1	1	1
Poales	Poaceae	Catabrosa	Catabrosa aquatica	0	0	0	0	1	1	1	1	1	1	1	1
Poales	Poaceae	Catapodium	Catapodium marinum	0	0	0	0	0	0	0	0	0	0	0	0
Poales	Poaceae	Catapodium	Catapodium rigidum	0	0	0	0	0	0	0	0	0	0	0	0
Poales	Poaceae	Cynosurus	Cynosurus cristatus	1	1	1	1	1	1	1	1	1	1	1	1
Poales	Poaceae	Dactylis	Dactylis glomerata	1	1	1	1	1	1	1	1	1	1	1	1
Poales	Poaceae	Danthonia	Danthonia decumbens	1	1	1	1	1	1	1	1	1	1	1	1
Poales	Poaceae	Deschampsia	Deschampsia cespitosa	1	1	1	1	1	1	1	1	1	1	1	1
Poales	Poaceae	Deschampsia	Deschampsia flexuosa	1	1	1	1	1	1	1	1	1	1	1	1
Poales	Poaceae	Deschampsia	Deschampsia setacea	1	1	1	1	1	1	1	1	1	1	1	1
Poales	Poaceae	Elymus	Elymus caninus	0	0	0	0	1	0	0	0	1	0	0	0
Poales	Poaceae	Elytrigia	Elytrigia atherica	0	0	0	0	0	0	0	0	0	0	0	0
Poales	Poaceae	Elytrigia	Elytrigia juncea	0	0	0	0	1	1	1	1	1	1	1	1
Poales	Poaceae	Elytrigia	Elytrigia repens	0	0	0	0	1	1	0	0	1	1	0	0
Poales	Poaceae	Festuca	Festuca altissima	1	1	1	1	1	1	1	1	1	1	1	1
Poales	Poaceae	Festuca	Festuca arenaria	0	0	0	0	0	0	0	0	0	0	0	0
Poales	Poaceae	Festuca	Festuca arundinacea	0	0	0	0	1	1	1	1	1	1	1	1
Poales	Poaceae	Festuca	Festuca filiformis	0	0	0	0	1	0	0	0	1	0	0	0
Poales	Poaceae	Festuca	Festuca gigantea	0	0	0	0	1	1	1	1	1	1	0	0
Poales	Poaceae	Festuca	Festuca lemanii	0	0	0	0	0	0	0	0	0	0	0	0
Poales	Poaceae	Festuca	Festuca ovina	0	0	0	0	1	0	0	0	1	0	0	0
Poales	Poaceae	Festuca	Festuca pratensis	0	0	0	0	1	0	0	0	1	1	0	0
Poales	Poaceae	Festuca	Festuca rubra	0	0	0	0	0	0	0	0	0	0	0	0
Poales	Poaceae	Gastridium	Gastridium ventricosum	1	1	1	1	1	1	1	1	1	1	1	1
Poales	Poaceae	Glyceria	Glyceria declinata	0	0	0	0	1	1	0	0	1	1	0	0
Poales	Poaceae	Glyceria	Glyceria fluitans	0	0	0	0	0	0	0	0	0	0	0	0
Poales	Poaceae	Glyceria	Glyceria maxima	1	1	1	1	1	1	1	1	1	1	1	1
Poales	Poaceae	Glyceria	Glyceria notata	0	0	0	0	0	0	0	0	0	0	0	0
Poales	Poaceae	Holcus	Holcus lanatus	1	1	1	1	1	1	1	1	1	1	1	1
Poales	Poaceae	Holcus	Holcus mollis	1	1	1	1	1	1	1	1	1	1	1	1
Poales	Poaceae	Hordeum	Hordeum murinum	1	1	1	1	1	1	1	1	1	1	1	1
Poales	Poaceae	Hordeum	Hordeum secalinum	1	1	1	1	1	1	1	1	1	1	1	1
Poales	Poaceae	Koeleria	Koeleria macrantha	1	1	1	1	1	1	1	1	1	1	1	1
Poales	Poaceae	Lolium	Lolium perenne	0	0	0	0	1	1	1	1	1	1	1	1
Poales	Poaceae	Melica	Melica nutans	1	1	1	1	1	1	1	1	1	1	1	1
Poales	Poaceae	Melica	Melica uniflora	1	1	1	1	1	1	1	1	1	1	1	1
Poales	Poaceae	Milium	Milium effusum	1	1	1	1	1	1	1	1	1	1	1	1
Poales	Poaceae	Molinia	Molinia caerulea	1	1	1	1	1	1	1	1	1	1	1	1
Poales	Poaceae	Nardus	Nardus stricta	1	1	1	1	1	1	1	1	1	1	1	1
Poales	Poaceae	Parapholis	Parapholis strigosa	1	0	0	0	0	0	0	0	0	0	0	0
Poales	Poaceae	Phalaris	Phalaris arundinacea	1	1	1	1	1	1	1	1	1	1	1	1
Poales	Poaceae	Phleum	Phleum arenarium	1	1	1	1	1	1	1	1	1	1	1	1
Poales	Poaceae	Phleum	Phleum bertolonii	0	0	0	0	0	1	0	0	0	1	0	0
Poales	Poaceae	Phleum	Phleum pratense	0	0	0	0	1	1	0	0	1	1	0	0
Poales	Poaceae	Phragmites	Phragmites australis	1	1	1	1	1	1	1	1	1	1	1	1
Poales	Poaceae	Poa	Poa angustifolia	1	0	0	0	0	0	0	0	0	0	0	0
Poales	Poaceae	Poa	Poa annua	1	1	1	1	1	1	1	1	1	1	1	1
Poales	Poaceae	Poa	Poa glauca	1	0	0	0	0	0	0	0	0	0	0	0
Poales	Poaceae	Poa	Poa humilis	1	0	0	0	0	0	0	0	0	1	0	0
Poales	Poaceae	Poa	Poa nemoralis	1	0	0	0	0	0	0	0	0	0	0	0
Poales	Poaceae	Poa	Poa pratensis	0	0	0	0	0	0	0	0	0	0	0	0
Poales	Poaceae	Poa	Poa trivialis	0	0	0	0	1	1	1	1	1	1	1	1
Poales	Poaceae	Puccinellia	Puccinellia distans	0	0	0	0	0	1	0	0	0	1	0	0
Poales	Poaceae	Puccinellia	Puccinellia maritima	0	0	0	0	0	1	0	0	0	1	0	0
Poales	Poaceae	Spartina	Spartina anglica	1	1	1	1	1	1	1	1	1	1	1	1
Poales	Poaceae	Trisetum	Trisetum flavescens	1	1	1	1	1	1	1	1	1	1	1	1
Poales	Poaceae	Vulpia	Vulpia bromoides	1	1	1	1	1	1	1	1	1	1	1	1
Poales	Poaceae	Vulpia	Vulpia fasciculata	1	1	1	1	1	1	1	1	1	1	1	1
Poales	Typhaceae	Sparganium	Sparganium emersum	0	0	0	0	0	0	0	0	0	0	0	0
Poales	Typhaceae	Sparganium	Sparganium erectum	1	0	0	0	1	1	1	1	1	1	1	1
Poales	Typhaceae	Typha	Typha latifolia	0	0	0	0	0	0	0	0	0	0	0	0
Ranunculales	Papaveraceae	Ceratocapnos	Ceratocapnos claviculata	1	1	1	1	1	1	1	1	1	1	1	1
Ranunculales	Papaveraceae	Chelidonium	Chelidonium majus	1	1	1	1	1	1	1	1	1	1	1	1
Ranunculales	Papaveraceae	Fumaria	Fumaria bastardii	0	0	0	0	0	0	0	0	0	0	0	0
Ranunculales	Papaveraceae	Fumaria	Fumaria capreolata	0	0	0	0	0	0	0	0	0	0	0	0
Ranunculales	Papaveraceae	Fumaria	Fumaria densiflora	0	0	0	0	0	0	0	0	0	0	0	0
Ranunculales	Papaveraceae	Fumaria	Fumaria muralis	0	0	0	0	0	0	0	0	0	0	0	0
Ranunculales	Papaveraceae	Fumaria	Fumaria purpurea	0	0	0	0	0	0	0	0	0	0	0	0
Ranunculales	Papaveraceae	Glaucium	Glaucium flavum	1	1	1	1	1	1	1	1	1	1	1	1
Ranunculales	Papaveraceae	Meconopsis	Meconopsis cambrica	1	1	1	1	1	1	1	1	1	1	1	1
Ranunculales	Papaveraceae	Papaver	Papaver argemone	1	1	1	1	1	1	1	1	1	1	1	1
Ranunculales	Papaveraceae	Papaver	Papaver dubium	1	1	1	1	1	1	1	1	1	1	1	1
Ranunculales	Papaveraceae	Papaver	Papaver hybridum	1	1	1	1	0	1	1	1	1	1	1	1
Ranunculales	Papaveraceae	Papaver	Papaver rhoeas	1	1	1	1	1	1	1	1	1	1	1	1
Ranunculales	Papaveraceae	Papaver	Papaver somniferum	1	1	1	1	1	1	1	1	1	1	1	1
Ranunculales	Ranunculaceae	Aconitum	Aconitum napellus	1	1	1	1	1	1	1	1	1	1	1	1
Ranunculales	Ranunculaceae	Adonis	Adonis annua	1	1	1	1	1	1	1	1	1	1	1	1
Ranunculales	Ranunculaceae	Anemone	Anemone nemorosa	1	1	1	1	1	1	1	1	1	1	1	1
Ranunculales	Ranunculaceae	Caltha	Caltha palustris	1	1	1	1	1	1	1	1	1	1	1	1
Ranunculales	Ranunculaceae	Clematis	Clematis vitalba	1	1	1	1	1	1	1	1	1	1	1	1
Ranunculales	Ranunculaceae	Helleborus	Helleborus viridis	1	1	1	1	1	1	1	1	1	1	1	1
Ranunculales	Ranunculaceae	Ranunculus	Ranunculus aquatilis	0	0	0	0	0	0	0	0	0	0	0	0
Ranunculales	Ranunculaceae	Ranunculus	Ranunculus ficaria	1	1	1	1	1	1	1	1	1	1	1	1
Ranunculales	Ranunculaceae	Ranunculus	Ranunculus lingua	0	0	0	0	1	1	0	0	1	1	0	0
Ranunculales	Ranunculaceae	Ranunculus	Ranunculus omiophyllus	0	0	0	0	0	0	0	0	0	0	0	0
Ranunculales	Ranunculaceae	Ranunculus	Ranunculus sceleratus	1	1	1	1	1	1	1	1	1	1	1	1
Ranunculales	Ranunculaceae	Ranunculus	Ranunculus trichophyllus	0	0	0	0	0	0	0	0	0	0	0	0
Ranunculales	Ranunculaceae	Ranunculus	Ranunculus tripartitus	0	0	0	0	0	0	0	0	0	0	0	0
Ranunculales	Ranunculaceae	Thalictrum	Thalictrum alpinum	1	1	1	1	1	1	1	1	1	1	1	1
Ranunculales	Ranunculaceae	Thalictrum	Thalictrum flavum	0	0	0	0	0	0	0	0	0	0	0	0
Ranunculales	Ranunculaceae	Thalictrum	Thalictrum minus	0	0	0	0	0	0	0	0	0	0	0	0
Ranunculales	Ranunculaceae	Trollius	Trollius europaeus	1	1	1	1	1	1	1	1	1	1	1	1
Rosales	Cannabaceae	Humulus	Humulus lupulus	1	1	1	1	1	1	1	1	1	1	1	1
Rosales	Rhamnaceae	Frangula	Frangula alnus	1	1	1	1	1	1	1	1	1	1	1	1
Rosales	Rhamnaceae	Rhamnus	Rhamnus cathartica	1	1	1	1	1	1	1	1	1	1	1	1
Rosales	Rosaceae	Agrimonia	Agrimonia eupatoria	0	0	0	0	0	0	0	0	0	0	0	0
Rosales	Rosaceae	Agrimonia	Agrimonia procera	0	0	0	0	0	0	0	0	0	0	0	0
Rosales	Rosaceae	Alchemilla	Alchemilla filicaulis	1	1	1	1	1	1	0	0	1	1	1	1
Rosales	Rosaceae	Alchemilla	Alchemilla glabra	0	0	0	0	1	1	1	1	1	1	1	1
Rosales	Rosaceae	Alchemilla	Alchemilla xanthochlora	0	0	0	0	1	0	0	0	1	1	1	1
Rosales	Rosaceae	Aphanes	Aphanes arvensis	0	0	0	0	0	0	0	0	0	0	0	0
Rosales	Rosaceae	Crataegus	Crataegus laevigata	0	0	0	0	0	0	0	0	0	0	0	0
Rosales	Rosaceae	Crataegus	Crataegus monogyna	0	0	0	0	0	0	0	0	0	0	0	0
Rosales	Rosaceae	Filipendula	Filipendula vulgaris	1	1	1	1	1	1	1	1	1	1	1	1
Rosales	Rosaceae	Fragaria	Fragaria vesca	1	1	1	1	1	1	1	1	1	1	1	1
Rosales	Rosaceae	Malus	Malus sylvestris	1	1	1	1	1	1	1	1	1	1	1	1
Rosales	Rosaceae	Potentilla	Potentilla anglica	0	0	0	0	0	0	0	0	0	0	0	0
Rosales	Rosaceae	Potentilla	Potentilla anserina	1	1	1	1	1	1	1	1	1	1	1	1
Rosales	Rosaceae	Potentilla	Potentilla erecta	0	0	0	0	0	1	0	0	0	1	0	0
Rosales	Rosaceae	Potentilla	Potentilla neumanniana	1	1	1	1	0	1	0	0	1	1	1	1
Rosales	Rosaceae	Potentilla	Potentilla palustris	1	1	1	1	1	1	1	1	1	1	1	1
Rosales	Rosaceae	Potentilla	Potentilla reptans	0	0	0	0	0	0	0	0	0	0	0	0
Rosales	Rosaceae	Potentilla	Potentilla rupestris	1	1	1	1	1	1	1	1	1	1	1	1
Rosales	Rosaceae	Potentilla	Potentilla sterilis	1	1	1	1	1	1	1	1	1	1	1	1
Rosales	Rosaceae	Prunus	Prunus avium	1	1	1	1	1	0	1	1	1	1	1	1
Rosales	Rosaceae	Prunus	Prunus domestica	0	0	0	0	0	0	0	0	0	0	0	0
Rosales	Rosaceae	Prunus	Prunus padus	1	1	1	1	1	1	1	1	1	1	1	1
Rosales	Rosaceae	Prunus	Prunus spinosa	0	0	0	0	0	0	0	0	0	0	0	0
Rosales	Rosaceae	Pyrus	Pyrus communis	1	1	1	1	1	1	1	1	1	1	1	1
Rosales	Rosaceae	Rosa	Rosa arvensis	0	0	0	0	0	0	0	0	0	0	0	0
Rosales	Rosaceae	Rosa	Rosa caesia	0	0	0	0	0	0	0	0	0	0	0	0
Rosales	Rosaceae	Rosa	Rosa canina	0	0	0	0	0	0	0	0	0	0	0	0
Rosales	Rosaceae	Rosa	Rosa micrantha	0	0	0	0	0	0	0	0	0	0	0	0
Rosales	Rosaceae	Rosa	Rosa mollis	0	0	0	0	0	0	0	0	0	0	0	0
Rosales	Rosaceae	Rosa	Rosa obtusifolia	0	0	0	0	0	0	0	0	0	0	0	0
Rosales	Rosaceae	Rosa	Rosa pimpinellifolia	1	1	1	1	1	1	1	1	1	1	1	1
Rosales	Rosaceae	Rosa	Rosa rubiginosa	0	0	0	0	0	0	0	0	0	0	0	0
Rosales	Rosaceae	Rosa	Rosa sherardii	0	0	0	0	0	0	0	0	0	0	0	0
Rosales	Rosaceae	Rosa	Rosa stylosa	0	0	0	0	0	0	0	0	0	0	0	0
Rosales	Rosaceae	Rosa	Rosa tomentosa	0	0	0	0	0	0	0	0	0	0	0	0
Rosales	Rosaceae	Rubus	Rubus caesius	0	0	0	0	0	1	1	1	0	1	1	1
Rosales	Rosaceae	Rubus	Rubus fruticosus	0	0	0	0	1	1	1	1	1	1	1	1
Rosales	Rosaceae	Rubus	Rubus idaeus	1	1	1	1	1	1	1	1	1	1	1	1
Rosales	Rosaceae	Sanguisorba	Sanguisorba minor	1	1	1	1	1	1	1	1	1	1	1	1
Rosales	Rosaceae	Sanguisorba	Sanguisorba officinalis	1	1	1	1	1	1	1	1	1	1	1	1
Rosales	Rosaceae	Sorbus	Sorbus anglica	0	0	0	0	0	0	0	0	0	0	0	0
Rosales	Rosaceae	Sorbus	Sorbus aria	0	0	0	0	0	0	0	0	0	0	0	0
Rosales	Rosaceae	Sorbus	Sorbus aucuparia	0	0	0	0	0	0	0	0	0	0	0	0
Rosales	Rosaceae	Sorbus	Sorbus cambrensis	0	0	0	0	0	0	0	0	0	0	0	0
Rosales	Rosaceae	Sorbus	Sorbus cuneifolia	0	0	0	0	0	0	0	0	0	0	0	0
Rosales	Rosaceae	Sorbus	Sorbus domestica	1	1	1	1	1	1	1	1	1	1	1	1
Rosales	Rosaceae	Sorbus	Sorbus eminentiformis	0	0	0	0	0	0	0	0	0	0	0	0
Rosales	Rosaceae	Sorbus	Sorbus hibernica	0	0	0	0	0	0	0	0	0	0	0	0
Rosales	Rosaceae	Sorbus	Sorbus leptophylla	0	0	0	0	0	0	0	0	0	0	0	0
Rosales	Rosaceae	Sorbus	Sorbus leyana	0	0	0	0	0	0	0	0	0	0	0	0
Rosales	Rosaceae	Sorbus	Sorbus menai	0	0	0	0	0	0	0	0	0	0	0	0
Rosales	Rosaceae	Sorbus	Sorbus minima	0	0	0	0	0	0	0	0	0	0	0	0
Rosales	Rosaceae	Sorbus	Sorbus porrigentiformis	0	0	0	0	0	0	0	0	0	0	0	0
Rosales	Rosaceae	Sorbus	Sorbus rupicola	0	0	0	0	0	0	0	0	0	0	0	0
Rosales	Rosaceae	Sorbus	Sorbus saxicola	0	0	0	0	0	0	0	0	0	0	0	0
Rosales	Rosaceae	Sorbus	Sorbus stenophylla	0	0	0	0	0	0	0	0	0	0	0	0
Rosales	Rosaceae	Sorbus	Sorbus stirtoniana	0	0	0	0	0	0	0	0	0	0	0	0
Rosales	Rosaceae	Sorbus	Sorbus torminalis	1	1	0	0	1	1	1	1	1	1	1	1
Rosales	Rosaceae	Sorbus	Sorbus whiteana	0	0	0	0	0	0	0	0	0	0	0	0
Rosales	Ulmaceae	Ulmus	Ulmus glabra	0	0	0	0	0	0	0	0	0	0	0	0
Rosales	Ulmaceae	Ulmus	Ulmus minor	0	0	0	0	0	0	0	0	0	0	0	0
Rosales	Ulmaceae	Ulmus	Ulmus procera	0	0	0	0	0	0	0	0	0	0	0	0
Rosales	Urticaceae	Urtica	Urtica dioica	1	1	1	1	1	1	1	1	1	1	1	1
Rosales	Urticaceae	Urtica	Urtica urens	1	1	1	1	1	1	1	1	1	1	1	1
Santalales	Santalaceae	Thesium	Thesium humifusum	1	1	1	1	1	1	1	1	1	1	1	1
Santalales	Santalaceae	Viscum	Viscum album	1	1	1	1	1	1	1	1	1	1	1	1
Sapindales	Sapindaceae	Acer	Acer campestre	1	1	1	1	1	1	1	1	1	1	1	1
Saxifragales	Crassulaceae	Umbilicus	Umbilicus rupestris	1	1	1	1	1	1	1	1	1	1	1	1
Saxifragales	Grossulariaceae	Ribes	Ribes rubrum	1	1	1	1	1	1	1	1	1	1	1	1
Saxifragales	Saxifragaceae	Chrysosplenium	Chrysosplenium oppositifolium	1	1	1	1	1	1	1	1	1	1	1	1
Saxifragales	Saxifragaceae	Saxifraga	Saxifraga hypnoides	1	1	1	1	1	1	1	1	1	1	1	1
Saxifragales	Saxifragaceae	Saxifraga	Saxifraga tridactylites	1	1	1	1	1	1	1	1	1	1	1	1
Solanales	Convolvulaceae	Calystegia	Calystegia sepium	1	0	0	0	1	1	1	1	1	1	1	1
Solanales	Convolvulaceae	Calystegia	Calystegia soldanella	1	0	0	0	1	1	1	1	1	1	1	1
Solanales	Convolvulaceae	Convolvulus	Convolvulus arvensis	1	1	1	1	1	1	1	1	1	1	1	1
Solanales	Solanaceae	Atropa	Atropa belladonna	1	1	1	1	1	1	1	1	1	1	1	1
Solanales	Solanaceae	Hyoscyamus	Hyoscyamus niger	1	1	1	1	1	1	1	1	1	1	1	1
Solanales	Solanaceae	Solanum	Solanum dulcamara	1	1	1	1	1	1	1	1	1	1	1	1
Solanales	Solanaceae	Solanum	Solanum nigrum	1	1	1	1	1	1	1	1	1	1	1	1
			Total	492	462	451	451	599	583	556	555	600	605	561	563
			Percentage	60.8911	57.1782	55.8168	55.8168	74.1337	72.1535	68.8119	68.6881	74.2574	74.8762	69.4307	69.6782
